# Supplementary material
Source: PubMed Central journal article supplement (PMC3839319)
Supplement: NIHMS520276-supplement-1.pdf [file NIHMS520276-supplement-1.pdf]

Supplementary Figures and Tables

**‘Pathogen signatures activate a ubiquitylation pathway that modulates function of the metabolic checkpoint kinase mTOR’**

Stanimir S. Ivanov<sup>1</sup> and Craig R. Roy<sup>1\*</sup>

<sup>1</sup>Department of Microbial Pathogenesis, Yale University School of Medicine, 295 Congress Avenue, New Haven, CT 06536

\* Corresponding Author: [craig.roy@yale.edu](mailto:craig.roy@yale.edu)

# Supplementary Figure 1

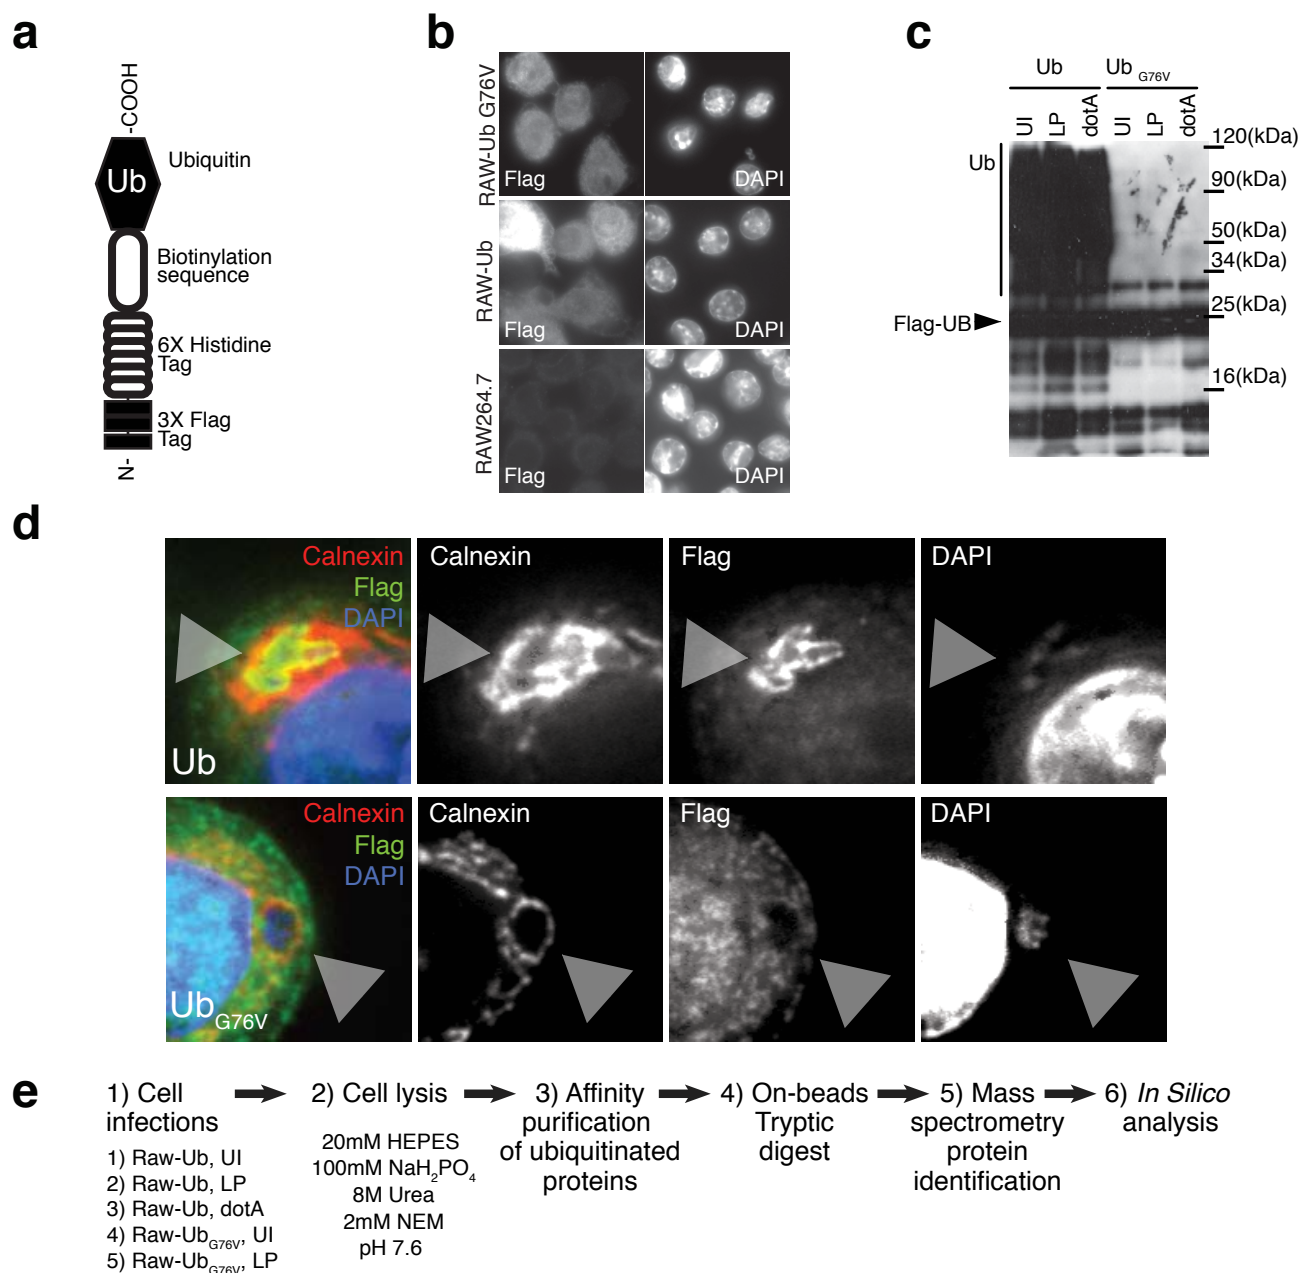

**Supplementary Figure 1. Generation of RAW267.4 macrophages expressing TAP-Ub** (a) Topology of the Tandem-affinity tagged (TAP)-Ubiquitin expression construct expressed by the RAW-Ub macrophages. Ubiquitin was fused to 3XFlag, 6XHistidine and a 75-aa biotinylation motif derived from a *Propionibacterium shermanii* transcarboxylase (b) Immunofluorescence micrographs of parental and derived stable cell lines expressing TAP-Ubiquitin stained with anti-Flag antibody (c and d) WT but not the UB<sub>G76V</sub> Ubiquitin mutant is conjugation competent (c) Immunoblot analysis of TAP-Ub incorporation in ubiquitin conjugates from lysates of stable cell lines uninfected (UI), infected with *Legionella* (LP) or dotA for 4hrs [MOI=40]. (d) The conjugation competent TAP-Ub allele phenocopies endogenous ubiquitin and accumulates on the *Legionella*-containing vacuole in infected RAW-Ub cells. Immunofluorescence micrographs of infected cells stained with anti-Calnexin, anti-Flag and DAPI. LCVs contain DAPI-stained bacteria and accumulate Calnexin. (e) Experimental setup used for identification of ubiquitin-regulated responses in RAW-UB cell infected with different *Legionella* strains for 4hrs [MOI=40]. Cell lysis and protein affinity purification were completed in highly denaturing conditions with a buffer containing 8M Urea to preserve protein post translational modifications.

# Supplementary Figure 2

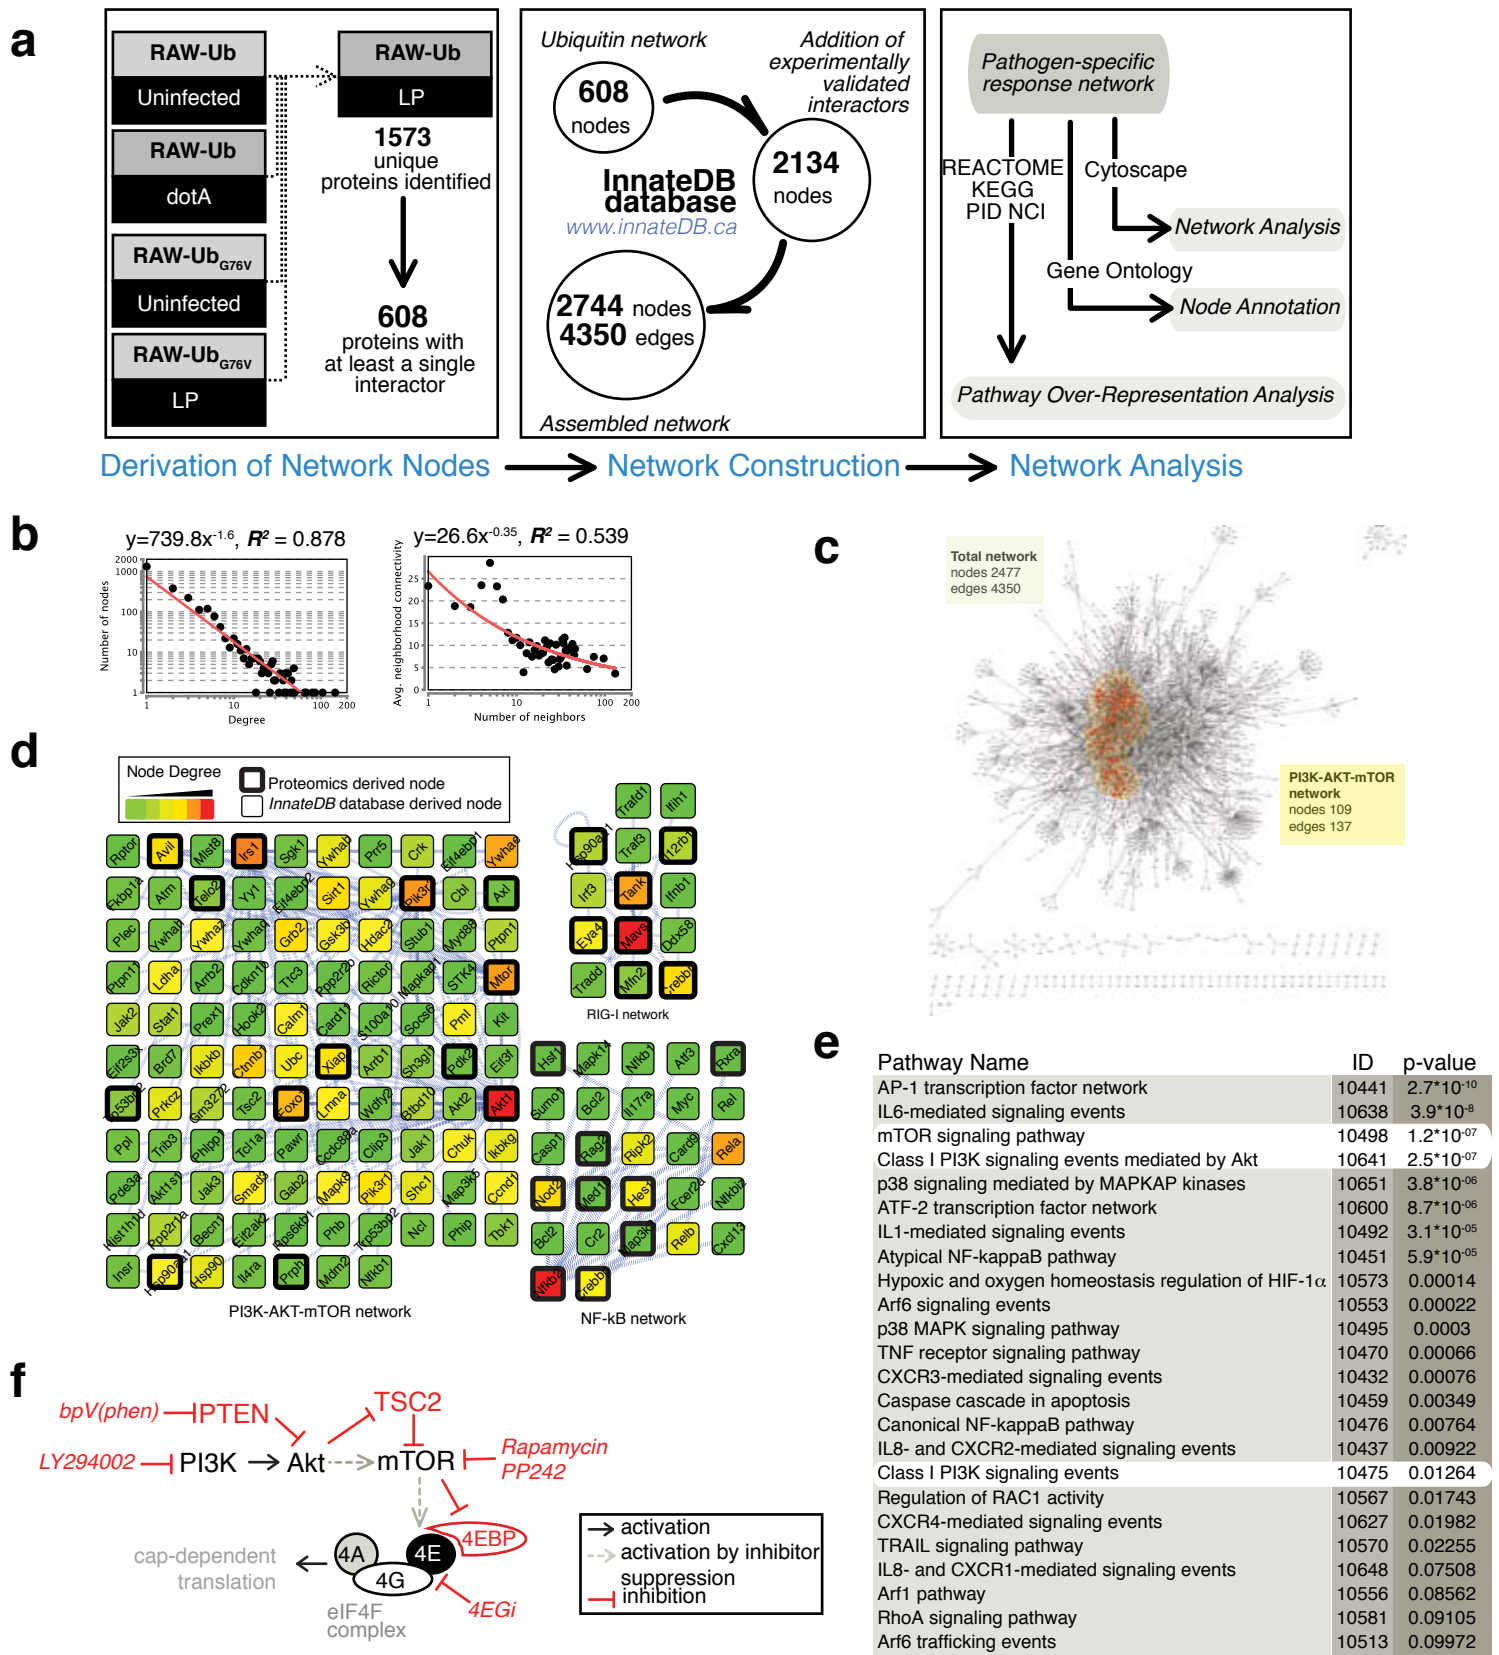

**Supplementary Figure 2. Pathogen-specific network assembly and pathway analysis** (a) Schematics of the pathogen response network analysis in macrophages activated by *Legionella pneumophila*. Nodes unique for RAW-Ub macrophages infected with *Legionella* (LP) were determined by analysis of affinity purified polypeptides identified by mass spectrometry. Network was constructed by the addition of known interactors one degree removed from the experimental nodes (InnateDB database). (b) Power law curve fitted node degree distribution (correlation = 0.878) and neighborhood connectivity distribution (correlation = 0.539) of the total network. (c) Force-directed layout of the pathogen-induced response network. (d) Grid layout of the PI3K-AKT-mTOR, NF-κB and RIG-I sub-network. Nodes identified by proteomics analysis are highlighted. (e) Cellular pathways (PID NCI database) over-represented in the pathogen-specific network generated using hypergeometric algorithm (InnateDB) based on the number of pathway components represented within the network. (f) Regulators of the mTOR pathway. Pharmacological inhibitors (LY294002, bpV(phen), Rapamycin, PP242, 4EGI) and negative protein regulators (PTEN, TSC2 and 4E-BP1/2) are highlighted in red.

# Supplementary Figure 3

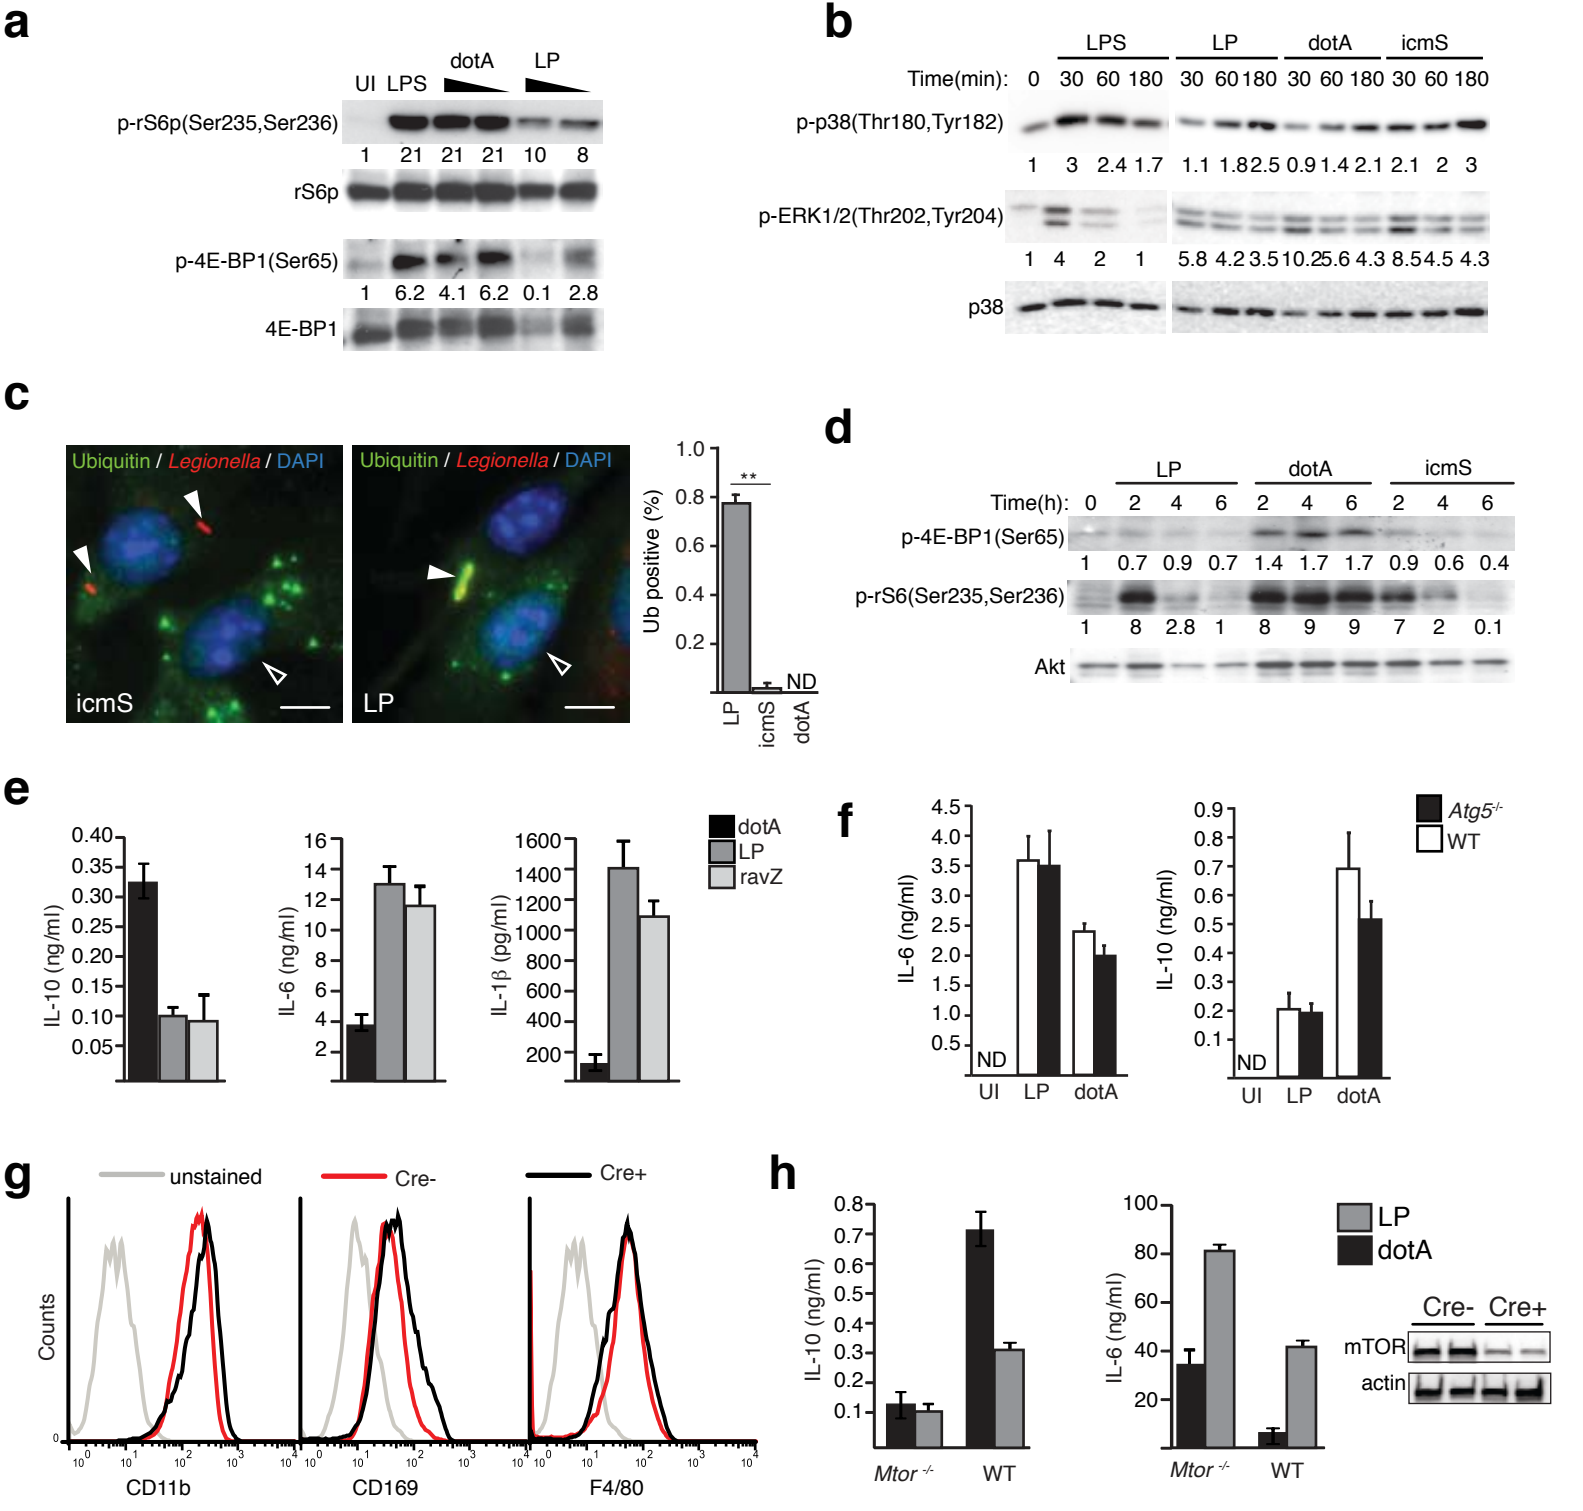

**Supplementary Figure 3. BMMs responses to *Legionella* infection** (a) MOI-dependent suppression of mTOR signaling in *Legionella* (LP) infections. Phosphorylation analysis of 4E-BP1 and rS6p in BMMs infected for 3hrs as indicated [MOI= 40 or 20] (b) Kinetics of ERK1/2 and p38 phosphorylation induced by different *Legionella* strains in BMMs infected as indicated [MOI=20]. (c) Ubiquitinated proteins accumulation at the *Legionella*-containing vacuole (LCV). Representative fluorescent micrographs of synchronized infections of BMMs stained with ubiquitinated polypeptide antibody (FK2) [Bar = 5µm]. *Legionella*-containing vacuoles are indicated with open arrowheads. Quantitation of ubiquitin recruitment to LCV (n>200) is shown, average + s.d of technical triplicates. (\*\*\*) p = 6.7X10<sup>-7</sup> (paired T-test) (d) Suppression of mTOR signaling by the icmS strain. Immunoblot analysis of 4E-BP1 and rS6p phosphorylation in BMMs infected as indicated [MOI =10]. (e-f) Cytokine secretion by different BMMs infected as indicated for 20hrs [MOI=6]. Averages of technical replicates + s.d are shown. (g) FACS analysis of cell surface expression of macrophage markers and immunoblot analysis of mTOR expression in BMMs differentiated from progenitor cells derived from *Mtor<sup>flx/flx</sup>* littermates lacking (Cre-) or expressing Cre recombinase (Cre+). (h) Cytokine secretion by *Mtor<sup>flx/flx</sup>* Cre+ (*Mtor<sup>-/-</sup>*) and *Mtor<sup>flx/flx</sup>* Cre- (WT) BMMs infected as indicated for 20hrs [MOI=6]. Averages of technical replicates + s.d are shown.

# Supplementary Figure 4

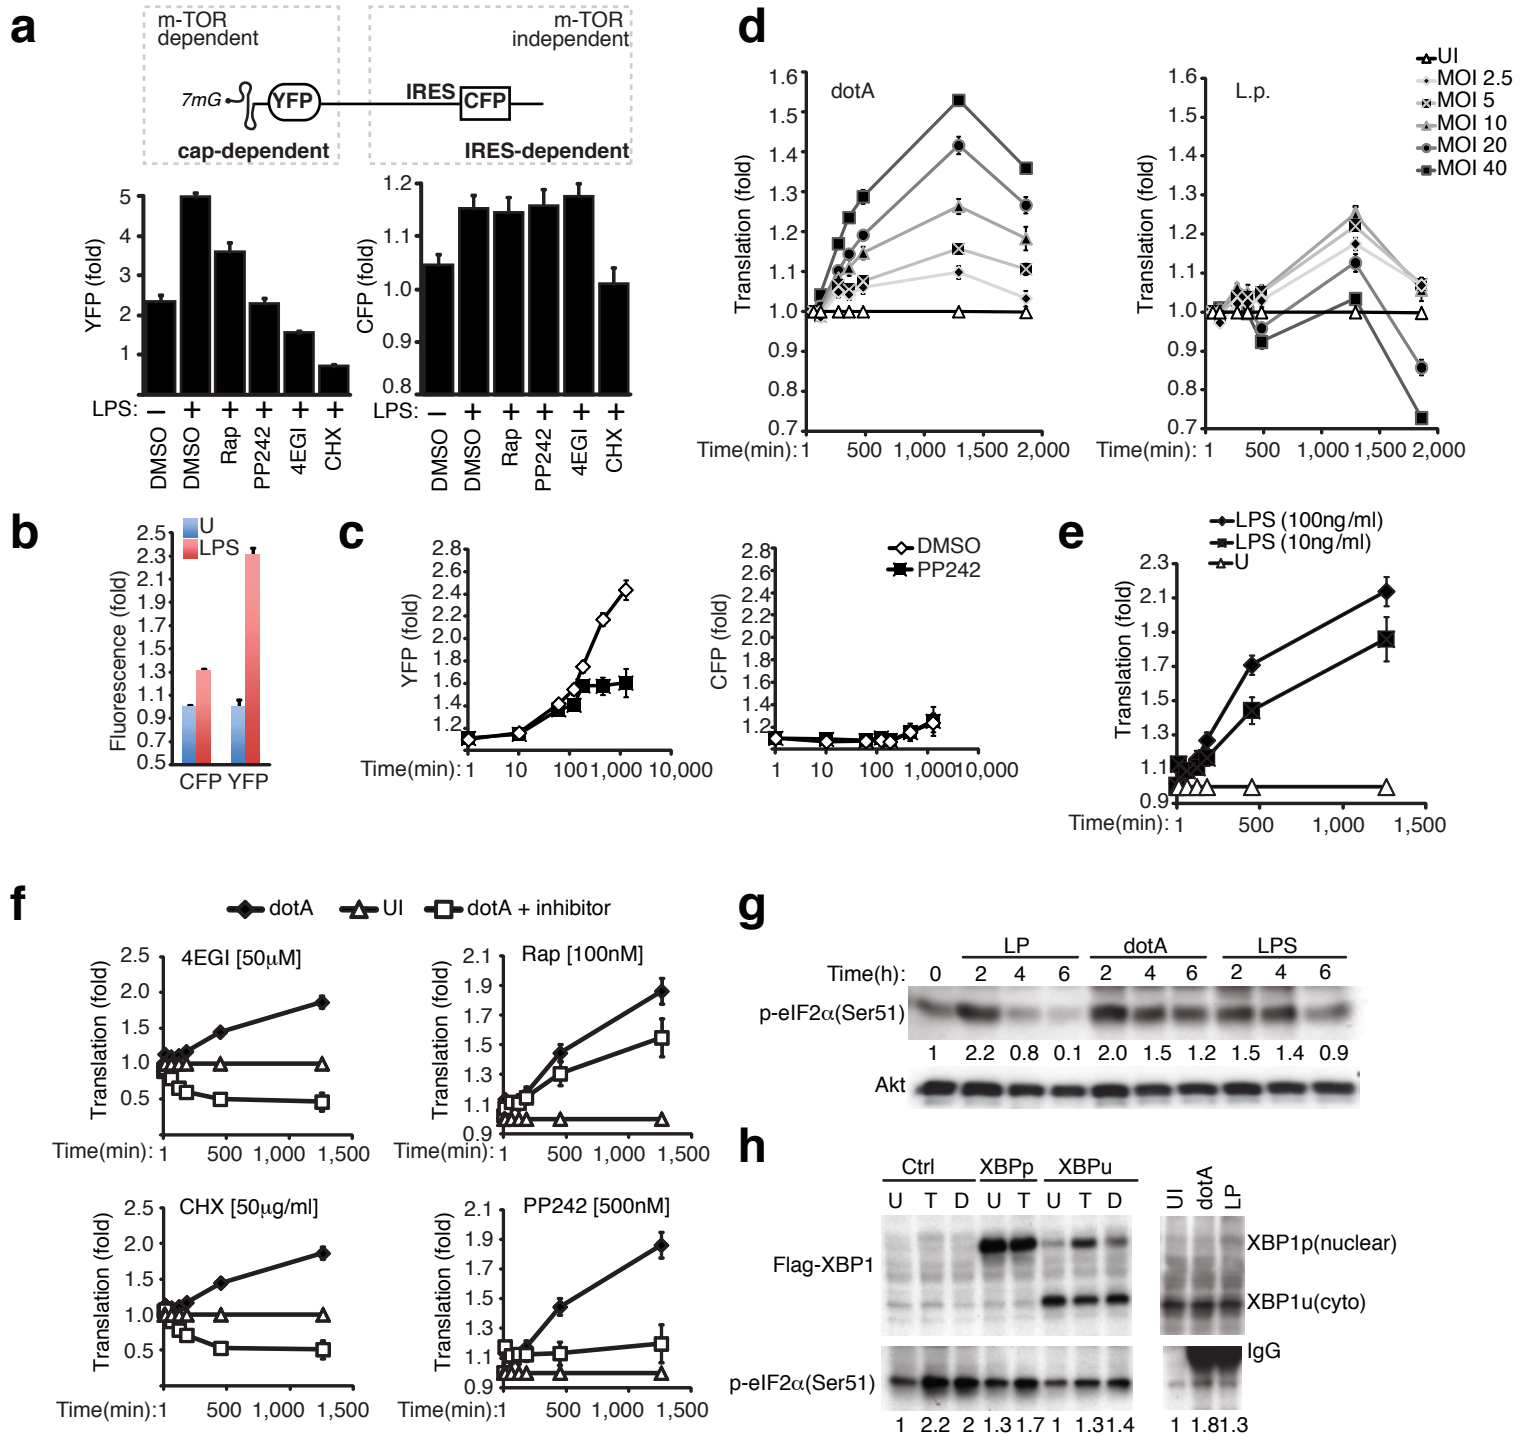

**Supplementary Figure 4. Kinetic analysis of protein translation in live macrophages stably expressing dual fluorescence translational reporter** (a) Increase in YFP and CFP fluorescence in the bicistronic reporter expressing RAW264.7 cells stimulated with LPS (100ng/ml) in the presence translation inhibitors for 8hrs – rapamycin (100nM), PP242 (10μM), 4EGI-1 (5μM) or cycloheximide (50μg/ml). (b) Changes in cap-dependent and IRES-dependent translation monitored by increased YFP and CFP fluorescence, respectively, induced by LPS (100ng/ml). (c) The mTOR inhibitor PP242 blocks induction of cap-dependent YFP fluorescence but not IRES-driven CFP fluorescence in starved cells following addition of growth factors (fetal bovine serum, 10% v/v) (d) Kinetic and MOI analysis of cap-dependent translation suppression in response to *Legionella* infection. CFP fluorescence was used as a normalization factor for the number of cells and cell viability. (e) LPS-induced dose-dependent increase in cap-dependent translation (f) Induction of the cap-dependent YFP fluorescence by dotA is sensitive to inhibition of mTOR (rapamycin and PP242), eIF4F complex assembly (4EGI-1) and translation elongation (cycloheximide). Values in all the panels represent averages of technical triplicates + standard deviation. (g-h) eIF2α regulation in response to *Legionella* infection. Immunoblot analysis for phospho-eIF2α in bone marrow-derived macrophages (g) and HEK293-Fcy-expressing cells (h) infected as indicated. DTT (D) and Thapsigargin (T) are known stimulators of eIF2α phosphorylation and were used as positive controls. XBPu processing results in the expression of XBPp and is a readout for activation of (D) and (T)-induced responses. (U) unstimulated, (UI) uninfected



## Supplementary Figure 5

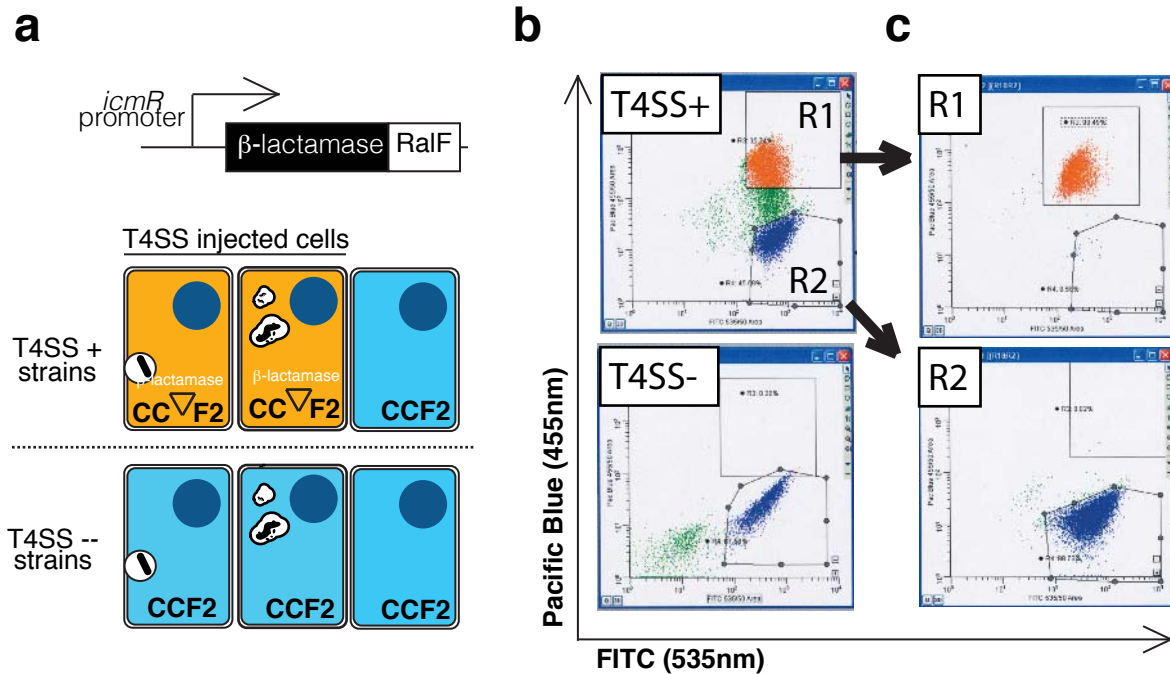

**Supplementary Figure 5.  $\beta$ -Lactamase based assay for isolation of T4SS injected cells from cell cultures infected with *Legionella*** (a) Macrophages loaded with the fluorescent dye CCF2 were infected with w.t or dotA strains expressing  $\beta$ -lactamase fused to the C-terminal secretion signal sequence of the early *Legionella* effector RalF. Translocation of the  $\beta$ -lactamase fusion protein in the cytosol of infected cells by the *Legionella* T4SS causes CCF2 cleavage and shift in fluorescence emission from 535nm to 455nm. (b-c) Representative FACS sort of BMMs infected with either wt (T4SS+) or dotA (T4SS-) strains expressing  $\beta$ -lactamase-RalF fusion. Pre-sort (b) and post-sort (c) analysis of infected BMMs.

# Supplementary Figure 6

**a**

```

1                               25                               50
//10 ACAUUUAGAG ACUUGCUCUUGCACU ACCAAAGCCACAAGGCAGCCUUGCA
    GAAAAGAGAGCUCCAUC AUG
//6  CCAAGAA CGAUAGUCA UUCA GAA ACCGCU AUG
//1a AAGUCUCCAGGGCAGAGAGGGAGUC AACUCAUUGGCGCUUGAGUCGGCAA
    AGAAAUCAAG AUG
//1b CGAGGCCUAAUAGGCUCAUCUGGGA UCCUCUCCAGCCAAGCUUCCUUGUG
    CAAGUGUCUGAAGCAGCU AUG
Tnf  CCUCAGCGAGGACAGCAAGGGACUA GCCAGGAGGGAGAACAGAAACUCCA
    GAACAUCUUGGAAA UAGCUCCAGA AAAGCAAGCAGCCAACCAGGCAGGU
    UCUGUCCCUUUCACUCACUGGCCCA AGGCGCCACAUCUCCCUCCAGAAAA
    GACACC AUG
Ifnb1 GAAUACACGAAUUCU AGAGUCCAU ACCCACGGAGAAAGGACAUUCUAAAC
    UGCAACCUUUCGAAGCCUUUGCUCU GGCACAACAGGUAGUAGGCGACACU
    GUUCGUGUUGUCAAC AUG
  
```

**b**

| <u>Cytokines 5' UTRs</u>          | <u>TOPs containing 5' UTRs</u> |
|-----------------------------------|--------------------------------|
| ▽<br>//10 ...ACATTTAGAGACTTGCTCTT | ▽<br>Rsp20 ...CCTTTCTGAGCCC    |
| //6 ...CCAAGAACGATAGTCAATTC       | Cct2 ...CTTCTCTCTTTC           |
| //1a ...AAGTCTCCAGGGCAGAGAGG      | Nme2 ...ATTCTCTTGCTT           |
| //1b ...CGAGGCCTAATAGGCTCATC      |                                |
| Tnf ...CCTCAGCGAGGACAGCAAGG       |                                |
| Ifnb1 ...GAATACACGAATTCTAGAGT     |                                |

**c**

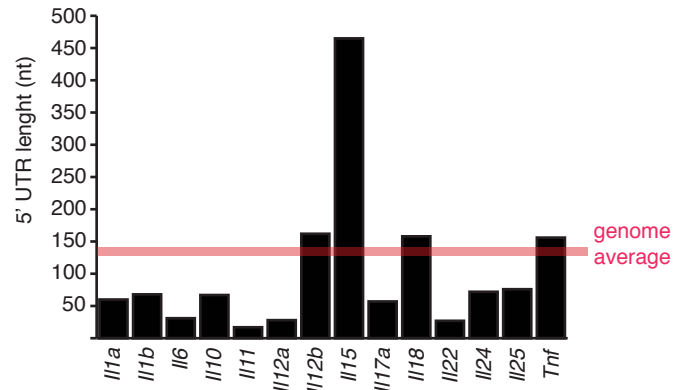

**d**

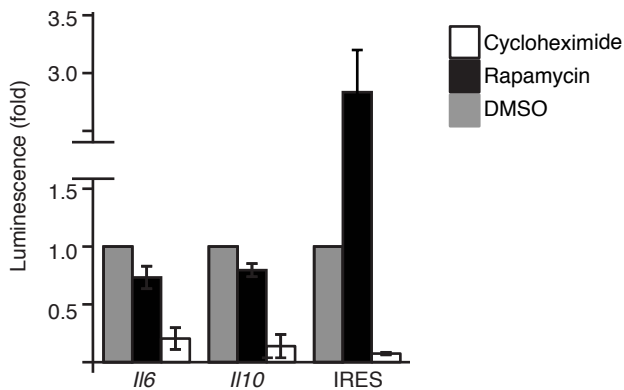

**Supplementary Figure 6. Structural and functional analysis of the 5'UTR of cytokine mRNAs (a)** 5'UTR nucleotide sequence of several pro- and anti-inflammatory cytokine mRNAs. **(b)** Cytokine genes lack 5'-Terminal Oligopyrimidine sequences (TOPs). Pyrimidines, highlighted in red, are not enriched in the 5' UTRs of cytokine mRNAs. Translation of TOPS-containing mRNAs is sensitive to mTOR suppression. Genes encoding bona fide TOPs are shown. **(c)** The 5' UTR length for most cytokine mRNA is shorter than the length average for the mouse genome. **(d)** Expression of luciferase fused to the 5' UTR of mouse //6, //10 or picornavirus IRES sequence in HK293cells transfected for 6hrs. Inhibitors were added at 2hrs post transfection. Luciferase assays were normalized to vehicle controls and represent average of triplicates + standard deviation.

# Supplementary Figure 7

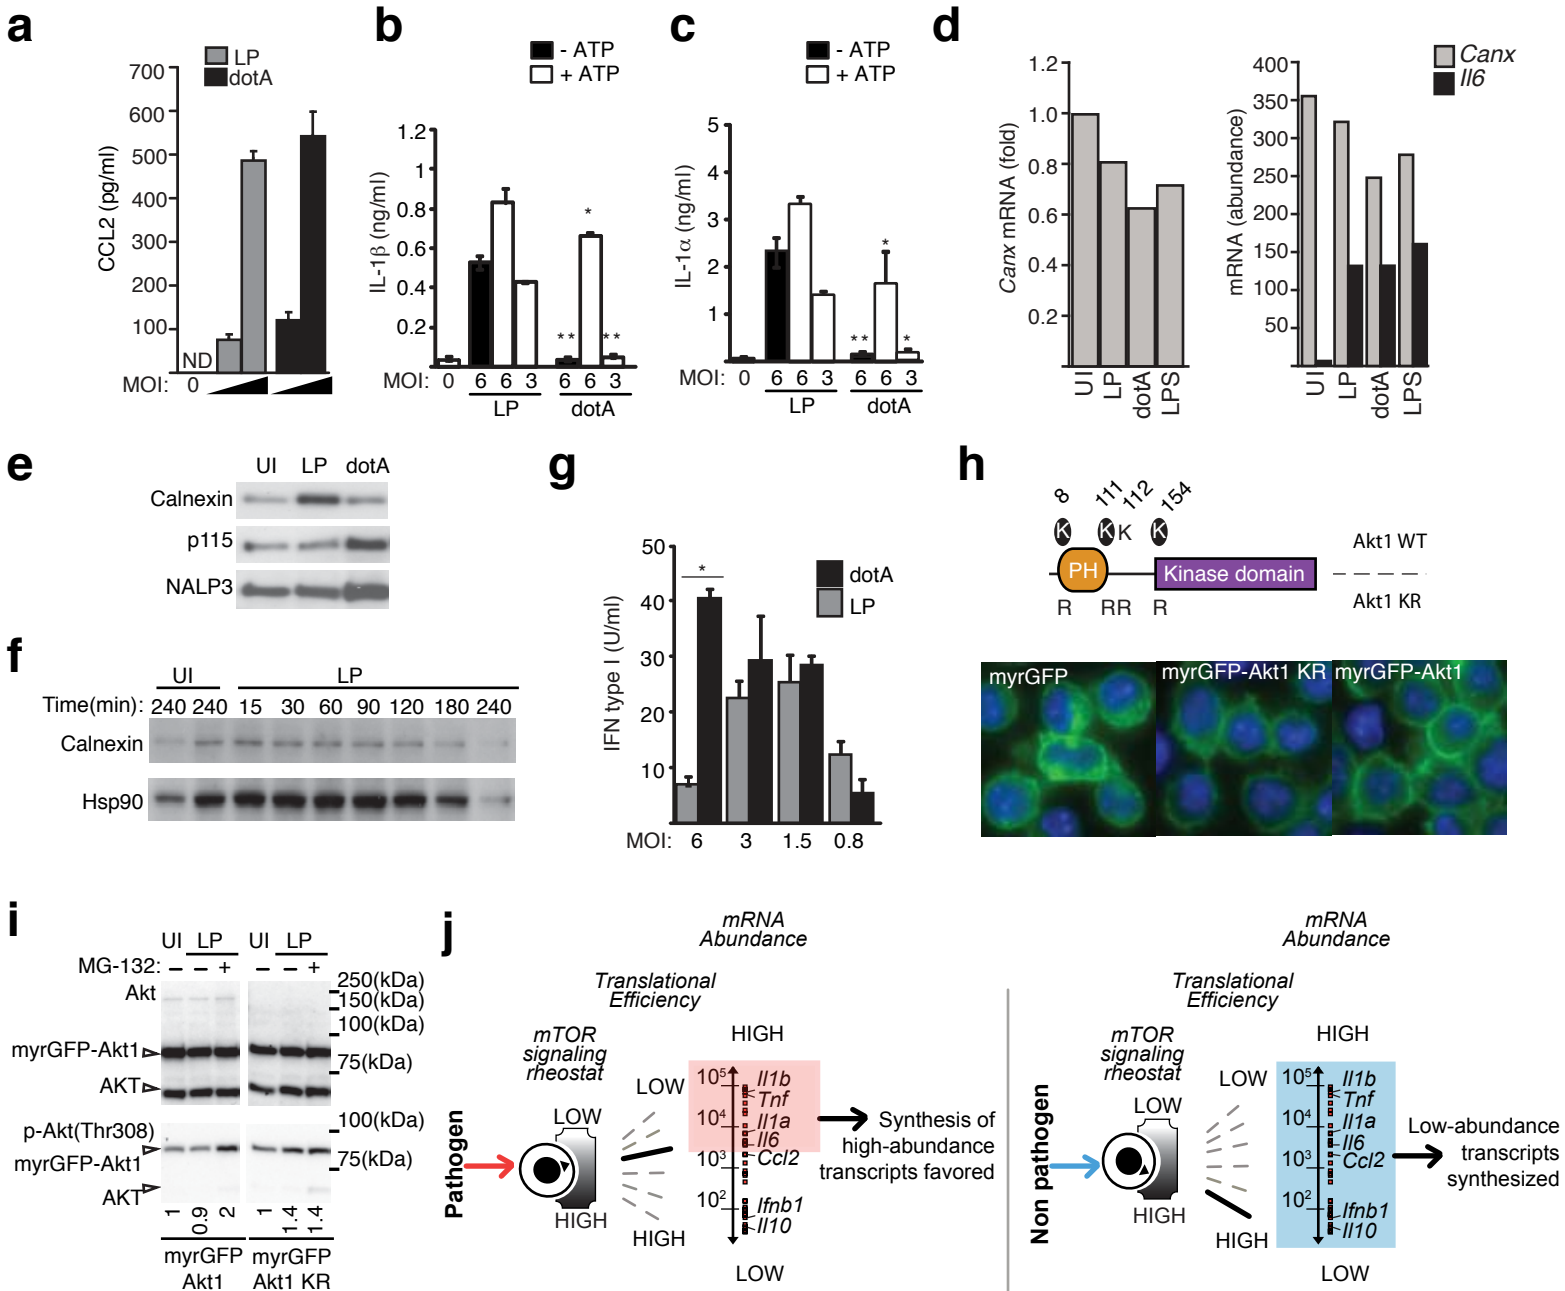

**Supplementary Figure 7. Host responses regulated by Akt and translation in *Legionella* infections** (a-c) Cytokine responses in infected BMMs. Average values of technical replicates + s.d. are shown (\*)  $p < 0.05$  (paired T-test) (a) Secretion of CCL2 induced by LP or dotA [MOI=3 or 6] (b-c) ELISA of secreted IL-1 $\beta$  (b) and IL-1 $\alpha$  (c) produced by BMMs infected as indicated for 18hrs followed stimulation with ATP [1mM] for 30min. Averages of technical replicates + s.d. Significance is indicated between cells infected with LP compared to dotA infections (\*)  $p < 0.05$  (\*\*)  $p < 0.005$ . (d-f) Changes in Calnexin expression induced by LP infection. (d) *Canx* and *Il6* mRNA in BMMs infected as indicated for 4hrs [MOI = 20] or stimulated with LPS [100ng/ml] as determined by *qPCR*. Relative abundance for each transcript shown was normalized to *Gapdh* mRNA. (e) Induction of Calnexin protein in LP infections [7hrs, MOI=10]. (f) Calnexin turnover in BMMs treated with cycloheximide [50 $\mu$ g/ml] and infected as indicated. (g) Type I interferon activity secreted by BMMs infected as indicated as determined by a bioassay. Average values of technical replicates + s.d. are shown (\*)  $p=0.01$  (paired T-test) (h) Schematic of lysine residues on Akt1 ubiquitinated in response to pathogenic *Legionella* that were mutated to arginines in the KR allele. Representative micrographs of J774 mouse macrophage cell lines stably expressing myrGFP, myrGFP-Akt1 or myrGFP-Akt1 KR alleles (i) The proteasome inhibitor MG-132 rescued the loss of phosphorylated myrGFP-Akt1 triggered by LP infection, whereas the phosphorylated KR allele was unaffected. J774 cells stably expressing myrGFP-Akt1 or the myrGFP-Akt1 KR allele were infected in the presence/absence of MG-132 [25 $\mu$ g/ml] for 2hrs [MOI=15]. (j) Model depicting how an mTOR rheostat is tuned in response to pathogen infection. During infection by a pathogenic microbe such as virulent *Legionella*, mTOR activity is suppressed and cap-dependent translation is low. These conditions favor expression of the highly abundant transcripts encoding pro-inflammatory cytokines. During infection by a non-pathogenic microbe, such as dotA, mTOR activity and translational initiation is high, and low abundance transcripts encoding immunosuppressive cytokines can be translated, which balances the inflammatory response to prevent host damage.



**Table S1. List of proteins identified by LC/MS-MS from affinity purifications of ubiquitinated polypeptides specific for Raw-UB macrophages infected with pathogenic *Legionella***

| Uniprot ID | Gene symbol | Gene name | # of validated interactions |
|------------|-------------|-----------|-----------------------------|
| 1          | P42227      | Stat3     | 149                         |
| 2          | P45481      | Crebbp    | 91                          |
| 3          | P62960      | Ybx1      | 59                          |
| 4          | P31750      | Akt1      | 59                          |
| 5          | O09000      | Ncoa3     | 45                          |
| 6          | Q9WVL2      | Stat2     | 30                          |
| 7          | Q60855      | Ripk1     | 37                          |
| 8          | P63017      | Hspa8     | 36                          |
| 9          | O8CIH5      | Plc2      | 36                          |
| 10         | O61188      | Ezh2      | 34                          |
| 11         | Q9CSN1      | Snw1      | 34                          |
| 12         | P28700      | Rxra      | 33                          |
| 13         | O35607      | Bmpr2     | 30                          |
| 14         | P35569      | Irs1      | 29                          |
| 15         | O35613      | Fasx      | 27                          |
| 16         | Q9JLN9      | Mtor      | 27                          |
| 17         | P70347      | IDBG-null | 25                          |
| 18         | P07901      | Hsp90aa1  | 24                          |
| 19         | P09055      | Itgb1     | 24                          |
| 20         | P48432      | Sox2      | 24                          |
| 21         | P39053      | IDBG-null | 23                          |
| 22         | O6PGF3      | Med16     | 21                          |
| 23         | O9ES52      | Inpp5d    | 21                          |
| 24         | O35526      | Stx1a     | 20                          |
| 25         | P09450      | Junb      | 20                          |
| 26         | P70677      | Casp3     | 20                          |
| 27         | P97465      | Dok1      | 20                          |
| 28         | O03267      | Ikzf1     | 20                          |
| 29         | O921K9      | Bcl7b     | 19                          |
| 30         | O9CQU5      | Zwint     | 19                          |
| 31         | Q9CZA6      | Nde1      | 19                          |
| 32         | O9JJJ7      | Porcn     | 19                          |
| 33         | O9R1E0      | Foxo1     | 18                          |
| 34         | O921N2      | Orc1      | 18                          |
| 35         | O88447      | Klc1      | 17                          |
| 36         | O00560      | Il6st     | 17                          |
| 37         | O02858      | Tek       | 17                          |
| 38         | O80TH2      | Erb2ip    | 17                          |
| 39         | O9WTK5      | Nfk2      | 17                          |
| 40         | O35730      | Rinq1     | 16                          |
| 41         | Q61084      | Map3k3    | 16                          |
| 42         | O811D0      | Dla1      | 16                          |
| 43         | Q8BT07      | Cep55     | 16                          |
| 44         | P27870      | Vav1      | 15                          |
| 45         | P97797      | Sirpa     | 15                          |
| 46         | Q60989      | Xiap      | 15                          |
| 47         | Q62018      | Ctr9      | 15                          |
| 48         | O62312      | Tqfr2     | 15                          |
| 49         | O9OUN3      | Blnk      | 15                          |
| 50         | O08908      | Pik3r2    | 14                          |
| 51         | O35082      | Kl        | 14                          |
| 52         | O35615      | Zfp1      | 14                          |
| 53         | P53995      | Anapc1    | 14                          |
| 54         | Q61140      | Bcar1     | 14                          |
| 55         | O77S28      | Nac1      | 14                          |
| 56         | Q9WVG6      | Carm1     | 14                          |
| 57         | P04426      | Wnt1      | 13                          |
| 58         | P23819      | Gria2     | 13                          |
| 59         | P24860      | Ccnb1     | 13                          |
| 60         | P35428      | Hes1      | 13                          |
| 61         | P42669      | Pura      | 13                          |
| 62         | P58929      | Gmeb2     | 13                          |
| 63         | Q60636      | Prdm1     | 13                          |
| 64         | Q61625      | Gria2     | 13                          |
| 65         | O9SK90      | IDBG-null | 13                          |
| 66         | Q90BG3      | Ap2b1     | 13                          |
| 67         | Q9JHG7      | Pik3ca    | 13                          |
| 68         | O88569      | IDBG-null | 12                          |
| 69         | P23772      | Gata3     | 12                          |
| 70         | P41183      | Bcl6      | 12                          |
| 71         | Q61234      | Snta1     | 12                          |
| 72         | O68FD5      | Ctfc      | 12                          |
| 73         | O8C9M2      | Ccdc15    | 12                          |
| 74         | O8CIE6      | Copa      | 12                          |
| 75         | O90253      | Numb      | 12                          |
| 76         | P23818      | Gria1     | 11                          |
| 77         | P50220      | Nkx2-1    | 11                          |
| 78         | P63328      | Ppp3ca    | 11                          |
| 79         | P97432      | Nbr1      | 11                          |
| 80         | O63Z7W      | Inadl     | 11                          |
| 81         | Q88H74      | Nup107    | 11                          |
| 82         | P17427      | Ap2a2     | 10                          |
| 83         | P20152      | Vim       | 10                          |
| 84         | P21784      | Rag2      | 10                          |
| 85         | P22361      | Hnf1a     | 10                          |
| 86         | Q60665      | Skil      | 10                          |
| 87         | O61550      | Rad21     | 10                          |
| 88         | O61937      | Npm1      | 10                          |
| 89         | O63932      | Map2k2    | 10                          |
| 90         | O6P921      | Smarcd3   | 10                          |
| 91         | Q75NR7      | Recq4     | 10                          |
| 92         | O99MD9      | Nasp      | 10                          |
| 93         | O9D902      | Gtf2e2    | 10                          |
| 94         | O9DBC7      | Prkar1a   | 10                          |
| 95         | O35717      | Socs2     | 9                           |
| 96         | O54692      | Zw10      | 9                           |
| 97         | O70157      | Top3a     | 9                           |
| 98         | O70477      | Pknx1     | 9                           |
| 99         | P49718      | Mcm5      | 9                           |
| 100        | P70365      | Ncoa1     | 9                           |
| 101        | P80313      | Cct7      | 9                           |
| 102        | O3UKC1      | Tax1bp1   | 9                           |
| 103        | O69Z11      | Sh3rf1    | 9                           |
| 104        | O8CFE3      | Rcor1     | 9                           |
| 105        | O99NE9      | Pbx4      | 9                           |

|     |        |             |                                                                                                                |   |
|-----|--------|-------------|----------------------------------------------------------------------------------------------------------------|---|
| 106 | O9JM73 | Srf         | serum response factor                                                                                          | 9 |
| 107 | O35904 | Pik3cd      | phosphatidylinositol 3-kinase catalytic delta polypeptide                                                      | 8 |
| 108 | O70421 | Fzd1        | frizzled homolog 1 (Drosophila)                                                                                | 8 |
| 109 | O88487 | Dync1l2     | dynein cytoplasmic 1 intermediate chain 2                                                                      | 8 |
| 110 | P18111 | Cdx1        | caudal type homeobox 1                                                                                         | 8 |
| 111 | P30681 | Hmgb2       | high mobility group box 2                                                                                      | 8 |
| 112 | P48972 | Myl2        | myeloblastosis oncogene-like 2                                                                                 | 8 |
| 113 | P52293 | Kona2       | karyopherin (importin) alpha 2                                                                                 | 8 |
| 114 | P80316 | Cct5        | chaperonin containing Tcd1, subunit 5 (epsilon)                                                                | 8 |
| 115 | O03157 | Aplp1       | amyloid beta (A4) precursor-like protein 1                                                                     | 8 |
| 116 | O3TLR7 | Dtl         | denticleless homolog (Drosophila)                                                                              | 8 |
| 117 | O60848 | Hells       | helicase, lymphoid specific                                                                                    | 8 |
| 118 | O7TMB8 | Cyfp1       | cytoplasmic FMR1 interacting protein 1                                                                         | 8 |
| 119 | O80VW5 | IDBG-null   | whirlin                                                                                                        | 8 |
| 120 | O8JZ09 | Eif3b       | eukaryotic translation initiation factor 3, subunit B                                                          | 8 |
| 121 | O8K117 | Wipf1       | WAS/WASL interacting protein family, member 1                                                                  | 8 |
| 122 | O8R387 | Br08        | bromodomain containing 8                                                                                       | 8 |
| 123 | O8VCF0 | Mavs        | mitochondrial antiviral signaling protein                                                                      | 8 |
| 124 | O8VE28 | Nkd2        | naked cuticle 2 homolog (Drosophila)                                                                           | 8 |
| 125 | O90WV4 | Mif1        | myeloid leukemia factor 1                                                                                      | 8 |
| 126 | O9Z248 | Aebp2       | AE binding protein 2                                                                                           | 8 |
| 127 | O09110 | Map2k3      | mitogen-activated protein kinase kinase 3                                                                      | 7 |
| 128 | P46097 | IDBG-null   | synaptotagmin II                                                                                               | 7 |
| 129 | P50652 | Fancc       | Fanconi anemia, complementation group C                                                                        | 7 |
| 130 | P70206 | Ptxn1       | plexin A1                                                                                                      | 7 |
| 131 | P70217 | Hoxb13      | homeobox D13                                                                                                   | 7 |
| 132 | P70700 | Polr1b      | polymerase (RNA) 1 polypeptide B                                                                               | 7 |
| 133 | O61286 | Tcf12       | transcription factor 12                                                                                        | 7 |
| 134 | O61824 | Adam12      | a disintegrin and metallopeptidase domain 12 (meltrin alpha)                                                   | 7 |
| 135 | O6R891 | Pop1r9b     | protein phosphatase 1, regulatory subunit 9B                                                                   | 7 |
| 136 | O7TP03 | Shprh       | SNF2 histone linker PHD RING helicase                                                                          | 7 |
| 137 | O8BH3  | Cdca8       | cell division cycle associated 8                                                                               | 7 |
| 138 | O8K320 | Nod2        | nucleotide-binding oligomerization domain containing 2                                                         | 7 |
| 139 | O922Y0 | Dyrk3       | dual-specificity tyrosine-(Y)-phosphorylation regulated kinase 3                                               | 7 |
| 140 | O924W6 | IDBG-null   | tripartite motif-containing 66                                                                                 | 7 |
| 141 | O99P17 | Bap1        | Brcal associated protein 1                                                                                     | 7 |
| 142 | O9DBR4 | IDBG-null   | amidol beta (A4), precursor protein-binding, family B, member 2                                                | 7 |
| 143 | O9JIL4 | Pdzk1       | PDZ domain containing 1                                                                                        | 7 |
| 144 | O08856 | El1         | elongation factor RNA polymerase II                                                                            | 6 |
| 145 | O88792 | F11r        | F11 receptor                                                                                                   | 6 |
| 146 | O88904 | Hipk1       | homeodomain interacting protein kinase 1                                                                       | 6 |
| 147 | P18052 | Ptdra       | protein tyrosine phosphatase, receptor type, A                                                                 | 6 |
| 148 | P28229 | Glc1        | gap junction protein, gamma 1                                                                                  | 6 |
| 149 | P53702 | Hccs        | holocytochrome c synthetase                                                                                    | 6 |
| 150 | P68368 | Tuba4a      | tubulin, alpha 4A                                                                                              | 6 |
| 151 | P70188 | Kifap3      | kinesin-associated protein 3                                                                                   | 6 |
| 152 | O60751 | Irf1r       | insulin-like growth factor 1 receptor                                                                          | 6 |
| 153 | O61233 | IDBG-null   | lymphocyte cytosolic protein 1                                                                                 | 6 |
| 154 | O61990 | Pcbp2       | poly(rC) binding protein 2                                                                                     | 6 |
| 155 | O6R3M4 | Poli        | polymerase (DNA directed), iota                                                                                | 6 |
| 156 | O80XA6 | Reps2       | RALBP1 associated Eps domain containing protein 2                                                              | 6 |
| 157 | O92008 | Ivns1abp    | influenza virus NS1A binding protein                                                                           | 6 |
| 158 | O921G8 | Tubacp2     | tubulin, gamma complex associated protein 2                                                                    | 6 |
| 159 | O9D906 | Ata7        | autophagy-related 7 (yeast)                                                                                    | 6 |
| 160 | O9ESJ4 | Nckipso     | NCK interacting protein with SH3 domain                                                                        | 6 |
| 161 | O9JY10 | Pleckho1    | pleckstrin homology domain containing, family O member 1                                                       | 6 |
| 162 | O9WTM5 | Ruvb2       | RuvB-like protein 2                                                                                            | 6 |
| 163 | O9Z191 | Eya4        | eyes absent 4 homolog (Drosophila)                                                                             | 6 |
| 164 | O35495 | Cdk14       | cyclin-dependent kinase 14                                                                                     | 5 |
| 165 | O35737 | Hnmp1       | heterogeneous nuclear ribonucleoprotein H1                                                                     | 5 |
| 166 | P13595 | Ncam1       | neural cell adhesion molecule 1                                                                                | 5 |
| 167 | P16056 | Met         | met proto-oncogene                                                                                             | 5 |
| 168 | P33896 | Ifnar1      | interferon (alpha and beta) receptor 1                                                                         | 5 |
| 169 | P46096 | Syt1        | synaptotagmin I                                                                                                | 5 |
| 170 | P50516 | Atp6v1a     | ATPase, H+ transporting, lysosomal V1 subunit A                                                                | 5 |
| 171 | P50538 | Mxd1        | MAX dimerization protein 1                                                                                     | 5 |
| 172 | P56480 | Atp5b       | ATP synthase, H+ transporting mitochondrial F1 complex, beta subunit                                           | 5 |
| 173 | P60843 | Eif4a1      | eukaryotic translation initiation factor 4A1                                                                   | 5 |
| 174 | P69566 | Ranbp9      | RAN binding protein 9                                                                                          | 5 |
| 175 | P70424 | Erbb2       | v-erb-b2 erythroblastic leukemia viral oncogene homolog 2, neuro/glioblastoma derived oncogene homolog (avian) | 5 |
| 176 | O00993 | Axl         | AXL receptor tyrosine kinase                                                                                   | 5 |
| 177 | O05144 | Rac2        | RAS-related C3 botulinum substrate 2                                                                           | 5 |
| 178 | O06180 | Ptpn2       | protein tyrosine phosphatase, non-receptor type 2                                                              | 5 |
| 179 | O08624 | Hoxc4       | homeobox C4                                                                                                    | 5 |
| 180 | O2NL51 | Gsk3a       | glycogen synthase kinase 3 alpha                                                                               | 5 |
| 181 | O60805 | Mertk       | c-mer proto-oncogene tyrosine kinase                                                                           | 5 |
| 182 | O60837 | Il2rb1      | interleukin 12 receptor, beta 1                                                                                | 5 |
| 183 | O61235 | Sntb2       | syntrophin, basic 2                                                                                            | 5 |
| 184 | O61880 | Dmc1        | DMC1 dosage suppressor of mck1 homolog, meiosis-specific homologous recombination (yeast)                      | 5 |
| 185 | O62219 | Tqfb111     | transforming growth factor beta 1 induced transcript 1                                                         | 5 |
| 186 | O6T264 | Maml1       | mastermind like 1 (Drosophila)                                                                                 | 5 |
| 187 | O811T9 | IDBG-248652 | disrupted in schizophrenia 1                                                                                   | 5 |
| 188 | O8BUR4 | Dock1       | dedicator of cytokinesis 1                                                                                     | 5 |
| 189 | O8CEC0 | Nup88       | nucleoporin 88                                                                                                 | 5 |
| 190 | O8CF10 | Nedd4l      | neural precursor cell expressed, developmentally down-regulated gene 4-like                                    | 5 |
| 191 | O8VIG1 | Rest        | RE1-silencing transcription factor                                                                             | 5 |
| 192 | O8VJ16 | Sfpq        | splicing factor proline/alanine rich (polypyrimidine tract binding protein associated)                         | 5 |
| 193 | O91ZV6 | Seno2       | SUMO/sentrin specific peptidase 2                                                                              | 5 |
| 194 | O9CU62 | Smc1a       | structural maintenance of chromosomes 1A                                                                       | 5 |
| 195 | O9EQW6 | Olig2       | oligodendrocyte transcription factor 2                                                                         | 5 |
| 196 | O9EQZ6 | Rapgef4     | Rap guanine nucleotide exchange factor (GEF) 4                                                                 | 5 |
| 197 | O9ES64 | Ush1c       | Usher syndrome 1C homolog (human)                                                                              | 5 |
| 198 | O9OZL0 | Ripk3       | receptor-interacting serine-threonine kinase 3                                                                 | 5 |
| 199 | O9R0N4 | Syt10       | synaptotagmin X                                                                                                | 5 |
| 200 | O9R0O1 | Syt4        | synaptotagmin-like 4                                                                                           | 5 |
| 201 | O9WV01 | Maq2        | membrane associated guanylate kinase, WW and PDZ domain containing 2                                           | 5 |
| 202 | O9Z1R2 | Bcl6        | BCL2-associated transcription factor 6                                                                         | 5 |
| 203 | O55234 | Psmb5       | proteasome (prosome, macropain) subunit, beta type 5                                                           | 4 |
| 204 | O70372 | Tert        | telomerase reverse transcriptase                                                                               | 4 |
| 205 | P11276 | Fn1         | fibronectin 1                                                                                                  | 4 |
| 206 | P12382 | Pfkf        | phosphofruktokinase, liver, B-type                                                                             | 4 |
| 207 | P18242 | Ctsd        | cathepsin D                                                                                                    | 4 |
| 208 | P33174 | Kif4        | kinesin family member 4                                                                                        | 4 |
| 209 | P45448 | Nr5a2       | nuclear receptor subfamily 5, group A, member 2                                                                | 4 |
| 210 | P48301 | Tead2       | TEA domain family member 2                                                                                     | 4 |
| 211 | P50172 | Hsd11b1     | hydroxysteroid 11-beta dehydrogenase 1                                                                         | 4 |
| 212 | P61264 | Stx1b       | syntaxin 1B                                                                                                    | 4 |
| 213 | P62315 | Snrpd1      | small nuclear ribonucleoprotein D1                                                                             | 4 |
| 214 | P70336 | Rock2       | Rho-associated coiled-coil containing protein kinase 2                                                         | 4 |
| 215 | O00493 | Cpe         | carboxypeptidase E                                                                                             | 4 |
| 216 | O3UJ09 | Fam82a2     | family with sequence similarity 82, member A2                                                                  | 4 |
| 217 | O497V6 | Bahd1       | bromo adjacent homology domain containing 1                                                                    | 4 |
| 218 | O60819 | IDBG-null   | interleukin 15 receptor, alpha chain                                                                           | 4 |
| 219 | O60929 | Mef2a       | myocyte enhancer factor 2A                                                                                     | 4 |
| 220 | O61033 | Tm6p        | thymopoietin                                                                                                   | 4 |
| 221 | O61045 | Sim1        | single-minded homolog 1 (Drosophila)                                                                           | 4 |
| 222 | O61549 | Emr1        | EGF-like module containing, mucin-like, hormone receptor-like sequence 1                                       | 4 |
| 223 | O61830 | Mrc1        | mannose receptor, C type 1                                                                                     | 4 |
| 224 | O62431 | Arid3a      | AT rich interactive domain 3A (BRIGHT-like)                                                                    | 4 |

|     |        |           |                                                                                                           |   |
|-----|--------|-----------|-----------------------------------------------------------------------------------------------------------|---|
| 225 | O6KA07 | Zzz3      | zinc finger, ZZ domain containing 3                                                                       | 4 |
| 226 | O80UE6 | Wnk4      | WNK lysine deficient protein kinase 4                                                                     | 4 |
| 227 | O80X66 | Btb10     | BTB (POZ) domain containing 10                                                                            | 4 |
| 228 | O8CFN5 | Mef2c     | myocyte enhancer factor 2C                                                                                | 4 |
| 229 | O8VEK6 | Ind3      | inhibitor of growth family, member 3                                                                      | 4 |
| 230 | O91VR5 | Ddx1      | DEAD (Asp-Glu-Ala-Asp) box polypeptide 1                                                                  | 4 |
| 231 | O91YU6 | Lzts2     | leucine zipper, putative tumor suppressor 2                                                               | 4 |
| 232 | O91Z31 | Ptbp2     | poly(vimidine) tract binding protein 2                                                                    | 4 |
| 233 | O9WUQ2 | Preb      | prolactin regulatory element binding                                                                      | 4 |
| 234 | O9WVM3 | Anapc7    | anaphase promoting complex subunit 7                                                                      | 4 |
| 235 | O9Z265 | Chek2     | CHK2 checkpoint homolog (S. pombe)                                                                        | 4 |
| 236 | O08689 | Mstn      | myostatin                                                                                                 | 3 |
| 237 | O35450 | Fkbp1     | FK506 binding protein-like                                                                                | 3 |
| 238 | O35864 | Cops5     | COP9 (constitutive photomorphogenic) homolog, subunit 5 (Arabidopsis thaliana)                            | 3 |
| 239 | O88667 | Rrad      | Ras-related associated with diabetes                                                                      | 3 |
| 240 | P18760 | Ch1       | cofilin 1, non-muscle                                                                                     | 3 |
| 241 | P19973 | Lsp1      | lymphocyte specific 1                                                                                     | 3 |
| 242 | P21237 | IDBG-null | brain derived neurotrophic factor                                                                         | 3 |
| 243 | P21841 | Sftpc     | surfactant associated protein C                                                                           | 3 |
| 244 | P24063 | Itaal     | integrin alpha L                                                                                          | 3 |
| 245 | P30306 | Cdc25b    | cell division cycle 25 homolog B (S. pombe)                                                               | 3 |
| 246 | P30873 | Sstr1     | somatostatin receptor 1                                                                                   | 3 |
| 247 | P31695 | Notch4    | Notch gene homolog 4 (Drosophila)                                                                         | 3 |
| 248 | P32043 | Hoxc5     | homeobox C5                                                                                               | 3 |
| 249 | P35441 | Thbs1     | thrombospondin 1                                                                                          | 3 |
| 250 | P38532 | Hsf1      | heat shock factor 1                                                                                       | 3 |
| 251 | P41047 | Fas1      | Fas ligand (TNF superfamily, member 6)                                                                    | 3 |
| 252 | P48379 | Rfx2      | regulatory factor X, 2 (influences HLA class II expression)                                               | 3 |
| 253 | P50404 | Sftpd     | surfactant associated protein D                                                                           | 3 |
| 254 | P51432 | Picb3     | phospholipase C, beta 3                                                                                   | 3 |
| 255 | P55096 | Abcd3     | ATP-binding cassette, sub-family D (ALD), member 3                                                        | 3 |
| 256 | P55849 | Dsc1      | desmocollin 1                                                                                             | 3 |
| 257 | P60469 | Ppfa3     | protein tyrosine phosphatase, receptor type, f polypeptide (PTPRF), interacting protein (liprin), alpha 3 | 3 |
| 258 | P60764 | Rac3      | RAS-related C3 botulinum substrate 3                                                                      | 3 |
| 259 | P62737 | Acta2     | actin, alpha 2, smooth muscle, aorta                                                                      | 3 |
| 260 | P63038 | Hspd1     | heat shock protein 1 (chaperonin)                                                                         | 3 |
| 261 | P63082 | Atp6v0c   | ATPase, H+ transporting, lysosomal V0 subunit C                                                           | 3 |
| 262 | P68433 | Hist1h3i  | histone cluster 1, H3i                                                                                    | 3 |
| 263 | P70181 | Pip5k1b   | phosphatidylinositol-4-phosphate 5-kinase, type 1 beta                                                    | 3 |
| 264 | P70460 | Vasp      | vasodilator-stimulated phosphoprotein                                                                     | 3 |
| 265 | P80317 | Cct6a     | chaperonin containing Tcd1, subunit 6a (zeta)                                                             | 3 |
| 266 | P83510 | IDBG-null | TRAF2 and NCK interacting kinase                                                                          | 3 |
| 267 | P97798 | Neo1      | neogenin                                                                                                  | 3 |
| 268 | O06806 | Tie1      | tyrosine kinase with immunoglobulin-like and EGF-like domains 1                                           | 3 |
| 269 | O08857 | Cd36      | CD36 antigen                                                                                              | 3 |
| 270 | O3UQW2 | Fcho2     | FCH domain only 2                                                                                         | 3 |
| 271 | O3UJ15 | Rai3      | ral quinane nucleotide dissociation stimulator-like 3                                                     | 3 |
| 272 | O5NCY0 | Kdm6b     | KDM1 lysine (K)-specific demethylase 6B                                                                   | 3 |
| 273 | O5SWU9 | Acaca     | acetyl-Coenzyme A carboxylase alpha                                                                       | 3 |
| 274 | O60750 | Epha1     | Eph receptor A1                                                                                           | 3 |
| 275 | O61072 | Adam9     | a disintegrin and metalloproteinase domain 9 (meltrin gamma)                                              | 3 |
| 276 | O61627 | Grid1     | glutamate receptor, ionotropic, delta 1                                                                   | 3 |
| 277 | O61645 | Hr        | hairless                                                                                                  | 3 |
| 278 | O62240 | Kdm5d     | lysine (K)-specific demethylase 5D                                                                        | 3 |
| 279 | O62296 | Tead4     | TEA domain family member 4                                                                                | 3 |
| 280 | O62550 | Pdzr3     | PDZ domain containing RING finger 3                                                                       | 3 |
| 281 | O6RPA0 | Rcor3     | REST corepressor 3                                                                                        | 3 |
| 282 | O6R5P0 | Tlr11     | toll-like receptor 11                                                                                     | 3 |
| 283 | O7TPD6 | Raver2    | ribonucleoprotein, PTB-binding 2                                                                          | 3 |
| 284 | O80U63 | Mfn2      | mitofusin 2                                                                                               | 3 |
| 285 | O80XD1 | Chn2      | chimerin (chimaerin) 2                                                                                    | 3 |
| 286 | O88FU2 | Hist3h2a  | histone cluster 3, H2a                                                                                    | 3 |
| 287 | O8CG79 | IDBG-null | transformation related protein 53 binding protein 2                                                       | 3 |
| 288 | O8K202 | Polr1e    | polymerase (RNA) I polypeptide E                                                                          | 3 |
| 289 | O8K396 | Mnd1      | meiotic nuclear divisions 1 homolog (S. cerevisiae)                                                       | 3 |
| 290 | O8K381 | Fbxo45    | F-box protein 45                                                                                          | 3 |
| 291 | O8R307 | Vps18     | vacuolar protein sorting 18 (yeast)                                                                       | 3 |
| 292 | O8VC19 | Alas1     | aminolevulinic acid synthase 1                                                                            | 3 |
| 293 | O8VD04 | Grip1     | GRIP1 associated protein 1                                                                                | 3 |
| 294 | O8VPD3 | Mical1    | microtubule associated monooxygenase, calponin and LIM domain containing 1                                | 3 |
| 295 | O8VHY0 | Cspq4     | chondroitin sulfate proteoglycan 4                                                                        | 3 |
| 296 | O91V27 | Mlph      | melanophilin                                                                                              | 3 |
| 297 | O91WL8 | Wwox      | WW domain-containing oxidoreductase                                                                       | 3 |
| 298 | O924N4 | Sic12a6   | solute carrier family 12, member 6                                                                        | 3 |
| 299 | O9CQA5 | Med4      | mediator of RNA polymerase II transcription, subunit 4 homolog (yeast)                                    | 3 |
| 300 | O9CY57 | IDBG-null | RIKEN cDNA 250003M10 gene                                                                                 | 3 |
| 301 | O9CY58 | Serp1     | serpin1 mRNA binding protein 1                                                                            | 3 |
| 302 | O9D071 | Mms19     | MMS19 (MET18 S. cerevisiae)                                                                               | 3 |
| 303 | O9DB40 | Med27     | mediator complex subunit 27                                                                               | 3 |
| 304 | O9DC40 | Telo2     | TEL2, telomere maintenance 2, homolog (S. cerevisiae)                                                     | 3 |
| 305 | O9ERH7 | Hipk3     | homeodomain interacting protein kinase 3                                                                  | 3 |
| 306 | O9ERK0 | Ripk4     | receptor-interacting serine-threonine kinase 4                                                            | 3 |
| 307 | O9JIF7 | Copb1     | coatomer protein complex, subunit beta 1                                                                  | 3 |
| 308 | O9JKY5 | Hip1r     | huntingtin interacting protein 1 related                                                                  | 3 |
| 309 | O9JM96 | Cdc42ep4  | CDC42 effector protein (Rho GTPase binding) 4                                                             | 3 |
| 310 | O9QWV9 | Ccnt1     | cyclin T1                                                                                                 | 3 |
| 311 | O9OX96 | Sal12     | sal-like 2 (Drosophila)                                                                                   | 3 |
| 312 | O9OXD8 | Limd1     | LIM domains containing 1                                                                                  | 3 |
| 313 | O9OXY1 | Tjp3      | tight junction protein 3                                                                                  | 3 |
| 314 | O9R1A8 | Rfwd2     | ring finger and WD repeat domain 2                                                                        | 3 |
| 315 | O9R1Y5 | Hic1      | hypermethylated in cancer 1                                                                               | 3 |
| 316 | O9WTK7 | Stk11     | serine/threonine kinase 11                                                                                | 3 |
| 317 | O9WUA3 | Pfkfb     | phosphofructokinase, platelet                                                                             | 3 |
| 318 | O9Z1J1 | Tcf7l1    | transcription factor 7-like 1 (T-cell specific, HMG box)                                                  | 3 |
| 319 | O9Z351 | IDBG-null | potassium voltage-gated channel, subfamily O, member 2                                                    | 3 |
| 320 | AZAM29 | Mllt3     | myeloid/lymphoid or mixed-lineage leukemia (trithorax homolog, Drosophila); translocated to, 3            | 2 |
| 321 | BZRS91 | Rrn3      | RNA polymerase I transcription factor homolog (yeast)                                                     | 2 |
| 322 | O35181 | Nrg3      | neuregulin 3                                                                                              | 2 |
| 323 | O54992 | Mapkapk5  | MAP kinase-activated protein kinase 5                                                                     | 2 |
| 324 | O55176 | Pia1      | praja1, RING-H2 motif containing                                                                          | 2 |
| 325 | O70172 | Pip4k2a   | phosphatidylinositol-5-phosphate 4-kinase, type II, alpha                                                 | 2 |
| 326 | O70481 | Ubr1      | ubiquitin protein ligase E3 component n-recognin 1                                                        | 2 |
| 327 | O88544 | Cops4     | COP9 (constitutive photomorphogenic) homolog, subunit 4 (Arabidopsis thaliana)                            | 2 |
| 328 | O88623 | Usp2      | ubiquitin specific peptidase 2                                                                            | 2 |
| 329 | P00860 | Odc1      | ornithine decarboxylase, structural 1                                                                     | 2 |
| 330 | P03995 | Gfap      | glial fibrillary acidic protein                                                                           | 2 |
| 331 | P08071 | Ltf       | lactoferrin                                                                                               | 2 |
| 332 | P0C056 | H2afz     | H2A histone family, member Z                                                                              | 2 |
| 333 | P0C605 | Prkq1     | protein kinase, cGMP-dependent, type I                                                                    | 2 |
| 334 | P14733 | Lmbn1     | lamin B1                                                                                                  | 2 |
| 335 | P15331 | Prph      | peripherin                                                                                                | 2 |
| 336 | P15920 | Atp6v0a2  | ATPase, H+ transporting, lysosomal V0 subunit A2                                                          | 2 |
| 337 | P22935 | Crabp2    | cellular retinoic acid binding protein II                                                                 | 2 |
| 338 | P27889 | Hnf1b     | HNF1B homeobox B                                                                                          | 2 |
| 339 | P28704 | Rxrb      | retinoid X receptor beta                                                                                  | 2 |
| 340 | P35123 | Usp4      | ubiquitin specific peptidase 4 (proto-oncogene)                                                           | 2 |
| 341 | P35585 | Aplm1     | adaptor-related protein complex AP-1, mu subunit 1                                                        | 2 |
| 342 | P40694 | Iqhmbo2   | immunoglobulin mu binding protein 2                                                                       | 2 |
| 343 | P43247 | Msh2      | mutS homolog 2 (E. coli)                                                                                  | 2 |

|     |        |               |                                                                                                         |   |
|-----|--------|---------------|---------------------------------------------------------------------------------------------------------|---|
| 344 | P43883 | Plin2         | perilipin 2                                                                                             | 2 |
| 345 | P48962 | Slc25a4       | solute carrier family 25 (mitochondrial carrier, adenine nucleotide translocator), member 4             | 2 |
| 346 | P51906 | Slc1a1        | solute carrier family 1 (neuronal/epithelial high affinity glutamate transporter, system Xag), member 1 | 2 |
| 347 | P51944 | Ccnf          | cyclin F                                                                                                | 2 |
| 348 | P56671 | Maz           | MYC-associated zinc finger protein (purine-binding transcription factor)                                | 2 |
| 349 | P61375 | Lhx5          | LIM homeobox protein 5                                                                                  | 2 |
| 350 | P62482 | Kcna2b2       | potassium voltage-gated channel, shaker-related subfamily, beta member 2                                | 2 |
| 351 | P63115 | Slc7a10       | solute carrier family 7 (cationic amino acid transporter, v+ system), member 10                         | 2 |
| 352 | P70326 | Tbx5          | T-box 5                                                                                                 | 2 |
| 353 | P70343 | Casp4         | caspase 4, apoptosis-related cysteine peptidase                                                         | 2 |
| 354 | P97386 | Liq3          | liqase III, DNA, ATP-dependent                                                                          | 2 |
| 355 | O03719 | Kcnd1         | potassium voltage-gated channel, Shal-related family, member 1                                          | 2 |
| 356 | O05AA6 | Drp2          | dystrophin related protein 2                                                                            | 2 |
| 357 | O07139 | IDBG-null     | ect2 oncogene                                                                                           | 2 |
| 358 | O08048 | Haf           | hepatocyte growth factor                                                                                | 2 |
| 359 | O37CH7 | Cul4a         | culin 4A                                                                                                | 2 |
| 360 | O3U133 | Zfp746        | zinc finger protein 746                                                                                 | 2 |
| 361 | O3U604 | Pik3r6        | phosphoinositide-3-kinase, regulatory subunit 6                                                         | 2 |
| 362 | O3UQU0 | Brd9          | bromodomain containing 9                                                                                | 2 |
| 363 | O60596 | Xrcc1         | X-ray repair complementing defective repair in Chinese hamster cells 1                                  | 2 |
| 364 | O60698 | Ski           | ski sarcoma viral oncogene homolog (avian)                                                              | 2 |
| 365 | O60700 | Map3k12       | mitogen-activated protein kinase kinase kinase 12                                                       | 2 |
| 366 | O60739 | Baq1          | BCL2-associated athanogene 1                                                                            | 2 |
| 367 | O60996 | Ppp2r5c       | protein phosphatase 2, regulatory subunit B (B56), gamma isoform                                        | 2 |
| 368 | O61098 | Il18r1        | interleukin 18 receptor 1                                                                               | 2 |
| 369 | O61193 | Rai2          | rai quinone nucleotide dissociation stimulator-like 2                                                   | 2 |
| 370 | O61324 | Arnt2         | aryl hydrocarbon receptor nuclear translocator 2                                                        | 2 |
| 371 | O61330 | Cntn2         | contactin 2                                                                                             | 2 |
| 372 | O61526 | Erbb3         | v-erb-b2 erythroblastic leukemia viral oncogene homolog 3 (avian)                                       | 2 |
| 373 | O64332 | Syn2          | synapsin II                                                                                             | 2 |
| 374 | O64378 | IDBG-null     | FK506 binding protein 5                                                                                 | 2 |
| 375 | O67F72 | Bcl9l         | B-cell CLL/lymphoma 9-like                                                                              | 2 |
| 376 | O6DFV5 | Helz          | helicase with zinc finger domain                                                                        | 2 |
| 377 | O6PGL7 | D6Wsu116e     | DNA segment, Chr 6, Wayne State University 116, expressed                                               | 2 |
| 378 | O6ZQ08 | Cnot1         | CCR4-NOT transcription complex, subunit 1                                                               | 2 |
| 379 | O80VH0 | BanK1         | B-cell scaffold protein with ankyrin repeats 1                                                          | 2 |
| 380 | O81UJ3 | Nfasc         | neurofascin                                                                                             | 2 |
| 381 | O88HD7 | Rod1          | ROD1 regulator of differentiation 1 (S. pombe)                                                          | 2 |
| 382 | O8BZH4 | Pozz          | pozo transposable element with ZNF domain                                                               | 2 |
| 383 | O8C0C0 | Zhx2          | zinc fingers and homeoboxes 2                                                                           | 2 |
| 384 | O8C0I4 | Epc2          | enhancer of polycomb homolog 2 (Drosophila)                                                             | 2 |
| 385 | O8CDM1 | Atad2         | ATPase family, AAA domain containing 2                                                                  | 2 |
| 386 | O8CE00 | Cdk1          | cyclin-dependent kinase-like 1 (CDC2-related kinase)                                                    | 2 |
| 387 | O8CGC6 | Rbm28         | RNA binding motif protein 28                                                                            | 2 |
| 388 | O8CGF6 | Wdr47         | WD repeat domain 47                                                                                     | 2 |
| 389 | O8K0L0 | Asb2          | ankyrin repeat and SOCS box-containing 2                                                                | 2 |
| 390 | O8K2B5 | Fcho1         | FCH1 domain only 1                                                                                      | 2 |
| 391 | O8K4K6 | Mkl1          | MKL (megakaryoblastic leukemia)/myocardin-like 1                                                        | 2 |
| 392 | O8R2K4 | Taf6l         | TAF6-like RNA polymerase II, p300/CBP-associated factor (PCAF)-associated factor                        | 2 |
| 393 | O8R2S9 | Actr8         | ARP8 actin-related protein 8 homolog (S. cerevisiae)                                                    | 2 |
| 394 | O8R4X3 | Rbm12         | RNA binding motif protein 12                                                                            | 2 |
| 395 | O8VEL9 | Rem2          | rad and gem related GTP binding protein 2                                                               | 2 |
| 396 | O8VHH7 | Adcy3         | adenylate cyclase 3                                                                                     | 2 |
| 397 | O8VHR0 | Pcdh18        | protocadherin 18                                                                                        | 2 |
| 398 | O91W50 | Csde1         | cold shock domain containing E1, RNA binding                                                            | 2 |
| 399 | O99N20 | Brms1         | breast cancer metastasis-suppressor 1                                                                   | 2 |
| 400 | O99N88 | Ubain4        | ubiquitin 4                                                                                             | 2 |
| 401 | O99P10 | Ntm           | neurotrimin                                                                                             | 2 |
| 402 | O9CX30 | Yif1b         | Yif1 interacting factor homolog B (S. cerevisiae)                                                       | 2 |
| 403 | O9CXF7 | Chd1l         | chromodomain helicase DNA binding protein 1-like                                                        | 2 |
| 404 | O9CZW5 | Tom70a        | translocase of outer mitochondrial membrane 70 homolog A (yeast)                                        | 2 |
| 405 | O9CX22 | Ccdc123       | coiled-coil domain containing 123                                                                       | 2 |
| 406 | O9D2R0 | Aacs          | acetoacetyl-CoA synthetase                                                                              | 2 |
| 407 | O9D7G9 | Mapk11p1      | mitogen-activated protein kinase 1 interacting protein 1                                                | 2 |
| 408 | O9D903 | Ebna1bp2      | EBNA1 binding protein 2                                                                                 | 2 |
| 409 | O9DBS9 | IDBG-null     | oxysterol binding protein-like 3                                                                        | 2 |
| 410 | O9DC48 | Cdc40         | cell division cycle 40 homolog (yeast)                                                                  | 2 |
| 411 | O9J174 | Klhl1         | kelch-like 1 (Drosophila)                                                                               | 2 |
| 412 | O9JIG7 | Ccdc22        | coiled-coil domain containing 22                                                                        | 2 |
| 413 | O9JK22 | Lanc2         | LanC (bacterial lantibiotic synthetase component C)-like 2                                              | 2 |
| 414 | O9JMB8 | Cntn6         | contactin 6                                                                                             | 2 |
| 415 | O9R1R2 | Trim3         | tripartite motif-containing 3                                                                           | 2 |
| 416 | O9WV18 | Gabbr1        | gamma-aminobutyric acid (GABA) B receptor, 1                                                            | 2 |
| 417 | O9Z0Y7 | Irs4          | insulin receptor substrate 4                                                                            | 2 |
| 418 | O9Z0Z7 | Klf5          | Kruppel-like factor 5                                                                                   | 2 |
| 419 | O9Z103 | IDBG-null     | activity-dependent neuroprotective protein                                                              | 2 |
| 420 | O9Z1N7 | Arid3b        | AT rich interactive domain 3B (BRG1-like)                                                               | 2 |
| 421 | O9Z1T5 | Deaf1         | deformed epidermal autoregulatory factor 1 (Drosophila)                                                 | 2 |
| 422 | O9Z261 | Cldn7         | claudin 7                                                                                               | 2 |
| 423 | A2A791 | Zmym4         | zinc finger, MYM-type 4                                                                                 | 1 |
| 424 | A2AL36 | Cep110        | centrosomal protein 110                                                                                 | 1 |
| 425 | A2RSY1 | 4632411B12Rik | RIKEN cDNA 4632411B12 gene                                                                              | 1 |
| 426 | O08677 | Knq1          | kininogen 1                                                                                             | 1 |
| 427 | O35177 | Nedd9         | neuronal precursor cell expressed, developmentally down-regulated gene 9                                | 1 |
| 428 | O54781 | Srpk2         | serine/arginine-rich protein specific kinase 2                                                          | 1 |
| 429 | O54967 | IDBG-null     | tyrosine kinase, non-receptor, 2                                                                        | 1 |
| 430 | O55106 | Strn          | striatin, calmodulin binding protein                                                                    | 1 |
| 431 | O70306 | Tbx15         | T-box 15                                                                                                | 1 |
| 432 | O70309 | Itqb5         | integrin beta 5                                                                                         | 1 |
| 433 | O88312 | Aqr2          | anterior gradient 2 (Xenopus laevis)                                                                    | 1 |
| 434 | O88398 | Avil          | advillin                                                                                                | 1 |
| 435 | P00342 | Ldhc          | lactate dehydrogenase C                                                                                 | 1 |
| 436 | P08074 | Cbr2          | carbonyl reductase 2                                                                                    | 1 |
| 437 | P09922 | Mx2           | myxovirus (influenza virus) resistance 2                                                                | 1 |
| 438 | P10630 | Eif4a2        | eukaryotic translation initiation factor 4A2                                                            | 1 |
| 439 | P13020 | Gsn           | gelsolin                                                                                                | 1 |
| 440 | P16879 | Fes           | feline sarcoma oncogene                                                                                 | 1 |
| 441 | P18911 | Rarq          | retinoic acid receptor, gamma                                                                           | 1 |
| 442 | P19096 | Fasn          | fatty acid synthase                                                                                     | 1 |
| 443 | P20239 | Zp2           | zona pellucida glycoprotein 2                                                                           | 1 |
| 444 | P21550 | Eno3          | enolase 3, beta muscle                                                                                  | 1 |
| 445 | P26369 | U2af2         | U2 small nuclear ribonucleoprotein auxiliary factor (U2AF) 2                                            | 1 |
| 446 | P26638 | Sars          | seryl-aminoacyl-tRNA synthetase                                                                         | 1 |
| 447 | P37804 | Taqln         | transqualin                                                                                             | 1 |
| 448 | P40630 | Tfam          | transcription factor A, mitochondrial                                                                   | 1 |
| 449 | P41230 | Kdm5c         | lysine (K)-specific demethylase 5C                                                                      | 1 |
| 450 | P41242 | IDBG-null     | meakaryocyte-associated tyrosine kinase                                                                 | 1 |
| 451 | P42209 | IDBG-null     | sepin 1                                                                                                 | 1 |
| 452 | P47963 | Rpl13         | ribosomal protein L13                                                                                   | 1 |
| 453 | P48437 | Prox1         | prospero-related homeobox 1                                                                             | 1 |
| 454 | P50247 | Gm4737        | predicted gene 4737                                                                                     | 1 |
| 455 | P50544 | Acadvl        | acyl-Coenzyme A dehydrogenase, very long chain                                                          | 1 |
| 456 | P51829 | Adcy7         | adenylate cyclase 7                                                                                     | 1 |
| 457 | P51881 | Slc25a5       | solute carrier family 25 (mitochondrial carrier, adenine nucleotide translocator), member 5             | 1 |
| 458 | P53347 | Osm           | oncostatin M                                                                                            | 1 |
| 459 | P56564 | Slc1a3        | solute carrier family 1 (glial high affinity glutamate transporter), member 3                           | 1 |
| 460 | P56695 | Wfs1          | Wolfram syndrome 1 homolog (human)                                                                      | 1 |
| 461 | P58501 | Cfcf1         | GC-rich sequence DNA-binding factor 1                                                                   | 1 |
| 462 | P59511 | Adams20       | a disintegrin-like and metallopeptidase (reprolysin type) with thrombospondin type 1 motif, 20          | 1 |

|     |        |               |                                                                                                |   |
|-----|--------|---------------|------------------------------------------------------------------------------------------------|---|
| 463 | P62812 | Gabra1        | gamma-aminobutyric acid (GABA) A receptor, subunit alpha 1                                     | 1 |
| 464 | P62889 | Rpl30-ps8     | ribosomal protein L30, pseudo gene 8                                                           | 1 |
| 465 | P63137 | Gabbr2        | gamma-aminobutyric acid (GABA) A receptor, subunit beta 2                                      | 1 |
| 466 | P63143 | Kcnab1        | potassium voltage-gated channel, shaker-related subfamily, beta member 1                       | 1 |
| 467 | P63268 | Acta2         | actin, gamma 2, smooth muscle, enteric                                                         | 1 |
| 468 | P69744 | Trpv5         | transient receptor potential cation channel, subfamily V, member 5                             | 1 |
| 469 | P70298 | Cux2          | cut-like homeobox 2                                                                            | 1 |
| 470 | P97326 | Cdh6          | cadherin 6                                                                                     | 1 |
| 471 | P97329 | Kif20a        | kinesin family member 20A                                                                      | 1 |
| 472 | P97793 | Alk           | anaplastic lymphoma kinase                                                                     | 1 |
| 473 | O02853 | Mmp11         | matrix metalloproteinase 11                                                                    | 1 |
| 474 | O04735 | Cdk16         | cyclin-dependent kinase 16                                                                     | 1 |
| 475 | O07797 | Lgals3bp      | lectin, galactoside-binding, soluble, 3 binding protein                                        | 1 |
| 476 | O08122 | Tle3          | transducin-like enhancer of split 3, homolog of Drosophila E(spl)                              | 1 |
| 477 | O08943 | Ssrp1         | structure specific recognition protein 1                                                       | 1 |
| 478 | O0PMG2 | Mdaa1         | MAM domain containing glycosylphosphatidylinositol anchor 1                                    | 1 |
| 479 | O149F3 | Gsp12         | G1 to S phase transition 2                                                                     | 1 |
| 480 | O2VPV4 | Mlxip         | MLX interacting protein                                                                        | 1 |
| 481 | O3THK3 | Gtf2f1        | general transcription factor IIF, polypeptide 1                                                | 1 |
| 482 | O3TX08 | Trmt1         | TRM1 tRNA methyltransferase 1 homolog (S. cerevisiae)                                          | 1 |
| 483 | O3TX57 | IDBG-null     | proteasome (prosome, macropain) 26S subunit, non-ATPase, 1                                     | 1 |
| 484 | O3TYD6 | Lmtk2         | lemur tyrosine kinase 2                                                                        | 1 |
| 485 | O3U3T8 | IDBG-null     | WD repeat domain 62                                                                            | 1 |
| 486 | O3U497 | Cd300lb       | CD300 antigen like family member B                                                             | 1 |
| 487 | O3UTJ2 | Sorbs2        | sorbin and SH3 domain containing 2                                                             | 1 |
| 488 | O58FA4 | E2f8          | E2F transcription factor 8                                                                     | 1 |
| 489 | O60664 | Lrrmp         | lymphoid-restricted membrane protein                                                           | 1 |
| 490 | O61390 | Cct6b         | chaperonin containing Tcp1, subunit 6b (zeta)                                                  | 1 |
| 491 | O61626 | Grik5         | glutamate receptor, ionotropic, kainate 5 (gamma 2)                                            | 1 |
| 492 | O61712 | Dnaic1        | DnaJ (Hsp40) homolog, subfamily C, member 1                                                    | 1 |
| 493 | O61762 | Kcna5         | potassium voltage-gated channel, shaker-related subfamily, member 5                            | 1 |
| 494 | O62314 | Tqoln1        | trans-qolqi network protein                                                                    | 1 |
| 495 | O62415 | Ppp1r13b      | protein phosphatase 1, regulatory (inhibitor) subunit 13B                                      | 1 |
| 496 | O62481 | Vps72         | vacuolar protein sorting 72 (yeast)                                                            | 1 |
| 497 | O64522 | Hist2h2ab     | histone cluster 2, H2ab                                                                        | 1 |
| 498 | O64687 | St8sia1       | ST8 alpha-N-acetylneuraminidase alpha-2,8-sialyltransferase 1                                  | 1 |
| 499 | O6A037 | N4bp1         | NEB4 binding protein 1                                                                         | 1 |
| 500 | O6DTY7 | Pfkfb4        | 6-phosphofructo-2-kinase/fructose-2,6-bisphosphatase 4                                         | 1 |
| 501 | O6NVF4 | Helb          | helicase (DNA) B                                                                               | 1 |
| 502 | O6PGN3 | Dclk2         | doublecortin-like kinase 2                                                                     | 1 |
| 503 | O6URW6 | Myh14         | myosin, heavy polypeptide 14                                                                   | 1 |
| 504 | O7TQHO | Atxn2l        | ataxin 2-like                                                                                  | 1 |
| 505 | O7TS11 | Plekhm1       | pleckstrin homolog domain containing, family M (with RUN domain) member 1                      | 1 |
| 506 | O80TR4 | Slit1         | slit homolog 1 (Drosophila)                                                                    | 1 |
| 507 | O80U78 | Pum1          | pumilio 1 (Drosophila)                                                                         | 1 |
| 508 | O80V03 | IDBG-null     | aaRF domain containing kinase 5                                                                | 1 |
| 509 | O80V11 | Trim56        | tripartite motif-containing 56                                                                 | 1 |
| 510 | O80X44 | Zbtb24        | zinc finger and BTB domain containing 24                                                       | 1 |
| 511 | O80XF5 | I122ra2       | interleukin 22 receptor, alpha 2                                                               | 1 |
| 512 | O81109 | Pcyt1b        | phosphate cytidylyltransferase 1, choline, beta isoform                                        | 1 |
| 513 | O8BGH4 | Reep1         | receptor accessory protein 1                                                                   | 1 |
| 514 | O8BH34 | Sema3d        | sema domain, immunoglobulin domain (Iq), short basic domain, secreted, (semaphorin) 3D         | 1 |
| 515 | O8BH57 | Wdr48         | WD repeat domain 48                                                                            | 1 |
| 516 | O8BIH0 | Sap130        | Sin3A associated protein                                                                       | 1 |
| 517 | O8BJ58 | Mdm2          | Mdm2, transformed 3T3 cell double minute p53 binding protein                                   | 1 |
| 518 | O8BL48 | Unk           | unlabeled homolog (Drosophila)                                                                 | 1 |
| 519 | O8BM33 | Shc2          | SHC (Src homology 2 domain containing) transforming protein 2                                  | 1 |
| 520 | O8BMG1 | Atrip         | ATR interacting protein                                                                        | 1 |
| 521 | O8BO30 | IDBG-null     | RIKEN cDNA 2310014H01 gene                                                                     | 1 |
| 522 | O8BTY2 | Slc4a7        | solute carrier family 4, sodium bicarbonate cotransporter, member 7                            | 1 |
| 523 | O8BV05 | Ppme1         | protein phosphatase methyltransferase 1                                                        | 1 |
| 524 | O8BX57 | Pxk           | PX domain containing serine/threonine kinase                                                   | 1 |
| 525 | O8BZ23 | Wwp1          | WW domain containing E3 ubiquitin protein ligase 1                                             | 1 |
| 526 | O8C0D9 | IDBG-null     | centrosomal protein 68                                                                         | 1 |
| 527 | O8C0J6 | Ankrd58       | ankyrin repeat domain 58                                                                       | 1 |
| 528 | O8C954 | A630007B06Rik | RIKEN cDNA A630007B06 gene                                                                     | 1 |
| 529 | O8CD12 | Fbxo43        | F-box protein 43                                                                               | 1 |
| 530 | O8CE46 | Pus7l         | pseudouridylyl synthase 7 homolog (S. cerevisiae)-like                                         | 1 |
| 531 | O8CFW7 | Cc2d2a        | coiled-coil and C2 domain containing 2A                                                        | 1 |
| 532 | O8CGK3 | Lonp1         | lon peptidase 1, mitochondrial                                                                 | 1 |
| 533 | O8CGK5 | I128ra        | interleukin 28 receptor alpha                                                                  | 1 |
| 534 | O8CGN5 | Plin1         | perilipin 1                                                                                    | 1 |
| 535 | O8CIZ8 | Vwf           | Von Willebrand factor homolog                                                                  | 1 |
| 536 | O8CJ91 | Cd209b        | CD209b antigen                                                                                 | 1 |
| 537 | O8K297 | Git25d1       | glycosyltransferase 25 domain containing 1                                                     | 1 |
| 538 | O8K2B3 | Sdha          | succinate dehydrogenase complex, subunit A, flavoprotein (Fp)                                  | 1 |
| 539 | O8K2K6 | Arcf1         | ARFAP with FG repeats 1                                                                        | 1 |
| 540 | O8K327 | Zfp828        | zinc finger protein 828                                                                        | 1 |
| 541 | O8K371 | Amot2         | angiomin-like 2                                                                                | 1 |
| 542 | O8K314 | Myrip         | myosin VIIA and Rab interacting protein                                                        | 1 |
| 543 | O8K329 | Pom121        | nuclear pore membrane protein 121                                                              | 1 |
| 544 | O8K424 | Trpv3         | transient receptor potential cation channel, subfamily V, member 3                             | 1 |
| 545 | O8R1A4 | IDBG-null     | dedicator of cytokinesis 7                                                                     | 1 |
| 546 | O8R1F1 | Fam129b       | family with sequence similarity 129, member B                                                  | 1 |
| 547 | O8R570 | Snap47        | synaptosomal-associated protein, 47                                                            | 1 |
| 548 | O8VC03 | Nrbf2         | nuclear receptor binding factor 2                                                              | 1 |
| 549 | O8VD31 | Tapbp1        | TAP binding protein-like                                                                       | 1 |
| 550 | O8VEB1 | Grk5          | G protein-coupled receptor kinase 5                                                            | 1 |
| 551 | O8VHW2 | Cacnq8        | calcium channel, voltage-dependent, gamma subunit 8                                            | 1 |
| 552 | O91V92 | Acly          | ATP citrate lyase                                                                              | 1 |
| 553 | O91X43 | Sh3d19        | SH3 domain protein D19                                                                         | 1 |
| 554 | O91XU0 | Wrmip1        | Werner helicase interacting protein 1                                                          | 1 |
| 555 | O91Y44 | Brdt          | bromodomain, testis-specific                                                                   | 1 |
| 556 | O920A9 | Fcrla         | Fc receptor-like A                                                                             | 1 |
| 557 | O921M4 | Golga2        | golqi autoantigen, golqin subfamily a, 2                                                       | 1 |
| 558 | O922W5 | Pycr1         | pyrroline-5-carboxylate reductase 1                                                            | 1 |
| 559 | O925O8 | IDBG-null     | dachshund 2 (Drosophila)                                                                       | 1 |
| 560 | O99246 | Cacna1d       | calcium channel, voltage-dependent, L type, alpha 1D subunit                                   | 1 |
| 561 | O99JH7 | C1stn3        | calsynenin 3                                                                                   | 1 |
| 562 | O99K30 | Eps8l2        | EPS8-like 2                                                                                    | 1 |
| 563 | O99KG3 | IDBG-null     | RNA binding motif protein 10                                                                   | 1 |
| 564 | O99KY4 | Gak           | cyclin G associated kinase                                                                     | 1 |
| 565 | O99LB2 | Dhrs4         | dehydrogenase/reductase (SDR family) member 4                                                  | 1 |
| 566 | O99P47 | Cntnap4       | contactin associated protein-like 4                                                            | 1 |
| 567 | O99P88 | Nup155        | nucleoporin 155                                                                                | 1 |
| 568 | O9CQ33 | Lztr1         | leucine zipper-like transcriptional regulator, 1                                               | 1 |
| 569 | O9CR68 | Ucrof1        | ubiquitin-cytochrome c reductase, Rieske iron-sulfur polypeptide 1                             | 1 |
| 570 | O9CS74 | Ecd           | ecdysoneless homolog (Drosophila)                                                              | 1 |
| 571 | O9CW79 | Golqa1        | golqi autoantigen, golqin subfamily a, 1                                                       | 1 |
| 572 | O9CWF6 | Bbs2          | Bardet-Biedl syndrome 2 (human)                                                                | 1 |
| 573 | O9CW99 | Ddx47         | DEAD (Asp-Glu-Ala-Asp) box polypeptide 47                                                      | 1 |
| 574 | O9CXF0 | Kynu          | kynureninase (L-kynurenine hydrolase)                                                          | 1 |
| 575 | O9CZ44 | Nsf1c         | NSFL1 (p97) cofactor (p47)                                                                     | 1 |
| 576 | O9CZW4 | IDBG-null     | acyl-CoA synthetase long-chain family member 3                                                 | 1 |
| 577 | O9D1R9 | Rpl34         | ribosomal protein L34                                                                          | 1 |
| 578 | O9D2E2 | Toe1          | target of EGFR, member 1 (nuclear)                                                             | 1 |
| 579 | O9D6J4 | Necab3        | N-terminal EF-hand calcium binding protein 3                                                   | 1 |
| 580 | O9D7D2 | Serpin9       | serine (or cysteine) peptidase inhibitor, clade A (alpha-1 antitrypsin, antitrypsin), member 9 | 1 |
| 581 | O9DBR1 | Xrn2          | 5'-3' exoribonuclease 2                                                                        | 1 |



|     |        |                |                                                                                     |   |
|-----|--------|----------------|-------------------------------------------------------------------------------------|---|
| 582 | O9DC70 | Ndufs7         | NADH dehydrogenase (ubiquinone) Fe-S protein 7                                      | 1 |
| 583 | O9EQ61 | Pes1           | pescadillo homolog 1, containing BRCT domain (zebrafish)                            | 1 |
| 584 | O9EH2  | Erap1          | endoplasmic reticulum aminopeptidase 1                                              | 1 |
| 585 | O9EYO0 | Ern1           | endoplasmic reticulum (ER) to nucleus signalling 1                                  | 1 |
| 586 | O9ES30 | C1qtnf3        | C1q and tumor necrosis factor related protein 3                                     | 1 |
| 587 | O9ES83 | Bves           | blood vessel epicardial substance                                                   | 1 |
| 588 | O9ESG9 | Pkmv1          | protein kinase, membrane associated tyrosine/threonine 1                            | 1 |
| 589 | O9JIP7 | Slc15a1        | solute carrier family 15 (oligopeptide transporter), member 1                       | 1 |
| 590 | O9JIS7 | IDBG-null      | calcium channel, voltage-dependent, alpha 1F subunit                                | 1 |
| 591 | O9JU8  | Sh3bpl         | SH3-binding domain glutamic acid-rich protein like                                  | 1 |
| 592 | O9JK42 | Pdk2           | pyruvate dehydrogenase kinase, isoenzyme 2                                          | 1 |
| 593 | O9JL70 | Fanca          | Fanconi anemia, complementation group A                                             | 1 |
| 594 | O9JM93 | Arl6ip4        | ADP-ribosylation factor-like 6 interacting protein 4                                | 1 |
| 595 | O9QY40 | Plexb3         | plexin B3                                                                           | 1 |
| 596 | O9OZC1 | Trpc3          | transient receptor potential cation channel, subfamily C, member 3                  | 1 |
| 597 | O9R0M0 | Celsr2         | cadherin, EGF LAG seven-pass G-type receptor 2 (flamingo homolog, Drosophila)       | 1 |
| 598 | O9R0N7 | Svt7           | synaptotagmin VII                                                                   | 1 |
| 599 | O9WV31 | Arc            | activity regulated cytoskeletal-associated protein                                  | 1 |
| 600 | O9WVP9 | Mx2            | myxovirus (influenza virus) resistance 2                                            | 1 |
| 601 | O9WVR4 | Fxr2           | fragile X mental retardation, autosomal homolog 2                                   | 1 |
| 602 | O9Z0W3 | Nup160         | nucleoporin 160                                                                     | 1 |
| 603 | O9Z125 | Creb3l1        | cAMP responsive element binding protein 3-like 1                                    | 1 |
| 604 | O9Z139 | Ror1           | receptor tyrosine kinase-like orphan receptor 1                                     | 1 |
| 605 | O9Z1G3 | Atp6v1c1       | ATPase, H+ transporting, lysosomal V1 subunit C1                                    | 1 |
| 606 | O9Z1K5 | Arl1           | ariadne ubiquitin-conjugating enzyme E2 binding protein homolog 1 (Drosophila)      | 1 |
| 607 | O9Z1M8 | Ik             | IK cytokine                                                                         | 1 |
| 608 | O9Z2W8 | Gria4          | glutamate receptor, ionotropic, AMPA4 (alpha 4)                                     | 1 |
| 609 | A1A586 | Tbc1d25        | TBC1 domain family, member 25                                                       | 0 |
| 610 | A2A699 | Fam171a2       | family with sequence similarity 171, member A2                                      | 0 |
| 611 | A2A6T1 | Cdr2l          | cerebellar degeneration-related protein 2-like                                      | 0 |
| 612 | A2A891 | Camta1         | calmodulin binding transcription activator 1                                        | 0 |
| 613 | A2AC93 | Dnaic2         | dynein, axonemal, intermediate chain 2                                              | 0 |
| 614 | A2ACJ2 | Z310003H01Rik  | RIKEN cDNA Z310003H01 gene                                                          | 0 |
| 615 | A2AFR3 | Frmpl4         | FERM and PDZ domain containing 4                                                    | 0 |
| 616 | A2AFS3 | Z330417C22Rik  | RIKEN cDNA Z330417C22 gene                                                          | 0 |
| 617 | A2AHL1 | Ano3           | anoctamin 3                                                                         | 0 |
| 618 | A2AI08 | Tpm            | taperin                                                                             | 0 |
| 619 | A2AJA7 | Mamdc4         | MAM domain containing 4                                                             | 0 |
| 620 | A2AJB7 | Lcn5           | lipocalin 5                                                                         | 0 |
| 621 | A2AKY4 | Zfp804a        | zinc finger protein 804A                                                            | 0 |
| 622 | A2ALK8 | Ptpn3          | protein tyrosine phosphatase, non-receptor type 3                                   | 0 |
| 623 | A2APV2 | Fmnl2          | formin-like 2                                                                       | 0 |
| 624 | A2AR50 | Ralaps1        | Ral GEF with PH domain and SH3 binding motif 1                                      | 0 |
| 625 | A2ATU0 | Dhtkd1         | dehydrogenase E1 and transketolase domain containing 1                              | 0 |
| 626 | A2AVA0 | Svep1          | sushi, von Willebrand factor type A, EGF and pentraxin domain containing 1          | 0 |
| 627 | A2AVJ5 | Prr5l          | proline rich 5 like                                                                 | 0 |
| 628 | A2AWP8 | Arhgef10l      | Rho guanine nucleotide exchange factor (GEF) 10-like                                | 0 |
| 629 | A2RS01 | Glb1l3         | galactosidase, beta 1 like 3                                                        | 0 |
| 630 | A2RTF1 | Catsperb       | cation channel, sperm-associated, beta                                              | 0 |
| 631 | A3FIN4 | Atp8b5         | ATPase, class I, type 8B, member 5                                                  | 0 |
| 632 | A4Q9E4 | Ttl2           | tubulin tyrosine liase-like family, member 2                                        | 0 |
| 633 | A4Q9F0 | Ttl7           | tubulin tyrosine liase-like family, member 7                                        | 0 |
| 634 | A4Q9F1 | Ttl8           | tubulin tyrosine liase-like family, member 8                                        | 0 |
| 635 | A6H584 | Col6a5         | collagen, type VI, alpha 5                                                          | 0 |
| 636 | A6H603 | Nwd1           | NACHT and WD repeat domain containing 1                                             | 0 |
| 637 | A6H694 | Lrrc63         | leucine rich repeat containing 63                                                   | 0 |
| 638 | A6H6A4 | Lrrc64         | leucine-rich repeats and IQ motif containing 4                                      | 0 |
| 639 | A6H6A9 | Rabgap1l       | RAB GTPase activating protein 1-like                                                | 0 |
| 640 | A6H6E9 | Ttc23l         | tetratricopeptide repeat domain 23-like                                             | 0 |
| 641 | A7E1Z1 | Tmem215        | transmembrane protein 215                                                           | 0 |
| 642 | A7L9Z8 | IDBG-null      | ATPase, Ca++ transporting, type 2C, member 2                                        | 0 |
| 643 | B2RR83 | Ythdc2         | YTH domain containing 2                                                             | 0 |
| 644 | B2RRE4 | Zfp518b        | zinc finger protein 518B                                                            | 0 |
| 645 | B2RXC1 | D030016E14Rik  | RIKEN cDNA D030016E14 gene                                                          | 0 |
| 646 | B2RY04 | Dock5          | dedicator of cytokinesis 5                                                          | 0 |
| 647 | B9EKX1 | Z3110082D06Rik | RIKEN cDNA Z3110082D06 gene                                                         | 0 |
| 648 | C6K899 | Catsperc2      | cation channel, sperm-associated, gamma 2                                           | 0 |
| 649 | O08528 | Hk2            | hexokinase 2                                                                        | 0 |
| 650 | O08532 | Cacna2d1       | calcium channel, voltage-dependent, alpha2/delta subunit 1                          | 0 |
| 651 | O08582 | Gtpbp1         | GTP binding protein 1                                                               | 0 |
| 652 | O08762 | Prss12         | protease, serine, 12 neurotrypsin (motopsin)                                        | 0 |
| 653 | O08917 | Flot1          | flotillin 1                                                                         | 0 |
| 654 | O35219 | Kcnh2          | potassium voltage-gated channel, subfamily H (eag-related), member 2                | 0 |
| 655 | O35655 | Ppef1          | protein phosphatase with EF hand calcium-binding domain 1                           | 0 |
| 656 | O35690 | Phox2b         | paired-like homeobox 2b                                                             | 0 |
| 657 | O35710 | Ccrm4l         | CCR4 carbon catabolite repression 4-like (S. cerevisiae)                            | 0 |
| 658 | O35892 | Spl100         | leucine antigen Spl100                                                              | 0 |
| 659 | O35945 | Aldehyde1a7    | aldehyde dehydrogenase family 1, subfamily A7                                       | 0 |
| 660 | O54827 | Atp10a         | ATPase, class V, type 10A                                                           | 0 |
| 661 | O54931 | AF064781       | A kinase (PRKA) anchor protein 2                                                    | 0 |
| 662 | O55029 | Copb2          | coatamer protein complex, subunit beta 2 (beta prime)                               | 0 |
| 663 | O55189 | Ambn           | ameloblastin                                                                        | 0 |
| 664 | O70167 | Plk3c2q        | phosphatidylinositol 3-kinase, C2 domain containing, gamma polypeptide              | 0 |
| 665 | O70291 | Grik4          | G protein-coupled receptor kinase 4                                                 | 0 |
| 666 | O70342 | Npy5r          | neuropeptide Y receptor Y5                                                          | 0 |
| 667 | O70355 | Etnl2          | butyrophilin-like 2                                                                 | 0 |
| 668 | O70362 | Gpld1          | glycosylphosphatidylinositol specific phospholipase D1                              | 0 |
| 669 | O70576 | Staq3          | stromal antigen 3                                                                   | 0 |
| 670 | O88199 | Chst3          | carbohydrate (chondroitin 6/keratan) sulfotransferase 3                             | 0 |
| 671 | O88533 | Ddc            | dopa decarboxylase                                                                  | 0 |
| 672 | O88622 | Parq           | poly (ADP-ribose) glycohydrolase                                                    | 0 |
| 673 | O88630 | Gosr1          | golgi SNAP receptor complex member 1                                                | 0 |
| 674 | O88693 | Uqcq           | UDP-glucose ceramide glucosyltransferase                                            | 0 |
| 675 | O88735 | Mtap7          | microtubule-associated protein 7                                                    | 0 |
| 676 | O88842 | Fcd3           | FYVE, RhoGEF and PH domain containing 3                                             | 0 |
| 677 | O88844 | Idh1           | isocitrate dehydrogenase 1 (NADP+), soluble                                         | 0 |
| 678 | O88855 | Ltb4r1         | leukotriene B4 receptor 1                                                           | 0 |
| 679 | O88866 | Hunk           | hormonally upregulated Neu-associated kinase                                        | 0 |
| 680 | O88878 | Zfand5         | zinc finger, AN1-type domain 5                                                      | 0 |
| 681 | O88995 | Nfkbil1        | nuclear factor of kappa light polypeptide gene enhancer in B-cells inhibitor-like 1 | 0 |
| 682 | O89001 | Cpd            | carboxypeptidase D                                                                  | 0 |
| 683 | O89103 | Cd93           | CD93 antigen                                                                        | 0 |
| 684 | P01942 | Hba-a2         | hemoglobin alpha, adult chain 2                                                     | 0 |
| 685 | P04186 | Cfb            | complement factor B                                                                 | 0 |
| 686 | P05202 | Got2           | glutamate oxaloacetate transaminase 2, mitochondrial                                | 0 |
| 687 | P05214 | Tuba3b         | tubulin, alpha 3B                                                                   | 0 |
| 688 | P06330 | Gm16717        | predicted gene, 16717                                                               | 0 |
| 689 | P07742 | Rrm1           | ribonucleotide reductase M1                                                         | 0 |
| 690 | P08249 | Mdh2           | malate dehydrogenase 2, NAD (mitochondrial)                                         | 0 |
| 691 | P09838 | Dnnt           | deoxynucleotidyltransferase, terminal                                               | 0 |
| 692 | P0C192 | Lrrc4b         | leucine rich repeat containing 4B                                                   | 0 |
| 693 | P0C511 | Gpr25          | G protein-coupled receptor 25                                                       | 0 |
| 694 | P0C776 | Atxn1l         | ataxin 1-like                                                                       | 0 |
| 695 | P10853 | Hist1h2bf      | histone cluster 1, H2bf                                                             | 0 |
| 696 | P11031 | Sub1           | SUB1 homolog (S. cerevisiae)                                                        | 0 |
| 697 | P11088 | Fla            | flaqaarin                                                                           | 0 |
| 698 | P11725 | Otc            | ornithine transcarbamylase                                                          | 0 |
| 699 | P13412 | Tnni2          | troponin I, skeletal, fast 2                                                        | 0 |
| 700 | P14685 | Psmd3          | proteasome (prosome, macropain) 26S subunit, non-ATPase, 3                          | 0 |

|     |        |               |                                                                                       |   |
|-----|--------|---------------|---------------------------------------------------------------------------------------|---|
| 701 | P15388 | Kcnc1         | potassium voltage gated channel, Shaw-related subfamily, member 1                     | 0 |
| 702 | P15539 | Cyp11b2       | cytochrome P450, family 11, subfamily b, polypeptide 2                                | 0 |
| 703 | P15656 | Fgf5          | fibroblast growth factor 5                                                            | 0 |
| 704 | P16332 | Mut           | methylenetetrahydrofolate-Coenzym A mutase                                            | 0 |
| 705 | P16406 | Enpep         | glutamyl aminopeptidase                                                               | 0 |
| 706 | P17183 | Eno2          | enolase 2, gamma neuronal                                                             | 0 |
| 707 | P18826 | Phka1         | phosphorylase kinase alpha 1                                                          | 0 |
| 708 | P20852 | Cyp2a5        | cytochrome P450, family 2, subfamily a, polypeptide 5                                 | 0 |
| 709 | P21447 | IDBG-null     | ATP-binding cassette, sub-family B (MDR/TAP), member 1A                               | 0 |
| 710 | P21956 | Mfge8         | milk fat globule-EGF factor 8 protein                                                 | 0 |
| 711 | P23440 | Pde6b         | phosphodiesterase 6B, cGMP, rod receptor, beta polypeptide                            | 0 |
| 712 | P23607 | Zfa           | zinc finger protein, autosomal                                                        | 0 |
| 713 | P23738 | Hdc           | histidine decarboxylase                                                               | 0 |
| 714 | P24547 | Impdh2        | inosine 5'-phosphate dehydrogenase 2                                                  | 0 |
| 715 | P25318 | Col8a2        | collagen, type VIII, alpha 2                                                          | 0 |
| 716 | P25444 | Rps2          | ribosomal protein S2                                                                  | 0 |
| 717 | P27664 | Pde6a         | phosphodiesterase 6A, cGMP-specific, rod, alpha                                       | 0 |
| 718 | P29788 | Vtn           | vitronectin                                                                           | 0 |
| 719 | P30677 | Gna14         | guanine nucleotide binding protein, alpha 14                                          | 0 |
| 720 | P30730 | Lhcar         | luteinizing hormone/choriogonadotropin receptor                                       | 0 |
| 721 | P35375 | Ptger1        | prostaglandin E receptor 1 (subtype EP1)                                              | 0 |
| 722 | P39061 | Col18a1       | collagen, type XVIII, alpha 1                                                         | 0 |
| 723 | P40142 | Tkt           | transketolase                                                                         | 0 |
| 724 | P41438 | IDBG-null     | solute carrier family 19 (sodium/hydrogen exchanger), member 1                        | 0 |
| 725 | P42125 | Eci1          | enoyl-Coenzym A delta isomerase 1                                                     | 0 |
| 726 | P46978 | IDBG-null     | STT3, subunit of the oligosaccharyltransferase complex, homolog A (S. cerevisiae)     | 0 |
| 727 | P47338 | Aldh2         | aldehyde dehydrogenase 2, mitochondrial                                               | 0 |
| 728 | P47740 | Aldh3a2       | aldehyde dehydrogenase family 3, subfamily A2                                         | 0 |
| 729 | P47877 | Igfbp2        | insulin-like growth factor binding protein 2                                          | 0 |
| 730 | P48722 | Hspa4l        | heat shock protein 4 like                                                             | 0 |
| 731 | P48964 | Cdc25a        | cell division cycle 25 homolog A (S. pombe)                                           | 0 |
| 732 | P49135 | Ercc3         | excision repair cross-complementing rodent repair deficiency, complementation group 3 | 0 |
| 733 | P49222 | Epb4.2        | erythrocyte protein band 4.2                                                          | 0 |
| 734 | P49749 | Evx2          | even skipped homeotic gene 2 homolog                                                  | 0 |
| 735 | P51410 | Rpl9-ps4      | ribosomal protein L9, pseudo gene 4                                                   | 0 |
| 736 | P52785 | Gucy2e        | guanylate cyclase 2e                                                                  | 0 |
| 737 | P52787 | Gif           | gastric intrinsic factor                                                              | 0 |
| 738 | P52950 | Dbx1          | developing brain homeobox 1                                                           | 0 |
| 739 | P53026 | Rpl10a        | ribosomal protein L10A                                                                | 0 |
| 740 | P53657 | Pklr          | pyruvate kinase liver and red blood cell                                              | 0 |
| 741 | P53783 | Sox3          | SRY-box containing gene 3                                                             | 0 |
| 742 | P53784 | Sox3          | SRY-box containing gene 3                                                             | 0 |
| 743 | P54279 | Pms2          | postmeiotic segregation increased 2 (S. cerevisiae)                                   | 0 |
| 744 | P54285 | Cacnb3        | calcium channel, voltage-dependent, beta 3 subunit                                    | 0 |
| 745 | P54923 | Adprh         | ADP-ribosylarginine hydrolase                                                         | 0 |
| 746 | P55065 | Pltp          | phospholipid transfer protein                                                         | 0 |
| 747 | P55066 | Ncan          | neurocan                                                                              | 0 |
| 748 | P55292 | Dsc2          | desmocollin 2                                                                         | 0 |
| 749 | P56183 | Rrp1          | ribosomal RNA processing 1 homolog (S. cerevisiae)                                    | 0 |
| 750 | P56375 | IDBG-null     | acylphosphatase 2, muscle type                                                        | 0 |
| 751 | P56974 | IDBG-null     | neuregulin 2                                                                          | 0 |
| 752 | P58021 | Tm9sf2        | transmembrane 9 superfamily member 2                                                  | 0 |
| 753 | P58406 | Hrh3          | histamine receptor H3                                                                 | 0 |
| 754 | P58545 | Btdb3         | BTB (POZ) domain containing 3                                                         | 0 |
| 755 | P59017 | Bcl2l13       | BCL2-like 13 (apoptosis facilitator)                                                  | 0 |
| 756 | P59110 | Senp1         | SUMO1/sentrin specific peptidase 1                                                    | 0 |
| 757 | P59530 | Tas2r130      | taste receptor, type 2, member 130                                                    | 0 |
| 758 | P59644 | Inpp5f1       | inositol polyphosphate 5-phosphatase J                                                | 0 |
| 759 | P59729 | Rin3          | Ras and Rab interactor 3                                                              | 0 |
| 760 | P59900 | Emilin3       | elastin microfibril interfacer 3                                                      | 0 |
| 761 | P60824 | Cirbp         | cold inducible RNA binding protein                                                    | 0 |
| 762 | P61329 | Fgf12         | fibroblast growth factor 12                                                           | 0 |
| 763 | P61460 | Depdc5        | DEP domain containing 5                                                               | 0 |
| 764 | P62204 | Calm3         | calmodulin 3                                                                          | 0 |
| 765 | P62806 | Hist2h4       | histone cluster 2, H4                                                                 | 0 |
| 766 | P62932 | Fbxo40        | F-box protein 40                                                                      | 0 |
| 767 | P63525 | Tmprss9       | transmembrane protease, serine 9                                                      | 0 |
| 768 | P70121 | Zhx1          | zinc fingers and homeoboxes 1                                                         | 0 |
| 769 | P70158 | Smpd13a       | sphingomyelin phosphodiesterase, acid-like 3A                                         | 0 |
| 770 | P70166 | Cpeb1         | cytoplasmic polyadenylation element binding protein 1                                 | 0 |
| 771 | P70170 | Abcc9         | ATP-binding cassette, sub-family C (CFTR/MRP), member 9                               | 0 |
| 772 | P70174 | IDBG-null     | histamine receptor H1                                                                 | 0 |
| 773 | P70193 | Lriq1         | leucine-rich repeats and immunoglobulin-like domains 1                                | 0 |
| 774 | P70261 | X99384        | cDNA sequence X99384                                                                  | 0 |
| 775 | P70313 | Nos3          | nitric oxide synthase 3, endothelial cell                                             | 0 |
| 776 | P70412 | Cuzo1         | CUB and zona pellucida-like domains 1                                                 | 0 |
| 777 | P70423 | Slc7a3        | solute carrier family 7 (cationic amino acid transporter, y+ system), member 3        | 0 |
| 778 | P83093 | Stim2         | stromal interaction molecule 2                                                        | 0 |
| 779 | P84228 | Hist1h3c      | histone cluster 1, H3c                                                                | 0 |
| 780 | P84309 | Adcy5         | adenylate cyclase 5                                                                   | 0 |
| 781 | P85442 | Voll3         | vestigial like 3 (Drosophila)                                                         | 0 |
| 782 | P97306 | Stac          | src homolog 3 (SH3) and cysteine rich domain                                          | 0 |
| 783 | P97324 | G6pd2         | glucose-6-phosphate dehydrogenase 2                                                   | 0 |
| 784 | P97325 | St3gal3       | ST3 beta-galactoside alpha-2,3-sialyltransferase 3                                    | 0 |
| 785 | P97371 | Psmc1         | proteasome (prosome, macropain) 28 subunit, alpha                                     | 0 |
| 786 | P97460 | Npas2         | neuronal PAS domain protein 2                                                         | 0 |
| 787 | P97742 | Cpt1a         | carnitine palmitoyltransferase 1a, liver                                              | 0 |
| 788 | P97819 | Pla2g6        | phospholipase A2, group VI                                                            | 0 |
| 789 | P98197 | Atp11a        | ATPase, class VI, type 11A                                                            | 0 |
| 790 | P98199 | Atp8b2        | ATPase, class I, type 8B, member 2                                                    | 0 |
| 791 | P98200 | Atp8a2        | ATPase, aminophospholipid transporter-like, class I, type 8A, member 2                | 0 |
| 792 | O01965 | Lv9           | lymphocyte antigen 9                                                                  | 0 |
| 793 | O02152 | Htr2b         | 5-hydroxytryptamine (serotonin) receptor 2B                                           | 0 |
| 794 | O02780 | Nfia          | nuclear factor I/A                                                                    | 0 |
| 795 | O03401 | Crisp1        | cysteine-rich secretory protein 1                                                     | 0 |
| 796 | O03517 | Scq2          | secretogranin II                                                                      | 0 |
| 797 | O03717 | Kcnc1         | potassium voltage gated channel, Shaw-related subfamily, member 1                     | 0 |
| 798 | O04857 | Col6a1        | collagen, type VI, alpha 1                                                            | 0 |
| 799 | O05722 | Col9a1        | collagen, type IX, alpha 1                                                            | 0 |
| 800 | O05910 | Adam8         | a disintegrin and metalloproteinase domain 8                                          | 0 |
| 801 | O05915 | Gch1          | GTP cyclohydrolase 1                                                                  | 0 |
| 802 | O05A36 | Mex3c         | mex3 homolog C (C. elegans)                                                           | 0 |
| 803 | O05D44 | Eif5b         | eukaryotic translation initiation factor 5B                                           | 0 |
| 804 | O07409 | Cntn3         | contactin 3                                                                           | 0 |
| 805 | O09M05 | Aqbl1         | ATP/GTP binding protein-like 1                                                        | 0 |
| 806 | O0KK55 | Kndc1         | kinase non-catalytic C-lobe domain (KIND) containing 1                                | 0 |
| 807 | O0KK59 | Unc79         | unc-79 homolog (C. elegans)                                                           | 0 |
| 808 | O0P5X5 | Zbx           | zinc finger, B-box domain containing                                                  | 0 |
| 809 | O0VBV7 | AK129341      | cDNA sequence AK129341                                                                | 0 |
| 810 | O0VND7 | Rundc1        | RUN domain containing 1                                                               | 0 |
| 811 | O0VE82 | Cpne7         | copine VII                                                                            | 0 |
| 812 | O0VGM9 | Rtel1         | regulator of telomere elongation helicase 1                                           | 0 |
| 813 | O149B8 | Z310042D19Rik | RIKEN cDNA Z310042D19 gene                                                            | 0 |
| 814 | O149L6 | Dnaib14       | DnaJ (Hsp40) homolog, subfamily B, member 14                                          | 0 |
| 815 | O149M0 | Clec12b       | C-type lectin domain family 12, member B                                              | 0 |
| 816 | O14AT2 | Tex11         | testis expressed gene 11                                                              | 0 |
| 817 | O14B89 | Map6d1        | MAP6 domain containing 1                                                              | 0 |
| 818 | O14CH0 | Fam171b       | family with sequence similarity 171, member B                                         | 0 |
| 819 | O14DH7 | Acsc3         | acyl-CoA synthetase short-chain family member 3                                       | 0 |

|     |        |               |                                                                             |   |
|-----|--------|---------------|-----------------------------------------------------------------------------|---|
| 820 | O14DL0 | Ubalnl        | ubiquilin-like                                                              | 0 |
| 821 | O1EG27 | Myc3b         | myosin IIIb                                                                 | 0 |
| 822 | O2EG98 | Pkd1l3        | polycystic kidney disease 1 like 3                                          | 0 |
| 823 | O2EY15 | Prtq          | protoenin homolog (Gallus gallus)                                           | 0 |
| 824 | O2M3X8 | Phactr1       | phosphatase and actin regulator 1                                           | 0 |
| 825 | O2TJ95 | Rspo3         | R-spondin 3 homolog (Xenopus laevis)                                        | 0 |
| 826 | O2VQ04 | Arnl12        | aryl hydrocarbon receptor nuclear translocator-like 2                       | 0 |
| 827 | O2XU92 | Acsbq2        | acyl-CoA synthetase bubbleum family member 2                                | 0 |
| 828 | O32Q92 | Acof6         | acyl-CoA thioesterase 6                                                     | 0 |
| 829 | O3TDD9 | IDBG-null     | KLR40 motif containing 1                                                    | 0 |
| 830 | O3TIU4 | Pde12         | phosphodiesterase 12                                                        | 0 |
| 831 | O3TJM4 | Cenpt         | centromere protein T                                                        | 0 |
| 832 | O3TNH5 | Fam172a       | family with sequence similarity 172, member A                               | 0 |
| 833 | O3TRR0 | Mtap9         | microtubule-associated protein 9                                            | 0 |
| 834 | O3TTE0 | Adam5         | a disintegrin and metallopeptidase domain 5                                 | 0 |
| 835 | O3TXU5 | Dhps          | deoxyhypusine synthase                                                      | 0 |
| 836 | O3TY60 | Fam131b       | family with sequence similarity 131, member B                               | 0 |
| 837 | O3TY86 | Alfm3         | apoptosis-inducing factor, mitochondrion-associated 3                       | 0 |
| 838 | O3TYS2 | BC017643      | cDNA sequence BC017643                                                      | 0 |
| 839 | O3TZX3 | Slc25a33      | solute carrier family 25, member 33                                         | 0 |
| 840 | O3TZZ7 | Esvt2         | extended synaptotagmin-like protein 2                                       | 0 |
| 841 | O3U0S6 | Rasip1        | Ras interacting protein 1                                                   | 0 |
| 842 | O3U1D9 | 1700029J07Rik | RIKEN cDNA 1700029J07 gene                                                  | 0 |
| 843 | O3U1V8 | Map3k9        | mitogen-activated protein kinase kinase kinase 9                            | 0 |
| 844 | O3U285 | Lcorl         | ligand dependent nuclear receptor corepressor-like                          | 0 |
| 845 | O3U2E2 | Zmvm5         | zinc finger, MYM-type 5                                                     | 0 |
| 846 | O3U2J3 | Fam150a2      | family with sequence similarity 160, member A2                              | 0 |
| 847 | O3U2J5 | 1700106N22Rik | RIKEN cDNA 1700106N22 gene                                                  | 0 |
| 848 | O3U5C8 | Arhgef16      | Rho guanine nucleotide exchange factor (GEF) 16                             | 0 |
| 849 | O3U962 | Col5a2        | collagen, type V, alpha 2                                                   | 0 |
| 850 | O3U9N9 | Slc16a10      | solute carrier family 16 (monocarboxylic acid transporters), member 10      | 0 |
| 851 | O3UC01 | Foxk2         | forkhead box K2                                                             | 0 |
| 852 | O3UEB3 | Puf60         | poly-U binding splicing factor 60                                           | 0 |
| 853 | O3UEG6 | Aqxt2         | alanine-glyoxylate aminotransferase 2                                       | 0 |
| 854 | O3UH53 | Sdk1          | sidekick homolog 1 (chicken)                                                | 0 |
| 855 | O3UH66 | Wnk2          | WNK lysine deficient protein kinase 2                                       | 0 |
| 856 | O3UHJ0 | Ask1          | AP2 associated kinase 1                                                     | 0 |
| 857 | O3UHK3 | Greb1         | gene regulated by estrogen in breast cancer protein                         | 0 |
| 858 | O3UHK6 | IDBG-null     | odd Oz/ten-m homolog 4 (Drosophila)                                         | 0 |
| 859 | O3UHX2 | Pdap1         | PDGFA associated protein 1                                                  | 0 |
| 860 | O3UHZ5 | Lmod2         | leiomodulin 2 (cardiac)                                                     | 0 |
| 861 | O3UJP5 | 2610301B20Rik | RIKEN cDNA 2610301B20 gene                                                  | 0 |
| 862 | O3UL97 | Atf7ip2       | activating transcription factor 7 interacting protein 2                     | 0 |
| 863 | O3ULM6 | Usp1          | ubiquitin specific peptidase like 1                                         | 0 |
| 864 | O3ULW6 | Ccdc33        | coiled-coil domain containing 33                                            | 0 |
| 865 | O3UME2 | 6030446N20Rik | RIKEN cDNA 6030446N20 gene                                                  | 0 |
| 866 | O3UMM4 | Cdk10         | cyclin-dependent kinase 10                                                  | 0 |
| 867 | O3UPR7 | Tmem102       | transmembrane protein 102                                                   | 0 |
| 868 | O3UQ22 | Ntn5          | netrin 5                                                                    | 0 |
| 869 | O3UR50 | Vwa5b2        | von Willebrand factor A domain containing 5B2                               | 0 |
| 870 | O3URF8 | Kctd21        | potassium channel tetramerisation domain containing 21                      | 0 |
| 871 | O3URQ0 | Tex10         | testis expressed gene 10                                                    | 0 |
| 872 | O3UTO7 | Prdm10        | PR domain containing 10                                                     | 0 |
| 873 | O3UUF8 | Ankrd34b      | ankyrin repeat domain 34B                                                   | 0 |
| 874 | O3UU07 | Pqap1         | post-GPI attachment to proteins 1                                           | 0 |
| 875 | O3UWM4 | Jhdm1d        | jumonji C domain-containing histone demethylase 1 homolog D (S. cerevisiae) | 0 |
| 876 | O3UX52 | Ccdc114       | coiled-coil domain containing 114                                           | 0 |
| 877 | O3UXL4 | Plk1s1        | polo-like kinase 1 substrate 1                                              | 0 |
| 878 | O3UZ18 | Nara2         | NMDA receptor-regulated gene 2                                              | 0 |
| 879 | O3V037 | Gm136         | predicted gene 136                                                          | 0 |
| 880 | O3V0C5 | Usp48         | ubiquitin specific peptidase 48                                             | 0 |
| 881 | O3V0G7 | Garnl3        | GTPase activating RANGAP domain-like 3                                      | 0 |
| 882 | O3V172 | Sel1l2        | sel-1 suppressor of lin-12-like 2 (C. elegans)                              | 0 |
| 883 | O3V1D3 | Ampd1         | adenosine monophosphate deaminase 1                                         | 0 |
| 884 | O3V1D5 | Pnpla1        | patatin-like phospholipase domain containing 1                              | 0 |
| 885 | O3V384 | Lace1         | lactation elevated 1                                                        | 0 |
| 886 | O3V3K7 | Ccm7          | glucosaminyl (N-acetyl) transferase family member 7                         | 0 |
| 887 | O3V3R1 | IDBG-null     | methylene tetrahydrofolate dehydrogenase (NADP+ dependent) 1-like           | 0 |
| 888 | O3ZN08 | 2810453I06Rik | RIKEN cDNA 2810453I06 gene                                                  | 0 |
| 889 | O4FZ07 | Plk5          | polo-like kinase 5 (Drosophila)                                             | 0 |
| 890 | O4FZF3 | Ddx49         | DEAD (Asp-Glu-Ala-Asp) box polypeptide 49                                   | 0 |
| 891 | O4FZG9 | Ndufa4l2      | NADH dehydrogenase (ubiquinone) 1 alpha subcomplex, 4-like 2                | 0 |
| 892 | O4LDD4 | Arap1         | ArfGAP with RhoGAP domain, ankyrin repeat and PH domain 1                   | 0 |
| 893 | O4VAA7 | Sinx33        | sorting nexin 33                                                            | 0 |
| 894 | O501J7 | Phactr4       | phosphatase and actin regulator 4                                           | 0 |
| 895 | O505D9 | Trim67        | tripartite motif-containing 67                                              | 0 |
| 896 | O505G8 | Zfp827        | zinc finger protein 827                                                     | 0 |
| 897 | O505K2 | Fam160a1      | family with sequence similarity 160, member A1                              | 0 |
| 898 | O50L42 | Pla2q4e       | phospholipase A2, group IVE                                                 | 0 |
| 899 | O50L43 | Pla2q4d       | phospholipase A2, group IVD                                                 | 0 |
| 900 | O52KE7 | Ccnl1         | cyclin L1                                                                   | 0 |
| 901 | O52KR2 | Lriq2         | leucine-rich repeats and immunoglobulin-like domains 2                      | 0 |
| 902 | O562E2 | Kctd19        | potassium channel tetramerisation domain containing 19                      | 0 |
| 903 | O5BL07 | Pex1          | peroxisomal biogenesis factor 1                                             | 0 |
| 904 | O5DTI8 | Esvt3         | extended synaptotagmin-like protein 3                                       | 0 |
| 905 | O5DTJ9 | Mypn          | myopalladin                                                                 | 0 |
| 906 | O5DTK1 | Chsy3         | chondroitin sulfate synthase 3                                              | 0 |
| 907 | O5DTT8 | Pnma5         | paraneoplastic antigen family 5                                             | 0 |
| 908 | O5DTZ0 | Nynrin        | NYN domain and retroviral integrase containing                              | 0 |
| 909 | O5DU00 | Dcdc2a        | doublecortin domain containing 2a                                           | 0 |
| 910 | O5DU05 | Cep164        | centrosomal protein 164                                                     | 0 |
| 911 | O5DU09 | Zfp652        | zinc finger protein 652                                                     | 0 |
| 912 | O5DU56 | Nlrc3         | NLR family, CARD domain containing 3                                        | 0 |
| 913 | O5EBP3 | Armc5         | armadillo repeat containing 5                                               | 0 |
| 914 | O5F2E7 | Nuflp2        | nuclear fragile X mental retardation protein interacting protein 2          | 0 |
| 915 | O5F2E8 | Taok1         | TAO kinase 1                                                                | 0 |
| 916 | O5FWI2 | Scfr          | secretin receptor                                                           | 0 |
| 917 | O5GH64 | Xkr7          | X Kell blood group precursor related family member 7 homolog                | 0 |
| 918 | O5H8B9 | Frem3         | Fras1 related extracellular matrix protein 3                                | 0 |
| 919 | O5HZJ0 | Drosha        | drosha, ribonuclease type III                                               | 0 |
| 920 | O5I043 | Usp28         | ubiquitin specific peptidase 28                                             | 0 |
| 921 | O5M9N4 | Plqh          | phosphatidylinositol glycan anchor biosynthesis, class H                    | 0 |
| 922 | O5NCH9 | Grm6          | glutamate receptor, metabotropic 6                                          | 0 |
| 923 | O5NCX5 | Neur14        | neuronalized homolog 4 (Drosophila)                                         | 0 |
| 924 | O5PR68 | Ccdc46        | coiled-coil domain containing 46                                            | 0 |
| 925 | O5RI75 | Rasef         | RAS and EF hand domain containing                                           | 0 |
| 926 | O5RKZ7 | Mocs1         | molybdenum cofactor synthesis 1                                             | 0 |
| 927 | O5SDA5 | Gucy2f        | guanylate cyclase 2f                                                        | 0 |
| 928 | O5SFM8 | Rbm27         | RNA binding motif protein 27                                                | 0 |
| 929 | O5SPW0 | Vps54         | vacuolar protein sorting 54 (yeast)                                         | 0 |
| 930 | O5SPX1 | Ccdc157       | coiled-coil domain containing 157                                           | 0 |
| 931 | O5SOX6 | Cyfp2         | cytoplasmic FMR1 interacting protein 2                                      | 0 |
| 932 | O5SS91 | IDBG-null     | Sad1 and UNC84 domain containing 3                                          | 0 |
| 933 | O5SSZ7 | Znrf3         | zinc and ring finger 3                                                      | 0 |
| 934 | O5SU45 | Mvos1a        | myosin 1G                                                                   | 0 |
| 935 | O5SUV1 | Rsad1         | radical S-adenosyl methionine domain containing 1                           | 0 |
| 936 | O5SUV2 | Mycbpap       | MYCBP associated protein                                                    | 0 |
| 937 | O5SW25 | Pom121i2      | POM121 membrane glycoprotein-like 2 (rat)                                   | 0 |
| 938 | O5SW75 | Ssh2          | slingshot homolog 2 (Drosophila)                                            | 0 |

|      |        |               |                                                                                          |   |
|------|--------|---------------|------------------------------------------------------------------------------------------|---|
| 939  | O55XA9 | Wwc1          | WW, C2 and coiled-coil domain containing 1                                               | 0 |
| 940  | O5U4C9 | Dyrk2         | dual-specificity tyrosine-(Y)-phosphorylation regulated kinase 2                         | 0 |
| 941  | O5XF90 | Atp13a4       | ATPase type 13A4                                                                         | 0 |
| 942  | O5Y4Y6 | Gsdma3        | gasdermin A3                                                                             | 0 |
| 943  | O60604 | Scin          | scinderin                                                                                | 0 |
| 944  | O60764 | Mkrn3         | makorin, ring finger protein, 3                                                          | 0 |
| 945  | O60846 | Tnfrsf8       | tumor necrosis factor receptor superfamily, member 8                                     | 0 |
| 946  | O61017 | Gnat2         | guanine nucleotide binding protein (G protein), gamma transducing activity polypeptide 2 | 0 |
| 947  | O61035 | Hars          | histidyl-tRNA synthetase                                                                 | 0 |
| 948  | O61087 | Lamb3         | laminin, beta 3                                                                          | 0 |
| 949  | O61151 | Pop2r5e       | protein phosphatase 2, regulatory subunit B (B56), epsilon isoform                       | 0 |
| 950  | O61161 | Map4k2        | mitogen-activated protein kinase kinase kinase kinase 2                                  | 0 |
| 951  | O61183 | IDBG-null     | poly (A) polymerase alpha                                                                | 0 |
| 952  | O61194 | Pik3c2a       | phosphatidylinositol 3-kinase, C2 domain containing, alpha polypeptide                   | 0 |
| 953  | O61282 | Acan          | aggrecan                                                                                 | 0 |
| 954  | O61474 | Msi1          | Musashi homolog 1 (Drosophila)                                                           | 0 |
| 955  | O61575 | IDBG-null     | forkhead box N1                                                                          | 0 |
| 956  | O61606 | Gcgr          | glucagon receptor                                                                        | 0 |
| 957  | O61663 | Tlx2          | T-cell leukemia, homeobox 2                                                              | 0 |
| 958  | O61703 | Itih2         | inter-leukin trypsin inhibitor, heavy chain 2                                            | 0 |
| 959  | O61806 | Xlr3c         | X-linked lymphocyte-regulated 3C                                                         | 0 |
| 960  | O61818 | Rai1          | retinoic acid induced 1                                                                  | 0 |
| 961  | O61923 | Kcna6         | potassium voltage-gated channel, shaker-related, subfamily, member 6                     | 0 |
| 962  | O62009 | Postn         | periostin, osteoblast specific factor                                                    | 0 |
| 963  | O62148 | Aldh1a2       | aldehyde dehydrogenase family 1, subfamily A2                                            | 0 |
| 964  | O62234 | Mvom1         | myomesin 1                                                                               | 0 |
| 965  | O62271 | Ddr2          | discoidin domain receptor family, member 2                                               | 0 |
| 966  | O62513 | Zfp260        | zinc finger protein 260                                                                  | 0 |
| 967  | O63886 | Uqt1a1        | UDP glucuronosyltransferase 1 family, polypeptide A1                                     | 0 |
| 968  | O63912 | Oma           | oligodendrocyte myelin glycoprotein                                                      | 0 |
| 969  | O64018 | Gira1         | glycine receptor, alpha 1 subunit                                                        | 0 |
| 970  | O640M1 | Utp14a        | UTP14, U3 small nucleolar ribonucleoprotein, homolog A (yeast)                           | 0 |
| 971  | O64338 | Pde1c         | phosphodiesterase 1C                                                                     | 0 |
| 972  | O64362 | Aktip         | thymoma viral proto-oncogene 1 interacting protein                                       | 0 |
| 973  | O64691 | Capn3         | calpain 3                                                                                | 0 |
| 974  | O64704 | IDBG-null     | svptaxin 3                                                                               | 0 |
| 975  | O64705 | Plekha5       | pleckstrin homology domain containing, family G (with RhoGef domain) member 5            | 0 |
| 976  | O66X05 | Nlrp4f        | NLR family, pyrin domain containing 4F                                                   | 0 |
| 977  | O66X22 | Nlrp9b        | NLR family, pyrin domain containing 9B                                                   | 0 |
| 978  | O673H1 | Tusc1         | tumor suppressor candidate 1                                                             | 0 |
| 979  | O67B34 | A4qalt        | alpha 1,4-galactosyltransferase                                                          | 0 |
| 980  | O67BT3 | Slc13a5       | solute carrier family 13 (sodium-dependent citrate transporter), member 5                | 0 |
| 981  | O68FF7 | Slain1        | SLAIN motif family, member 1                                                             | 0 |
| 982  | O68FL4 | Ahcy12        | S-adenosylhomocysteine hydrolase-like 2                                                  | 0 |
| 983  | O68FM6 | Eifm2         | leucine rich repeat and fibronectin type III, extracellular 2                            | 0 |
| 984  | O69237 | IDBG-null     | sterile alpha motif domain containing 9-like                                             | 0 |
| 985  | O69283 | Tspv15        | testis-specific protein, Y-encoded-like 5                                                | 0 |
| 986  | O69Z88 | Zcchc2        | zinc finger, CCHC domain containing 2                                                    | 0 |
| 987  | O69Z01 | AI464131      | expressed sequence AI464131                                                              | 0 |
| 988  | O69Z88 | Ablim3        | actin binding LIM protein family, member 3                                               | 0 |
| 989  | O6A058 | Armcx2        | armadillo repeat containing, X-linked 2                                                  | 0 |
| 990  | O6A085 | Zfp629        | zinc finger protein 629                                                                  | 0 |
| 991  | O6A0D4 | Rftn1         | raftlin lipid raft linker 1                                                              | 0 |
| 992  | O6BCL1 | Pram1         | PML-RAR alpha-regulated adaptor molecule 1                                               | 0 |
| 993  | O6DFV8 | Vwde          | von Willebrand factor D and EGF domains                                                  | 0 |
| 994  | O6DFW0 | 3110043021Rik | RIKEN cDNA 3110043021 gene                                                               | 0 |
| 995  | O6D185 | Fastk1        | FAST kinase domains 1                                                                    | 0 |
| 996  | O6D194 | 0610007P08Rik | RIKEN cDNA 0610007P08 gene                                                               | 0 |
| 997  | O6D185 | IDBG-null     | multiple EGF-like-domains 10                                                             | 0 |
| 998  | O6D1D5 | Mum1          | melanoma associated antigen (mutated) 1                                                  | 0 |
| 999  | O6EBV9 | Atg9b         | ATG9 autophagy related 9 homolog B (S. cerevisiae)                                       | 0 |
| 1000 | O6GOV1 | Fam196b       | family with sequence similarity 196, member B                                            | 0 |
| 1001 | O6GOV7 | 2700050L05Rik | RIKEN cDNA 2700050L05 gene                                                               | 0 |
| 1002 | O6GOX6 | Anks6         | ankyrin repeat and sterile alpha motif domain containing 6                               | 0 |
| 1003 | O6GV12 | Kdsr          | 3-ketodihydroshiquosine reductase                                                        | 0 |
| 1004 | O6IEE6 | Tmem132e      | transmembrane protein 132E                                                               | 0 |
| 1005 | O6J9G1 | Slyk1         | serine/threonine/tyrosine kinase 1                                                       | 0 |
| 1006 | O6KAU7 | Plekha2       | pleckstrin homology domain containing, family G (with RhoGef domain) member 2            | 0 |
| 1007 | O6NS45 | Ccdc66        | coiled-coil domain containing 66                                                         | 0 |
| 1008 | O6NS52 | Dakb          | diacylglycerol kinase, beta                                                              | 0 |
| 1009 | O6NVE8 | Wdr44         | WD repeat domain 44                                                                      | 0 |
| 1010 | O6NZG4 | 4632434111Rik | RIKEN cDNA 4632434111 gene                                                               | 0 |
| 1011 | O6P1B1 | Xpnpep1       | X-prolyl aminopeptidase (aminopeptidase P) 1, soluble                                    | 0 |
| 1012 | O6P1C6 | Lria3         | leucine-rich repeats and immunoglobulin-like domains 3                                   | 0 |
| 1013 | O6P205 | Xlr3b         | X-linked lymphocyte-regulated 3B                                                         | 0 |
| 1014 | O6P2K3 | 4930452B06Rik | RIKEN cDNA 4930452B06 gene                                                               | 0 |
| 1015 | O6P2K6 | Smek1         | SMEK homolog 1, suppressor of mek1 (Dictyostelium)                                       | 0 |
| 1016 | O6P4T0 | Ata2a         | ATG2 autophagy related 2 homolog A (S. cerevisiae)                                       | 0 |
| 1017 | O6P580 | Rrp12         | ribosomal RNA processing 12 homolog (S. cerevisiae)                                      | 0 |
| 1018 | O6P5G3 | Mbt1          | mbt domain containing 1                                                                  | 0 |
| 1019 | O6P5U7 | 3110047P20Rik | RIKEN cDNA 3110047P20 gene                                                               | 0 |
| 1020 | O6P7W5 | Tsen2         | tRNA splicing endonuclease 2 homolog (S. cerevisiae)                                     | 0 |
| 1021 | O6P8G8 | Orai3         | ORAI calcium release-activated calcium modulator 3                                       | 0 |
| 1022 | O6P9J9 | Ano6          | anoctamin 6                                                                              | 0 |
| 1023 | O6P9O4 | Fhod1         | formin homology 2 domain containing 1                                                    | 0 |
| 1024 | O6PAL1 | 2610109H07Rik | RIKEN cDNA 2610109H07 gene                                                               | 0 |
| 1025 | O6PCM2 | Ints6         | integrator complex subunit 6                                                             | 0 |
| 1026 | O6PDC0 | Rundc3b       | RUN domain containing 3B                                                                 | 0 |
| 1027 | O6PE13 | Prrt3         | proline-rich transmembrane protein 3                                                     | 0 |
| 1028 | O6PFD6 | Kif18b        | kinesin family member 18B                                                                | 0 |
| 1029 | O6PGG2 | Gmp1          | Gem-interacting protein                                                                  | 0 |
| 1030 | O6PGH2 | Hn1l          | hematological and neurological expressed 1-like                                          | 0 |
| 1031 | O6Q2Z6 | Acot5         | acyl-CoA thioesterase 5                                                                  | 0 |
| 1032 | O6TL19 | Gucy2g        | guanylate cyclase 2g                                                                     | 0 |
| 1033 | O6V3W6 | Ccdc135       | coiled-coil domain containing 135                                                        | 0 |
| 1034 | O6V5K9 | Zfp474        | zinc finger protein 474                                                                  | 0 |
| 1035 | O6VWV9 | Cyp2r1        | cytochrome P450, family 2, subfamily r, polypeptide 1                                    | 0 |
| 1036 | O6X632 | Gpr75         | G protein-coupled receptor 75                                                            | 0 |
| 1037 | O6X7S9 | Eid2          | EP300 interacting inhibitor of differentiation 2                                         | 0 |
| 1038 | O6XUX1 | Dstyk         | dual serine/threonine and tyrosine protein kinase                                        | 0 |
| 1039 | O6ZPE2 | Sbf1          | SET binding factor 1                                                                     | 0 |
| 1040 | O6ZPF4 | Fmnl3         | formin-like 3                                                                            | 0 |
| 1041 | O6ZPG2 | Wdr90         | WD repeat domain 90                                                                      | 0 |
| 1042 | O6ZPI3 | Lcor          | ligand dependent nuclear receptor corepressor                                            | 0 |
| 1043 | O6ZPR4 | Kcnt1         | potassium channel, subfamily T, member 1                                                 | 0 |
| 1044 | O6ZOS8 | Larp1         | La ribonucleoprotein domain family, member 1                                             | 0 |
| 1045 | O6ZQ46 | Iosf3         | immunoglobulin superfamily, member 3                                                     | 0 |
| 1046 | O6ZO13 | Mlec          | mallelectin                                                                              | 0 |
| 1047 | O6ZWN5 | Rps9          | ribosomal protein S9                                                                     | 0 |
| 1048 | O6ZWY9 | Hist1h2bc     | histone cluster 1, H2bc                                                                  | 0 |
| 1049 | O71B07 | Dpy19l3       | dpy-19-like 3 (C. elegans)                                                               | 0 |
| 1050 | O76125 | Mettl7a2      | methyltransferase like 7A2                                                               | 0 |
| 1051 | O76KJ5 | Cd3eap        | CD3E antigen, epsilon polypeptide associated protein                                     | 0 |
| 1052 | O78PY7 | Snd1          | staphylococcal nuclease and tudor domain containing 1                                    | 0 |
| 1053 | O7M6Y3 | Picalm        | phosphatidylinositol binding clathrin assembly protein                                   | 0 |
| 1054 | O7TMV3 | Fastkd5       | FAST kinase domains 5                                                                    | 0 |
| 1055 | O7TN12 | 5730559C18Rik | RIKEN cDNA 5730559C18 gene                                                               | 0 |
| 1056 | O7TN33 | Celf6         | CUGBP, Elav-like family member 6                                                         | 0 |
| 1057 | O7TNM2 | Trim46        | tripartite motif-containing 46                                                           | 0 |

|      |        |               |                                                                                                                                       |   |
|------|--------|---------------|---------------------------------------------------------------------------------------------------------------------------------------|---|
| 1058 | O7TPM9 | Mtmr10        | myotubularin related protein 10                                                                                                       | 0 |
| 1059 | O7TPN9 | IDBG-null     | proline rich 14                                                                                                                       | 0 |
| 1060 | O7TO32 | Hfe2          | hemochromatosis type 2 (juvenile) (human homolog)                                                                                     | 0 |
| 1061 | O7TO65 | Tmc4          | transmembrane channel-like gene family 4                                                                                              | 0 |
| 1062 | O7TOA5 | Tas2r139      | taste receptor, type 2, member 139                                                                                                    | 0 |
| 1063 | O7TOA8 | Tas2r136      | taste receptor, type 2, member 136                                                                                                    | 0 |
| 1064 | O7TOH7 | Lrp10         | low-density lipoprotein receptor-related protein 10                                                                                   | 0 |
| 1065 | O7TOI7 | Abtb2         | ankyrin repeat and BTB (POZ) domain containing 2                                                                                      | 0 |
| 1066 | O7TOK1 | Ints7         | integrator complex subunit 7                                                                                                          | 0 |
| 1067 | O7TS48 | Olf1r180      | olfactory receptor 180                                                                                                                | 0 |
| 1068 | O7TSA6 | BC053749      | cDNA sequence BC053749                                                                                                                | 0 |
| 1069 | O7TSC3 | Nek5          | NIMA (never in mitosis gene a)-related expressed kinase 5                                                                             | 0 |
| 1070 | O7TSF4 | BC046404      | cDNA sequence BC046404                                                                                                                | 0 |
| 1071 | O7TSN6 | Gpr151        | G protein-coupled receptor 151                                                                                                        | 0 |
| 1072 | O7TST5 | Lamp3         | lysosomal-associated membrane protein 3                                                                                               | 0 |
| 1073 | O7TT15 | Wbscr17       | Williams-Beuren syndrome chromosome region 17 homolog (human)                                                                         | 0 |
| 1074 | O7TT23 | 4930402H24Rik | RIKEN cDNA 4930402H24 gene                                                                                                            | 0 |
| 1075 | O7TTS2 | Pop1r14d      | protein phosphatase 1, regulatory (inhibitor) subunit 14D                                                                             | 0 |
| 1076 | O80SW1 | Ahcy1         | S-adenosylhomocysteine hydrolase-like 1                                                                                               | 0 |
| 1077 | O80SZ7 | Gna5          | guanine nucleotide binding protein (G protein), gamma 5                                                                               | 0 |
| 1078 | O80T03 | Muc6          | mucin 6, gastric                                                                                                                      | 0 |
| 1079 | O80T62 | Gpr101        | G protein-coupled receptor 101                                                                                                        | 0 |
| 1080 | O80T87 | Zswim6        | zinc finger, SWIM domain containing 6                                                                                                 | 0 |
| 1081 | O80TD3 | Fniip2        | folliculin interacting protein 2                                                                                                      | 0 |
| 1082 | O80TG1 | IDBG-null     | RIKEN cDNA 1700081L11 gene                                                                                                            | 0 |
| 1083 | O80TJ7 | Phf8          | PHD finger protein 8                                                                                                                  | 0 |
| 1084 | O80TL1 | Adev2         | adenylate cyclase 2                                                                                                                   | 0 |
| 1085 | O80TL7 | Mon2          | MON2 homolog (yeast)                                                                                                                  | 0 |
| 1086 | O80TS3 | IDBG-null     | latrophilin 3                                                                                                                         | 0 |
| 1087 | O80T57 | Ddn           | dendrin                                                                                                                               | 0 |
| 1088 | O80TT2 | Baiap3        | BAI1-associated protein 3                                                                                                             | 0 |
| 1089 | O80U95 | Ube3c         | ubiquitin protein ligase E3C                                                                                                          | 0 |
| 1090 | O80UK8 | Ints2         | integrator complex subunit 2                                                                                                          | 0 |
| 1091 | O80UU9 | Pqrmc2        | progesterone receptor membrane component 2                                                                                            | 0 |
| 1092 | O80UZ0 | Fcd5          | FYVE, RhoGEF and PH domain containing 5                                                                                               | 0 |
| 1093 | O80V72 | Ipk2k         | inositol hexaphosphate kinase 2                                                                                                       | 0 |
| 1094 | O80VA5 | Sh3c2         | SH3 domain and tetrapeptide repeats 2                                                                                                 | 0 |
| 1095 | O80VL1 | Tdrkh         | tudor and KH domain containing protein                                                                                                | 0 |
| 1096 | O80VN0 | Ccdc37        | coiled-coil domain containing 37                                                                                                      | 0 |
| 1097 | O80W32 | Icca          | IQ motif containing G                                                                                                                 | 0 |
| 1098 | O80W49 | Cryba3        | beta-gamma crystallin domain containing 3                                                                                             | 0 |
| 1099 | O80WM4 | Hapln4        | hyaluronan and proteoglycan link protein 4                                                                                            | 0 |
| 1100 | O80WT0 | Jph4          | junctophilin 4                                                                                                                        | 0 |
| 1101 | O80WV3 | Chst2         | carbohydrate sulfotransferase 2                                                                                                       | 0 |
| 1102 | O80WV7 | IDBG-null     | serine/arginine repetitive matrix 3                                                                                                   | 0 |
| 1103 | O80X60 | Efcab3        | EF-hand calcium binding domain 3                                                                                                      | 0 |
| 1104 | O80XC3 | IDBG-null     | USP6 N-terminal like                                                                                                                  | 0 |
| 1105 | O80X14 | Pip4k2b       | phosphatidylinositol-5-phosphate 4-kinase, type II, beta                                                                              | 0 |
| 1106 | O80X17 | Bpifb9a       | BPI fold containing family B, member 9A                                                                                               | 0 |
| 1107 | O80XP8 | Fam76b        | family with sequence similarity 76, member B                                                                                          | 0 |
| 1108 | O80Y56 | Zfyve20       | zinc finger, FYVE domain containing 20                                                                                                | 0 |
| 1109 | O80YR3 | 2810030E01Rik | RIKEN cDNA 2810030E01 gene                                                                                                            | 0 |
| 1110 | O80YR9 | Rbm12b        | RNA binding motif protein 12B                                                                                                         | 0 |
| 1111 | O80Z10 | Astn2         | astroctactin 2                                                                                                                        | 0 |
| 1112 | O80Z60 | IDBG-null     | endothelin converting enzyme 2                                                                                                        | 0 |
| 1113 | O80ZD9 | Amigo2        | adhesion molecule with Ig like domain 2                                                                                               | 0 |
| 1114 | O80ZF8 | Bai3          | brain-specific angiogenesis inhibitor 3                                                                                               | 0 |
| 1115 | O80Z17 | Snx32         | sorting nexin 32                                                                                                                      | 0 |
| 1116 | O80ZX8 | Spaq1         | sperm associated antigen 1                                                                                                            | 0 |
| 1117 | O810C0 | Slitk2        | SLIT and NTRK-like family, member 2                                                                                                   | 0 |
| 1118 | O811B1 | Xylt1         | xylosyltransferase 1                                                                                                                  | 0 |
| 1119 | O811C2 | Ata4c         | autophagy-related 4C (yeast)                                                                                                          | 0 |
| 1120 | O811J3 | Ireb2         | iron responsive element binding protein 2                                                                                             | 0 |
| 1121 | O8BFR2 | Fstl5         | folliculin-like 5                                                                                                                     | 0 |
| 1122 | O8BFR5 | Tufm          | Tu translation elongation factor, mitochondrial                                                                                       | 0 |
| 1123 | O8BFJ3 | Rnf214        | ring finger protein 214                                                                                                               | 0 |
| 1124 | O8BG15 | Ctda92        | CTD (carboxy-terminal domain, RNA polymerase II, polypeptide A) small phosphatase like 2                                              | 0 |
| 1125 | O8BG22 | Clca5         | chloride channel calcium activated 5                                                                                                  | 0 |
| 1126 | O8BG34 | IDBG-null     | UBX domain protein 10                                                                                                                 | 0 |
| 1127 | O8BG39 | Sv2b          | synaptic vesicle glycoprotein 2 b                                                                                                     | 0 |
| 1128 | O8BG93 | Nudt15        | nudix (nucleoside diphosphate linked moiety X)-type motif 15                                                                          | 0 |
| 1129 | O8BG82 | Ttc7          | tetrapeptide repeat domain 7                                                                                                          | 0 |
| 1130 | O8BGF7 | IDBG-null     | PAN2 polyA specific ribonuclease subunit homolog (S. cerevisiae)                                                                      | 0 |
| 1131 | O8BGG9 | Acnat2        | acyl-coenzyme A amino acid N-acyltransferase 2                                                                                        | 0 |
| 1132 | O8BGM5 | Best2         | bestrophin 2                                                                                                                          | 0 |
| 1133 | O8BGR2 | Lrrc8d        | leucine rich repeat containing 8D                                                                                                     | 0 |
| 1134 | O8BGK7 | 2310008H04Rik | RIKEN cDNA 2310008H04 gene                                                                                                            | 0 |
| 1135 | O8BH05 | Zfp750        | zinc finger protein 750                                                                                                               | 0 |
| 1136 | O8BH15 | Cnot10        | CCR4-NOT transcription complex, subunit 10                                                                                            | 0 |
| 1137 | O8BH48 | Uba1          | ubiquitin-associated protein 1                                                                                                        | 0 |
| 1138 | O8BH50 | 8030462N17Rik | RIKEN cDNA 8030462N17 gene                                                                                                            | 0 |
| 1139 | O8BHE4 | Tmem108       | transmembrane protein 108                                                                                                             | 0 |
| 1140 | O8BHN1 | Txlnq         | taxilin gamma                                                                                                                         | 0 |
| 1141 | O8BHS8 | Sybu          | syntabulin (syntaxin-interacting)                                                                                                     | 0 |
| 1142 | O8BI79 | Ccdc40        | coiled-coil domain containing 40                                                                                                      | 0 |
| 1143 | O8BIR2 | Aste1         | asteroid homolog 1 (Drosophila)                                                                                                       | 0 |
| 1144 | O8BIV7 | Sic45a1       | solute carrier family 45, member 1                                                                                                    | 0 |
| 1145 | O8BIX9 | Ficd          | FIC domain containing                                                                                                                 | 0 |
| 1146 | O8BJ05 | Zc3h14        | zinc finger CCCH type containing 14                                                                                                   | 0 |
| 1147 | O8BJ63 | Mudena        | MU-2/AP1M2 domain containing, death-inducing                                                                                          | 0 |
| 1148 | O8BJA2 | Sic41a1       | solute carrier family 41, member 1                                                                                                    | 0 |
| 1149 | O8BJH1 | IDBG-null     | family with sequence similarity 164, member A                                                                                         | 0 |
| 1150 | O8BJM7 | Tyw1          | tRNA-yW synthesizing protein 1 homolog (S. cerevisiae)                                                                                | 0 |
| 1151 | O8BKC8 | Pi4kb         | phosphatidylinositol 4-kinase, catalytic, beta polypeptide                                                                            | 0 |
| 1152 | O8BKF1 | Polrmt        | polymerase (RNA) mitochondrial (DNA directed)                                                                                         | 0 |
| 1153 | O8BKU8 | Tmem87b       | transmembrane protein 87B                                                                                                             | 0 |
| 1154 | O8BLF2 | Cdk3          | cyclin-dependent kinase-like 3                                                                                                        | 0 |
| 1155 | O8BLX7 | IDBG-null     | collagen, type XVI, alpha 1                                                                                                           | 0 |
| 1156 | O8BM13 | Olfm2         | olfactomedin 2                                                                                                                        | 0 |
| 1157 | O8BM55 | Tmem214       | transmembrane protein 214                                                                                                             | 0 |
| 1158 | O8BM65 | 9430031J16Rik | RIKEN cDNA 9430031J16 gene                                                                                                            | 0 |
| 1159 | O8BM96 | Gpr128        | G protein-coupled receptor 128                                                                                                        | 0 |
| 1160 | O8BMA3 | Cnksr3        | Cnksr family member 3                                                                                                                 | 0 |
| 1161 | O8BMC4 | 2610027L16Rik | RIKEN cDNA 2610027L16 gene                                                                                                            | 0 |
| 1162 | O8BM14 | Gen1          | Gen homolog 1, endonuclease (Drosophila)                                                                                              | 0 |
| 1163 | O8BM51 | Hadha         | hydroxyacyl-Coenzyme A dehydrogenase/3-ketoacyl-Coenzyme A thiolase/enoyl-Coenzyme A hydratase (trifunctional protein), alpha subunit | 0 |
| 1164 | O8BN04 | Ddx26b        | DEAD/H (Asp-Glu-Ala-Asp/His) box polypeptide 26B                                                                                      | 0 |
| 1165 | O8BNV1 | Tm22a         | TRM2 tRNA methyltransferase 2 homolog A (S. cerevisiae)                                                                               | 0 |
| 1166 | O8BPE4 | Tmem177       | transmembrane protein 177                                                                                                             | 0 |
| 1167 | O8BQ47 | Cnpy4         | canopy 4 homolog (zebrafish)                                                                                                          | 0 |
| 1168 | O8BQM4 | Heatr3        | HEAT repeat containing 3                                                                                                              | 0 |
| 1169 | O8BQM9 | Med12l        | mediator of RNA polymerase II transcription, subunit 12 homolog (yeast)-like                                                          | 0 |
| 1170 | O8BR92 | Palm2         | paralectin 2                                                                                                                          | 0 |
| 1171 | O8BRB7 | Myst4         | MYST histone acetyltransferase monocytic leukemia 4                                                                                   | 0 |
| 1172 | O8BSD5 | She           | src homolog 2 domain-containing transforming protein E                                                                                | 0 |
| 1173 | O8BT18 | 3632451O06Rik | RIKEN cDNA 3632451O06 gene                                                                                                            | 0 |
| 1174 | O8BT76 | Dieaf         | digestive organ expansion factor homolog (zebrafish)                                                                                  | 0 |
| 1175 | O8BU51 | Bpifb6        | BPI fold containing family B, member 6                                                                                                | 0 |
| 1176 | O8BU13 | Lrwd1         | leucine-rich repeats and WD repeat domain containing 1                                                                                | 0 |



|      |        |               |                                                                                             |   |
|------|--------|---------------|---------------------------------------------------------------------------------------------|---|
| 1177 | O8BU6  | IDBG-null     | pleckstrin homolog domain containing, family A (phosphoinositide binding specific) member 1 | 0 |
| 1178 | O8BV4  | Odr           | quinoid dihydropteridine reductase                                                          | 0 |
| 1179 | O8BV7  | Als2cr12      | amvotrophic lateral sclerosis 2 (juvenile) chromosome region, candidate 12 (human)          | 0 |
| 1180 | O8BV7  | Sic25a41      | solute carrier family 25, member 41                                                         | 0 |
| 1181 | O8BVU5 | Nudt9         | nudix (nucleoside diphosphate linked moiety X)-type motif 9                                 | 0 |
| 1182 | O8WB1  | Synpo2l       | synaptopodin 2-like                                                                         | 0 |
| 1183 | O8BW64 | D63003M21Rik  | RIKEN cDNA D63003M21 gene                                                                   | 0 |
| 1184 | O8BWJ3 | Phka2         | phosphorylase kinase alpha 2                                                                | 0 |
| 1185 | O8BWM0 | Ptoes2        | prostaglandin E synthase 2                                                                  | 0 |
| 1186 | O8BWQ4 | Ftsid1        | FtsJ methyltransferase domain containing 1                                                  | 0 |
| 1187 | O8BWR4 | Usp40         | ubiquitin specific peptidase 40                                                             | 0 |
| 1188 | O8BWT5 | Dip2a         | DIP2 disco-interacting protein 2 homolog A (Drosophila)                                     | 0 |
| 1189 | O8BWW4 | Larp4         | La ribonucleoprotein domain family, member 4                                                | 0 |
| 1190 | O8BK4  | B630005N14Rik | RIKEN cDNA B630005N14 gene                                                                  | 0 |
| 1191 | O8BX06 | 2010111101Rik | RIKEN cDNA 2010111101 gene                                                                  | 0 |
| 1192 | O8BY35 | Fcd2          | FYVE, RhoGEF and PH domain containing 2                                                     | 0 |
| 1193 | O8BY89 | IDBG-null     | solute carrier family 44, member 2                                                          | 0 |
| 1194 | O8BY18 | 8430419L09Rik | RIKEN cDNA 8430419L09 gene                                                                  | 0 |
| 1195 | O8BYW1 | Arhaop25      | Rho GTPase activating protein 25                                                            | 0 |
| 1196 | O8BZ52 | Fsd2          | fibronectin type III and SPRY domain containing 2                                           | 0 |
| 1197 | O8BZ97 | Prdm8         | PR domain containing 8                                                                      | 0 |
| 1198 | O8BZM0 | Klhl12        | kelch-like 12 (Drosophila)                                                                  | 0 |
| 1199 | O8BZW2 | Ankrd56       | ankyrin repeat domain 56                                                                    | 0 |
| 1200 | O8C0E3 | Trim47        | tripartite motif-containing 47                                                              | 0 |
| 1201 | O8C009 | IDBG-null     | Rap guanine nucleotide exchange factor (GEF) 5                                              | 0 |
| 1202 | O8C051 | Dis3l         | DIS3 mitotic control homolog (S. cerevisiae)-like                                           | 0 |
| 1203 | O8C0V1 | Ccd79         | coiled-coil domain containing 79                                                            | 0 |
| 1204 | O8C0V9 | Frm6d         | FERM domain containing 6                                                                    | 0 |
| 1205 | O8C0X8 | 4921509C19Rik | RIKEN cDNA 4921509C19 gene                                                                  | 0 |
| 1206 | O8C152 | Fam46b        | family with sequence similarity 46, member B                                                | 0 |
| 1207 | O8C176 | Taf2          | TAF2 RNA polymerase II, TATA box binding protein (TBP)-associated factor                    | 0 |
| 1208 | O8C1F5 | Ttc16         | tetratricopeptide repeat domain 16                                                          | 0 |
| 1209 | O8C2K1 | Def6          | differentially expressed in FDCP 6                                                          | 0 |
| 1210 | O8C2S5 | Fbxl5         | F-box and leucine-rich repeat protein 5                                                     | 0 |
| 1211 | O8CK6  | Sic5a1        | solute carrier family 5 (sodium/glucose cotransporter), member 1                            | 0 |
| 1212 | O8C3L1 | D630042P16Rik | RIKEN cDNA D630042P16 gene                                                                  | 0 |
| 1213 | O8C3M9 | D630023F18Rik | RIKEN cDNA D630023F18 gene                                                                  | 0 |
| 1214 | O8C3P7 | Mettl3        | methyltransferase like 3                                                                    | 0 |
| 1215 | O8C3O5 | Shisa7        | shisa homolog 7 (Xenopus laevis)                                                            | 0 |
| 1216 | O8C3W1 | 2310022B05Rik | RIKEN cDNA 2310022B05 gene                                                                  | 0 |
| 1217 | O8C3Y4 | Kntc1         | kinetochore associated 1                                                                    | 0 |
| 1218 | O8C4J0 | Ccdc60        | coiled-coil domain containing 60                                                            | 0 |
| 1219 | O8C525 | 1600021P15Rik | RIKEN cDNA 1600021P15 gene                                                                  | 0 |
| 1220 | O8C561 | Lmbrd2        | LMBR1 domain containing 2                                                                   | 0 |
| 1221 | O8C5L3 | Cnot2         | CCR4-NOT transcription complex, subunit 2                                                   | 0 |
| 1222 | O8C5P5 | Nt50c1        | 5'-nucleotidase domain containing 1                                                         | 0 |
| 1223 | O8C5V5 | Wdr27         | WD repeat domain 27                                                                         | 0 |
| 1224 | O8C636 | Spata16       | spermatogenesis associated 16                                                               | 0 |
| 1225 | O8C729 | Fam126b       | family with sequence similarity 126, member B                                               | 0 |
| 1226 | O8C7U1 | N4bp3         | NEDD4 binding protein 3                                                                     | 0 |
| 1227 | O8C817 | Tmem200a      | transmembrane protein 200A                                                                  | 0 |
| 1228 | O8C8B0 | Alx1          | ALX homeobox 1                                                                              | 0 |
| 1229 | O8CA03 | Sic46a2       | solute carrier family 46, member 2                                                          | 0 |
| 1230 | O8CB44 | Gramd4        | GRAM domain containing 4                                                                    | 0 |
| 1231 | O8CB87 | Rab44         | RAB44, member RAS oncogene family                                                           | 0 |
| 1232 | O8CBW4 | Dcaf12l1      | DDb1 and CUL4 associated factor 12-like 1                                                   | 0 |
| 1233 | O8CC51 | Fam164c       | family with sequence similarity 164, member C                                               | 0 |
| 1234 | O8CCM6 | 1700034H14Rik | RIKEN cDNA 1700034H14 gene                                                                  | 0 |
| 1235 | O8CCN5 | Bcas3         | breast carcinoma amplified sequence 3                                                       | 0 |
| 1236 | O8CDA1 | Inpp5f        | inositol polyphosphate-5-phosphatase F                                                      | 0 |
| 1237 | O8CDN1 | 4930590J08Rik | RIKEN cDNA 4930590J08 gene                                                                  | 0 |
| 1238 | O8CDP0 | Aqbl3         | ATP/GTP binding protein-like 3                                                              | 0 |
| 1239 | O8CDU5 | Efhd          | EF hand domain family, member B                                                             | 0 |
| 1240 | O8CDU6 | Hectd2        | HECT domain containing 2                                                                    | 0 |
| 1241 | O8CDV6 | Ccdc63        | coiled-coil domain containing 63                                                            | 0 |
| 1242 | O8CE13 | Ccd17         | coiled-coil domain containing 17                                                            | 0 |
| 1243 | O8CE96 | IDBG-null     | tRNA methyltransferase 6 homolog (S. cerevisiae)                                            | 0 |
| 1244 | O8CEE6 | Pask          | PAS domain containing serine/threonine kinase                                               | 0 |
| 1245 | O8CFE4 | IDBG-null     | SCY1-like 2 (S. cerevisiae)                                                                 | 0 |
| 1246 | O8CFG9 | C1rb          | complement component 1, r subcomponent B                                                    | 0 |
| 1247 | O8CFI5 | Pars2         | prolyl-tRNA synthetase (mitochondrial)(putative)                                            | 0 |
| 1248 | O8CFL8 | Zswim3        | zinc finger, SWIM domain containing 3                                                       | 0 |
| 1249 | O8CFP6 | Dnaic27       | DnaJ (Hsp40) homolog, subfamily C, member 27                                                | 0 |
| 1250 | O8CFS6 | Kcnv2         | potassium channel, subfamily V, member 2                                                    | 0 |
| 1251 | O8CG65 | Sspo          | SCO-spondin                                                                                 | 0 |
| 1252 | O8CG76 | Akr7a5        | aldo-keto reductase family 7, member A5 (aflatoxin aldehyde reductase)                      | 0 |
| 1253 | O8CGP1 | IDBG-null     | histone cluster 1, H2bk                                                                     | 0 |
| 1254 | O8CGP5 | Hist1h2af     | histone cluster 1, H2af                                                                     | 0 |
| 1255 | O8CH02 | Suap1         | SURP and G patch domain containing 1                                                        | 0 |
| 1256 | O8CHG5 | 1110018G07Rik | RIKEN cDNA 1110018G07 gene                                                                  | 0 |
| 1257 | O8CHH5 | BC032203      | cDNA sequence BC032203                                                                      | 0 |
| 1258 | O8CHJ2 | Aqp12         | aquaporin 12                                                                                | 0 |
| 1259 | O8CHP5 | Wiba          | within bcn homolog (Drosophila)                                                             | 0 |
| 1260 | O8CHS2 | Dnaic22       | DnaJ (Hsp40) homolog, subfamily C, member 22                                                | 0 |
| 1261 | O8C143 | Mvl6b         | mvosin, light polypeptide 6B                                                                | 0 |
| 1262 | O8C151 | Pdlim5        | PDZ and LIM domain 5                                                                        | 0 |
| 1263 | O8C185 | Car12         | carbonic anhydrase 12                                                                       | 0 |
| 1264 | O8C185 | Fermt2        | fermitin family homolog 2 (Drosophila)                                                      | 0 |
| 1265 | O8CIN6 | Celf3         | CUGBP, Elav-like family member 3                                                            | 0 |
| 1266 | O8CIP5 | Disp2         | dispatched homolog 2 (Drosophila)                                                           | 0 |
| 1267 | O8JZX3 | Poc1a         | POC1 centriolar protein homolog A (Chlamydomonas)                                           | 0 |
| 1268 | O8JZX4 | Rbm17         | RNA binding motif protein 17                                                                | 0 |
| 1269 | O8JZY2 | Comm10        | COMM domain containing 10                                                                   | 0 |
| 1270 | O8K007 | Sulf1         | sulfatase 1                                                                                 | 0 |
| 1271 | O8K070 | Samd14        | sterile alpha motif domain containing 14                                                    | 0 |
| 1272 | O8K072 | Reep4         | receptor accessory protein 4                                                                | 0 |
| 1273 | O8K083 | Lrrc66        | leucine rich repeat containing 66                                                           | 0 |
| 1274 | O8K0C9 | Gm6d          | GDP-mannose 4, 6-dehydratase                                                                | 0 |
| 1275 | O8K0D5 | Gfm1          | G elongation factor, mitochondrial 1                                                        | 0 |
| 1276 | O8K0L9 | Zbtb20        | zinc finger and BTB domain containing 20                                                    | 0 |
| 1277 | O8K1G2 | Evc2          | Ellis van Creveld syndrome 2 homolog (human)                                                | 0 |
| 1278 | O8K1R3 | Pnpt1         | polynucleotide nucleotidyltransferase 1                                                     | 0 |
| 1279 | O8K1S2 | Unc5d         | unc-5 homolog D (C. elegans)                                                                | 0 |
| 1280 | O8K1X1 | Wdr11         | WD repeat domain 11                                                                         | 0 |
| 1281 | O8K1Y2 | Prkd3         | protein kinase D3                                                                           | 0 |
| 1282 | O8K224 | Nat10         | N-acetyltransferase 10                                                                      | 0 |
| 1283 | O8K2D0 | Fam199x       | family with sequence similarity 199, X-linked                                               | 0 |
| 1284 | O8K2V1 | Ppp4r1        | protein phosphatase 4, regulatory subunit 1                                                 | 0 |
| 1285 | O8K2W3 | IDBG-null     | thioredoxin domain containing 11                                                            | 0 |
| 1286 | O8K342 | Rassf9        | Ras association (RalGDS/AF-6) domain family (N-terminal) member 9                           | 0 |
| 1287 | O8K3C3 | Lzic          | leucine zipper and CTNNBIP1 domain containing                                               | 0 |
| 1288 | O8K3O3 | Foxn4         | forkhead box N4                                                                             | 0 |
| 1289 | O8K3V1 | Spata4        | spermatogenesis associated 4                                                                | 0 |
| 1290 | O8K3X4 | 6430527G18Rik | RIKEN cDNA 6430527G18 gene                                                                  | 0 |
| 1291 | O8K450 | Spaq16        | sperm associated antigen 16                                                                 | 0 |
| 1292 | O8K482 | Emilin2       | elastin microfibril interfacier 2                                                           | 0 |
| 1293 | O8OZV7 | 4933424B01Rik | RIKEN cDNA 4933424B01 gene                                                                  | 0 |
| 1294 | O8ROX2 | 2700078E11Rik | RIKEN cDNA 2700078E11 gene                                                                  | 0 |
| 1295 | O8R1C0 | Kcnca4        | potassium voltage gated channel, Shaw-related subfamily, member 4                           | 0 |

|      |         |               |                                                                                 |   |
|------|---------|---------------|---------------------------------------------------------------------------------|---|
| 1296 | O8R1G1  | Tasp1         | taspage, threonine aspartase 1                                                  | 0 |
| 1297 | O8R1M2  | H2afi         | H2A histone family, member J                                                    | 0 |
| 1298 | O8R1P5  | Kcnk13        | potassium channel, subfamily K, member 13                                       | 0 |
| 1299 | O8R2G4  | Art3          | ADP-ribosyltransferase 3                                                        | 0 |
| 1300 | O8R2H9  | Phospho1      | phosphatase, orphan 1                                                           | 0 |
| 1301 | O8R2P1  | Kihl25        | Kelch-like 25 (Drosophila)                                                      | 0 |
| 1302 | O8R2Z3  | Slc25a7       | solute carrier family 25, member 7                                              | 0 |
| 1303 | O8R370  | Ushbp1        | Usher syndrome 1C binding protein 1                                             | 0 |
| 1304 | O8R3L2  | Tcf25         | transcription factor 25 (basic helix-loop-helix)                                | 0 |
| 1305 | O8R3Y8  | Irf2bp1       | interferon regulatory factor 2 binding protein 1                                | 0 |
| 1306 | O8R429  | Atp2a1        | ATPase, Ca++ transporting, cardiac muscle, fast twitch 1                        | 0 |
| 1307 | O8R493  | Chrb4         | cholinergic receptor, nicotinic, beta polypeptide 4                             | 0 |
| 1308 | O8R4H4  | Cpa5          | carboxypeptidase A5                                                             | 0 |
| 1309 | O8R4P4  | Tmc2          | transmembrane channel-like gene family 2                                        | 0 |
| 1310 | O8R4U6  | Top1mt        | DNA topoisomerase 1, mitochondrial                                              | 0 |
| 1311 | O8R502  | Lrrc8c        | leucine rich repeat containing 8 family, member C                               | 0 |
| 1312 | O8R5K4  | Nol6          | nucleolar protein family 6 (RNA-associated)                                     | 0 |
| 1313 | O8VBT2  | Sds           | serine dehydratase                                                              | 0 |
| 1314 | O8VC12  | Uroc1         | urocanase domain containing 1                                                   | 0 |
| 1315 | O8VC70  | Rbms2         | RNA binding motif, single stranded interacting protein 2                        | 0 |
| 1316 | O8VCB3  | Gvs2          | glycoen synthase 2                                                              | 0 |
| 1317 | O8VC10  | Plbd1         | phospholipase B domain containing 1                                             | 0 |
| 1318 | O8VCR2  | Hsd17b13      | hydroxysteroid (17-beta) dehydrogenase 13                                       | 0 |
| 1319 | O8VCR3  | 5730437N04Rik | RIKEN cDNA 5730437N04 gene                                                      | 0 |
| 1320 | O8VCR8  | Mylk2         | myosin, light polypeptide kinase 2, skeletal muscle                             | 0 |
| 1321 | O8VCT9  | TesK2         | testis-specific kinase 2                                                        | 0 |
| 1322 | O8VCV5  | Cbara1        | calcium binding atopy-related autoantigen 1                                     | 0 |
| 1323 | O8VCZ7  | Zbtb7c        | zinc finger and BTB domain containing 7C                                        | 0 |
| 1324 | O8VCZ9  | Prodh2        | proline dehydrogenase (oxidase) 2                                               | 0 |
| 1325 | O8VDC1  | Fycy1         | FYVE and coiled-coil domain containing 1                                        | 0 |
| 1326 | O8VDH1  | Fbxo21        | F-box protein 21                                                                | 0 |
| 1327 | O8VDM4  | Psmid2        | proteasome (prosome, macropain) 26S subunit, non-ATPase, 2                      | 0 |
| 1328 | O8VDO1  | IDBG-null     | prostaqlandin reductase 2                                                       | 0 |
| 1329 | O8VDO9  | Kri1          | KRI1 homolog (S. cerevisiae)                                                    | 0 |
| 1330 | O8VDS7  | Cep5711       | centrosomal protein 57-like 1                                                   | 0 |
| 1331 | O8VDU0  | Gpsm2         | G-protein signalling modulator 2 (AGS3-like, C. elegans)                        | 0 |
| 1332 | O8VDV3  | IDBG-null     | RAB24 interacting protein (rabln3)-like 1                                       | 0 |
| 1333 | O8VDY9  | 5830433M19Rik | RIKEN cDNA 5830433M19 gene                                                      | 0 |
| 1334 | O8VE52  | Odfrr1        | oploid growth factor receptor-like 1                                            | 0 |
| 1335 | O8VE88  | Fam114a2      | family with sequence similarity 114, member A2                                  | 0 |
| 1336 | O8VEE1  | Lmcd1         | LIM and cysteine-rich domains 1                                                 | 0 |
| 1337 | O8VEI3  | Hyal3         | hyaluronoglucosaminidase 3                                                      | 0 |
| 1338 | O8VEJ9  | Vps4a         | vacuolar protein sorting 4a (yeast)                                             | 0 |
| 1339 | O8VEN2  | 1600029D21Rik | RIKEN cDNA 1600029D21 gene                                                      | 0 |
| 1340 | O8VG42  | Olfrr508      | olfactory receptor 508                                                          | 0 |
| 1341 | O8VHG2  | Amot          | angiominin                                                                      | 0 |
| 1342 | O8VHW2  | Edaradd       | EDAR (ectodysplasin-A receptor)-associated death domain                         | 0 |
| 1343 | O8VJ59  | Pcnx3         | pecanex-like 3 (Drosophila)                                                     | 0 |
| 1344 | O8VIG0  | Zcchc14       | zinc finger, CCHC domain containing 14                                          | 0 |
| 1345 | O8VII8  | IDBG-null     | nuclear receptor subfamily 3, group C, member 2                                 | 0 |
| 1346 | O91V01  | Lpcat3        | lysophosphatidylcholine acyltransferase 3                                       | 0 |
| 1347 | O91V12  | Aco7          | acyl-CoA thioesterase 7                                                         | 0 |
| 1348 | O91V24  | Abca7         | ATP-binding cassette, sub-family A (ABC1), member 7                             | 0 |
| 1349 | O91V80  | ApoF          | apolipoprotein F                                                                | 0 |
| 1350 | O91VH2  | Snx9          | sorting nexin 9                                                                 | 0 |
| 1351 | O91VL9  | Zbtb1         | zinc finger and BTB domain containing 1                                         | 0 |
| 1352 | O91VU8  | Plov1         | prostate tumor over expressed gene 1                                            | 0 |
| 1353 | O91W18  | Tdrd3         | tudor domain containing 3                                                       | 0 |
| 1354 | O91W69  | Epn3          | epsin 3                                                                         | 0 |
| 1355 | O91W96  | Anapc4        | anaphase promoting complex subunit 4                                            | 0 |
| 1356 | O91WC0  | Setd3         | SET domain containing 3                                                         | 0 |
| 1357 | O91WC3  | Acsf6         | acyl-CoA synthetase long-chain family member 6                                  | 0 |
| 1358 | O91WF3  | Adcy4         | adenylate cyclase 4                                                             | 0 |
| 1359 | O91WG8  | Gne           | glucosamine                                                                     | 0 |
| 1360 | O91WM1  | Strbp         | spermatid perinuclear RNA binding protein                                       | 0 |
| 1361 | O91X44  | Gckr          | glucokinase regulatory protein                                                  | 0 |
| 1362 | O91X46  | Rhogef3       | Rho guanine nucleotide exchange factor (GEF) 3                                  | 0 |
| 1363 | O91X86  | Tmem98        | transmembrane protein 98                                                        | 0 |
| 1364 | O91XL3  | Uxs1          | UDP-glucuronate decarboxylase 1                                                 | 0 |
| 1365 | O91XP5  | Gira3         | glycine receptor, alpha 3 subunit                                               | 0 |
| 1366 | O91XT4  | Sec16b        | SEC16 homolog B (S. cerevisiae)                                                 | 0 |
| 1367 | O91XV3  | Basp1         | brain abundant, membrane attached signal protein 1                              | 0 |
| 1368 | O91Y47  | F11           | coagulation factor XI                                                           | 0 |
| 1369 | O91Y63  | Slc13a3       | solute carrier family 13 (sodium-dependent dicarboxylate transporter), member 3 | 0 |
| 1370 | O91YD4  | Trpm2         | transient receptor potential cation channel, subfamily M, member 2              | 0 |
| 1371 | O91YE7  | Rbm5          | RNA binding motif protein 5                                                     | 0 |
| 1372 | O91YM4  | Tbrn4         | transforming growth factor beta regulated gene 4                                | 0 |
| 1373 | O91YP3  | Dera          | 2-deoxyribose-5-phosphate aldolase homolog (C. elegans)                         | 0 |
| 1374 | O91YW3  | Dnaic3        | DnaJ (Hsp40) homolog, subfamily C, member 3                                     | 0 |
| 1375 | O91Z22  | Tmem123       | transmembrane protein 123                                                       | 0 |
| 1376 | O91Z49  | Fytd1         | forty-two-three domain containing 1                                             | 0 |
| 1377 | O91ZR5  | Catsper1      | cation channel, sperm associated 1                                              | 0 |
| 1378 | O91ZU9  | Grin3b        | glutamate receptor, ionotropic, NMDA3B                                          | 0 |
| 1379 | O91ZW8  | Cd209d        | CD209d antigen                                                                  | 0 |
| 1380 | O920G3  | Siqlec5       | sialic acid binding Iq-like lectin 5                                            | 0 |
| 1381 | O920G8  | IDBG-null     | solute carrier family 25, member 37                                             | 0 |
| 1382 | O920M5  | Coro6         | coronin 6                                                                       | 0 |
| 1383 | O920S3  | Gatad1        | GATA zinc finger domain containing 1                                            | 0 |
| 1384 | O921G6  | Lrch4         | leucine-rich repeats and calponin homology (CH) domain containing 4             | 0 |
| 1385 | O921H8  | Acaa1a        | acetyl-Coenzyme A acyltransferase 1A                                            | 0 |
| 1386 | O921R4  | Dnaic14       | DnaJ (Hsp40) homolog, subfamily C, member 14                                    | 0 |
| 1387 | O921W0  | Chmp1a        | charged multivesicular body protein 1A                                          | 0 |
| 1388 | O922B2  | Dars          | aspartyl-tRNA synthetase                                                        | 0 |
| 1389 | O922M5  | Cdca71        | cell division cycle associated 7 like                                           | 0 |
| 1390 | O922Q2  | RioK1         | RIO kinase 1 (yeast)                                                            | 0 |
| 1391 | O922Q5  | Slc35b3       | solute carrier family 35, member B3                                             | 0 |
| 1392 | O922U11 | Prip3         | PRP3 pre-mRNA processing factor 3 homolog (yeast)                               | 0 |
| 1393 | O923T9  | Camk2q        | calcium/calmodulin-dependent protein kinase II gamma                            | 0 |
| 1394 | O924T2  | Mrrs2         | mitochondrial ribosomal protein S2                                              | 0 |
| 1395 | O93092  | Taldo1        | transaldolase 1                                                                 | 0 |
| 1396 | O99J31  | Ophn1         | oligophrenin 1                                                                  | 0 |
| 1397 | O99JT1  | Pet112l       | PET112-like (yeast)                                                             | 0 |
| 1398 | O99K28  | Arfap2        | ADP-ribosylation factor GTPase activating protein 2                             | 0 |
| 1399 | O99K67  | Aas           | aminoadipate-semialdehyde synthase                                              | 0 |
| 1400 | O99KE1  | Me2           | malic enzyme 2, NAD(+) dependent, mitochondrial                                 | 0 |
| 1401 | O99KH8  | Stk24         | serine/threonine kinase 24 (STE20 homolog, yeast)                               | 0 |
| 1402 | O99KJ9  | Hars2         | histidyl-tRNA synthetase 2, mitochondrial (putative)                            | 0 |
| 1403 | O99KN9  | IDBG-null     | clathrin interactor 1                                                           | 0 |
| 1404 | O99L04  | Dhrs1         | dehydrogenase/reductase (SDR family) member 1                                   | 0 |
| 1405 | O99LC5  | EtfA          | electron transferring flavoprotein, alpha polypeptide                           | 0 |
| 1406 | O99LE1  | Rilpl2        | Rab interacting lysosomal protein-like 2                                        | 0 |
| 1407 | O99LG0  | Usp16         | ubiquitin specific peptidase 16                                                 | 0 |
| 1408 | O99LG1  | Tmem51        | transmembrane protein 51                                                        | 0 |
| 1409 | O99LJ6  | Gpx7          | glutathione peroxidase 7                                                        | 0 |
| 1410 | O99M01  | Fars2         | phenylalanine-tRNA synthetase 2 (mitochondrial)                                 | 0 |
| 1411 | O99M54  | Cdca3         | cell division cycle associated 3                                                | 0 |
| 1412 | O99M12  | IDBG-null     | tyrosine kinase, non-receptor, 1                                                | 0 |
| 1413 | O99MR6  | Srrt          | serrate RNA effector molecule homolog (Arabidopsis)                             | 0 |
| 1414 | O99MR9  | Ppd1r3a       | protein phosphatase 1, regulatory (inhibitor) subunit 3A                        | 0 |

|      |        |               |                                                                                    |   |
|------|--------|---------------|------------------------------------------------------------------------------------|---|
| 1415 | O99M57 | Ehbp111       | EH domain binding protein 1-like 1                                                 | 0 |
| 1416 | O99MV5 | Mov1011       | Moloney leukemia virus 10-like 1                                                   | 0 |
| 1417 | O99N64 | Gm2825        | predicted gene 2825                                                                | 0 |
| 1418 | O99NB1 | Acss1         | acyl-CoA synthetase short-chain family member 1                                    | 0 |
| 1419 | O99N13 | Gtf2ird2      | GTF2I repeat domain containing 2                                                   | 0 |
| 1420 | O99PE8 | Abca5         | ATP-binding cassette, sub-family G (WHITE), member 5                               | 0 |
| 1421 | O99PL6 | Ubxm6         | UBX domain protein 6                                                               | 0 |
| 1422 | O99PV8 | Bcl11b        | B-cell leukemia/lymphoma 11B                                                       | 0 |
| 1423 | O9CPN8 | Igf2bp3       | insulin-like growth factor 2 mRNA binding protein 3                                | 0 |
| 1424 | O9CPT0 | Bcl2l14       | BCL2-like 14 (apoptosis facilitator)                                               | 0 |
| 1425 | O9CPV4 | IDBG-null     | glvoxalase domain containing 4                                                     | 0 |
| 1426 | O9CPV9 | P2ry12        | purinergic receptor P2Y, G-protein coupled 12                                      | 0 |
| 1427 | O9CPW0 | IDBG-null     | contactin associated protein-like 2                                                | 0 |
| 1428 | O9CO61 | Unc50         | unc-50 homolog (C. elegans)                                                        | 0 |
| 1429 | O9CO53 | Fibin         | fin bud initiation factor homolog (zebrafish)                                      | 0 |
| 1430 | O9COV1 | IDBG-null     | presequeance translocase-associated motor 16 homolog (S. cerevisiae)               | 0 |
| 1431 | O9CR73 | PnrC2         | proline-rich nuclear receptor coactivator 2                                        | 0 |
| 1432 | O9CRA9 | Faf1op2       | FGFR1 oncogene partner 2                                                           | 0 |
| 1433 | O9CRC9 | Gnpda2        | glucosamine-6-phosphate deaminase 2                                                | 0 |
| 1434 | O9CUL5 | IDBG-null     | IQ motif containing with AAA domain                                                | 0 |
| 1435 | O9CWJ9 | Atic          | 5-aminoimidazole-4-carboxamide ribonucleotide formyltransferase/IMP cyclohydrolase | 0 |
| 1436 | O9CWP6 | Mospd2        | motile sperm domain containing 2                                                   | 0 |
| 1437 | O9CWW6 | Pin4          | protein (peptidyl-prolyl cis/trans isomerase) NIMA-interacting, 4 (parvulin)       | 0 |
| 1438 | O9CWZ7 | Napq          | N-ethylmaleimide sensitive fusion protein attachment protein gamma                 | 0 |
| 1439 | O9CX97 | Wdr55         | WD repeat domain 55                                                                | 0 |
| 1440 | O9CX06 | Ccdc90a       | coiled-coil domain containing 90A                                                  | 0 |
| 1441 | O9CYN2 | Sacs2         | signal peptidase complex subunit 2 homolog (S. cerevisiae)                         | 0 |
| 1442 | O9CYU6 | Wdr85         | WD repeat domain 85                                                                | 0 |
| 1443 | O9CZ19 | Aen           | apoptosis enhancing nuclease                                                       | 0 |
| 1444 | O9D0B8 | Ribc1         | RIB43A domain with coiled-coils 1                                                  | 0 |
| 1445 | O9D0I9 | Rars          | arginyl-tRNA synthetase                                                            | 0 |
| 1446 | O9D0R4 | Ddx56         | DEAD (Asp-Glu-Ala-Asp) box polypeptide 56                                          | 0 |
| 1447 | O9D1E6 | Tbcb          | tubulin folding cofactor B                                                         | 0 |
| 1448 | O9D1F5 | 3010026009Rik | RIKEN cDNA 3010026009 gene                                                         | 0 |
| 1449 | O9D1H7 | Get4          | golgi to ER traffic protein 4 homolog (S. cerevisiae)                              | 0 |
| 1450 | O9D2F7 | Nup210l       | nucleoporin 210-like                                                               | 0 |
| 1451 | O9D2C5 | Symt2         | symnaptotain 2                                                                     | 0 |
| 1452 | O9D2H2 | Ak7           | adenylylate kinase 7                                                               | 0 |
| 1453 | O9D2H8 | Fndc8         | fibronectin type III domain containing 8                                           | 0 |
| 1454 | O9D394 | Rufy3         | RUN and FYVE domain containing 3                                                   | 0 |
| 1455 | O9D3R5 | Fam187a       | family with sequence similarity 187, member A                                      | 0 |
| 1456 | O9D3W5 | 4933430H15Rik | RIKEN cDNA 4933430H15 gene                                                         | 0 |
| 1457 | O9D439 | Ccdc11        | coiled-coil domain containing 11                                                   | 0 |
| 1458 | O9D4C5 | Eaf1          | ELL associated factor 1                                                            | 0 |
| 1459 | O9D4D4 | Tkt12         | transketolase-like 2                                                               | 0 |
| 1460 | O9D4H2 | Gcc1          | golgi coiled coil 1                                                                | 0 |
| 1461 | O9D4H9 | Phf14         | PHD finger protein 14                                                              | 0 |
| 1462 | O9D4K5 | Fam166a       | family with sequence similarity 166, member A                                      | 0 |
| 1463 | O9D572 | Ubxn11        | UBX domain protein 11                                                              | 0 |
| 1464 | O9D5A0 | Spesp1        | sperm equatorial segment protein 1                                                 | 0 |
| 1465 | O9D5E4 | Lrrc48        | leucine rich repeat containing 48                                                  | 0 |
| 1466 | O9D5U8 | 4921517L17Rik | RIKEN cDNA 4921517L17 gene                                                         | 0 |
| 1467 | O9D695 | Serpinb7      | serine (or cysteine) peptidase inhibitor, clade B, member 7                        | 0 |
| 1468 | O9D6F4 | Gabra4        | gamma-aminobutyric acid (GABA) A receptor, subunit alpha 4                         | 0 |
| 1469 | O9D787 | Ppil2         | peptidylprolyl isomerase (cyclophilin)-like 2                                      | 0 |
| 1470 | O9D7F7 | Chmp4c        | charged multivesicular body protein 4C                                             | 0 |
| 1471 | O9D7H3 | Rna1          | RNA terminal phosphate cyclase domain 1                                            | 0 |
| 1472 | O9D7J8 | Fam83d        | family with sequence similarity 83, member D                                       | 0 |
| 1473 | O9D7J9 | Echdc3        | enoyl Coenzyme A hydratase domain containing 3                                     | 0 |
| 1474 | O9D832 | Dnaib4        | DnaJ (Hsp40) homolog, subfamily B, member 4                                        | 0 |
| 1475 | O9D842 | Alpf          | apratxin and PNKP like factor                                                      | 0 |
| 1476 | O9D8B6 | 2010011120Rik | RIKEN cDNA 2010011120 gene                                                         | 0 |
| 1477 | O9D8K8 | Slc25a39      | solute carrier family 25, member 39                                                | 0 |
| 1478 | O9D8S3 | Arfoap3       | ADP-ribosylation factor GTPase activating protein 3                                | 0 |
| 1479 | O9D9D9 | 1700094D03Rik | RIKEN cDNA 1700094D03 gene                                                         | 0 |
| 1480 | O9D9F5 | Tbc1d20       | TBC1 domain family, member 20                                                      | 0 |
| 1481 | O9D9A9 | 1700011E24Rik | RIKEN cDNA 1700011E24 gene                                                         | 0 |
| 1482 | O9DAM7 | AI597468      | expressed sequence AI597468                                                        | 0 |
| 1483 | O9DB90 | 1500002O20Rik | RIKEN cDNA 1500002O20 gene                                                         | 0 |
| 1484 | O9DBA8 | Amdhd1        | amidohydrolase domain containing 1                                                 | 0 |
| 1485 | O9DBE9 | Ftsi3         | FtsJ homolog 3 (E. coli)                                                           | 0 |
| 1486 | O9DBM1 | Gpatch1       | G patch domain containing 1                                                        | 0 |
| 1487 | O9DBN4 | 4833439L19Rik | RIKEN cDNA 4833439L19 gene                                                         | 0 |
| 1488 | O9DBP0 | Slc34a2       | solute carrier family 34 (sodium phosphate), member 2                              | 0 |
| 1489 | O9DBO9 | 1200016B10Rik | RIKEN cDNA 1200016B10 gene                                                         | 0 |
| 1490 | O9DBU3 | Rio3          | RIO kinase 3 (yeast)                                                               | 0 |
| 1491 | O9DBV8 | Nvl           | nuclear VCP-like                                                                   | 0 |
| 1492 | O9DC29 | Abcb6         | ATP-binding cassette, sub-family B (MDR/TAP), member 6                             | 0 |
| 1493 | O9DCS3 | Mecr          | mitochondrial trans-2-enoyl-CoA reductase                                          | 0 |
| 1494 | O9DCV6 | 0610009O20Rik | RIKEN cDNA 0610009O20 gene                                                         | 0 |
| 1495 | O9EP72 | 2900064A13Rik | RIKEN cDNA 2900064A13 gene                                                         | 0 |
| 1496 | O9EP75 | Cyp4f14       | cytochrome P450, family 4, subfamily f, polypeptide 14                             | 0 |
| 1497 | O9EPU0 | Upf1          | UPF1 regulator of nonsense transcripts homolog (yeast)                             | 0 |
| 1498 | O9EPU5 | Tnfrsf21      | tumor necrosis factor receptor superfamily, member 21                              | 0 |
| 1499 | O9EQ09 | Olr1          | oxidized low density lipoprotein (lectin-like) receptor 1                          | 0 |
| 1500 | O9EQJ0 | Tpchn1        | two pore channel 1                                                                 | 0 |
| 1501 | O9EQK7 | Icmt          | isoprenylcysteine carboxyl methyltransferase                                       | 0 |
| 1502 | O9EOM3 | Nkx2-4        | NK2 transcription factor related, locus 4 (Drosophila)                             | 0 |
| 1503 | O9ER16 | Rdh14         | retinol dehydrogenase 14 (all-trans and 9-cis)                                     | 0 |
| 1504 | O9ERV1 | Mkrm2         | makorin, ring finger protein, 2                                                    | 0 |
| 1505 | O9ES88 | Slc13a2       | solute carrier family 13 (sodium-dependent dicarboxylate transporter), member 2    | 0 |
| 1506 | O9ESE1 | Lrba          | LPS-responsive beige-like anchor                                                   | 0 |
| 1507 | O9ESG6 | P2ry14        | purinergic receptor P2Y, G-protein coupled, 14                                     | 0 |
| 1508 | O9ET37 | Slc5a4a       | solute carrier family 5, member 4a                                                 | 0 |
| 1509 | O9JHB2 | Olfir19       | olfactory receptor 19                                                              | 0 |
| 1510 | O9JHC9 | Erf2          | E74-like factor 2                                                                  | 0 |
| 1511 | O9JH17 | Exosc9        | exosome component 9                                                                | 0 |
| 1512 | O9JHP7 | Kdelc1        | KDEL (Lys-Asp-Glu-Leu) containing 1                                                | 0 |
| 1513 | O9JI38 | Pus3          | pseudouridine synthase 3                                                           | 0 |
| 1514 | O9JI57 | Gtf2ird1      | general transcription factor II I repeat domain-containing 1                       | 0 |
| 1515 | O9JIM3 | IDBG-null     | RIKEN cDNA 0610007P08 gene                                                         | 0 |
| 1516 | O9JJB9 | Ccdc86        | coiled-coil domain containing 86                                                   | 0 |
| 1517 | O9JIX6 | P2rx4         | purinergic receptor P2X, ligand-gated ion channel 4                                | 0 |
| 1518 | O9JYJ3 | Smpd3         | sphingomyelin phosphodiesterase 3, neutral                                         | 0 |
| 1519 | O9JJZ2 | Tuba8         | tubulin, alpha 8                                                                   | 0 |
| 1520 | O9JK45 | Kcna5         | potassium voltage-gated channel, subfamily O, member 5                             | 0 |
| 1521 | O9JKV2 | Ick           | intestinal cell kinase                                                             | 0 |
| 1522 | O9JL26 | Fmnl1         | formin-like 1                                                                      | 0 |
| 1523 | O9JLN6 | Adam28        | a disintegrin and metallopeptidase domain 28                                       | 0 |
| 1524 | O9QVY8 | Rai2          | retinoic acid induced 2                                                            | 0 |
| 1525 | O9QXH4 | Itaax         | integrin alpha X                                                                   | 0 |
| 1526 | O9QXN0 | Shroom3       | shroom family member 3                                                             | 0 |
| 1527 | O9QXZ6 | Slc01a1       | solute carrier organic anion transporter family, member 1a1                        | 0 |
| 1528 | O9QXZ7 | Nr2e3         | nuclear receptor subfamily 2, group E, member 3                                    | 0 |
| 1529 | O9QY83 | Actt7b        | actin-like 7b                                                                      | 0 |
| 1530 | O9QY66 | Golaa5        | golgi autoantigen, golain subfamily a, 5                                           | 0 |
| 1531 | O9QYV8 | Spast         | spastin                                                                            | 0 |
| 1532 | O9QYZ6 | Smok2a        | sperm motility kinase 2A                                                           | 0 |
| 1533 | O9OZB1 | Rgs20         | regulator of G-protein signaling 20                                                | 0 |

|      |        |           |                                                                                                               |   |
|------|--------|-----------|---------------------------------------------------------------------------------------------------------------|---|
| 1534 | O9OZ05 | Chml      | choroideremia-like                                                                                            | 0 |
| 1535 | O9OZ08 | Slc25a10  | solute carrier family 25 (mitochondrial carrier, dicarboxylate transporter), member 10                        | 0 |
| 1536 | O9OZ18 | Serinc1   | serine incorporator 1                                                                                         | 0 |
| 1537 | O9OZN0 | Fbxo15    | F-box protein 15                                                                                              | 0 |
| 1538 | O9R001 | Adamts5   | a disintegrin-like and metallopeptidase (reprolysin type) with thrombospondin type 1 motif, 5 (aggrecanase-2) | 0 |
| 1539 | O9R0A1 | Clcn2     | chloride channel 2                                                                                            | 0 |
| 1540 | O9R0H0 | Acox1     | acyl-Coenzyme A oxidase 1, palmitoyl                                                                          | 0 |
| 1541 | O9R0L7 | Akap8l    | A kinase (PRKA) anchor protein 8-like                                                                         | 0 |
| 1542 | O9R0X2 | Adamdec1  | ADAM-like, decysin 1                                                                                          | 0 |
| 1543 | O9R1S8 | Adam26a   | a disintegrin and metallopeptidase domain 26A (testase 3)                                                     | 0 |
| 1544 | O9R1J0 | Nsdhl     | NAD(P) dependent steroid dehydrogenase-like                                                                   | 0 |
| 1545 | O9R1N9 | Col13a1   | collagen, type XIII, alpha 1                                                                                  | 0 |
| 1546 | O9R1S8 | Capn7     | calpain 7                                                                                                     | 0 |
| 1547 | O9WTK2 | Cdyl      | chromodomain protein, Y chromosome-like                                                                       | 0 |
| 1548 | O9WTK3 | Gpaa1     | GPI anchor attachment protein 1                                                                               | 0 |
| 1549 | O9WTK6 | Slc22a21  | solute carrier family 22 (organic cation transporter), member 21                                              | 0 |
| 1550 | O9WTP7 | Ak3       | adenylate kinase 3                                                                                            | 0 |
| 1551 | O9WTS2 | Fut8      | fucosyltransferase 8                                                                                          | 0 |
| 1552 | O9WTS6 | Odz3      | odd Oz/ten-m homolog 3 (Drosophila)                                                                           | 0 |
| 1553 | O9WU02 | Avpr1b    | arginine vasopressin receptor 1B                                                                              | 0 |
| 1554 | O9WUB7 | Clcna     | chloride channel Ka                                                                                           | 0 |
| 1555 | O9WUM4 | Coro1c    | coronin, actin binding protein 1C                                                                             | 0 |
| 1556 | O9WUS4 | Gia10     | gap junction protein, alpha 10                                                                                | 0 |
| 1557 | O9WV04 | Kif9      | kinesin family member 9                                                                                       | 0 |
| 1558 | O9WV07 | Aloxe3    | arachidonate lipooxygenase 3                                                                                  | 0 |
| 1559 | O9WV86 | Katna1    | katanin p60 (ATPase-containing) subunit A1                                                                    | 0 |
| 1560 | O9WV82 | IDBG-null | transducin-like enhancer of split 2, homolog of Drosophila E(spl)                                             | 0 |
| 1561 | O9WVG9 | Msl3      | male-specific lethal 3 homolog (Drosophila)                                                                   | 0 |
| 1562 | O9Z0E1 | D6Mm5e    | DNA segment, Chr 6, Miriam Meisler 5, expressed                                                               | 0 |
| 1563 | O9Z0L1 | S1pr4     | sphingosine-1-phosphate receptor 4                                                                            | 0 |
| 1564 | O9Z0S1 | IDBG-null | bisphosphate 3'-nucleotidase 1                                                                                | 0 |
| 1565 | O9Z1B3 | Plcb1     | phospholipase C, beta 1                                                                                       | 0 |
| 1566 | O9Z204 | Hnrnpc    | heterogeneous nuclear ribonucleoprotein C                                                                     | 0 |
| 1567 | O9Z280 | Pld1      | phospholipase D1                                                                                              | 0 |
| 1568 | O9Z2C4 | Mttr1     | myotubularin related protein 1                                                                                | 0 |
| 1569 | O9Z2D7 | Mbd4      | methyl-CpG binding domain protein 4                                                                           | 0 |
| 1570 | O9Z2G6 | Sei1l     | sei-1 suppressor of lin-12-like (C. elegans)                                                                  | 0 |
| 1571 | O9Z2H5 | IDBG-null | erythrocyte protein band 4.1-like 1                                                                           | 0 |
| 1572 | O9Z2I0 | Letm1     | leucine zipper-EF-hand containing transmembrane protein 1                                                     | 0 |
| 1573 | O9Z329 | Itpr2     | inositol 1,4,5-triphosphate receptor 2                                                                        | 0 |

**Table S2. Proteomics-derived nodes and their respective InnateDB-derived experimentally validated binding partner assemble the Pathogen-response network in Cytoscape**

| Proteomics-derived nodes |               | InnateDB-derived interactina partners |             |                                                                               |                    |
|--------------------------|---------------|---------------------------------------|-------------|-------------------------------------------------------------------------------|--------------------|
| Uniprot ID               | Gene ID       | InnateDb ID                           | Gene Symbol | Gene Name                                                                     | Ensembl Gene ID    |
| A2RSY1                   | 4632411B12Rik | 187207                                | Tcfcp2l1    | transcription factor CP2-like 1                                               | ENSMUSG00000026380 |
| Q8C9S4                   | A630007B06Rik | 137550                                | Nova1       | neuro-oncological ventral antigen 1                                           | ENSMUSG00000021047 |
| Q9D2R0                   | Aacs          | 37645                                 | TRAF4       | TNF receptor-associated factor 4                                              | ENSG00000076604    |
| Q9D2R0                   | Aacs          | 141537                                | Foxa1       | forkhead box A1                                                               | ENSMUSG00000035451 |
| P55096                   | Abcd3         | 175455                                | Abcd2       | ATP-binding cassette, sub-family D (ALD), member 2                            | ENSMUSG00000055782 |
| P55096                   | Abcd3         | 153430                                | Abcd1       | ATP-binding cassette, sub-family D (ALD), member 1                            | ENSMUSG00000031378 |
| Q5SWU9                   | Acaca         | 159441                                | Sirt1       | sirtuin 1 (silent mating type information regulation 2, homolog 1)            | ENSMUSG00000020063 |
| Q5SWU9                   | Acaca         | 185563                                | Aicda       | activation-induced cytidine deaminase                                         | ENSMUSG00000040627 |
| Q5SWU9                   | Acaca         | 133323                                | Top2b       | topoisomerase (DNA) II beta                                                   | ENSMUSG00000017485 |
| Q5SWU9                   | Acaca         | 172112                                | Rad50       | RAD50 homolog (S. cerevisiae)                                                 | ENSMUSG00000020380 |
| Q5SWU9                   | Acaca         | 171022                                | Smarca5     | SWI/SNF related, matrix associated, actin dependent regulator of gene control | ENSMUSG00000031715 |
| Q5SWU9                   | Acaca         | 194044                                | Gcn1l1      | GCN1 general control of amino-acid synthesis 1-like 1 (yeast)                 | ENSMUSG00000041638 |
| Q5SWU9                   | Acaca         | 160136                                | Cct3        | chaperonin containing Tcp1, subunit 3 (gamma)                                 | ENSMUSG00000001416 |
| Q5SWU9                   | Acaca         | 176091                                | Tnp1        | transportin 1                                                                 | ENSMUSG00000009470 |
| Q5SWU9                   | Acaca         | 199178                                | Tubb3       | tubulin, beta 3                                                               | ENSMUSG00000062380 |
| P50544                   | Acadvl        | 214604                                | Socs3       | suppressor of cytokine signaling 3                                            | ENSMUSG00000053113 |
| Q91V92                   | Acly          | 200597                                | Ywhae       | tyrosine 3-monooxygenase/tryptophan 5-monooxygenase activator protein 1       | ENSMUSG00000020849 |
| P62737                   | Acta2         | 174739                                | Sv2a        | synaptic vesicle glycoprotein 2 a                                             | ENSMUSG00000038486 |
| P62737                   | Acta2         | 205183                                | Ap2b1       | adaptor-related protein complex 2, beta 1 subunit                             | ENSMUSG00000035152 |
| P62737                   | Acta2         | 180315                                | Ap2a1       | adaptor protein complex AP-2, alpha 1 subunit                                 | ENSMUSG00000060279 |
| P62737                   | Acta2         | 159551                                | Dnm1        | dynamain 1                                                                    | ENSMUSG00000026825 |
| P62737                   | Acta2         | 207019                                | Cltc        | clathrin, heavy polypeptide (Hc)                                              | ENSMUSG00000047126 |
| P62737                   | Acta2         | 143791                                | Ap1b1       | adaptor protein complex AP-1, beta 1 subunit                                  | ENSMUSG00000009090 |
| P62737                   | Acta2         | 135538                                | Syn1        | synapsin I                                                                    | ENSMUSG00000037217 |
| P62737                   | Acta2         | 210393                                | Stx1b       | syntaxin 1B                                                                   | ENSMUSG00000030806 |
| P62737                   | Acta2         | 189699                                | Snap91      | synaptosomal-associated protein 91                                            | ENSMUSG00000033419 |
| P62737                   | Acta2         | 213066                                | Nsf         | N-ethylmaleimide sensitive fusion protein                                     | ENSMUSG00000034187 |
| P62737                   | Acta2         | 27257                                 | LRRK2       | leucine-rich repeat kinase 2                                                  | ENSG00000188906    |
| P62737                   | Acta2         | 132306                                | Cadps       | Ca2+-dependent secretion activator                                            | ENSMUSG00000054423 |
| P62737                   | Acta2         | 154306                                | Casp3       | caspase 3                                                                     | ENSMUSG00000031628 |
| P62737                   | Acta2         | 178813                                | Casp7       | caspase 7                                                                     | ENSMUSG00000025076 |
| P63268                   | Actq2         | 186954                                | Ldha        | lactate dehydrogenase A                                                       | ENSMUSG00000063229 |
| P63268                   | Actq2         | 158996                                | Hdgp        | hepatoma-derived growth factor                                                | ENSMUSG00000004897 |
| P63268                   | Actq2         | 208186                                | Trrap       | transformation/transcription domain-associated protein                        | ENSMUSG00000045482 |
| P63268                   | Actq2         | 190143                                | Ep400       | E1A binding protein p400                                                      | ENSMUSG00000029505 |
| P63268                   | Actq2         | 132192                                | Kat5        | K(lysine) acetyltransferase 5                                                 | ENSMUSG00000024926 |
| P63268                   | Actq2         | 179881                                | Dmap1       | DNA methyltransferase 1-associated protein 1                                  | ENSMUSG00000009640 |
| P63268                   | Actq2         | 182674                                | Ciapin1     | cytokine induced apoptosis inhibitor 1                                        | ENSMUSG00000031781 |
| P63268                   | Actq2         | 135252                                | Brd8        | bromodomain containing 8                                                      | ENSMUSG00000003778 |
| P63268                   | Actq2         | 190649                                | Morf4l1     | mortality factor 4 like 1                                                     | ENSMUSG00000062270 |
| P63268                   | Actq2         | 207470                                | Actb        | actin, beta                                                                   | ENSMUSG00000029580 |
| P63268                   | Actq2         | 136942                                | Actl6a      | actin-like 6A                                                                 | ENSMUSG00000027671 |
| P63268                   | Actq2         | 214779                                | Actg1       | actin, gamma, cytoplasmic 1                                                   | ENSMUSG00000062825 |
| P63268                   | Actq2         | 129480                                | Inq3        | inhibitor of growth family, member 3                                          | ENSMUSG00000029670 |
| P63268                   | Actq2         | 102316                                | VPS72       | vacuolar protein sorting 72 homolog (S. cerevisiae)                           | ENSG00000163159    |
| P63268                   | Actq2         | 127970                                | Epc1        | enhancer of polycomb homolog 1 (Drosophila)                                   | ENSMUSG00000002420 |
| P63268                   | Actq2         | 168697                                | Epc2        | enhancer of polycomb homolog 2 (Drosophila)                                   | ENSMUSG00000069495 |
| Q8R259                   | Actr8         | 78880                                 | BMPR2       | bone morphogenetic protein receptor, type II (serine/threonine kinase)        | ENSG00000204217    |
| Q8R259                   | Actr8         | 158574                                | Bmpr2       | bone morphogenetic protein receptor, type II (serine/threonine kinase)        | ENSMUSG00000067336 |
| Q61824                   | Adam12        | 107634                                | ACTN2       | actinin, alpha 2                                                              | ENSG00000077522    |
| Q61824                   | Adam12        | 214339                                | Grb2        | growth factor receptor bound protein 2                                        | ENSMUSG00000059923 |
| Q61824                   | Adam12        | 137550                                | Nova1       | neuro-oncological ventral antigen 1                                           | ENSMUSG00000021047 |
| Q61824                   | Adam12        | 151540                                | Yes1        | Yamaguchi sarcoma viral (v-yes) oncogene homolog 1                            | ENSMUSG00000014932 |
| Q61824                   | Adam12        | 174586                                | Sh3pxd2a    | SH3 and PX domains 2A                                                         | ENSMUSG00000053617 |
| Q61072                   | Adam9         | 190993                                | Pacsin3     | protein kinase C and casein kinase substrate in neurons 3                     | ENSMUSG00000027257 |
| Q61072                   | Adam9         | 160703                                | Sh3gl2      | SH3-domain GRB2-like 2                                                        | ENSMUSG00000028488 |
| Q61072                   | Adam9         | 79064                                 | ABI2        | abl-interactor 2                                                              | ENSG00000138443    |
| P59511                   | Adams20       | 175763                                | Tal1        | T-cell acute lymphocytic leukemia 1                                           | ENSMUSG00000028717 |
| Q8VHH7                   | Adcy3         | 49995                                 | MPDZ        | multiple PDZ domain protein                                                   | ENSG00000107186    |
| Q8VHH7                   | Adcy3         | 144171                                | Stoml3      | stomatolysin (Epb7.2)-like 3                                                  | ENSMUSG00000027744 |
| P51829                   | Adcy7         | 175763                                | Tal1        | T-cell acute lymphocytic leukemia 1                                           | ENSMUSG00000028717 |
| Q9Z248                   | Aebp2         | 198609                                | Eed         | embryonic ectoderm development                                                | ENSMUSG00000030619 |
| Q9Z248                   | Aebp2         | 187572                                | Mtf2        | metal response element binding transcription factor 2                         | ENSMUSG00000029267 |
| Q9Z248                   | Aebp2         | 190814                                | Rbbp4       | retinoblastoma binding protein 4                                              | ENSMUSG00000057236 |
| Q9Z248                   | Aebp2         | 211954                                | Ezh1        | enhancer of zeste homolog 1 (Drosophila)                                      | ENSMUSG00000006920 |
| Q9Z248                   | Aebp2         | 203783                                | Suz12       | suppressor of zeste 12 homolog (Drosophila)                                   | ENSMUSG00000017548 |
| Q9Z248                   | Aebp2         | 147776                                | Jarid2      | jumonji, AT rich interactive domain 2                                         | ENSMUSG00000038518 |
| Q9Z248                   | Aebp2         | 159635                                | Stk38       | serine/threonine kinase 38                                                    | ENSMUSG00000024006 |
| Q9Z248                   | Aebp2         | 178190                                | Morc3       | microrchidia 3                                                                | ENSMUSG00000039456 |
| Q9Z248                   | Aebp2         | 165162                                | BC018507    | cDNA sequence BC018507                                                        | ENSMUSG00000034525 |
| Q9Z248                   | Aebp2         | 198429                                | Stk38l      | serine/threonine kinase 38 like                                               | ENSMUSG00000016300 |
| Q9Z248                   | Aebp2         | 136486                                | Bclaf1      | BCL2-associated transcription factor 1                                        | ENSMUSG00000037608 |
| Q9Z248                   | Aebp2         | 188132                                | Thrap3      | thyroid hormone receptor associated protein 3                                 | ENSMUSG00000043962 |
| Q9Z248                   | Aebp2         | 163429                                | Ell         | elongation factor RNA polymerase II                                           | ENSMUSG00000070002 |
| Q9Z248                   | Aebp2         | 175374                                | Trim35      | tripartite motif-containing 35                                                | ENSMUSG00000022043 |
| Q9Z248                   | Aebp2         | 153367                                | Setx        | senataxin                                                                     | ENSMUSG00000043535 |
| Q9Z248                   | Aebp2         | 143636                                | Ezh2        | enhancer of zeste homolog 2 (Drosophila)                                      | ENSMUSG00000029687 |
| Q9Z248                   | Aebp2         | 183758                                | Rbbp7       | retinoblastoma binding protein 7                                              | ENSMUSG00000031353 |
| Q8K2K6                   | Aqf1          | 174308                                | Eps15       | epidermal growth factor receptor pathway substrate 15                         | ENSMUSG00000028552 |
| O88312                   | Aqr2          | 165108                                | Anxa4       | annexin A4                                                                    | ENSMUSG00000029994 |
| O88312                   | Aqr2          | 208372                                | Dstn        | desmin                                                                        | ENSMUSG00000015932 |
| O88312                   | Aqr2          | 214220                                | Slc9a3r1    | solute carrier family 9 (sodium/hydrogen exchanger), member 3                 | ENSMUSG00000020733 |
| O88312                   | Aqr2          | 134163                                | Ezr         | ezipin                                                                        | ENSMUSG00000052397 |



|        |         |        |          |                                                                           |                      |
|--------|---------|--------|----------|---------------------------------------------------------------------------|----------------------|
| O88312 | Aqr2    | 143108 | Anxa13   | annexin A13                                                               | ENSMUSG000000055114  |
| O88312 | Aqr2    | 160005 | Lgals2   | lectin, galactose-binding, soluble 2                                      | ENSMUSG000000043501  |
| O88312 | Aqr2    | 180747 | Ces1e    | carboxylesterase 1E                                                       | ENSMUSG000000061959  |
| O88312 | Aqr2    | 131972 | Cfi1     | cofilin 1, non-muscle                                                     | ENSMUSG000000056201  |
| O88312 | Aqr2    | 164732 | Lgals4   | lectin, galactose binding, soluble 4                                      | ENSMUSG000000053964  |
| O88312 | Aqr2    | 195117 | Pfn1     | profilin 1                                                                | ENSMUSG000000018293  |
| O88312 | Aqr2    | 147795 | Ppia     | peptidylprolyl isomerase A                                                | ENSMUSG000000071866  |
| O88312 | Aqr2    | 185682 | Abcq3    | ATP-binding cassette, sub-family G (WHITE), member 3                      | ENSMUSG000000029299  |
| O88312 | Aqr2    | 198471 | Cdc42    | cell division cycle 42 homolog (S. cerevisiae)                            | ENSMUSG00000006699   |
| Q8VC19 | Alas1   | 136414 | Egr1     | early growth response 1                                                   | ENSMUSG000000038418  |
| Q8VC19 | Alas1   | 153395 | Nab1     | Nqfi-A binding protein 1                                                  | ENSMUSG00000002881   |
| Q8VC19 | Alas1   | 195715 | Nab2     | Nqfi-A binding protein 2                                                  | ENSMUSG000000025402  |
| P97793 | Alk     | 132777 | Zc3hc1   | zinc finger, C3HC type 1                                                  | ENSMUSG000000039130  |
| Q8K371 | Amotl2  | 178408 | Pou5f1   | POU domain, class 5, transcription factor 1                               | ENSMUSG000000024406  |
| P53995 | Anapc1  | 12280  | ANAPC4   | anaphase promoting complex subunit 4                                      | ENSG000000053900     |
| P53995 | Anapc1  | 93182  | ANAPC2   | anaphase promoting complex subunit 2                                      | ENSG000000176248     |
| P53995 | Anapc1  | 46810  | CDC23    | cell division cycle 23 homolog (S. cerevisiae)                            | ENSG000000094880     |
| P53995 | Anapc1  | 53861  | CDC16    | cell division cycle 16 homolog (S. cerevisiae)                            | ENSG000000130177     |
| P53995 | Anapc1  | 77869  | ANAPC16  | anaphase promoting complex subunit 16                                     | ENSG000000166295     |
| P53995 | Anapc1  | 81571  | CDC26    | cell division cycle 26 homolog (S. cerevisiae)                            | ENSG000000176386     |
| P53995 | Anapc1  | 39771  | ANAPC10  | anaphase promoting complex subunit 10                                     | ENSG000000164162     |
| P53995 | Anapc1  | 57027  | ANAPC7   | anaphase promoting complex subunit 7                                      | ENSG000000196510     |
| P53995 | Anapc1  | 61638  | ANAPC5   | anaphase promoting complex subunit 5                                      | ENSG000000089053     |
| P53995 | Anapc1  | 97410  | CDC20    | cell division cycle 20 homolog (S. cerevisiae)                            | ENSG000000117399     |
| P53995 | Anapc1  | 65939  | ANAPC1   | anaphase promoting complex subunit 1                                      | ENSG000000153107     |
| P53995 | Anapc1  | 6103   | BUB1B    | budding uninhibited by benzimidazoles 1 homolog beta (y                   | ENSG000000156970     |
| P53995 | Anapc1  | 46694  | KIAA1430 | KIAA1430                                                                  | ENSG000000164323     |
| P53995 | Anapc1  | 55802  | CDC27    | cell division cycle 27 homolog (S. cerevisiae)                            | ENSG000000004897     |
| Q9WVM3 | Anapc7  | 136530 | Pik3ca   | phosphatidylinositol 3-kinase, catalytic, alpha polypeptide               | ENSMUSG000000027665  |
| Q9WVM3 | Anapc7  | 66003  | PIK3CA   | phosphoinositide-3-kinase, catalytic, alpha polypeptide                   | ENSG000000121879     |
| Q9WVM3 | Anapc7  | 127729 | Creml    | cAMP responsive element modulator                                         | ENSMUSG000000063889  |
| Q9WVM3 | Anapc7  | 166231 | Creb3l4  | cAMP responsive element binding protein 3-like 4                          | ENSMUSG000000027938  |
| Q8C016 | Ankrd58 | 174161 | Tcf3     | transcription factor 3                                                    | ENSMUSG000000020167  |
| P35585 | Ap1m1   | 175763 | Tal1     | T-cell acute lymphocytic leukemia 1                                       | ENSMUSG000000028717  |
| P35585 | Ap1m1   | 191480 | Ap1g1    | adaptor protein complex AP-1, gamma 1 subunit                             | ENSMUSG000000031731  |
| P17427 | Ap2a2   | 174308 | Eps15    | epidermal growth factor receptor pathway substrate 15                     | ENSMUSG000000028552  |
| P17427 | Ap2a2   | 12921  | AMPH     | amphiphysin                                                               | ENSG000000078053     |
| P17427 | Ap2a2   | 1770   | SYNJ1    | synaptotagmin 1                                                           | ENSG000000159082     |
| P17427 | Ap2a2   | 189699 | Snap91   | synaptosomal-associated protein 91                                        | ENSMUSG000000033419  |
| P17427 | Ap2a2   | 132340 | Amph     | amphiphysin                                                               | ENSMUSG000000021314  |
| P17427 | Ap2a2   | 159551 | Dnm1     | dynamin 1                                                                 | ENSMUSG000000026825  |
| P17427 | Ap2a2   | 144450 | Ap2m1    | adaptor protein complex AP-2, mu1                                         | ENSMUSG000000022841  |
| P17427 | Ap2a2   | 27257  | LRRK2    | leucine-rich repeat kinase 2                                              | ENSG000000188906     |
| Q9DBG3 | Ap2b1   | 104856 | FASLG    | Fas ligand (TNF superfamily, member 6)                                    | ENSG000000117560     |
| Q9DBG3 | Ap2b1   | 183625 | Snx18    | sorting nexin 18                                                          | ENSMUSG000000042364  |
| Q9DBG3 | Ap2b1   | 168133 | Pacsin2  | protein kinase C and casein kinase substrate in neurons 2                 | ENSMUSG000000016664  |
| Q9DBG3 | Ap2b1   | 190993 | Pacsin3  | protein kinase C and casein kinase substrate in neurons 3                 | ENSMUSG000000027257  |
| Q9DBG3 | Ap2b1   | 177962 | Pip5k1c  | phosphatidylinositol-4-phosphate 5-kinase, type 1 gamma                   | ENSMUSG000000034902  |
| Q9DBG3 | Ap2b1   | 30077  | SNCA     | synuclein, alpha (non A4 component of amyloid precursor                   | ENSG000000145335     |
| Q9DBG3 | Ap2b1   | 207842 | Snap25   | synaptosomal-associated protein 25                                        | ENSMUSG000000027273  |
| Q9DBG3 | Ap2b1   | 183835 | Nckap1   | NCK-associated protein 1                                                  | ENSMUSG000000027002  |
| Q9DBG3 | Ap2b1   | 179812 | Atp1a1   | ATPase, Na <sup>+</sup> /K <sup>+</sup> transporting, alpha 1 polypeptide | ENSMUSG000000033161  |
| Q9DBG3 | Ap2b1   | 168772 | Kif5c    | kinesin family member 5C                                                  | ENSMUSG000000026764  |
| Q9DBG3 | Ap2b1   | 127944 | Kif5b    | kinesin family member 5B                                                  | ENSMUSG000000006740  |
| Q9DBG3 | Ap2b1   | 180315 | Ap2a1    | adaptor protein complex AP-2, alpha 1 subunit                             | ENSMUSG000000060279  |
| Q9DBG3 | Ap2b1   | 131026 | Pacs1    | phosphofurin acidic cluster sorting protein 1                             | ENSMUSG000000024855  |
| Q9DBG3 | Ap2b1   | 200612 | Mtap6    | microtubule-associated protein 6                                          | ENSMUSG000000055407  |
| Q9DBG3 | Ap2b1   | 181984 | Tuba1a   | tubulin, alpha 1A                                                         | ENSMUSG000000072235  |
| Q9DBG3 | Ap2b1   | 170381 | Tuba4a   | tubulin, alpha 4A                                                         | ENSMUSG000000026202  |
| Q9DBG3 | Ap2b1   | 198630 | Hspq2    | perlecan (heparan sulfate proteoglycan 2)                                 | ENSMUSG000000028763  |
| Q9DBG3 | Ap2b1   | 262062 | Gm3272   | predicted pseudogene 3272                                                 | ENSMUSG000000078967  |
| Q9DBG3 | Ap2b1   | 129240 | Syp      | synaptophysin                                                             | ENSMUSG000000031144  |
| Q9DBG3 | Ap2b1   | 143914 | Tubb2a   | tubulin, beta 2A                                                          | ENSMUSG000000058672  |
| Q9DBG3 | Ap2b1   | 191004 | Zfhx3    | zinc finger homeobox 3                                                    | ENSMUSG000000038872  |
| Q9DBG3 | Ap2b1   | 187917 | Atp6v0d1 | ATPase, H <sup>+</sup> transporting, lysosomal V0 subunit D1              | ENSMUSG000000013160  |
| Q9DBG3 | Ap2b1   | 179144 | Tubb5    | tubulin, beta 5                                                           | ENSMUSG000000001525  |
| Q9DBG3 | Ap2b1   | 162096 | Slc2a8   | solute carrier family 2, (facilitated glucose transporter), m             | ENSMUSG000000026791  |
| Q9DBG3 | Ap2b1   | 72930  | ACVR1    | activin A receptor, type I                                                | ENSG000000115170     |
| Q9DBG3 | Ap2b1   | 28871  | SMURF1   | N-ethylmaleimide sensitive fusion protein 1                               | ENSG000000198742     |
| Q9DBG3 | Ap2b1   | 3485   | SMAD4    | SMAD family member 4                                                      | ENSG000000141646     |
| Q9DBG3 | Ap2b1   | 174308 | Eps15    | epidermal growth factor receptor pathway substrate 15                     | ENSMUSG000000028552  |
| Q9DBG3 | Ap2b1   | 193317 | Dlg4     | discs, large homolog 4 (Drosophila)                                       | ENSMUSG000000020886  |
| Q9DBG3 | Ap2b1   | 174739 | Sv2a     | synaptic vesicle glycoprotein 2 a                                         | ENSMUSG000000038486  |
| Q9DBG3 | Ap2b1   | 159551 | Dnm1     | dynamin 1                                                                 | ENSMUSG000000026825  |
| Q9DBG3 | Ap2b1   | 207019 | Cltc     | clathrin, heavy polypeptide (Hc)                                          | ENSMUSG0000000047126 |
| Q9DBG3 | Ap2b1   | 143791 | Ap1b1    | adaptor protein complex AP-1, beta 1 subunit                              | ENSMUSG00000009090   |
| Q9DBG3 | Ap2b1   | 135538 | Syn1     | synapsin I                                                                | ENSMUSG000000037217  |
| Q9DBG3 | Ap2b1   | 210393 | Stx1b    | syntaxin 1B                                                               | ENSMUSG000000030806  |
| Q9DBG3 | Ap2b1   | 189699 | Snap91   | synaptosomal-associated protein 91                                        | ENSMUSG000000033419  |
| Q9DBG3 | Ap2b1   | 213066 | Nsf      | N-ethylmaleimide sensitive fusion protein                                 | ENSMUSG000000034187  |
| Q9DBG3 | Ap2b1   | 27257  | LRRK2    | leucine-rich repeat kinase 2                                              | ENSG000000188906     |
| Q9DBG3 | Ap2b1   | 159493 | Acta2    | actin, alpha 2, smooth muscle, aorta                                      | ENSMUSG000000035783  |
| Q9DBG3 | Ap2b1   | 132306 | Cadps    | Ca <sup>2+</sup> -dependent secretion activator                           | ENSMUSG000000054423  |
| Q03157 | Ap1p1   | 169389 | Dab1     | disabled homolog 1 (Drosophila)                                           | ENSMUSG000000028519  |
| Q03157 | Ap1p1   | 142480 | Pcdh18   | protocadherin 18                                                          | ENSMUSG000000037892  |
| Q03157 | Ap1p1   | 172954 | App      | amyloid beta (A4) precursor protein                                       | ENSMUSG000000022892  |
| Q03157 | Ap1p1   | 196096 | Rasa1    | RAS protein activator like 1 (GAP1 like)                                  | ENSMUSG000000029602  |
| Q03157 | Ap1p1   | 150591 | Prune2   | prune homolog 2 (Drosophila)                                              | ENSMUSG000000039126  |
| Q03157 | Ap1p1   | 183015 | Ppap2a   | phosphatidic acid phosphatase type 2A                                     | ENSMUSG000000021759  |

|        |          |        |           |                                                                                                             |                     |
|--------|----------|--------|-----------|-------------------------------------------------------------------------------------------------------------|---------------------|
| Q03157 | Aplp1    | 169987 | Ppap2c    | phosphatidic acid phosphatase type 2C                                                                       | ENSMUSG00000052151  |
| Q03157 | Aplp1    | 204766 | Vgf       | VGF nerve growth factor inducible                                                                           | ENSMUSG00000037428  |
| Q03157 | Aplp1    | 209151 | Cst3      | cystatin C                                                                                                  | ENSMUSG00000027447  |
| Q03157 | Aplp1    | 185288 | Sparcl1   | SPARC-like 1                                                                                                | ENSMUSG00000029309  |
| Q03157 | Aplp1    | 163151 | Hspa5     | heat shock protein 5                                                                                        | ENSMUSG00000026864  |
| Q03157 | Aplp1    | 155394 | Thy1      | thymus cell antigen 1, theta                                                                                | ENSMUSG00000032011  |
| Q03157 | Aplp1    | 207129 | Spon1     | spondin 1, (F-spondin) extracellular matrix protein                                                         | ENSMUSG00000038156  |
| Q03157 | Aplp1    | 146661 | Aplp2     | amyloid beta (A4) precursor-like protein 2                                                                  | ENSMUSG00000031996  |
| Q03157 | Aplp1    | 211078 | Oat       | ornithine aminotransferase                                                                                  | ENSMUSG00000030934  |
| Q03157 | Aplp1    | 151663 | Mat1a     | methionine adenosyltransferase I, alpha                                                                     | ENSMUSG00000037798  |
| Q03157 | Aplp1    | 129626 | Pdia6     | protein disulfide isomerase associated 6                                                                    | ENSMUSG00000020571  |
| Q03157 | Aplp1    | 131138 | Calu      | calumenin                                                                                                   | ENSMUSG00000029767  |
| Q03157 | Aplp1    | 152814 | Ppp1r2    | protein phosphatase 1, regulatory (inhibitor) subunit 2                                                     | ENSMUSG00000047714  |
| Q03157 | Aplp1    | 196143 | Epb4.1l3  | erythrocyte protein band 4.1-like 3                                                                         | ENSMUSG00000024044  |
| Q03157 | Aplp1    | 178669 | Ppib      | peptidylprolyl isomerase B                                                                                  | ENSMUSG00000032383  |
| Q03157 | Aplp1    | 174959 | Calr      | calreticulin                                                                                                | ENSMUSG0000003814   |
| Q03157 | Aplp1    | 182078 | Hsp90b1   | heat shock protein 90, beta (Grp94), member 1                                                               | ENSMUSG00000020048  |
| Q03157 | Aplp1    | 168591 | Canx      | calnexin                                                                                                    | ENSMUSG00000020368  |
| Q03157 | Aplp1    | 176351 | Cntn1     | contactin 1                                                                                                 | ENSMUSG00000055022  |
| Q03157 | Aplp1    | 163105 | Ncam1     | neuronal cell adhesion molecule 1                                                                           | ENSMUSG00000039542  |
| Q03157 | Aplp1    | 168462 | Rcn2      | reticulocalbin 2                                                                                            | ENSMUSG00000032320  |
| Q03157 | Aplp1    | 205238 | Clstn1    | calsynenin 1                                                                                                | ENSMUSG00000039953  |
| Q03157 | Aplp1    | 182141 | Gabbr1    | gamma-aminobutyric acid (GABA) B receptor, 1                                                                | ENSMUSG00000024462  |
| Q03157 | Aplp1    | 157064 | Hyou1     | hypoxia up-regulated 1                                                                                      | ENSMUSG00000032115  |
| Q03157 | Aplp1    | 171290 | Hspa4     | heat shock protein 4                                                                                        | ENSMUSG00000020361  |
| Q03157 | Aplp1    | 175327 | Sraap3    | SLIT-ROBO Rho GTPase activating protein 3                                                                   | ENSMUSG00000030257  |
| Q03157 | Aplp1    | 141546 | Ganab     | alpha glucosidase 2 alpha neutral subunit                                                                   | ENSMUSG00000071650  |
| Q03157 | Aplp1    | 192274 | Nfasc     | neurofascin                                                                                                 | ENSMUSG00000026442  |
| Q03157 | Aplp1    | 178513 | Atp2b2    | ATPase, Ca++ transporting, plasma membrane 2                                                                | ENSMUSG00000030302  |
| Q03157 | Aplp1    | 146362 | Erp44     | endoplasmic reticulum protein 44                                                                            | ENSMUSG00000028343  |
| Q03157 | Aplp1    | 168858 | Linqo1    | leucine rich repeat and Iq domain containing 1                                                              | ENSMUSG00000049556  |
| Q03157 | Aplp1    | 186875 | Clstn3    | calsynenin 3                                                                                                | ENSMUSG00000008153  |
| Q03157 | Aplp1    | 260830 | Prnp      | prion protein                                                                                               | ENSMUSG00000079037  |
| Q03157 | Aplp1    | 158252 | Cpe       | carboxypeptidase E                                                                                          | ENSMUSG00000037852  |
| Q9WW31 | Arc      | 193317 | Dlq4      | discs, large homolog 4 (Drosophila)                                                                         | ENSMUSG00000020886  |
| Q62431 | Arid3a   | 174501 | Nacc1     | nucleus accumbens associated 1, BEN and BTB (POZ) domain                                                    | ENSMUSG00000001910  |
| Q62431 | Arid3a   | 186053 | Myod1     | myogenic differentiation 1                                                                                  | ENSMUSG00000009471  |
| Q62431 | Arid3a   | 175693 | Smad3     | MAD homolog 3 (Drosophila)                                                                                  | ENSMUSG00000032402  |
| Q62431 | Arid3a   | 190185 | Sfp1      | SFFV proviral integration 1                                                                                 | ENSMUSG00000002111  |
| Q921N7 | Arid3b   | 174501 | Nacc1     | nucleus accumbens associated 1, BEN and BTB (POZ) domain                                                    | ENSMUSG00000001910  |
| Q921N7 | Arid3b   | 178408 | Pou5f1    | POU domain, class 5, transcription factor 1                                                                 | ENSMUSG00000024406  |
| Q921K5 | Arih1    | 138347 | Ube2l3    | ubiquitin-conjugating enzyme E2L 3                                                                          | ENSMUSG00000038965  |
| Q9JM93 | Arl6ip4  | 170048 | Arl6      | ADP-ribosylation factor-like 6                                                                              | ENSMUSG00000022722  |
| Q61324 | Arnt2    | 178400 | Sim2      | single-minded homolog 2 (Drosophila)                                                                        | ENSMUSG00000062713  |
| Q61324 | Arnt2    | 134957 | Ahr       | aryl-hydrocarbon receptor                                                                                   | ENSMUSG000000019256 |
| Q8K0L0 | Asb2     | 144553 | Tceb2     | transcription elongation factor B (SIII), polypeptide 2                                                     | ENSMUSG00000055839  |
| Q8K0L0 | Asb2     | 249823 | Tceb1     | transcription elongation factor B (SIII), polypeptide 1                                                     | ENSMUSG00000079658  |
| Q8CDM1 | Atad2    | 137097 | Hist1h4b  | histone cluster 1, H4b                                                                                      | ENSMUSG00000069266  |
| Q9D906 | Atq7     | 94856  | ATG5      | ATG5 autophagy related 5 homolog (S. cerevisiae)                                                            | ENSG00000057663     |
| Q9D906 | Atq7     | 37900  | ATG12     | ATG12 autophagy related 12 homolog (S. cerevisiae)                                                          | ENSG00000145782     |
| Q9D906 | Atq7     | 32027  | ATG10     | ATG10 autophagy related 10 homolog (S. cerevisiae)                                                          | ENSG00000152348     |
| Q9D906 | Atq7     | 193040 | Gabarap   | gamma-aminobutyric acid receptor associated protein                                                         | ENSMUSG00000018567  |
| Q9D906 | Atq7     | 146271 | Psm3      | proteasome (prosome, macropain) subunit, alpha type 3                                                       | ENSMUSG00000060073  |
| Q9D906 | Atq7     | 196690 | Map1lc3b  | microtubule-associated protein 1 light chain 3 beta                                                         | ENSMUSG00000031812  |
| Q9D906 | Atq7     | 145432 | Atg12     | autophagy-related 12 (yeast)                                                                                | ENSMUSG000000032905 |
| Q9D906 | Atq7     | 193757 | Gabarapl2 | gamma-aminobutyric acid (GABA) A receptor-associated polymerase (DNA directed), delta 2, regulatory subunit | ENSMUSG00000031950  |
| P56480 | Atp5b    | 145597 | Pold2     | polymerase (DNA directed), delta 2, regulatory subunit                                                      | ENSMUSG00000020471  |
| P56480 | Atp5b    | 191542 | Cct2      | chaperonin containing Tcp1, subunit 2 (beta)                                                                | ENSMUSG00000034024  |
| P56480 | Atp5b    | 173563 | Cct8      | chaperonin containing Tcp1, subunit 8 (theta)                                                               | ENSMUSG00000025613  |
| P56480 | Atp5b    | 170572 | Selenbp2  | selenium binding protein 2                                                                                  | ENSMUSG00000068877  |
| P56480 | Atp5b    | 168985 | Aldh1l1   | aldehyde dehydrogenase 1 family, member L1                                                                  | ENSMUSG00000030088  |
| P56480 | Atp5b    | 132917 | Cct5      | chaperonin containing Tcp1, subunit 5 (epsilon)                                                             | ENSMUSG00000022234  |
| P56480 | Atp5b    | 88484  | SET       | SET nuclear oncogene                                                                                        | ENSG00000119335     |
| P56480 | Atp5b    | 153613 | Hspa8     | heat shock protein 8                                                                                        | ENSMUSG00000015656  |
| P56480 | Atp5b    | 207470 | Actb      | actin, beta                                                                                                 | ENSMUSG000000029580 |
| P56480 | Atp5b    | 160648 | Fbp1      | fructose bisphosphatase 1                                                                                   | ENSMUSG00000069805  |
| P56480 | Atp5b    | 147385 | Hnrnpa2b1 | heterogeneous nuclear ribonucleoprotein A2/B1                                                               | ENSMUSG00000004980  |
| P56480 | Atp5b    | 175870 | Mta1      | metastasis associated 1                                                                                     | ENSMUSG00000021144  |
| P56480 | Atp5b    | 178482 | Alb       | albumin                                                                                                     | ENSMUSG00000029368  |
| P56480 | Atp5b    | 136275 | Pygm      | muscle glycogen phosphorylase                                                                               | ENSMUSG00000032648  |
| P56480 | Atp5b    | 137484 | Tcp1      | t-complex protein 1                                                                                         | ENSMUSG00000068039  |
| P56480 | Atp5b    | 209641 | Csnk2a1   | casein kinase 2, alpha 1 polypeptide                                                                        | ENSMUSG00000074698  |
| P56480 | Atp5b    | 163151 | Hspa5     | heat shock protein 5                                                                                        | ENSMUSG00000026864  |
| P56480 | Atp5b    | 140436 | Dnm2      | dynamin 2                                                                                                   | ENSMUSG00000033335  |
| P56480 | Atp5b    | 165898 | Ftcd      | formiminotransferase cyclodeaminase                                                                         | ENSMUSG00000001155  |
| P56480 | Atp5b    | 152187 | Eif2s1    | eukaryotic translation initiation factor 2, subunit 1 alpha                                                 | ENSMUSG00000021116  |
| P56480 | Atp5b    | 145944 | Gm5506    | predicted gene 5506                                                                                         | ENSMUSG00000059040  |
| P56480 | Atp5b    | 145251 | Pdpk1     | 3-phosphoinositide dependent protein kinase 1                                                               | ENSMUSG00000024122  |
| P56480 | Atp5b    | 200597 | Ywhae     | tyrosine 3-monooxygenase/tryptophan 5-monooxygenase                                                         | ENSMUSG00000020849  |
| P56480 | Atp5b    | 193222 | Traf6     | TNF receptor-associated factor 6                                                                            | ENSMUSG00000027164  |
| P56480 | Atp5b    | 155224 | Set       | SET nuclear oncogene                                                                                        | ENSMUSG00000054766  |
| P15920 | Atp6v0a2 | 184401 | Cyth2     | cytohesin 2                                                                                                 | ENSMUSG00000003269  |
| P63082 | Atp6v0c  | 145251 | Pdpk1     | 3-phosphoinositide dependent protein kinase 1                                                               | ENSMUSG00000024122  |
| P63082 | Atp6v0c  | 177451 | Atp6v1g2  | ATPase, H+ transporting, lysosomal V1 subunit G2                                                            | ENSMUSG00000024403  |
| P63082 | Atp6v0c  | 155483 | Atp6v1g1  | ATPase, H+ transporting, lysosomal V1 subunit G1                                                            | ENSMUSG00000039105  |
| P50516 | Atp6v1a  | 30077  | SNCA      | synuclein, alpha (non A4 component of amyloid precursor protein)                                            | ENSG00000145335     |
| P50516 | Atp6v1a  | 193222 | Traf6     | TNF receptor-associated factor 6                                                                            | ENSMUSG00000027164  |
| P50516 | Atp6v1a  | 207470 | Actb      | actin, beta                                                                                                 | ENSMUSG00000029580  |
| P50516 | Atp6v1a  | 165033 | Actn4     | actinin alpha 4                                                                                             | ENSMUSG00000054808  |

|        |          |        |           |                                                             |                      |
|--------|----------|--------|-----------|-------------------------------------------------------------|----------------------|
| P50516 | Atp6v1a  | 153380 | Actn1     | actinin, alpha 1                                            | ENSMUSG00000015143   |
| Q921G3 | Atp6v1c1 | 144539 | Arf6      | ADP-ribosylation factor 6                                   | ENSMUSG00000044147   |
| Q8BMG1 | Atrip    | 191646 | Atr       | ataxia telangiectasia and Rad3 related                      | ENSMUSG00000032409   |
| Q77QH0 | Atxn2l   | 137550 | Nova1     | neuro-oncological ventral antigen 1                         | ENSMUSG00000021047   |
| O88398 | Avil     | 200571 | Crk       | v-crk sarcoma virus CT10 oncogene homolog (avian)           | ENSMUSG00000017776   |
| O88398 | Avil     | 211991 | Ywhab     | tyrosine 3-monooxygenase/tryptophan 5-monooxygenase         | ENSMUSG00000018326   |
| O88398 | Avil     | 153069 | Plec      | plectin                                                     | ENSMUSG00000022565   |
| O88398 | Avil     | 152570 | Ywhah     | tyrosine 3-monooxygenase/tryptophan 5-monooxygenase         | ENSMUSG00000018965   |
| O88398 | Avil     | 135418 | Ywhaz     | tyrosine 3-monooxygenase/tryptophan 5-monooxygenase         | ENSMUSG00000022285   |
| O88398 | Avil     | 130670 | Ywhaq     | tyrosine 3-monooxygenase/tryptophan 5-monooxygenase         | ENSMUSG000000076432  |
| O88398 | Avil     | 204179 | Ywhag     | tyrosine 3-monooxygenase/tryptophan 5-monooxygenase         | ENSMUSG000000051391  |
| O88398 | Avil     | 200597 | Ywhae     | tyrosine 3-monooxygenase/tryptophan 5-monooxygenase         | ENSMUSG000000020849  |
| O88398 | Avil     | 164118 | Pik3r2    | phosphatidylinositol 3-kinase, regulatory subunit, polypep  | ENSMUSG000000031834  |
| O88398 | Avil     | 155970 | Cbl       | Casitas B-lineage lymphoma                                  | ENSMUSG000000034342  |
| Q00993 | Axl      | 176038 | Ifnar1    | interferon (alpha and beta) receptor 1                      | ENSMUSG000000022967  |
| Q00993 | Axl      | 136731 | Il15ra    | interleukin 15 receptor, alpha chain                        | ENSMUSG000000023206  |
| Q00993 | Axl      | 163447 | Il2rg     | interleukin 2 receptor, gamma chain                         | ENSMUSG000000031304  |
| Q00993 | Axl      | 164118 | Pik3r2    | phosphatidylinositol 3-kinase, regulatory subunit, polypep  | ENSMUSG000000031834  |
| Q00993 | Axl      | 152236 | Shc3      | src homology 2 domain-containing transforming protein C     | ENSMUSG000000021448  |
| Q60739 | Bag1     | 185673 | Bcl2      | B-cell leukemia/lymphoma 2                                  | ENSMUSG000000057329  |
| Q60739 | Bag1     | 213115 | Mapt      | microtubule-associated protein tau                          | ENSMUSG000000018411  |
| Q921R2 | Bag6     | 193222 | Traf6     | TNF receptor-associated factor 6                            | ENSMUSG000000027164  |
| Q921R2 | Bag6     | 185529 | Tnfrsf11a | tumor necrosis factor receptor superfamily, member 11a      | ENSMUSG000000026321  |
| Q921R2 | Bag6     | 186305 | Gnai3     | guanine nucleotide binding protein (G protein), alpha inhib | ENSMUSG000000000001  |
| Q921R2 | Bag6     | 96837  | CAP1      | CAP, adenylate cyclase-associated protein 1 (yeast)         | ENSG000000131236     |
| Q921R2 | Bag6     | 185836 | Amelx     | amelogenin X chromosome                                     | ENSMUSG000000031354  |
| Q497V6 | Bahd1    | 212520 | Hdac5     | histone deacetylase 5                                       | ENSMUSG000000008855  |
| Q497V6 | Bahd1    | 188607 | Sp1       | trans-acting transcription factor 1                         | ENSMUSG00000001280   |
| Q497V6 | Bahd1    | 147481 | Cbx3      | chromobox homolog 3 (Drosophila HP1 gamma)                  | ENSMUSG000000029836  |
| Q497V6 | Bahd1    | 158060 | Mbd1      | methyl-CpG binding domain protein 1                         | ENSMUSG000000024561  |
| Q80VH0 | Bank1    | 163730 | Traf1     | TNF receptor-associated factor 1                            | ENSMUSG000000026875  |
| Q80VH0 | Bank1    | 211637 | Stat3     | signal transducer and activator of transcription 3          | ENSMUSG000000004040  |
| Q99PU7 | Bag1     | 52172  | BRCA1     | breast cancer 1, early onset                                | ENSG00000012048      |
| Q99PU7 | Bag1     | 38830  | BAP1      | BRCA1 associated protein-1 (ubiquitin carboxy-terminal h    | ENSG000000163930     |
| Q99PU7 | Bag1     | 34785  | ASXL2     | additional sex combs like 2 (Drosophila)                    | ENSG000000143970     |
| Q99PU7 | Bag1     | 90667  | HCFC1     | host cell factor C1 (VP16-accessory protein)                | ENSG000000172534     |
| Q99PU7 | Bag1     | 65101  | ASXL1     | additional sex combs like 1 (Drosophila)                    | ENSG000000171456     |
| Q9CWF6 | Bbs2     | 130227 | Bbs1      | Bardet-Biedl syndrome 1 (human)                             | ENSMUSG000000006464  |
| Q9CWF6 | Bbs2     | 172547 | Bbs4      | Bardet-Biedl syndrome 4 (human)                             | ENSMUSG000000025235  |
| Q9CWF6 | Bbs2     | 138825 | Bbs7      | Bardet-Biedl syndrome 7 (human)                             | ENSMUSG000000037325  |
| Q61140 | Bcar1    | 44570  | SRCIN1    | SRC kinase signaling inhibitor 1                            | ENSG000000017373     |
| Q61140 | Bcar1    | 197036 | Stat2     | signal transducer and activator of transcription 2          | ENSMUSG000000040033  |
| Q61140 | Bcar1    | 210259 | Srcin1    | SRC kinase signaling inhibitor 1                            | ENSMUSG000000038453  |
| Q61140 | Bcar1    | 148322 | Ptk2      | PTK2 protein tyrosine kinase 2                              | ENSMUSG000000022607  |
| Q61140 | Bcar1    | 144629 | Fyn       | Fyn proto-oncogene                                          | ENSMUSG0000000019843 |
| Q61140 | Bcar1    | 205088 | Nphp1     | nephronophthisis 1 (juvenile) homolog (human)               | ENSMUSG000000027378  |
| Q61140 | Bcar1    | 128365 | Lyn       | Yamaquchi sarcoma viral (v-yes-1) oncogene homolog          | ENSMUSG000000042228  |
| Q61140 | Bcar1    | 80957  | PTPN1     | protein tyrosine phosphatase, non-receptor type 1           | ENSG000000196396     |
| Q61140 | Bcar1    | 200571 | Crk       | v-crk sarcoma virus CT10 oncogene homolog (avian)           | ENSMUSG000000017776  |
| Q61140 | Bcar1    | 193200 | Nck1      | non-catalytic region of tyrosine kinase adaptor protein 1   | ENSMUSG000000032475  |
| P41183 | Bcl6     | 158082 | Ppard     | peroxisome proliferator activator receptor delta            | ENSMUSG000000002250  |
| P41183 | Bcl6     | 167001 | Gzmb      | granzyme B                                                  | ENSMUSG000000015437  |
| P41183 | Bcl6     | 196509 | Irf8      | interferon regulatory factor 8                              | ENSMUSG0000000041515 |
| P41183 | Bcl6     | 204473 | Ccl2      | chemokine (C-C motif) ligand 2                              | ENSMUSG000000035385  |
| P41183 | Bcl6     | 144970 | Il6       | interleukin 6                                               | ENSMUSG0000000025746 |
| P41183 | Bcl6     | 205910 | Il1a      | interleukin 1 alpha                                         | ENSMUSG000000027399  |
| P41183 | Bcl6     | 185535 | Csf1      | colony stimulating factor 1 (macrophage)                    | ENSMUSG000000014599  |
| P41183 | Bcl6     | 193997 | Rplp0     | ribosomal protein, large, P0                                | ENSMUSG000000067274  |
| P41183 | Bcl6     | 211937 | Ifitm1    | interferon induced transmembrane protein 1                  | ENSMUSG0000000025491 |
| P41183 | Bcl6     | 158624 | Batf      | basic leucine zipper transcription factor, ATF-like         | ENSMUSG000000034266  |
| P41183 | Bcl6     | 193813 | Bcl6b     | B-cell CLL/lymphoma 6, member B                             | ENSMUSG000000000317  |
| Q921K9 | Bcl7b    | 62116  | BCL7A     | B-cell CLL/lymphoma 7A                                      | ENSG000000110987     |
| Q921K9 | Bcl7b    | 19936  | BCL7B     | B-cell CLL/lymphoma 7B                                      | ENSG000000106635     |
| Q921K9 | Bcl7b    | 99249  | PHF10     | PHD finger protein 10                                       | ENSG000000130024     |
| Q921K9 | Bcl7b    | 66303  | ACTL6A    | actin-like 6A                                               | ENSG000000136518     |
| Q921K9 | Bcl7b    | 40152  | SMARCC2   | SWI/SNF related, matrix associated, actin dependent regu    | ENSG000000139613     |
| Q921K9 | Bcl7b    | 44200  | SMARCA2   | SWI/SNF related, matrix associated, actin dependent regu    | ENSG000000080503     |
| Q921K9 | Bcl7b    | 39289  | PBRM1     | polybromo 1                                                 | ENSG000000163939     |
| Q921K9 | Bcl7b    | 63787  | SMARCD2   | SWI/SNF related, matrix associated, actin dependent regu    | ENSG000000108604     |
| Q921K9 | Bcl7b    | 32344  | SMARCD1   | SWI/SNF related, matrix associated, actin dependent regu    | ENSG000000066117     |
| Q921K9 | Bcl7b    | 2584   | SMARCB1   | SWI/SNF related, matrix associated, actin dependent regu    | ENSG000000099956     |
| Q921K9 | Bcl7b    | 31858  | SMARCC1   | SWI/SNF related, matrix associated, actin dependent regu    | ENSG000000173473     |
| Q921K9 | Bcl7b    | 28398  | ARID2     | AT rich interactive domain 2 (ARID, RFX-like)               | ENSG000000189079     |
| Q921K9 | Bcl7b    | 94691  | ARID1A    | AT rich interactive domain 1A (SWI-like)                    | ENSG000000117713     |
| Q921K9 | Bcl7b    | 47847  | SMARCE1   | SWI/SNF related, matrix associated, actin dependent regu    | ENSG000000073584     |
| Q921K9 | Bcl7b    | 98322  | ARID1B    | AT rich interactive domain 1B (SWI1-like)                   | ENSG000000049618     |
| Q921K9 | Bcl7b    | 1783   | SS18      | synovial sarcoma translocation, chromosome 18               | ENSG000000141380     |
| Q921K9 | Bcl7b    | 28592  | SMARCA4   | SWI/SNF related, matrix associated, actin dependent regu    | ENSG000000127616     |
| Q921K9 | Bcl7b    | 30500  | BRD7      | bromodomain containing 7                                    | ENSG000000166164     |
| Q921K9 | Bcl7b    | 56871  | DPF2      | D4, zinc and double PHD fingers family 2                    | ENSG000000133884     |
| Q67FY2 | Bcl9l    | 27347  | CTNNB1    | catenin (cadherin-associated protein), beta 1, 88kDa        | ENSG000000168036     |
| Q67FY2 | Bcl9l    | 101829 | BCL9      | B-cell CLL/lymphoma 9                                       | ENSG000000116128     |
| Q9QUN3 | Blnk     | 196950 | Banp      | BTG3 associated nuclear protein                             | ENSMUSG000000025316  |
| Q9QUN3 | Blnk     | 191455 | Sh3q1l    | SH3-domain GRB2-like 1                                      | ENSMUSG000000003200  |
| Q9QUN3 | Blnk     | 182475 | Sh3kbp1   | SH3-domain kinase binding protein 1                         | ENSMUSG000000040990  |
| Q9QUN3 | Blnk     | 163809 | Grap2     | GRB2-related adaptor protein 2                              | ENSMUSG000000042351  |
| Q9QUN3 | Blnk     | 79651  | BTk       | Bruton agammaglobulinemia tyrosine kinase                   | ENSG00000010671      |
| Q9QUN3 | Blnk     | 165583 | Itk       | IL2-inducible T-cell kinase                                 | ENSMUSG000000020395  |
| Q9QUN3 | Blnk     | 185361 | Cmtm3     | CKLF-like MARVEL transmembrane domain containing 3          | ENSMUSG000000031875  |

|        |         |        |           |                                                                                  |                     |
|--------|---------|--------|-----------|----------------------------------------------------------------------------------|---------------------|
| Q9QUN3 | Blnk    | 195070 | Plcq2     | phospholipase C, gamma 2                                                         | ENSMUSG000000034330 |
| Q9QUN3 | Blnk    | 165254 | Map4k1    | mitogen-activated protein kinase kinase kinase 1                                 | ENSMUSG000000037337 |
| Q9QUN3 | Blnk    | 137672 | Mapk1     | mitogen-activated protein kinase 1                                               | ENSMUSG000000063358 |
| Q9QUN3 | Blnk    | 171427 | Btk       | Brunton agammaglobulinemia tyrosine kinase                                       | ENSMUSG000000031264 |
| Q9QUN3 | Blnk    | 214339 | Grb2      | growth factor receptor bound protein 2                                           | ENSMUSG000000059923 |
| Q35607 | Bmpr2   | 200741 | Arrb1     | arrestin, beta 1                                                                 | ENSMUSG000000018909 |
| Q35607 | Bmpr2   | 129000 | Cav1      | caveolin 1, caveolae protein                                                     | ENSMUSG000000076555 |
| Q35607 | Bmpr2   | 149689 | Bmpr1a    | bone morphogenetic protein receptor, type 1A                                     | ENSMUSG000000021796 |
| Q35607 | Bmpr2   | 166211 | Gnb2l1    | guanine nucleotide binding protein (G protein), beta polypeptide 2               | ENSMUSG000000020372 |
| Q35607 | Bmpr2   | 30667  | BMPR1B    | bone morphogenetic protein receptor, type IB                                     | ENSG00000138696     |
| Q35607 | Bmpr2   | 78488  | TGFBR1    | transforming growth factor, beta receptor 1                                      | ENSG00000106799     |
| Q35607 | Bmpr2   | 145653 | Nbea      | neurobeachin                                                                     | ENSMUSG000000027799 |
| Q35607 | Bmpr2   | 203344 | Lmx1a     | LIM homeobox transcription factor 1 alpha                                        | ENSMUSG000000026686 |
| Q35607 | Bmpr2   | 176204 | Sult1e1   | sulfotransferase family 1E, member 1                                             | ENSMUSG000000029272 |
| Q35607 | Bmpr2   | 212561 | Lsp1      | lymphocyte specific 1                                                            | ENSMUSG000000018819 |
| Q35607 | Bmpr2   | 191539 | Trpc1     | transient receptor potential cation channel, subfamily C, member 1               | ENSMUSG000000032839 |
| Q35607 | Bmpr2   | 179144 | Tubb5     | tubulin, beta 5                                                                  | ENSMUSG000000015255 |
| Q35607 | Bmpr2   | 165484 | Rabqgta   | Rab geranylgeranyl transferase, a subunit                                        | ENSMUSG000000040472 |
| Q35607 | Bmpr2   | 173205 | Pdzrn3    | PDZ domain containing RING finger 3                                              | ENSMUSG000000035357 |
| Q35607 | Bmpr2   | 194374 | Topbp1    | topoisomerase (DNA) II binding protein 1                                         | ENSMUSG000000032555 |
| Q35607 | Bmpr2   | 208976 | Prkcb     | protein kinase C, beta                                                           | ENSMUSG000000052889 |
| Q35607 | Bmpr2   | 168192 | Serpina3k | serine (or cysteine) peptidase inhibitor, clade A, member 3k                     | ENSMUSG000000058207 |
| Q35607 | Bmpr2   | 190275 | C4bp      | complement component 4 binding protein                                           | ENSMUSG000000026405 |
| Q35607 | Bmpr2   | 177408 | Twf1      | twinfilin, actin-binding protein, homolog 1 (Drosophila)                         | ENSMUSG000000022451 |
| Q35607 | Bmpr2   | 205458 | Mertk     | c-mer proto-oncogene tyrosine kinase                                             | ENSMUSG000000014361 |
| Q35607 | Bmpr2   | 127807 | Map3k8    | mitogen-activated protein kinase kinase kinase 8                                 | ENSMUSG000000024235 |
| Q35607 | Bmpr2   | 149050 | Pmpca     | peptidase (mitochondrial processing) alpha                                       | ENSMUSG000000026926 |
| Q35607 | Bmpr2   | 145713 | Oc90      | otoconin 90                                                                      | ENSMUSG000000015001 |
| Q35607 | Bmpr2   | 142069 | Actr8     | ARF8 actin-related protein 8 homolog (S. cerevisiae)                             | ENSMUSG000000015971 |
| Q35607 | Bmpr2   | 271528 | Mos       | Moloney sarcoma oncogene                                                         | ENSMUSG000000078365 |
| Q35607 | Bmpr2   | 189460 | Frs3      | fibroblast growth factor receptor substrate 3                                    | ENSMUSG000000023266 |
| Q35607 | Bmpr2   | 152845 | Ctbp1     | C-terminal binding protein 1                                                     | ENSMUSG000000037373 |
| Q35607 | Bmpr2   | 198834 | Ccdc89    | coiled-coil domain containing 89                                                 | ENSMUSG000000044362 |
| Q35607 | Bmpr2   | 164070 | Cryab     | crystallin, alpha B                                                              | ENSMUSG000000032060 |
| Q35607 | Bmpr2   | 180668 | Ces1d     | carboxylesterase 1D                                                              | ENSMUSG000000056973 |
| Q8R3B7 | Brd8    | 132192 | Kat5      | K(lysine) acetyltransferase 5                                                    | ENSMUSG000000024926 |
| Q8R3B7 | Brd8    | 200139 | Mga       | MAX gene associated                                                              | ENSMUSG000000033943 |
| Q8R3B7 | Brd8    | 151154 | Wdr5      | WD repeat domain 5                                                               | ENSMUSG000000026917 |
| Q8R3B7 | Brd8    | 173862 | Pcgf6     | polycomb group ring finger 6                                                     | ENSMUSG000000025050 |
| Q8R3B7 | Brd8    | 128962 | Mycn      | v-myc myelocytomatosis viral related oncogene, neuroblastoma specific 1          | ENSMUSG000000037169 |
| Q8R3B7 | Brd8    | 164939 | L3mbtl2   | l(3)mbt-like 2 (Drosophila)                                                      | ENSMUSG000000023294 |
| Q8R3B7 | Brd8    | 136942 | Actl6a    | actin-like 6A                                                                    | ENSMUSG000000027671 |
| Q8R3B7 | Brd8    | 198115 | Rnf2      | ring finger protein 2                                                            | ENSMUSG000000026484 |
| Q8R3B7 | Brd8    | 176488 | Mxi1      | Max interacting protein 1                                                        | ENSMUSG000000025025 |
| Q8R3B7 | Brd8    | 199023 | Mnt       | max binding protein                                                              | ENSMUSG000000000282 |
| Q8R3B7 | Brd8    | 179881 | Dmap1     | DNA methyltransferase 1-associated protein 1                                     | ENSMUSG000000009640 |
| Q8R3B7 | Brd8    | 151490 | Max       | Max protein                                                                      | ENSMUSG000000059436 |
| Q8R3B7 | Brd8    | 144556 | Myc       | myelocytomatosis oncogene                                                        | ENSMUSG000000022346 |
| Q8R3B7 | Brd8    | 190143 | Ep400     | E1A binding protein p400                                                         | ENSMUSG000000029505 |
| Q8R3B7 | Brd8    | 150618 | Hspa2     | heat shock protein 2                                                             | ENSMUSG000000059970 |
| Q8R3B7 | Brd8    | 208186 | Trrap     | transformation/transcription domain-associated protein                           | ENSMUSG000000045482 |
| Q8R3B7 | Brd8    | 186954 | Ldha      | lactate dehydrogenase A                                                          | ENSMUSG000000063229 |
| Q8R3B7 | Brd8    | 158996 | Hdgf      | hepatoma-derived growth factor                                                   | ENSMUSG000000004897 |
| Q8R3B7 | Brd8    | 182674 | Ciapin1   | cytokine induced apoptosis inhibitor 1                                           | ENSMUSG000000031781 |
| Q8R3B7 | Brd8    | 190649 | Morf4l1   | mortality factor 4 like 1                                                        | ENSMUSG000000062270 |
| Q8R3B7 | Brd8    | 161272 | Actq2     | actin, gamma 2, smooth muscle, enteric                                           | ENSMUSG000000059430 |
| Q8R3B7 | Brd8    | 207470 | Actb      | actin, beta                                                                      | ENSMUSG000000029580 |
| Q8R3B7 | Brd8    | 214779 | Actq1     | actin, gamma, cytoplasmic 1                                                      | ENSMUSG000000062825 |
| Q8R3B7 | Brd8    | 129480 | Inq3      | inhibitor of growth family, member 3                                             | ENSMUSG000000029670 |
| Q8R3B7 | Brd8    | 102316 | VPS72     | vacuolar protein sorting 72 homolog (S. cerevisiae)                              | ENSG00000163159     |
| Q8R3B7 | Brd8    | 127970 | Epc1      | enhancer of polycomb homolog 1 (Drosophila)                                      | ENSMUSG000000024240 |
| Q8R3B7 | Brd8    | 168697 | Epc2      | enhancer of polycomb homolog 2 (Drosophila)                                      | ENSMUSG000000069495 |
| Q8R3B7 | Brd8    | 187207 | Tcfcp2l1  | transcription factor CP2-like 1                                                  | ENSMUSG000000026380 |
| Q8R3B7 | Brd8    | 159268 | Esrrb     | estrogen related receptor, beta                                                  | ENSMUSG000000021255 |
| Q3UQU0 | Brd9    | 155600 | Smarca2   | SWI/SNF related, matrix associated, actin dependent regulator of transcription 2 | ENSMUSG000000024921 |
| Q3UQU0 | Brd9    | 141000 | Smarca4   | SWI/SNF related, matrix associated, actin dependent regulator of transcription 4 | ENSMUSG000000032187 |
| Q91Y44 | Brdt    | 194960 | Hist1h4j  | histone cluster 1, H4j                                                           | ENSMUSG000000067455 |
| Q99N20 | Brms1   | 191058 | Hdac1     | histone deacetylase 1                                                            | ENSMUSG000000028800 |
| Q99N20 | Brms1   | 145703 | Gck       | glucokinase                                                                      | ENSMUSG000000041798 |
| Q80X66 | Btbd10  | 107751 | AKT3      | v-akt murine thymoma viral oncogene homolog 3 (protein kinase)                   | ENSG00000117020     |
| Q80X66 | Btbd10  | 174623 | Akt1      | thymoma viral proto-oncogene 1                                                   | ENSMUSG00000001729  |
| Q80X66 | Btbd10  | 161456 | Akt2      | thymoma viral proto-oncogene 2                                                   | ENSMUSG00000004056  |
| Q80X66 | Btbd10  | 206738 | Akt3      | thymoma viral proto-oncogene 3                                                   | ENSMUSG000000019699 |
| Q9ES83 | Bves    | 194400 | Arhgef25  | Rho guanine nucleotide exchange factor (GEF) 25                                  | ENSMUSG000000019467 |
| Q9ES30 | C1qtnf3 | 175763 | Tal1      | T-cell acute lymphocytic leukemia 1                                              | ENSMUSG000000028717 |
| Q99246 | Cacna1d | 193657 | Tubb4     | tubulin, beta 4                                                                  | ENSMUSG000000062591 |
| Q99246 | Cacna1d | 199519 | Cacna1e   | calcium channel, voltage-dependent, R type, alpha 1E subunit                     | ENSMUSG000000004110 |
| Q99246 | Cacna1d | 136841 | Matr3     | matrin 3                                                                         | ENSMUSG000000037236 |
| Q99246 | Cacna1d | 182053 | Tuba1c    | tubulin, alpha 1C                                                                | ENSMUSG000000043091 |
| Q99246 | Cacna1d | 199779 | Acta1     | actin, alpha 1, skeletal muscle                                                  | ENSMUSG000000031972 |
| Q99246 | Cacna1d | 170902 | Cacnb4    | calcium channel, voltage-dependent, beta 4 subunit                               | ENSMUSG000000017412 |
| Q8VHW2 | Cacnq8  | 153567 | Gria2     | glutamate receptor, ionotropic, AMPA2 (alpha 2)                                  | ENSMUSG000000033981 |
| Q8VHW2 | Cacnq8  | 136511 | Hspa9     | heat shock protein 9                                                             | ENSMUSG000000024359 |
| Q8VHW2 | Cacnq8  | 140717 | Gria3     | glutamate receptor, ionotropic, AMPA3 (alpha 3)                                  | ENSMUSG000000019886 |
| Q8VHW2 | Cacnq8  | 175573 | Gria1     | glutamate receptor, ionotropic, AMPA1 (alpha 1)                                  | ENSMUSG000000020524 |
| Q8VHW2 | Cacnq8  | 212876 | Cttn      | cortactin                                                                        | ENSMUSG000000031078 |
| Q9WVG6 | Carm1   | 133993 | Ncoa2     | nuclear receptor coactivator 2                                                   | ENSMUSG000000058886 |
| Q9WVG6 | Carm1   | 205243 | Cttnb1    | catenin (cadherin associated protein), beta 1                                    | ENSMUSG00000006932  |
| Q9WVG6 | Carm1   | 18826  | PIAS1     | protein inhibitor of activated STAT, 1                                           | ENSG000000033800    |

|        |         |        |           |                                                                                                                          |                     |
|--------|---------|--------|-----------|--------------------------------------------------------------------------------------------------------------------------|---------------------|
| Q9WVG6 | Carm1   | 192287 | Grip1     | glutamate receptor interacting protein 1                                                                                 | ENSMUSG00000034813  |
| Q9WVG6 | Carm1   | 170220 | Mef2c     | myocyte enhancer factor 2C                                                                                               | ENSMUSG00000005583  |
| Q9WVG6 | Carm1   | 127933 | Ncoa1     | nuclear receptor coactivator 1                                                                                           | ENSMUSG00000020647  |
| Q9WVG6 | Carm1   | 201030 | Zfp106    | zinc finger protein 106                                                                                                  | ENSMUSG00000027288  |
| Q9WVG6 | Carm1   | 212832 | Ncoa3     | nuclear receptor coactivator 3                                                                                           | ENSMUSG00000027678  |
| Q9WVG6 | Carm1   | 134833 | Tnik      | TRAF2 and NCK interacting kinase                                                                                         | ENSMUSG00000027692  |
| Q9WVG6 | Carm1   | 180861 | Zc3h13    | zinc finger CCCH type containing 13                                                                                      | ENSMUSG00000022000  |
| Q9WVG6 | Carm1   | 186169 | Zfp326    | zinc finger protein 326                                                                                                  | ENSMUSG00000029290  |
| Q9WVG6 | Carm1   | 139346 | Mllt10    | myeloid/lymphoid or mixed-lineage leukemia (trithorax homolog)                                                           | ENSMUSG00000026743  |
| Q9WVG6 | Carm1   | 201862 | Smarcc1   | SWI/SNF related, matrix associated, actin dependent regulator of transcription 1                                         | ENSMUSG00000032481  |
| Q9WVG6 | Carm1   | 267922 | Smarcd2   | SWI/SNF related, matrix associated, actin dependent regulator of transcription 2                                         | ENSMUSG00000078619  |
| Q9WVG6 | Carm1   | 181503 | Flii      | flightless I homolog (Drosophila)                                                                                        | ENSMUSG00000002812  |
| Q9WVG6 | Carm1   | 143983 | Trim28    | tripartite motif-containing 28                                                                                           | ENSMUSG00000005566  |
| Q9WVG6 | Carm1   | 129915 | Rbm14     | RNA binding motif protein 14                                                                                             | ENSMUSG00000006456  |
| Q9WVG6 | Carm1   | 196765 | Mybbp1a   | MYB binding protein (P160) 1a                                                                                            | ENSMUSG000000040463 |
| Q9WVG6 | Carm1   | 137755 | Wtap      | Wilms' tumour 1-associating protein                                                                                      | ENSMUSG000000060475 |
| Q9WVG6 | Carm1   | 135895 | Ubr5      | ubiquitin protein ligase E3 component n-recognin 5                                                                       | ENSMUSG000000037487 |
| Q9WVG6 | Carm1   | 175749 | Dot1l     | DOT1-like, histone H3 methyltransferase (S. cerevisiae)                                                                  | ENSMUSG000000061589 |
| Q9WVG6 | Carm1   | 169383 | Rif1      | Rap1 interacting factor 1 homolog (yeast)                                                                                | ENSMUSG00000036202  |
| Q9WVG6 | Carm1   | 197552 | Smarcc2   | SWI/SNF related, matrix associated, actin dependent regulator of transcription 2                                         | ENSMUSG00000025369  |
| Q9WVG6 | Carm1   | 207801 | Atad3a    | ATPase family, AAA domain containing 3A                                                                                  | ENSMUSG00000029036  |
| Q9WVG6 | Carm1   | 130805 | Rbm28     | RNA binding motif protein 28                                                                                             | ENSMUSG00000029701  |
| Q9WVG6 | Carm1   | 176882 | Chd1l     | chromodomain helicase DNA binding protein 1-like                                                                         | ENSMUSG000000028089 |
| Q9WVG6 | Carm1   | 195347 | Arid1a    | AT rich interactive domain 1A (SWI-like)                                                                                 | ENSMUSG00000007880  |
| Q9WVG6 | Carm1   | 187693 | Wdr47     | WD repeat domain 47                                                                                                      | ENSMUSG000000040389 |
| Q9WVG6 | Carm1   | 156674 | Tcf4      | transcription factor 4                                                                                                   | ENSMUSG00000053477  |
| Q9WVG6 | Carm1   | 171022 | Smarca5   | SWI/SNF related, matrix associated, actin dependent regulator of transcription factor 7-like 2, T-cell specific, HMG-box | ENSMUSG000000031715 |
| Q9WVG6 | Carm1   | 177837 | Tcf7l2    | transcription factor 7-like 2, T-cell specific, HMG-box                                                                  | ENSMUSG00000024985  |
| Q9WVG6 | Carm1   | 154815 | Axin1     | axin 1                                                                                                                   | ENSMUSG000000024182 |
| Q9WVG6 | Carm1   | 136038 | Hist1h3q  | histone cluster 1, H3q                                                                                                   | ENSMUSG000000062417 |
| P70677 | Casp3   | 27347  | CTNNB1    | catenin (cadherin-associated protein), beta 1, 88kDa                                                                     | ENSG00000168036     |
| P70677 | Casp3   | 11235  | PSEN1     | presenilin 1                                                                                                             | ENSG000000080815    |
| P70677 | Casp3   | 107053 | PSEN2     | presenilin 2 (Alzheimer disease 4)                                                                                       | ENSG00000143801     |
| P70677 | Casp3   | 205936 | IL1b      | interleukin 1 beta                                                                                                       | ENSMUSG000000027398 |
| P70677 | Casp3   | 37408  | THAP11    | THAP domain containing 11                                                                                                | ENSG00000168286     |
| P70677 | Casp3   | 4054   | GZMB      | granzyme B (granzyme 2, cytotoxic T-lymphocyte-associated protein 10)                                                    | ENSG00000100453     |
| P70677 | Casp3   | 167001 | Gzmb      | granzyme B                                                                                                               | ENSMUSG00000015437  |
| P70677 | Casp3   | 156033 | Htt       | huntingtin                                                                                                               | ENSMUSG000000029104 |
| P70677 | Casp3   | 164070 | Cryab     | crystallin, alpha B                                                                                                      | ENSMUSG000000032060 |
| P70677 | Casp3   | 133177 | Birc3     | baculoviral IAP repeat-containing 3                                                                                      | ENSMUSG000000032000 |
| P70677 | Casp3   | 200597 | Ywhae     | tyrosine 3-monooxygenase/tryptophan 5-monooxygenase activator protein 1                                                  | ENSMUSG00000020849  |
| P70677 | Casp3   | 159848 | Cdkn1a    | cyclin-dependent kinase inhibitor 1A (P21)                                                                               | ENSMUSG00000023067  |
| P70677 | Casp3   | 173276 | Pkm2      | pyruvate kinase, muscle                                                                                                  | ENSMUSG000000032294 |
| P70677 | Casp3   | 180339 | D6Wsu116e | DNA segment, Chr 6, Wayne State University 116, expressed in testis                                                      | ENSMUSG000000024104 |
| P70677 | Casp3   | 159493 | Acta2     | actin, alpha 2, smooth muscle, aorta                                                                                     | ENSMUSG000000035783 |
| P70677 | Casp3   | 207194 | Parp1     | poly (ADP-ribose) polymerase family, member 1                                                                            | ENSMUSG00000026496  |
| P70677 | Casp3   | 191568 | Nucks1    | nuclear casein kinase and cyclin-dependent kinase substrate 1                                                            | ENSMUSG000000026434 |
| P70677 | Casp3   | 168573 | Rps18     | ribosomal protein S18                                                                                                    | ENSMUSG00000008668  |
| P70677 | Casp3   | 158996 | HdGF      | hepatoma-derived growth factor                                                                                           | ENSMUSG00000004897  |
| P70343 | Casp4   | 11235  | PSEN1     | presenilin 1                                                                                                             | ENSG000000080815    |
| P70343 | Casp4   | 131590 | Casp1     | caspase 1                                                                                                                | ENSMUSG00000025888  |
| Q8CFW7 | Cc2d2a  | 198038 | Tctn1     | tectonic family member 1                                                                                                 | ENSMUSG000000038593 |
| Q8CFW7 | Cc2d2a  | 136801 | Ahl1      | Abelson helper integration site 1                                                                                        | ENSMUSG000000019986 |
| Q8CFW7 | Cc2d2a  | 181938 | Tuba1b    | tubulin, alpha 1B                                                                                                        | ENSMUSG000000023004 |
| Q8CFW7 | Cc2d2a  | 211364 | Jup       | junction plakoglobin                                                                                                     | ENSMUSG000000001552 |
| Q8CFW7 | Cc2d2a  | 207470 | Actb      | actin, beta                                                                                                              | ENSMUSG000000029580 |
| Q8CFW7 | Cc2d2a  | 153613 | Hspa8     | heat shock protein 8                                                                                                     | ENSMUSG000000015656 |
| Q8CFW7 | Cc2d2a  | 163151 | Hspa5     | heat shock protein 5                                                                                                     | ENSMUSG000000026864 |
| Q8CFW7 | Cc2d2a  | 172055 | Hsp90aa1  | heat shock protein 90, alpha (cytosolic), class A member 1                                                               | ENSMUSG000000021270 |
| Q8CFW7 | Cc2d2a  | 146462 | Invs      | inversin                                                                                                                 | ENSMUSG000000028344 |
| Q8CFW7 | Cc2d2a  | 136511 | Hspa9     | heat shock protein 9                                                                                                     | ENSMUSG000000024359 |
| Q8CFW7 | Cc2d2a  | 179144 | Tubb5     | tubulin, beta 5                                                                                                          | ENSMUSG00000001525  |
| Q8CFW7 | Cc2d2a  | 207771 | Mks1      | Meckel syndrome, type 1                                                                                                  | ENSMUSG000000034121 |
| Q8CFW7 | Cc2d2a  | 149554 | Fhl2      | four and a half LIM domains 2                                                                                            | ENSMUSG000000008136 |
| Q8CFW7 | Cc2d2a  | 173563 | Cct8      | chaperonin containing Tcp1, subunit 8 (theta)                                                                            | ENSMUSG000000025613 |
| Q8CFW7 | Cc2d2a  | 185482 | Hsp90ab1  | heat shock protein 90 alpha (cytosolic), class B member 1                                                                | ENSMUSG000000023944 |
| Q9CZX2 | Ccdc123 | 167851 | Pspc1     | paraspeckle protein 1                                                                                                    | ENSMUSG000000021938 |
| Q8C9M2 | Ccdc15  | 35510  | EIF4B     | eukaryotic translation initiation factor 4B                                                                              | ENSG00000063046     |
| Q8C9M2 | Ccdc15  | 73948  | HNRNPK    | heterogeneous nuclear ribonucleoprotein K                                                                                | ENSG00000165119     |
| Q8C9M2 | Ccdc15  | 41511  | NACA      | nascent polypeptide-associated complex alpha subunit                                                                     | ENSG00000196531     |
| Q8C9M2 | Ccdc15  | 21497  | C1QBP     | complement component 1, q subcomponent binding protein 1                                                                 | ENSG00000108561     |
| Q8C9M2 | Ccdc15  | 99568  | SERBP1    | SERPINE1 mRNA binding protein 1                                                                                          | ENSG00000142864     |
| Q8C9M2 | Ccdc15  | 21100  | HMGB1     | high mobility group box 1                                                                                                | ENSG00000189403     |
| Q8C9M2 | Ccdc15  | 27917  | FUS       | fused in sarcoma                                                                                                         | ENSG00000089280     |
| Q8C9M2 | Ccdc15  | 88484  | SET       | SET nuclear oncogene                                                                                                     | ENSG00000119335     |
| Q8C9M2 | Ccdc15  | 14955  | PTMS      | parathyrosin                                                                                                             | ENSG00000159335     |
| Q8C9M2 | Ccdc15  | 15159  | PPIA      | peptidylprolyl isomerase A (cyclophilin A)                                                                               | ENSG00000196262     |
| Q8C9M2 | Ccdc15  | 54713  | PYGM      | phosphorylase, glycogen, muscle                                                                                          | ENSG00000068976     |
| Q8C9M2 | Ccdc15  | 51019  | AHNAK     | AHNAK nucleoprotein                                                                                                      | ENSG00000124942     |
| Q9JIG7 | Ccdc22  | 235293 | CPNE1     | copine I                                                                                                                 | ENSG00000214078     |
| Q9JIG7 | Ccdc22  | 56698  | CPNE4     | copine IV                                                                                                                | ENSG00000196353     |
| P24860 | Ccnb1   | 160472 | Cdk1      | cyclin-dependent kinase 1                                                                                                | ENSMUSG000000019942 |
| P24860 | Ccnb1   | 204417 | Dedd      | death effector domain-containing                                                                                         | ENSMUSG000000013973 |
| P24860 | Ccnb1   | 161037 | Ptch1     | patched homolog 1                                                                                                        | ENSMUSG000000021466 |
| P24860 | Ccnb1   | 137597 | Pura      | purine rich element binding protein A                                                                                    | ENSMUSG000000043991 |
| P24860 | Ccnb1   | 159848 | Cdkn1a    | cyclin-dependent kinase inhibitor 1A (P21)                                                                               | ENSMUSG00000023067  |
| P24860 | Ccnb1   | 145650 | Ccnf      | cyclin F                                                                                                                 | ENSMUSG000000072082 |
| P24860 | Ccnb1   | 140083 | Rfp14     | ret finger protein-like 4                                                                                                | ENSMUSG000000035191 |
| P24860 | Ccnb1   | 176557 | Gadd45b   | growth arrest and DNA-damage-inducible 45 beta                                                                           | ENSMUSG000000015312 |

|        |         |        |           |                                                                                                            |                    |
|--------|---------|--------|-----------|------------------------------------------------------------------------------------------------------------|--------------------|
| P24860 | Ccnb1   | 138469 | Ube2a     | ubiquitin-conjugating enzyme E2A, RAD6 homolog (S. cerevisiae)                                             | ENSMUSG00000016308 |
| P24860 | Ccnb1   | 152599 | Gadd45g   | growth arrest and DNA-damage-inducible 45 gamma                                                            | ENSMUSG00000021453 |
| P24860 | Ccnb1   | 153723 | Gadd45a   | growth arrest and DNA-damage-inducible 45 alpha                                                            | ENSMUSG00000036390 |
| P24860 | Ccnb1   | 159441 | Sirt1     | sirtuin 1 (silent mating type information regulation 2, homolog 1)                                         | ENSMUSG00000020063 |
| P51944 | Ccnf    | 25262  | CCNB1     | cyclin B1                                                                                                  | ENSG00000134057    |
| P51944 | Ccnf    | 178679 | Ccnb1     | cyclin B1                                                                                                  | ENSMUSG00000041431 |
| Q9QWV9 | Ccnt1   | 144556 | Myc       | myelocytomatosis oncogene                                                                                  | ENSMUSG00000022346 |
| Q9QWV9 | Ccnt1   | 151490 | Max       | Max protein                                                                                                | ENSMUSG00000059436 |
| Q9QWV9 | Ccnt1   | 175749 | Dot1l     | DOT1-like, histone H3 methyltransferase (S. cerevisiae)                                                    | ENSMUSG00000061589 |
| P80316 | Cct5    | 145597 | Pold2     | polymerase (DNA directed), delta 2, regulatory subunit                                                     | ENSMUSG00000020471 |
| P80316 | Cct5    | 191542 | Cct2      | chaperonin containing Tcp1, subunit 2 (beta)                                                               | ENSMUSG00000034024 |
| P80316 | Cct5    | 173563 | Cct8      | chaperonin containing Tcp1, subunit 8 (theta)                                                              | ENSMUSG00000025613 |
| P80316 | Cct5    | 170572 | Selenbp2  | selenium binding protein 2                                                                                 | ENSMUSG00000068877 |
| P80316 | Cct5    | 168985 | Aldh1l1   | aldehyde dehydrogenase 1 family, member L1                                                                 | ENSMUSG00000030088 |
| P80316 | Cct5    | 88484  | SET       | SET nuclear oncogene                                                                                       | ENSG00000119335    |
| P80316 | Cct5    | 153613 | Hspa8     | heat shock protein 8                                                                                       | ENSMUSG00000015656 |
| P80316 | Cct5    | 207470 | Actb      | actin, beta                                                                                                | ENSMUSG00000029580 |
| P80316 | Cct5    | 160648 | Fbp1      | fructose bisphosphatase 1                                                                                  | ENSMUSG00000069805 |
| P80316 | Cct5    | 196497 | Atp5b     | ATP synthase, H+ transporting mitochondrial F1 complex, beta subunit                                       | ENSMUSG00000025393 |
| P80316 | Cct5    | 147385 | Hnrnpa2b1 | heterogeneous nuclear ribonucleoprotein A2/B1                                                              | ENSMUSG00000049800 |
| P80316 | Cct5    | 175870 | Mta1      | metastasis associated 1                                                                                    | ENSMUSG00000021144 |
| P80316 | Cct5    | 178482 | Alb       | albumin                                                                                                    | ENSMUSG00000029368 |
| P80316 | Cct5    | 136275 | Pygm      | muscle glycogen phosphorylase                                                                              | ENSMUSG00000032648 |
| P80316 | Cct5    | 137484 | Tcp1      | t-complex protein 1                                                                                        | ENSMUSG00000068039 |
| P80316 | Cct5    | 209641 | Csnk2a1   | casein kinase 2, alpha 1 polypeptide                                                                       | ENSMUSG00000074698 |
| P80316 | Cct5    | 163151 | Hspa5     | heat shock protein 5                                                                                       | ENSMUSG00000026864 |
| P80316 | Cct5    | 140436 | Dnm2      | dynamin 2                                                                                                  | ENSMUSG00000033335 |
| P80316 | Cct5    | 165898 | Ftcd      | formiminotransferase cyclodeaminase                                                                        | ENSMUSG00000001155 |
| P80316 | Cct5    | 152187 | Eif2s1    | eukaryotic translation initiation factor 2, subunit 1 alpha                                                | ENSMUSG00000021116 |
| P80316 | Cct5    | 145944 | Gm5506    | predicted gene 5506                                                                                        | ENSMUSG00000059040 |
| P80316 | Cct5    | 170145 | Theg      | testicular haploid expressed gene                                                                          | ENSMUSG00000020317 |
| P80316 | Cct5    | 185563 | Aicda     | activation-induced cytidine deaminase                                                                      | ENSMUSG00000040627 |
| P80316 | Cct5    | 174830 | Tripl2    | thyroid hormone receptor interactor 12                                                                     | ENSMUSG00000026219 |
| P80316 | Cct5    | 150449 | Wapal     | wings apart-like homolog (Drosophila)                                                                      | ENSMUSG00000041408 |
| P80316 | Cct5    | 129416 | Dnase1    | deoxyribonuclease I                                                                                        | ENSMUSG00000005980 |
| P80316 | Cct5    | 197552 | Smarcc2   | SWI/SNF related, matrix associated, actin dependent regulator of chromatin subunit family class B member 2 | ENSMUSG00000025369 |
| P80316 | Cct5    | 179125 | Pold1     | polymerase (DNA directed), delta 1, catalytic subunit                                                      | ENSMUSG00000038644 |
| P80316 | Cct5    | 129626 | Pdia6     | protein disulfide isomerase associated 6                                                                   | ENSMUSG00000020571 |
| P80316 | Cct5    | 196509 | Irf8      | interferon regulatory factor 8                                                                             | ENSMUSG00000041515 |
| P80316 | Cct5    | 130609 | Glyr1     | glyoxylate reductase 1 homolog (Arabidopsis)                                                               | ENSMUSG00000022536 |
| P80316 | Cct5    | 168861 | Nfkbid    | nuclear factor of kappa light polypeptide gene enhancer in B-cells 1                                       | ENSMUSG00000036931 |
| P80316 | Cct5    | 176913 | Pdcd4     | programmed cell death 4                                                                                    | ENSMUSG00000024975 |
| P80316 | Cct5    | 204629 | Cct6b     | chaperonin containing Tcp1, subunit 6b (zeta)                                                              | ENSMUSG00000020698 |
| P80316 | Cct5    | 188705 | Actr3     | ARP3 actin-related protein 3 homolog (yeast)                                                               | ENSMUSG00000026341 |
| P80316 | Cct5    | 190825 | Ptbp2     | polypyrimidine tract binding protein 2                                                                     | ENSMUSG00000028134 |
| P80316 | Cct5    | 190814 | Rbbp4     | retinoblastoma binding protein 4                                                                           | ENSMUSG00000057236 |
| P80316 | Cct5    | 196636 | Metap1    | methionyl aminopeptidase 1                                                                                 | ENSMUSG00000005813 |
| P80316 | Cct5    | 214779 | Actg1     | actin, gamma, cytoplasmic 1                                                                                | ENSMUSG00000062825 |
| P80316 | Cct5    | 139206 | Orc5      | origin recognition complex, subunit 5                                                                      | ENSMUSG00000029012 |
| P80316 | Cct5    | 159868 | Pdk3      | pyruvate dehydrogenase kinase, isoenzyme 3                                                                 | ENSMUSG00000035232 |
| P80316 | Cct5    | 202025 | Cct6a     | chaperonin containing Tcp1, subunit 6a (zeta)                                                              | ENSMUSG00000029447 |
| P80316 | Cct5    | 155224 | Set       | SET nuclear oncogene                                                                                       | ENSMUSG00000054766 |
| P80316 | Cct5    | 790    | ACTB      | actin, beta                                                                                                | ENSG00000075624    |
| P80317 | Cct6a   | 132917 | Cct5      | chaperonin containing Tcp1, subunit 5 (epsilon)                                                            | ENSMUSG00000022234 |
| P80317 | Cct6a   | 191542 | Cct2      | chaperonin containing Tcp1, subunit 2 (beta)                                                               | ENSMUSG00000034024 |
| P80317 | Cct6a   | 790    | ACTB      | actin, beta                                                                                                | ENSG00000075624    |
| Q61390 | Cct6b   | 185563 | Aicda     | activation-induced cytidine deaminase                                                                      | ENSMUSG00000040627 |
| Q61390 | Cct6b   | 174830 | Tripl2    | thyroid hormone receptor interactor 12                                                                     | ENSMUSG00000026219 |
| Q61390 | Cct6b   | 150449 | Wapal     | wings apart-like homolog (Drosophila)                                                                      | ENSMUSG00000041408 |
| Q61390 | Cct6b   | 129416 | Dnase1    | deoxyribonuclease I                                                                                        | ENSMUSG00000005980 |
| Q61390 | Cct6b   | 197552 | Smarcc2   | SWI/SNF related, matrix associated, actin dependent regulator of chromatin subunit family class B member 2 | ENSMUSG00000025369 |
| Q61390 | Cct6b   | 179125 | Pold1     | polymerase (DNA directed), delta 1, catalytic subunit                                                      | ENSMUSG00000038644 |
| Q61390 | Cct6b   | 132917 | Cct5      | chaperonin containing Tcp1, subunit 5 (epsilon)                                                            | ENSMUSG00000022234 |
| Q61390 | Cct6b   | 129626 | Pdia6     | protein disulfide isomerase associated 6                                                                   | ENSMUSG00000020571 |
| Q61390 | Cct6b   | 196509 | Irf8      | interferon regulatory factor 8                                                                             | ENSMUSG00000041515 |
| Q61390 | Cct6b   | 130609 | Glyr1     | glyoxylate reductase 1 homolog (Arabidopsis)                                                               | ENSMUSG00000022536 |
| Q61390 | Cct6b   | 168861 | Nfkbid    | nuclear factor of kappa light polypeptide gene enhancer in B-cells 1                                       | ENSMUSG00000036931 |
| Q61390 | Cct6b   | 176913 | Pdcd4     | programmed cell death 4                                                                                    | ENSMUSG00000024975 |
| Q61390 | Cct6b   | 188705 | Actr3     | ARP3 actin-related protein 3 homolog (yeast)                                                               | ENSMUSG00000026341 |
| Q61390 | Cct6b   | 190825 | Ptbp2     | polypyrimidine tract binding protein 2                                                                     | ENSMUSG00000028134 |
| Q61390 | Cct6b   | 190814 | Rbbp4     | retinoblastoma binding protein 4                                                                           | ENSMUSG00000057236 |
| Q61390 | Cct6b   | 196636 | Metap1    | methionyl aminopeptidase 1                                                                                 | ENSMUSG00000005813 |
| Q61390 | Cct6b   | 214779 | Actg1     | actin, gamma, cytoplasmic 1                                                                                | ENSMUSG00000062825 |
| Q61390 | Cct6b   | 139206 | Orc5      | origin recognition complex, subunit 5                                                                      | ENSMUSG00000029012 |
| Q61390 | Cct6b   | 159868 | Pdk3      | pyruvate dehydrogenase kinase, isoenzyme 3                                                                 | ENSMUSG00000035232 |
| P80313 | Cct7    | 253522 | Ssca1     | Siogren's syndrome/scleroderma autoantigen 1 homolog                                                       | ENSMUSG00000079478 |
| P80313 | Cct7    | 63625  | PDCL3     | phosducin-like 3                                                                                           | ENSG00000115539    |
| P80313 | Cct7    | 42196  | PDCD5     | programmed cell death 5                                                                                    | ENSG00000105185    |
| P80313 | Cct7    | 56424  | CCT7      | chaperonin containing TCP1, subunit 7 (eta)                                                                | ENSG00000135624    |
| P80313 | Cct7    | 790    | ACTB      | actin, beta                                                                                                | ENSG00000075624    |
| P80313 | Cct7    | 154117 | Cct4      | chaperonin containing Tcp1, subunit 4 (delta)                                                              | ENSMUSG00000007739 |
| P80313 | Cct7    | 137484 | Tcp1      | t-complex protein 1                                                                                        | ENSMUSG00000068039 |
| P80313 | Cct7    | 181984 | Tuba1a    | tubulin, alpha 1A                                                                                          | ENSMUSG00000072235 |
| Q8CJ91 | Cd209b  | 156729 | Tlr4      | toll-like receptor 4                                                                                       | ENSMUSG00000039005 |
| Q8CJ91 | Cd209b  | 135441 | Ly96      | lymphocyte antigen 96                                                                                      | ENSMUSG00000025779 |
| Q3U497 | Cd300lb | 152298 | Hsf1      | heat shock factor 2                                                                                        | ENSMUSG00000019878 |
| Q08857 | Cd36    | 60317  | PXN       | paxillin                                                                                                   | ENSG00000089159    |
| Q08857 | Cd36    | 37147  | PTK2      | PTK2 protein tyrosine kinase 2                                                                             | ENSG00000169398    |
| Q08857 | Cd36    | 408826 | LYN       | v-yes-1 Yamaquchi sarcoma viral related oncogene homolog                                                   | ENSG00000254087    |

|        |          |        |           |                                                                                  |                     |
|--------|----------|--------|-----------|----------------------------------------------------------------------------------|---------------------|
| P30306 | Cdc25b   | 211991 | Ywhab     | tyrosine 3-monooxygenase/tryptophan 5-monooxygenase                              | ENSMUSG00000018326  |
| P30306 | Cdc25b   | 170772 | Btrc      | beta-transducin repeat containing protein                                        | ENSMUSG00000025217  |
| P30306 | Cdc25b   | 48355  | CDC25B    | cell division cycle 25 homolog B (S. pombe)                                      | ENSG000001101224    |
| Q9DC48 | Cdc40    | 3127   | SMAD2     | SMAD family member 2                                                             | ENSG00000175387     |
| Q9DC48 | Cdc40    | 28871  | SMURF1    | SMAD specific E3 ubiquitin protein ligase 1                                      | ENSG00000198742     |
| Q9JM96 | Cdc42ep4 | 78488  | TGFBR1    | transforming growth factor, beta receptor 1                                      | ENSG00000106799     |
| Q9JM96 | Cdc42ep4 | 198471 | Cdc42     | cell division cycle 42 homolog (S. cerevisiae)                                   | ENSMUSG00000006699  |
| Q9JM96 | Cdc42ep4 | 201284 | Rhoq      | ras homolog gene family, member Q                                                | ENSMUSG00000024143  |
| Q8BHX3 | Cdca8    | 28278  | AURKB     | aurora kinase B                                                                  | ENSG00000178999     |
| Q8BHX3 | Cdca8    | 97345  | EBNA1BP2  | EBNA1 binding protein 2                                                          | ENSG00000117395     |
| Q8BHX3 | Cdca8    | 68185  | MRP57     | mitochondrial ribosomal protein S7                                               | ENSG00000125445     |
| Q8BHX3 | Cdca8    | 96468  | CDCA8     | cell division cycle associated 8                                                 | ENSG00000134690     |
| Q8BHX3 | Cdca8    | 75847  | SIRT1     | sirtuin 1                                                                        | ENSG00000096717     |
| Q8BHX3 | Cdca8    | 21497  | CIQBP     | complement component 1, q subcomponent binding protein                           | ENSG00000108561     |
| Q8BHX3 | Cdca8    | 14949  | RSL1D1    | ribosomal L1 domain containing 1                                                 | ENSG00000171490     |
| O35495 | Cdk14    | 128200 | Ccny      | cyclin Y                                                                         | ENSMUSG00000024286  |
| O35495 | Cdk14    | 28871  | SMURF1    | SMAD specific E3 ubiquitin protein ligase 1                                      | ENSG00000198742     |
| O35495 | Cdk14    | 72930  | ACVR1     | activin A receptor, type I                                                       | ENSG00000115170     |
| O35495 | Cdk14    | 30667  | BMPR1B    | bone morphogenetic protein receptor, type IB                                     | ENSG00000138696     |
| O35495 | Cdk14    | 78488  | TGFBR1    | transforming growth factor, beta receptor 1                                      | ENSG00000106799     |
| Q04735 | Cdk16    | 204311 | Cdk5r1    | cyclin-dependent kinase 5, regulatory subunit 1 (p35)                            | ENSMUSG00000048895  |
| Q8CEQ0 | Cdk1     | 28871  | SMURF1    | SMAD specific E3 ubiquitin protein ligase 1                                      | ENSG00000198742     |
| Q8CEQ0 | Cdk1     | 78488  | TGFBR1    | transforming growth factor, beta receptor 1                                      | ENSG00000106799     |
| P18111 | Cdx1     | 194292 | Lef1      | lymphoid enhancer binding factor 1                                               | ENSMUSG00000027985  |
| P18111 | Cdx1     | 89861  | TCF7L2    | transcription factor 7-like 2 (T-cell specific, HMG-box)                         | ENSG00000148737     |
| P18111 | Cdx1     | 178967 | Dlx1      | distal-less homeobox 1                                                           | ENSMUSG00000041911  |
| P18111 | Cdx1     | 167770 | Zfp82     | zinc finger protein 82                                                           | ENSMUSG00000058447  |
| P18111 | Cdx1     | 159505 | Gtf2e1    | general transcription factor II E, polypeptide 1 (alpha subunit)                 | ENSMUSG00000022828  |
| P18111 | Cdx1     | 192631 | Alx4      | aristaless-like homeobox 4                                                       | ENSMUSG00000040310  |
| P18111 | Cdx1     | 168197 | Nkx2-3    | NK2 transcription factor related, locus 3 (Drosophila)                           | ENSMUSG00000044220  |
| Q9R0M0 | Celsr2   | 137550 | Nova1     | neuro-oncological ventral antigen 1                                              | ENSMUSG00000021047  |
| A2AL36 | Cep110   | 1814   | SNAP29    | synaptosomal-associated protein, 29kDa                                           | ENSG00000099940     |
| A2AL36 | Cep110   | 83228  | CNTRL     | centriolin                                                                       | ENSG00000119397     |
| A2AL36 | Cep110   | 65969  | GOLGA3    | golgin A3                                                                        | ENSG00000090615     |
| A2AL36 | Cep110   | 83359  | RAB14     | RAB14, member RAS oncogene family                                                | ENSG00000119396     |
| Q8BT07 | Cep55    | 6303   | C15orf23  | chromosome 15 open reading frame 23                                              | ENSG00000128944     |
| Q8BT07 | Cep55    | 35022  | TSG101    | tumor susceptibility gene 101                                                    | ENSG00000074319     |
| Q8BT07 | Cep55    | 49752  | VPS37C    | vacuolar protein sorting 37 homolog C (S. cerevisiae)                            | ENSG00000167987     |
| Q8BT07 | Cep55    | 75344  | CDK1      | cyclin-dependent kinase 1                                                        | ENSG00000170312     |
| Q8BT07 | Cep55    | 107733 | CEP170    | centrosomal protein 170kDa                                                       | ENSG00000143702     |
| Q8BT07 | Cep55    | 88484  | SET       | SET nuclear oncogene                                                             | ENSG00000119335     |
| Q8BT07 | Cep55    | 63034  | GNB2L1    | guanine nucleotide binding protein (G protein), beta polypeptide 2               | ENSG00000204628     |
| Q8BT07 | Cep55    | 36955  | SPAG5     | sperm associated antigen 5                                                       | ENSG00000076382     |
| Q8BT07 | Cep55    | 35659  | HNRNPA1L2 | heterogeneous nuclear ribonucleoprotein A1-like 2                                | ENSG00000139675     |
| Q8BT07 | Cep55    | 52353  | IKBIP     | IKKKB interacting protein                                                        | ENSG00000166130     |
| Q8BT07 | Cep55    | 82762  | CEP55     | centrosomal protein 55kDa                                                        | ENSG00000138180     |
| Q8BT07 | Cep55    | 40909  | VPS28     | vacuolar protein sorting 28 homolog (S. cerevisiae)                              | ENSG00000160948     |
| Q8BT07 | Cep55    | 55131  | PCBP1     | poly(rC) binding protein 1                                                       | ENSG00000169564     |
| Q8BT07 | Cep55    | 106888 | FBXO28    | F-box protein 28                                                                 | ENSG00000143756     |
| Q8BT07 | Cep55    | 50740  | FTH1      | ferritin, heavy polypeptide 1                                                    | ENSG00000167996     |
| Q8BT07 | Cep55    | 24373  | PDCD6IP   | programmed cell death 6 interacting protein                                      | ENSG00000170248     |
| P18760 | Cf1      | 38695  | SSH2      | shingholin homolog 2 (Drosophila)                                                | ENSG00000141298     |
| P18760 | Cf1      | 55527  | SSH1      | shingholin homolog 1 (Drosophila)                                                | ENSG00000084112     |
| P18760 | Cf1      | 165108 | Anxa4     | annexin A4                                                                       | ENSMUSG00000029994  |
| P18760 | Cf1      | 208372 | Dstn      | desmin                                                                           | ENSMUSG000000015932 |
| P18760 | Cf1      | 214220 | Slc9a3r1  | solute carrier family 9 (sodium/hydrogen exchanger), member 3                    | ENSMUSG00000020733  |
| P18760 | Cf1      | 134163 | Ezr       | ezzrin                                                                           | ENSMUSG00000052397  |
| P18760 | Cf1      | 143108 | Anxa13    | annexin A13                                                                      | ENSMUSG000000055114 |
| P18760 | Cf1      | 160005 | Lgals2    | lectin, galactose-binding, soluble 2                                             | ENSMUSG00000043501  |
| P18760 | Cf1      | 180747 | Ces1e     | carboxylesterase 1E                                                              | ENSMUSG000000061959 |
| P18760 | Cf1      | 164732 | Lgals4    | lectin, galactose binding, soluble 4                                             | ENSMUSG00000053964  |
| P18760 | Cf1      | 195117 | Pfn1      | profilin 1                                                                       | ENSMUSG00000018293  |
| P18760 | Cf1      | 147795 | Ppia      | peptidylprolyl isomerase A                                                       | ENSMUSG000000071866 |
| P18760 | Cf1      | 185682 | Abcq3     | ATP-binding cassette, sub-family G (WHITE), member 3                             | ENSMUSG00000029299  |
| P18760 | Cf1      | 135063 | Agr2      | anterior gradient 2 (Xenopus laevis)                                             | ENSMUSG000000020581 |
| P18760 | Cf1      | 198471 | Cdc42     | cell division cycle 42 homolog (S. cerevisiae)                                   | ENSMUSG00000006699  |
| Q9CXF7 | Chd1     | 156674 | Tcf4      | transcription factor 4                                                           | ENSMUSG00000053477  |
| Q9CXF7 | Chd1     | 205243 | Cttnb1    | catenin (cadherin associated protein), beta 1                                    | ENSMUSG00000006932  |
| Q9CXF7 | Chd1     | 134833 | Tnik      | TRAF2 and NCK interacting kinase                                                 | ENSMUSG00000027692  |
| Q9CXF7 | Chd1     | 180861 | Zc3h13    | zinc finger CCHC type containing 13                                              | ENSMUSG00000022000  |
| Q9CXF7 | Chd1     | 186169 | Zfp326    | zinc finger protein 326                                                          | ENSMUSG00000029290  |
| Q9CXF7 | Chd1     | 139346 | Mllt10    | myeloid/lymphoid or mixed-lineage leukemia (trithorax homolog)                   | ENSMUSG00000026743  |
| Q9CXF7 | Chd1     | 201862 | Smarcc1   | SWI/SNF related, matrix associated, actin dependent regulator of transcription 1 | ENSMUSG00000032481  |
| Q9CXF7 | Chd1     | 267922 | Smarcd2   | SWI/SNF related, matrix associated, actin dependent regulator of transcription 2 | ENSMUSG00000078619  |
| Q9CXF7 | Chd1     | 181503 | Flii      | flightless I homolog (Drosophila)                                                | ENSMUSG00000002812  |
| Q9CXF7 | Chd1     | 143983 | Trim28    | tripartite motif-containing 28                                                   | ENSMUSG00000005566  |
| Q9CXF7 | Chd1     | 129915 | Rbm14     | RNA binding motif protein 14                                                     | ENSMUSG00000006456  |
| Q9CXF7 | Chd1     | 196765 | Mybbp1a   | MYB binding protein (P160) 1a                                                    | ENSMUSG00000040463  |
| Q9CXF7 | Chd1     | 137755 | Wtap      | Wilms' tumour 1-associating protein                                              | ENSMUSG00000060475  |
| Q9CXF7 | Chd1     | 135895 | Ubr5      | ubiquitin protein ligase E3 component n-recognin 5                               | ENSMUSG00000037487  |
| Q9CXF7 | Chd1     | 175749 | Dot1l     | DOT1-like, histone H3 methyltransferase (S. cerevisiae)                          | ENSMUSG00000061589  |
| Q9CXF7 | Chd1     | 169383 | Rif1      | Rap1 interacting factor 1 homolog (yeast)                                        | ENSMUSG00000036202  |
| Q9CXF7 | Chd1     | 197552 | Smarcc2   | SWI/SNF related, matrix associated, actin dependent regulator of transcription 2 | ENSMUSG00000025369  |
| Q9CXF7 | Chd1     | 207801 | Atad3a    | ATPase family, AAA domain containing 3A                                          | ENSMUSG00000029036  |
| Q9CXF7 | Chd1     | 130805 | Rbm28     | RNA binding motif protein 28                                                     | ENSMUSG000000029701 |
| Q9CXF7 | Chd1     | 140748 | Carm1     | coactivator-associated arginine methyltransferase 1                              | ENSMUSG00000032185  |
| Q9CXF7 | Chd1     | 195347 | Arid1a    | AT rich interactive domain 1A (SWI-like)                                         | ENSMUSG00000007880  |
| Q9CXF7 | Chd1     | 187693 | Wdr47     | WD repeat domain 47                                                              | ENSMUSG00000040389  |
| Q9CXF7 | Chd1     | 171022 | Smarca5   | SWI/SNF related, matrix associated, actin dependent regulator of transcription 5 | ENSMUSG00000031715  |

|        |         |        |          |                                                                  |                     |
|--------|---------|--------|----------|------------------------------------------------------------------|---------------------|
| Q9CXF7 | Chd1    | 177837 | Tcf7l2   | transcription factor 7-like 2, T-cell specific, HMG-box          | ENSMUSG00000024985  |
| Q9Z265 | Chek2   | 46567  | BRD8     | bromodomain containing 8                                         | ENSG00000112983     |
| Q9Z265 | Chek2   | 84955  | STK38    | serine/threonine kinase 38                                       | ENSG00000112079     |
| Q9Z265 | Chek2   | 25854  | JPH1     | junctophilin 1                                                   | ENSG00000104369     |
| Q9Z265 | Chek2   | 3314   | CHEK2    | CHK2 checkpoint homolog (S. pombe)                               | ENSG00000183765     |
| Q80XD1 | Chn2    | 163843 | Efna4    | ephrin A4                                                        | ENSMUSG00000028040  |
| Q80XD1 | Chn2    | 142164 | Epha1    | Eph receptor A1                                                  | ENSMUSG00000029859  |
| Q80XD1 | Chn2    | 78488  | TGFBR1   | transforming growth factor, beta receptor 1                      | ENSG00000106799     |
| Q9Z261 | Cldn7   | 211994 | Wnk4     | WNK lysine deficient protein kinase 4                            | ENSMUSG00000035112  |
| Q9Z261 | Cldn7   | 191302 | Tjp1     | tight junction protein 1                                         | ENSMUSG00000030516  |
| Q99JH7 | Clstn3  | 209151 | Cst3     | cystatin C                                                       | ENSMUSG00000027447  |
| Q99JH7 | Clstn3  | 185288 | Sparcl1  | SPARC-like 1                                                     | ENSMUSG00000029309  |
| Q99JH7 | Clstn3  | 168935 | Aplp1    | amyloid beta (A4) precursor-like protein 1                       | ENSMUSG00000006651  |
| Q99JH7 | Clstn3  | 163151 | Hspa5    | heat shock protein 5                                             | ENSMUSG00000026864  |
| Q99JH7 | Clstn3  | 155394 | Thy1     | thymus cell antigen 1, theta                                     | ENSMUSG00000032011  |
| Q99JH7 | Clstn3  | 207129 | Spon1    | spondin 1, (f-spondin) extracellular matrix protein              | ENSMUSG00000038156  |
| Q99JH7 | Clstn3  | 146661 | Aplp2    | amyloid beta (A4) precursor-like protein 2                       | ENSMUSG00000031996  |
| Q99JH7 | Clstn3  | 211078 | Oat      | ornithine aminotransferase                                       | ENSMUSG00000030934  |
| Q99JH7 | Clstn3  | 151663 | Mat1a    | methionine adenosyltransferase I, alpha                          | ENSMUSG00000037798  |
| Q99JH7 | Clstn3  | 172954 | App      | amyloid beta (A4) precursor protein                              | ENSMUSG00000022892  |
| Q99JH7 | Clstn3  | 129626 | Pdia6    | protein disulfide isomerase associated 6                         | ENSMUSG00000020571  |
| Q99JH7 | Clstn3  | 131138 | Calu     | calumenin                                                        | ENSMUSG00000029767  |
| Q99JH7 | Clstn3  | 152814 | Ppp1r2   | protein phosphatase 1, regulatory (inhibitor) subunit 2          | ENSMUSG00000047714  |
| Q99JH7 | Clstn3  | 196143 | Epb4.113 | erythrocyte protein band 4.1-like 3                              | ENSMUSG00000024044  |
| Q99JH7 | Clstn3  | 178669 | Ppib     | peptidylprolyl isomerase B                                       | ENSMUSG00000032383  |
| Q99JH7 | Clstn3  | 174959 | Calr     | calreticulin                                                     | ENSMUSG0000003814   |
| Q99JH7 | Clstn3  | 182078 | Hsp90b1  | heat shock protein 90, beta (Grp94), member 1                    | ENSMUSG00000020048  |
| Q99JH7 | Clstn3  | 168591 | Canx     | calnexin                                                         | ENSMUSG00000020368  |
| Q99JH7 | Clstn3  | 176351 | Cntn1    | contactin 1                                                      | ENSMUSG00000055022  |
| Q99JH7 | Clstn3  | 163105 | Ncam1    | neural cell adhesion molecule 1                                  | ENSMUSG00000039542  |
| Q99JH7 | Clstn3  | 168462 | Rcn2     | reticulocalbin 2                                                 | ENSMUSG00000032320  |
| Q99JH7 | Clstn3  | 205238 | Clstn1   | calsyntenin 1                                                    | ENSMUSG00000039953  |
| Q99JH7 | Clstn3  | 182141 | Gabbr1   | gamma-aminobutyric acid (GABA) B receptor, 1                     | ENSMUSG00000024462  |
| Q99JH7 | Clstn3  | 157064 | Hyou1    | hypoxia up-regulated 1                                           | ENSMUSG00000032115  |
| Q99JH7 | Clstn3  | 171290 | Hspa4    | heat shock protein 4                                             | ENSMUSG00000020361  |
| Q99JH7 | Clstn3  | 175327 | Sraap3   | SLIT-ROBO Rho GTPase activating protein 3                        | ENSMUSG00000030257  |
| Q99JH7 | Clstn3  | 141546 | Ganab    | alpha glucosidase 2 alpha neutral subunit                        | ENSMUSG00000071650  |
| Q99JH7 | Clstn3  | 192274 | Nfasc    | neurofascin                                                      | ENSMUSG00000026442  |
| Q99JH7 | Clstn3  | 178513 | Atp2b2   | ATPase, Ca++ transporting, plasma membrane 2                     | ENSMUSG00000030302  |
| Q99JH7 | Clstn3  | 146362 | Erp44    | endoplasmic reticulum protein 44                                 | ENSMUSG00000028343  |
| Q99JH7 | Clstn3  | 168858 | Lingo1   | leucine rich repeat and Iq domain containing 1                   | ENSMUSG00000049556  |
| Q99JH7 | Clstn3  | 260830 | Prnp     | prion protein                                                    | ENSMUSG00000079037  |
| Q99JH7 | Clstn3  | 158252 | Cpe      | carboxypeptidase E                                               | ENSMUSG00000037852  |
| Q68FD5 | Citc    | 207842 | Snap25   | synaptosomal-associated protein 25                               | ENSMUSG00000027273  |
| Q68FD5 | Citc    | 203389 | Stx1a    | syntaxin 1A (brain)                                              | ENSMUSG00000007207  |
| Q68FD5 | Citc    | 175573 | Gria1    | glutamate receptor, ionotropic, AMPA1 (alpha 1)                  | ENSMUSG00000020524  |
| Q68FD5 | Citc    | 193317 | Dlq4     | discs, large homolog 4 (Drosophila)                              | ENSMUSG00000020886  |
| Q68FD5 | Citc    | 150657 | Camk2a   | calcium/calmodulin-dependent protein kinase II alpha             | ENSMUSG00000024617  |
| Q68FD5 | Citc    | 210393 | Stx1b    | syntaxin 1B                                                      | ENSMUSG00000030806  |
| Q68FD5 | Citc    | 245666 | ACAP1    | ArfGAP with coiled-coil, ankyrin repeat and PH domains 1         | ENSG00000072818     |
| Q68FD5 | Citc    | 30077  | SNCA     | synuclein, alpha (non A4 component of amyloid precursor protein) | ENSG00000145335     |
| Q68FD5 | Citc    | 159551 | Dnm1     | dynamain 1                                                       | ENSMUSG00000026825  |
| Q68FD5 | Citc    | 137748 | Kcnma1   | potassium large conductance calcium-activated channel, slow      | ENSMUSG000000063142 |
| Q68FD5 | Citc    | 158171 | Spnb2    | spectrin beta 2                                                  | ENSMUSG00000020315  |
| Q68FD5 | Citc    | 200597 | Ywhae    | tyrosine 3-monooxygenase/tryptophan 5-monooxygenase              | ENSMUSG00000020849  |
| Q68FD5 | Citc    | 195117 | Pfn1     | profilin 1                                                       | ENSMUSG00000018293  |
| Q68FD5 | Citc    | 174739 | Sv2a     | synaptic vesicle glycoprotein 2 a                                | ENSMUSG00000038486  |
| Q68FD5 | Citc    | 205183 | Ap2b1    | adaptor-related protein complex 2, beta 1 subunit                | ENSMUSG00000035152  |
| Q68FD5 | Citc    | 180315 | Ap2a1    | adaptor protein complex AP-2, alpha 1 subunit                    | ENSMUSG00000060279  |
| Q68FD5 | Citc    | 143791 | Ap1b1    | adaptor protein complex AP-1, beta 1 subunit                     | ENSMUSG00000009090  |
| Q68FD5 | Citc    | 135538 | Syn1     | synapsin I                                                       | ENSMUSG00000037217  |
| Q68FD5 | Citc    | 189699 | Snap91   | synaptosomal-associated protein 91                               | ENSMUSG00000033419  |
| Q68FD5 | Citc    | 213066 | Nsf      | N-ethylmaleimide sensitive fusion protein                        | ENSMUSG00000034187  |
| Q68FD5 | Citc    | 27257  | LRRK2    | leucine-rich repeat kinase 2                                     | ENSG00000188906     |
| Q68FD5 | Citc    | 159493 | Acta2    | actin, alpha 2, smooth muscle, aorta                             | ENSMUSG00000035783  |
| Q68FD5 | Citc    | 132306 | Cadps    | Ca2+-dependent secretion activator                               | ENSMUSG00000054423  |
| Q68FD5 | Citc    | 161623 | Stxbp1   | syntaxin binding protein 1                                       | ENSMUSG00000026797  |
| Q68FD5 | Citc    | 179144 | Tubb5    | tubulin, beta 5                                                  | ENSMUSG00000001525  |
| Q68FD5 | Citc    | 195526 | Lin7c    | lin-7 homolog C (C. elegans)                                     | ENSMUSG00000027162  |
| Q68FD5 | Citc    | 191187 | Apba2    | amyloid beta (A4) precursor protein-binding, family A, member 2  | ENSMUSG00000030519  |
| Q68FD5 | Citc    | 182740 | Lin7b    | lin-7 homolog B (C. elegans)                                     | ENSMUSG00000003872  |
| Q68FD5 | Citc    | 140932 | Dst      | dystonin                                                         | ENSMUSG00000026131  |
| Q68FD5 | Citc    | 188759 | Ppfia2   | protein tyrosine phosphatase, receptor type, f polypeptide       | ENSMUSG00000053825  |
| Q68FD5 | Citc    | 182583 | Ppfia3   | protein tyrosine phosphatase, receptor type, f polypeptide       | ENSMUSG00000003863  |
| Q68FD5 | Citc    | 182053 | Tuba1c   | tubulin, alpha 1C                                                | ENSMUSG000000043091 |
| Q68FD5 | Citc    | 133241 | Cask     | calcium/calmodulin-dependent serine protein kinase (MAC          | ENSMUSG00000031012  |
| Q68FD5 | Citc    | 214779 | Actg1    | actin, gamma, cytoplasmic 1                                      | ENSMUSG00000062825  |
| Q68FD5 | Citc    | 144904 | Grin1    | glutamate receptor, ionotropic, NMDA1 (zeta 1)                   | ENSMUSG00000026959  |
| Q62Q08 | Cnot1   | 201159 | Itgb1    | integrin beta 1 (fibronectin receptor beta)                      | ENSMUSG00000025809  |
| Q62Q08 | Cnot1   | 181254 | Cnot6l   | CCR4-NOT transcription complex, subunit 6-like                   | ENSMUSG00000034724  |
| Q61330 | Cntn2   | 203902 | Tgfb2    | transforming growth factor, beta receptor II                     | ENSMUSG00000032440  |
| Q61330 | Cntn2   | 201307 | Ubc      | ubiquitin C                                                      | ENSMUSG00000008348  |
| Q9JMB8 | Cntn6   | 173444 | Chl1     | cell adhesion molecule with homology to L1CAM                    | ENSMUSG00000030077  |
| Q99P47 | Cntnap4 | 133241 | Cask     | calcium/calmodulin-dependent serine protein kinase (MAC          | ENSMUSG00000031012  |
| Q8CIE6 | Copa    | 38990  | COPE     | coatamer protein complex, subunit epsilon                        | ENSG00000105669     |
| Q8CIE6 | Copa    | 104029 | COPA     | coatamer protein complex, subunit alpha                          | ENSG00000122218     |
| Q8CIE6 | Copa    | 37816  | COPZ1    | coatamer protein complex, subunit zeta 1                         | ENSG00000111481     |
| Q8CIE6 | Copa    | 58841  | COPB2    | coatamer protein complex, subunit beta 2 (beta prime)            | ENSG00000184432     |
| Q8CIE6 | Copa    | 89834  | BCAP31   | B-cell receptor-associated protein 31                            | ENSG00000185825     |



|        |         |        |          |                                                             |                    |
|--------|---------|--------|----------|-------------------------------------------------------------|--------------------|
| Q8CIE6 | Copa    | 33088  | COPB1    | coatamer protein complex, subunit beta 1                    | ENSG00000129083    |
| Q8CIE6 | Copa    | 48249  | SIPA1L3  | signal-induced proliferation-associated 1 like 3            | ENSG00000105738    |
| Q8CIE6 | Copa    | 25127  | ERGIC2   | ERGIC and golgi 2                                           | ENSG00000087502    |
| Q8CIE6 | Copa    | 55630  | COPG     | coatamer protein complex, subunit gamma                     | ENSG00000181789    |
| Q8CIE6 | Copa    | 46170  | ATL2     | atlastin GTPase 2                                           | ENSG00000119787    |
| Q8CIE6 | Copa    | 73982  | ARCN1    | archain 1                                                   | ENSG00000095139    |
| Q9JIF7 | Copb1   | 158983 | Mapk14   | mitogen-activated protein kinase 14                         | ENSMUSG00000053436 |
| Q9JIF7 | Copb1   | 131410 | Elavl1   | ELAV (embryonic lethal, abnormal vision, Drosophila)-like   | ENSMUSG00000040028 |
| Q9JIF7 | Copb1   | 176189 | Ins1     | insulin I                                                   | ENSMUSG00000035804 |
| O88544 | Cops4   | 197036 | Stat2    | signal transducer and activator of transcription 2          | ENSMUSG00000040033 |
| O88544 | Cops4   | 46918  | CUL1     | cullin 1                                                    | ENSG00000055130    |
| O35864 | Cops5   | 46918  | CUL1     | cullin 1                                                    | ENSG00000055130    |
| O35864 | Cops5   | 214902 | Gps1     | G protein pathway suppressor 1                              | ENSMUSG00000025156 |
| O35864 | Cops5   | 179989 | Cops8    | COP9 (constitutive photomorphogenic) homolog, subunit       | ENSMUSG00000034432 |
| O35864 | Cops5   | 179523 | Cops3    | COP9 (constitutive photomorphogenic) homolog, subunit       | ENSMUSG00000019373 |
| O35864 | Cops5   | 177144 | Cops7b   | COP9 (constitutive photomorphogenic) homolog, subunit       | ENSMUSG00000026240 |
| O35864 | Cops5   | 205825 | Cops6    | COP9 (constitutive photomorphogenic) homolog, subunit       | ENSMUSG00000019494 |
| O35864 | Cops5   | 139755 | Vcp      | valosin containing protein                                  | ENSMUSG00000028452 |
| Q00493 | Cpe     | 209151 | Cst3     | cystatin C                                                  | ENSMUSG00000027447 |
| Q00493 | Cpe     | 185288 | Sparcl1  | SPARC-like 1                                                | ENSMUSG00000029309 |
| Q00493 | Cpe     | 168935 | Aplp1    | amyloid beta (A4) precursor-like protein 1                  | ENSMUSG00000006651 |
| Q00493 | Cpe     | 163151 | Hspa5    | heat shock protein 5                                        | ENSMUSG00000026864 |
| Q00493 | Cpe     | 155394 | Thy1     | thymus cell antigen 1, theta                                | ENSMUSG00000032011 |
| Q00493 | Cpe     | 207129 | Spon1    | spondin 1, (f-spondin) extracellular matrix protein         | ENSMUSG00000038156 |
| Q00493 | Cpe     | 146661 | Aplp2    | amyloid beta (A4) precursor-like protein 2                  | ENSMUSG00000031996 |
| Q00493 | Cpe     | 211078 | Oat      | ornithine aminotransferase                                  | ENSMUSG00000030934 |
| Q00493 | Cpe     | 151663 | Mat1a    | methionine adenosyltransferase I, alpha                     | ENSMUSG00000037798 |
| Q00493 | Cpe     | 172954 | App      | amyloid beta (A4) precursor protein                         | ENSMUSG00000022892 |
| Q00493 | Cpe     | 129626 | Pdia6    | protein disulfide isomerase associated 6                    | ENSMUSG00000020571 |
| Q00493 | Cpe     | 131138 | Calu     | calumenin                                                   | ENSMUSG00000029767 |
| Q00493 | Cpe     | 152814 | Ppp1r2   | protein phosphatase 1, regulatory (inhibitor) subunit 2     | ENSMUSG00000047714 |
| Q00493 | Cpe     | 196143 | Epb4.113 | erythrocyte protein band 4.1-like 3                         | ENSMUSG00000024044 |
| Q00493 | Cpe     | 178669 | Ppib     | peptidylprolyl isomerase B                                  | ENSMUSG00000032383 |
| Q00493 | Cpe     | 174959 | Calr     | calreticulin                                                | ENSMUSG00000038114 |
| Q00493 | Cpe     | 182078 | Hsp90b1  | heat shock protein 90, beta (Grp94), member 1               | ENSMUSG00000020048 |
| Q00493 | Cpe     | 168591 | Canx     | calnexin                                                    | ENSMUSG00000020368 |
| Q00493 | Cpe     | 176351 | Cntn1    | contactin 1                                                 | ENSMUSG00000055022 |
| Q00493 | Cpe     | 163105 | Ncam1    | neural cell adhesion molecule 1                             | ENSMUSG00000039542 |
| Q00493 | Cpe     | 168462 | Rcn2     | reticulocalbin 2                                            | ENSMUSG00000032320 |
| Q00493 | Cpe     | 205238 | Clstn1   | calsyntenin 1                                               | ENSMUSG00000039953 |
| Q00493 | Cpe     | 182141 | Gabbr1   | gamma-aminobutyric acid (GABA) B receptor, 1                | ENSMUSG00000024462 |
| Q00493 | Cpe     | 157064 | Hyou1    | hypoxia up-regulated 1                                      | ENSMUSG00000032115 |
| Q00493 | Cpe     | 171290 | Hspa4    | heat shock protein 4                                        | ENSMUSG00000020361 |
| Q00493 | Cpe     | 175327 | Sraap3   | SLIT-ROBO Rho GTPase activating protein 3                   | ENSMUSG00000030257 |
| Q00493 | Cpe     | 141546 | Ganab    | alpha glucosidase 2 alpha neutral subunit                   | ENSMUSG00000071650 |
| Q00493 | Cpe     | 192274 | Nfasc    | neurofascin                                                 | ENSMUSG00000026442 |
| Q00493 | Cpe     | 178513 | Atp2b2   | ATPase, Ca++ transporting, plasma membrane 2                | ENSMUSG00000030302 |
| Q00493 | Cpe     | 146362 | Erp44    | endoplasmic reticulum protein 44                            | ENSMUSG00000028343 |
| Q00493 | Cpe     | 168858 | Lingo1   | leucine rich repeat and Iq domain containing 1              | ENSMUSG00000049556 |
| Q00493 | Cpe     | 186875 | Clstn3   | calsyntenin 3                                               | ENSMUSG00000008153 |
| Q00493 | Cpe     | 260830 | Prnp     | prion protein                                               | ENSMUSG00000079037 |
| Q00493 | Cpe     | 18226  | PRKAA1   | protein kinase, AMP-activated, alpha 1 catalytic subunit    | ENSG00000132356    |
| Q00493 | Cpe     | 178304 | Klik1b4  | kallikrein 1-related peptidase b4                           | ENSMUSG00000066513 |
| Q00493 | Cpe     | 195506 | Bdnf     | brain derived neurotrophic factor                           | ENSMUSG00000048482 |
| P22935 | Crabp2  | 179611 | Tdq      | thymine DNA glycosylase                                     | ENSMUSG00000034674 |
| P22935 | Crabp2  | 164782 | Ep300    | E1A binding protein p300                                    | ENSMUSG00000055024 |
| Q92125 | Creb3l1 | 168138 | Daxx     | Fas death domain-associated protein                         | ENSMUSG00000020307 |
| P45481 | Crebbp  | 136654 | Ii2ra    | interleukin 2 receptor, alpha chain                         | ENSMUSG00000026770 |
| P45481 | Crebbp  | 128365 | Lyn      | Yamaguchi sarcoma viral (v-yes-1) oncogene homolog          | ENSMUSG00000042288 |
| P45481 | Crebbp  | 24827  | NCOA2    | nuclear receptor coactivator 2                              | ENSG00000140396    |
| P45481 | Crebbp  | 97997  | ESR1     | estrogen receptor 1                                         | ENSG00000091831    |
| P45481 | Crebbp  | 191571 | Khdrbs1  | KH domain containing, RNA binding, signal transduction a    | ENSMUSG00000028790 |
| P45481 | Crebbp  | 26364  | TP53     | tumor protein p53                                           | ENSG00000141510    |
| P45481 | Crebbp  | 132298 | Rela     | v-rel reticuloendotheliosis viral oncogene homolog A (avian | ENSMUSG00000024927 |
| P45481 | Crebbp  | 9448   | SREBF2   | sterol regulatory element binding transcription factor 2    | ENSG00000198911    |
| P45481 | Crebbp  | 1757   | MED15    | mediator complex subunit 15                                 | ENSG00000099917    |
| P45481 | Crebbp  | 79573  | CREB1    | cAMP responsive element binding protein 1                   | ENSG00000118260    |
| P45481 | Crebbp  | 96852  | MYB      | v-myb myeloblastosis viral oncogene homolog (avian)         | ENSG00000118513    |
| P45481 | Crebbp  | 146013 | Wwtr1    | WW domain containing transcription regulator 1              | ENSMUSG00000027803 |
| P45481 | Crebbp  | 175856 | Ifnar2   | interferon (alpha and beta) receptor 2                      | ENSMUSG00000022971 |
| P45481 | Crebbp  | 194495 | Maf      | avian musculoaponeurotic fibrosarcoma (v-maf) A542 on       | ENSMUSG00000055435 |
| P45481 | Crebbp  | 79741  | NCOA3    | nuclear receptor coactivator 3                              | ENSG00000124151    |
| P45481 | Crebbp  | 169132 | Chuk     | conserved helix-loop-helix ubiquitous kinase                | ENSMUSG00000025199 |
| P45481 | Crebbp  | 33208  | SREBF1   | sterol regulatory element binding transcription factor 1    | ENSG00000072310    |
| P45481 | Crebbp  | 164782 | Ep300    | E1A binding protein p300                                    | ENSMUSG00000055024 |
| P45481 | Crebbp  | 84312  | ISG15    | ISG15 ubiquitin-like modifier                               | ENSG00000187608    |
| P45481 | Crebbp  | 190185 | Sfpi1    | SFFV proviral integration 1                                 | ENSMUSG00000002111 |
| P45481 | Crebbp  | 181123 | Irf3     | interferon regulatory factor 3                              | ENSMUSG00000003184 |
| P45481 | Crebbp  | 159854 | Ifit1    | interferon-induced protein with tetratricopeptide repeats   | ENSMUSG00000034459 |
| P45481 | Crebbp  | 63225  | IRF3     | interferon regulatory factor 3                              | ENSG00000126456    |
| P45481 | Crebbp  | 211637 | Stat3    | signal transducer and activator of transcription 3          | ENSMUSG00000004040 |
| P45481 | Crebbp  | 195602 | Stat6    | signal transducer and activator of transcription 6          | ENSMUSG00000002147 |
| P45481 | Crebbp  | 177503 | Matk     | megakaryocyte-associated tyrosine kinase                    | ENSMUSG00000004933 |
| P45481 | Crebbp  | 132667 | Socs1    | suppressor of cytokine signaling 1                          | ENSMUSG00000038037 |
| P45481 | Crebbp  | 162198 | Ifnb1    | interferon beta 1, fibroblast                               | ENSMUSG00000048806 |
| P45481 | Crebbp  | 205635 | Gm11428  | predicted gene 11428                                        | ENSMUSG00000069792 |
| P45481 | Crebbp  | 171764 | Ldb1     | LIM domain binding 1                                        | ENSMUSG00000025223 |
| P45481 | Crebbp  | 175763 | Tal1     | T-cell acute lymphocytic leukemia 1                         | ENSMUSG00000028717 |
| P45481 | Crebbp  | 47411  | RARA     | retinoic acid receptor, alpha                               | ENSG00000131759    |

|        |           |        |         |                                                               |                    |
|--------|-----------|--------|---------|---------------------------------------------------------------|--------------------|
| P45481 | Crebbp    | 203320 | Rxrq    | retinoid X receptor gamma                                     | ENSMUSG00000015843 |
| P45481 | Crebbp    | 56918  | HOXB7   | homeobox B7                                                   | ENSG00000120087    |
| P45481 | Crebbp    | 56983  | HOXB9   | homeobox B9                                                   | ENSG00000170689    |
| P45481 | Crebbp    | 56810  | HOXB4   | homeobox B4                                                   | ENSG00000182742    |
| P45481 | Crebbp    | 181182 | Hoxd4   | homeobox D4                                                   | ENSMUSG00000042464 |
| P45481 | Crebbp    | 56721  | HOXB2   | homeobox B2                                                   | ENSG00000173917    |
| P45481 | Crebbp    | 56791  | HOXB3   | homeobox B3                                                   | ENSG00000120093    |
| P45481 | Crebbp    | 75704  | HOXD10  | homeobox D10                                                  | ENSG00000128710    |
| P45481 | Crebbp    | 75755  | HOXD4   | homeobox D4                                                   | ENSG00000170166    |
| P45481 | Crebbp    | 56845  | HOXB6   | homeobox B6                                                   | ENSG00000108511    |
| P45481 | Crebbp    | 104447 | PBX1    | pre-B-cell leukemia homeobox 1                                | ENSG00000185630    |
| P45481 | Crebbp    | 172487 | Hdac10  | histone deacetylase 10                                        | ENSMUSG00000062906 |
| P45481 | Crebbp    | 132359 | Pcmt1   | protein-L-isoaspartate (D-aspartate) O-methyltransferase      | ENSMUSG00000019795 |
| P45481 | Crebbp    | 134872 | Cited2  | Cbp/p300-interacting transactivator, with Glu/Asp-rich car    | ENSMUSG00000039910 |
| P45481 | Crebbp    | 205730 | Polr1b  | polymerase (RNA) I polypeptide B                              | ENSMUSG00000027395 |
| P45481 | Crebbp    | 179280 | Ets2    | E26 avian leukemia oncogene 2, 3' domain                      | ENSMUSG00000022895 |
| P45481 | Crebbp    | 181423 | Mil2    | myeloid/lymphoid or mixed-lineage leukemia 2                  | ENSMUSG00000048154 |
| P45481 | Crebbp    | 182067 | Gpbp1   | GC-rich promoter binding protein 1                            | ENSMUSG00000032745 |
| P45481 | Crebbp    | 147548 | Ets1    | E26 avian leukemia oncogene 1, 5' domain                      | ENSMUSG00000032035 |
| P45481 | Crebbp    | 189502 | Nfe2    | nuclear factor, erythroid derived 2                           | ENSMUSG00000058794 |
| P45481 | Crebbp    | 172461 | Mitf    | microphthalmia-associated transcription factor                | ENSMUSG00000035158 |
| P45481 | Crebbp    | 186053 | Myod1   | myogenic differentiation 1                                    | ENSMUSG00000009471 |
| P45481 | Crebbp    | 172404 | Lass2   | LAG1 homolog, ceramide synthase 2                             | ENSMUSG00000015714 |
| P45481 | Crebbp    | 181483 | Nfe2l2  | nuclear factor, erythroid derived 2, like 2                   | ENSMUSG00000015839 |
| P45481 | Crebbp    | 212832 | Ncoa3   | nuclear receptor coactivator 3                                | ENSMUSG00000027678 |
| P45481 | Crebbp    | 207513 | Prkcz   | protein kinase C, zeta                                        | ENSMUSG00000029053 |
| P45481 | Crebbp    | 195801 | Zfp592  | zinc finger protein 592                                       | ENSMUSG00000005621 |
| P45481 | Crebbp    | 7852   | HTT     | huntingtin                                                    | ENSG00000197386    |
| P45481 | Crebbp    | 190822 | Kat2b   | K(lysine) acetyltransferase 2B                                | ENSMUSG00000000708 |
| P45481 | Crebbp    | 205243 | Ctnnb1  | catenin (cadherin associated protein), beta 1                 | ENSMUSG00000006932 |
| P45481 | Crebbp    | 141988 | Phf17   | PHD finger protein 17                                         | ENSMUSG00000025764 |
| P45481 | Crebbp    | 151888 | Hes1    | hairly and enhancer of split 1 (Drosophila)                   | ENSMUSG00000022528 |
| P45481 | Crebbp    | 191036 | Trp53   | transformation related protein 53                             | ENSMUSG00000059552 |
| P45481 | Crebbp    | 135865 | Cnot3   | CCR4-NOT transcription complex, subunit 3                     | ENSMUSG00000035632 |
| P45481 | Crebbp    | 191455 | Sh3gl1  | SH3-domain GRB2-like 1                                        | ENSMUSG00000003200 |
| P45481 | Crebbp    | 202154 | Zbtb17  | zinc finger and BTB domain containing 17                      | ENSMUSG00000006215 |
| P45481 | Crebbp    | 194019 | Trip10  | thyroid hormone receptor interactor 10                        | ENSMUSG00000019487 |
| P45481 | Crebbp    | 200814 | Eif2b1  | eukaryotic translation initiation factor 2B, subunit 1 (alpha | ENSMUSG00000029388 |
| P45481 | Crebbp    | 46431  | MDM2    | Mdm2 p53 binding protein homolog (mouse)                      | ENSG00000135679    |
| P45481 | Crebbp    | 24524  | RCHY1   | ring finger and CHY zinc finger domain containing 1           | ENSG00000163743    |
| P45481 | Crebbp    | 85033  | CDKN1A  | cyclin-dependent kinase inhibitor 1A (p21, Cip1)              | ENSG00000124762    |
| P45481 | Crebbp    | 57604  | KATS    | K(lysine) acetyltransferase 5                                 | ENSG00000172977    |
| P45481 | Crebbp    | 33430  | TP53I3  | tumor protein p53 inducible protein 3                         | ENSG00000115129    |
| P45481 | Crebbp    | 74840  | FOXO4   | forkhead box O4                                               | ENSG00000184481    |
| P45481 | Crebbp    | 163340 | Foxo4   | forkhead box O4                                               | ENSMUSG00000042903 |
| P45481 | Crebbp    | 161359 | Creb1   | cAMP responsive element binding protein 1                     | ENSMUSG00000025958 |
| P45481 | Crebbp    | 256978 | Hoxd3   | homeobox D3                                                   | ENSMUSG00000079277 |
| Q91W50 | Csde1     | 189502 | Nfe2    | nuclear factor, erythroid derived 2                           | ENSMUSG00000058794 |
| Q91W50 | Csde1     | 192287 | Grip1   | glutamate receptor interacting protein 1                      | ENSMUSG00000034813 |
| Q8VHY0 | Cspg4     | 153567 | Gria2   | glutamate receptor, ionotropic, AMPA2 (alpha 2)               | ENSMUSG00000033981 |
| Q8VHY0 | Cspg4     | 157659 | Cxcr5   | chemokine (C-X-C motif) receptor 5                            | ENSMUSG00000047880 |
| Q62018 | Ctr9      | 50702  | STAT3   | signal transducer and activator of transcription 3 (acute-p   | ENSG00000168610    |
| Q62018 | Ctr9      | 148014 | Hoxa9   | homeobox A9                                                   | ENSMUSG00000038227 |
| Q62018 | Ctr9      | 73725  | MLL     | myeloid/lymphoid or mixed-lineage leukemia (trithorax ho      | ENSG00000118058    |
| Q62018 | Ctr9      | 175763 | Tal1    | T-cell acute lymphocytic leukemia 1                           | ENSMUSG00000028717 |
| Q62018 | Ctr9      | 189416 | Sfpq    | splicing factor proline/glutamine rich (polypyrimidine tract  | ENSMUSG00000028820 |
| Q62018 | Ctr9      | 166976 | Ruvb1   | RuvB-like protein 1                                           | ENSMUSG00000030079 |
| Q62018 | Ctr9      | 135334 | Pabpc1  | poly(A) binding protein, cytoplasmic 1                        | ENSMUSG00000022283 |
| Q62018 | Ctr9      | 196894 | Cdc73   | cell division cycle 73, Paf1/RNA polymerase II complex co     | ENSMUSG00000026361 |
| Q62018 | Ctr9      | 185177 | Leo1    | Leo1, Paf1/RNA polymerase II complex component, homod         | ENSMUSG00000042487 |
| Q62018 | Ctr9      | 138489 | Rcor2   | REST corepressor 2                                            | ENSMUSG00000024968 |
| Q62018 | Ctr9      | 163408 | Paf1    | Paf1, RNA polymerase II associated factor, homolog (S. ce     | ENSMUSG00000003437 |
| Q62018 | Ctr9      | 182997 | Ruvb12  | RuvB-like protein 2                                           | ENSMUSG00000003868 |
| Q62018 | Ctr9      | 167012 | Wdr61   | WD repeat domain 61                                           | ENSMUSG00000061559 |
| Q62018 | Ctr9      | 172522 | Blk     | B lymphoid kinase                                             | ENSMUSG00000014453 |
| P18242 | Ctsd      | 177150 | Enam    | enamelin                                                      | ENSMUSG00000029286 |
| P18242 | Ctsd      | 136984 | Igf2r   | insulin-like growth factor 2 receptor                         | ENSMUSG00000023830 |
| P18242 | Ctsd      | 196509 | Irf8    | interferon regulatory factor 8                                | ENSMUSG00000041515 |
| Q3TCH7 | Cul4a     | 141000 | Smarca4 | SWI/SNF related, matrix associated, actin dependent regu      | ENSMUSG00000032187 |
| Q3TCH7 | Cul4a     | 212973 | Ccnd1   | cyclin D1                                                     | ENSMUSG00000070348 |
| P70298 | Cux2      | 152459 | Gda     | guanine deaminase                                             | ENSMUSG00000058624 |
| P70298 | Cux2      | 162948 | Lgi1    | leucine-rich repeat LGI family, member 1                      | ENSMUSG00000067242 |
| P70298 | Cux2      | 179144 | Tubb5   | tubulin, beta 5                                               | ENSMUSG00000001525 |
| P70298 | Cux2      | 133249 | Adam22  | a disintegrin and metallopeptidase domain 22                  | ENSMUSG00000040537 |
| P70298 | Cux2      | 193317 | Dlg4    | discs, large homolog 4 (Drosophila)                           | ENSMUSG00000020886 |
| Q7TMB8 | Cyfp1     | 149366 | Fmr1    | fragile X mental retardation syndrome 1 homolog               | ENSMUSG00000000838 |
| Q7TMB8 | Cyfp1     | 196687 | Eif4e   | eukaryotic translation initiation factor 4E                   | ENSMUSG00000028156 |
| Q7TMB8 | Cyfp1     | 176600 | Mtap1b  | microtubule-associated protein 1B                             | ENSMUSG00000052727 |
| Q7TMB8 | Cyfp1     | 210708 | Eif6    | eukaryotic translation initiation factor 6                    | ENSMUSG00000027613 |
| Q7TMB8 | Cyfp1     | 161343 | Rps6    | ribosomal protein S6                                          | ENSMUSG00000028495 |
| Q7TMB8 | Cyfp1     | 146219 | Pfn2    | profilin 2                                                    | ENSMUSG00000027805 |
| Q7TMB8 | Cyfp1     | 88380  | FMR1    | fragile X mental retardation 1                                | ENSG00000102081    |
| Q6PGL7 | D6Wsu116e | 154306 | Casp3   | caspace 3                                                     | ENSMUSG00000031628 |
| Q6PGL7 | D6Wsu116e | 178813 | Casp7   | caspace 7                                                     | ENSMUSG00000025076 |
| O35613 | Daxx      | 160462 | Snw1    | SNW domain containing 1                                       | ENSMUSG00000021039 |
| O35613 | Daxx      | 181648 | Hipk1   | homeodomain interacting protein kinase 1                      | ENSMUSG00000008730 |
| O35613 | Daxx      | 159577 | Fas     | Fas (TNF receptor superfamily member 6)                       | ENSMUSG00000024778 |
| O35613 | Daxx      | 101257 | HIPK1   | homeodomain interacting protein kinase 1                      | ENSG00000163349    |
| O35613 | Daxx      | 177264 | Dapk3   | death-associated protein kinase 3                             | ENSMUSG00000034974 |

|        |        |        |           |                                                                        |                     |
|--------|--------|--------|-----------|------------------------------------------------------------------------|---------------------|
| Q35613 | Daxx   | 194397 | Hipk3     | homeodomain interacting protein kinase 3                               | ENSMUSG00000027177  |
| Q35613 | Daxx   | 18095  | DAPK3     | death-associated protein kinase 3                                      | ENSG00000167657     |
| Q35613 | Daxx   | 191036 | Trp53     | transformation related protein 53                                      | ENSMUSG00000059552  |
| Q35613 | Daxx   | 191852 | Mdm2      | transformed mouse 3T3 cell double minute 2                             | ENSMUSG00000020184  |
| Q35613 | Daxx   | 197637 | Rassf1    | Ras association (RalGDS/AF-6) domain family member 1                   | ENSMUSG000000010067 |
| Q35613 | Daxx   | 148417 | Mapk8     | mitogen-activated protein kinase 8                                     | ENSMUSG00000021936  |
| Q35613 | Daxx   | 192874 | Slc2a4    | solute carrier family 2 (facilitated glucose transporter), member 4    | ENSMUSG00000018566  |
| Q35613 | Daxx   | 127944 | Kif5b     | kinesin family member 5B                                               | ENSMUSG00000006740  |
| Q35613 | Daxx   | 67436  | KIF5B     | kinesin family member 5B                                               | ENSG00000170759     |
| Q35613 | Daxx   | 166501 | Atrx      | alpha thalassemia/mental retardation syndrome X-linked                 | ENSMUSG00000031229  |
| Q35613 | Daxx   | 207281 | H3f3a     | H3 histone, family 3A                                                  | ENSMUSG00000060743  |
| Q35613 | Daxx   | 142685 | Hira      | histone cell cycle regulation defective homolog A (S. cerevisiae)      | ENSMUSG00000022702  |
| Q35613 | Daxx   | 158495 | Sumo1     | SMT3 suppressor of mif two 3 homolog 1 (yeast)                         | ENSMUSG00000026021  |
| Q35613 | Daxx   | 179881 | Dmap1     | DNA methyltransferase 1-associated protein 1                           | ENSMUSG00000009640  |
| Q35613 | Daxx   | 136255 | Map3k5    | mitogen-activated protein kinase kinase kinase 5                       | ENSMUSG000000017369 |
| Q35613 | Daxx   | 214321 | Sumo2     | SMT3 suppressor of mif two 3 homolog 2 (yeast)                         | ENSMUSG00000002738  |
| Q35613 | Daxx   | 191935 | Creb3l1   | cAMP responsive element binding protein 3-like 1                       | ENSMUSG00000027230  |
| Q35613 | Daxx   | 23359  | TGFBR2    | transforming growth factor, beta receptor II (70/80kDa)                | ENSG00000163513     |
| Q6PGN3 | Dclt2  | 200597 | Ywhae     | tyrosine 3-monooxygenase/tryptophan 5-monooxygenase                    | ENSMUSG00000020849  |
| Q91VR5 | Ddx1   | 191912 | Ticam1    | toll-like receptor adaptor molecule 1                                  | ENSMUSG000000047123 |
| Q91VR5 | Ddx1   | 157719 | Ddx21     | DEAD (Asp-Glu-Ala-Asp) box polypeptide 21                              | ENSMUSG00000020075  |
| Q91VR5 | Ddx1   | 147779 | Dhx36     | DEAH (Asp-Glu-Ala-His) box polypeptide 36                              | ENSMUSG00000027770  |
| Q9CWX9 | Ddx47  | 185563 | Aicda     | activation-induced cytidine deaminase                                  | ENSMUSG000000040627 |
| Q9CWX9 | Ddx47  | 148105 | Wdfy4     | WD repeat and FYVE domain containing 4                                 | ENSMUSG00000051506  |
| Q9CWX9 | Ddx47  | 198150 | Fam129a   | family with sequence similarity 129, member A                          | ENSMUSG00000026483  |
| Q9CWX9 | Ddx47  | 149105 | Sympk     | symplekin                                                              | ENSMUSG00000023118  |
| Q9CWX9 | Ddx47  | 171593 | Dync1h1   | dynein cytoplasmic 1 heavy chain 1                                     | ENSMUSG00000018707  |
| Q9CWX9 | Ddx47  | 129626 | Pdia6     | protein disulfide isomerase associated 6                               | ENSMUSG00000020571  |
| Q9CWX9 | Ddx47  | 134704 | Mre11a    | meiotic recombination 11 homolog A (S. cerevisiae)                     | ENSMUSG00000031928  |
| Q9CWX9 | Ddx47  | 178754 | Toe1      | target of EGR1, member 1 (nuclear)                                     | ENSMUSG00000028688  |
| Q9CWX9 | Ddx47  | 214390 | Galk1     | galactokinase 1                                                        | ENSMUSG00000020766  |
| Q9CWX9 | Ddx47  | 176026 | Rpl4      | ribosomal protein L4                                                   | ENSMUSG00000032399  |
| Q9CWX9 | Ddx47  | 142542 | Serpinb1a | serine (or cysteine) peptidase inhibitor, clade B, member B1           | ENSMUSG00000044734  |
| Q921T5 | Deaf1  | 53956  | GSK3A     | glycogen synthase kinase 3 alpha                                       | ENSG00000105723     |
| Q921T5 | Deaf1  | 51663  | GSK3B     | glycogen synthase kinase 3 beta                                        | ENSG00000082701     |
| Q99LB2 | Dhrs4  | 155224 | Set       | SET nuclear oncogene                                                   | ENSMUSG00000054766  |
| Q811D0 | Dlg1   | 190092 | Lrfrn2    | leucine rich repeat and fibronectin type III domain containing 2       | ENSMUSG000000040490 |
| Q811D0 | Dlg1   | 163599 | Lrfrn1    | leucine rich repeat and fibronectin type III domain containing 1       | ENSMUSG00000030600  |
| Q811D0 | Dlg1   | 132454 | Fzd1      | frizzled homolog 1 (Drosophila)                                        | ENSMUSG000000044674 |
| Q811D0 | Dlg1   | 198316 | Fzd4      | frizzled homolog 4 (Drosophila)                                        | ENSMUSG000000049791 |
| Q811D0 | Dlg1   | 158403 | Fzd7      | frizzled homolog 7 (Drosophila)                                        | ENSMUSG000000041075 |
| Q811D0 | Dlg1   | 137217 | Nrcam     | neuron-glia-CAM-related cell adhesion molecule                         | ENSMUSG00000020598  |
| Q811D0 | Dlg1   | 193317 | Dlg4      | discs, large homolog 4 (Drosophila)                                    | ENSMUSG00000020886  |
| Q811D0 | Dlg1   | 198905 | Dlg2      | discs, large homolog 2 (Drosophila)                                    | ENSMUSG00000052572  |
| Q811D0 | Dlg1   | 131990 | Grin2a    | glutamate receptor, ionotropic, NMDA2A (epsilon 1)                     | ENSMUSG000000059003 |
| Q811D0 | Dlg1   | 162702 | Dlg3      | discs, large homolog 3 (Drosophila)                                    | ENSMUSG00000000881  |
| Q811D0 | Dlg1   | 144904 | Grin1     | glutamate receptor, ionotropic, NMDA1 (zeta 1)                         | ENSMUSG00000026959  |
| Q811D0 | Dlg1   | 194672 | Grin2b    | glutamate receptor, ionotropic, NMDA2B (epsilon 2)                     | ENSMUSG00000030209  |
| Q811D0 | Dlg1   | 201307 | Ubc       | ubiquitin C                                                            | ENSMUSG00000008348  |
| Q811D0 | Dlg1   | 172617 | Mapk12    | mitogen-activated protein kinase 12                                    | ENSMUSG00000022610  |
| Q811D0 | Dlg1   | 195526 | Lin7c     | lin-7 homolog C (C. elegans)                                           | ENSMUSG00000027162  |
| Q811D0 | Dlg1   | 133241 | Cask      | calcium/calmodulin-dependent serine protein kinase (MAP kinase-kinase) | ENSMUSG00000031012  |
| Q61880 | Dmc1   | 179756 | Sp3       | trans-acting transcription factor 3                                    | ENSMUSG00000027109  |
| Q61880 | Dmc1   | 189469 | Cbx5      | chromobox homolog 5 (Drosophila HP1a)                                  | ENSMUSG00000009575  |
| Q61880 | Dmc1   | 172468 | Setdb1    | SET domain, bifurcated 1                                               | ENSMUSG000000015697 |
| Q61880 | Dmc1   | 211789 | L3mbtl1   | l(3)mbt-like (Drosophila)                                              | ENSMUSG00000035576  |
| Q61880 | Dmc1   | 164939 | L3mbtl2   | l(3)mbt-like 2 (Drosophila)                                            | ENSMUSG00000022394  |
| Q61712 | Dnajc1 | 163151 | Hspa5     | heat shock protein 5                                                   | ENSMUSG00000026864  |
| Q8BUR4 | Dock1  | 142054 | Zhx2      | zinc fingers and homeoboxes 2                                          | ENSMUSG00000017157  |
| Q8BUR4 | Dock1  | 187241 | Elmo3     | engulfment and cell motility 3, ced-12 homolog (C. elegans)            | ENSMUSG000000014791 |
| Q8BUR4 | Dock1  | 212599 | Elmo2     | engulfment and cell motility 2, ced-12 homolog (C. elegans)            | ENSMUSG00000017670  |
| Q8BUR4 | Dock1  | 144868 | Vps37c    | vacuolar protein sorting 37C (yeast)                                   | ENSMUSG000000048832 |
| Q8BUR4 | Dock1  | 132929 | Elmo1     | engulfment and cell motility 1, ced-12 homolog (C. elegans)            | ENSMUSG00000041112  |
| P97465 | Dok1   | 158216 | Abl1      | c-abl oncogene 1, non-receptor tyrosine kinase                         | ENSMUSG00000026842  |
| P97465 | Dok1   | 193200 | Nck1      | non-catalytic region of tyrosine kinase adaptor protein 1              | ENSMUSG00000032475  |
| P97465 | Dok1   | 36071  | ITGB7     | integrin, beta 7                                                       | ENSG00000139626     |
| P97465 | Dok1   | 53924  | ITGB5     | integrin, beta 5                                                       | ENSG00000082781     |
| P97465 | Dok1   | 547297 | ITGB3     | integrin, beta 3 (platelet glycoprotein IIIa, antigen CD61)            | ENSG00000259207     |
| P97465 | Dok1   | 5590   | ITGB2     | integrin, beta 2 (complement component 3 receptor 3 and CD113)         | ENSG00000160255     |
| P97465 | Dok1   | 80957  | PTPN1     | protein tyrosine phosphatase, non-receptor type 1                      | ENSG00000196396     |
| P97465 | Dok1   | 178553 | Inpp5d    | inositol polyphosphate-5-phosphatase D                                 | ENSMUSG00000026288  |
| P97465 | Dok1   | 149650 | Nck2      | non-catalytic region of tyrosine kinase adaptor protein 2              | ENSMUSG00000066877  |
| P97465 | Dok1   | 170167 | Tec       | tec protein tyrosine kinase                                            | ENSMUSG00000029217  |
| P97465 | Dok1   | 170552 | Csk       | c-src tyrosine kinase                                                  | ENSMUSG00000032312  |
| P97465 | Dok1   | 177951 | Phgdh     | 3-phosphoglycerate dehydrogenase                                       | ENSMUSG00000053398  |
| P97465 | Dok1   | 89599  | ABL1      | c-abl oncogene 1, non-receptor tyrosine kinase                         | ENSG00000097007     |
| P97465 | Dok1   | 170464 | Rasa1     | RAS p21 protein activator 1                                            | ENSMUSG00000021549  |
| P97465 | Dok1   | 2349   | BCR       | breakpoint cluster region                                              | ENSG00000186716     |
| P97465 | Dok1   | 214339 | Grb2      | growth factor receptor bound protein 2                                 | ENSMUSG00000059923  |
| P97465 | Dok1   | 179481 | Dok2      | docking protein 2                                                      | ENSMUSG000000022102 |
| P97465 | Dok1   | 181393 | Ret       | ret proto-oncogene                                                     | ENSMUSG00000030110  |
| P97465 | Dok1   | 206000 | Sirpa     | signal-regulatory protein alpha                                        | ENSMUSG00000037902  |
| Q05AA6 | Drp2   | 161168 | Prx       | periaxin                                                               | ENSMUSG00000053198  |
| Q05AA6 | Drp2   | 199494 | Dag1      | dystroglycan 1                                                         | ENSMUSG00000039952  |
| P55849 | Dsc1   | 49784  | JUP       | junction plakoglobin                                                   | ENSG00000173801     |
| P55849 | Dsc1   | 195134 | Pkp1      | plakophilin 1                                                          | ENSMUSG00000026413  |
| P55849 | Dsc1   | 211364 | Jup       | junction plakoglobin                                                   | ENSMUSG00000001552  |
| Q3TLR7 | Dti    | 84499  | CUL4B     | cullin 4B                                                              | ENSG00000158290     |
| Q3TLR7 | Dti    | 11343  | COP52     | COP9 constitutive photomorphogenic homolog subunit 2                   | ENSG00000166200     |

|        |          |        |          |                                                               |                     |
|--------|----------|--------|----------|---------------------------------------------------------------|---------------------|
| Q3TLR7 | Dtl      | 106535 | DTL      | denticleless homolog (Drosophila)                             | ENSG00000143476     |
| Q3TLR7 | Dtl      | 27575  | COPS4    | COP9 constitutive photomorphogenic homolog subunit 4          | ENSG00000138663     |
| Q3TLR7 | Dtl      | 49964  | DDB1     | damage-specific DNA binding protein 1, 127kDa                 | ENSG00000167986     |
| Q3TLR7 | Dtl      | 52956  | CUL4A    | cullin 4A                                                     | ENSG00000139842     |
| Q3TLR7 | Dtl      | 30497  | COPS6    | COP9 constitutive photomorphogenic homolog subunit 6          | ENSG00000168090     |
| O88487 | Dync1i2  | 74949  | DYNC1I2  | dynein, cytoplasmic 1, intermediate chain 2                   | ENSG00000077380     |
| O88487 | Dync1i2  | 20700  | DYNC1H1  | dynein, cytoplasmic 1, heavy chain 1                          | ENSG00000197102     |
| O88487 | Dync1i2  | 35488  | DYNC1I2  | dynein, cytoplasmic 1, light intermediate chain 2             | ENSG00000135720     |
| O88487 | Dync1i2  | 23769  | DYNC1LI1 | dynein, cytoplasmic 1, light intermediate chain 1             | ENSG00000144635     |
| O88487 | Dync1i2  | 60661  | DYNLL1   | dynein, light chain, LC8-type 1                               | ENSG00000088986     |
| O88487 | Dync1i2  | 55905  | DYNLT3   | dynein, light chain, Tctex-type 3                             | ENSG00000165169     |
| O88487 | Dync1i2  | 68466  | DYNLRB1  | dynein, light chain, roadblock-type 1                         | ENSG00000125971     |
| Q922Y0 | Dyrk3    | 189544 | Nfatc3   | nuclear factor of activated T-cells, cytoplasmic, calcineurin | ENSMUSG00000031902  |
| Q922Y0 | Dyrk3    | 175763 | Tal1     | T-cell acute lymphocytic leukemia 1                           | ENSMUSG00000028717  |
| Q922Y0 | Dyrk3    | 75847  | SIRT1    | sirtuin 1                                                     | ENSG00000096717     |
| Q922Y0 | Dyrk3    | 159441 | Sirt1    | sirtuin 1 (silent mating type information regulation 2, hom   | ENSMUSG00000020063  |
| Q922Y0 | Dyrk3    | 179036 | Dyrk1a   | dual-specificity tyrosine-(Y)-phosphorylation regulated kin   | ENSMUSG00000022897  |
| Q9D903 | Ebna1bp2 | 147779 | Dhx36    | DEAH (Asp-Glu-Ala-His) box polypeptide 36                     | ENSMUSG00000027770  |
| Q9D903 | Ebna1bp2 | 193395 | Csda     | cold shock domain protein A                                   | ENSMUSG00000030189  |
| Q9D903 | Ebna1bp2 | 183109 | Mov10    | Moloney leukemia virus 10                                     | ENSMUSG00000002227  |
| Q9D903 | Ebna1bp2 | 195575 | Lin28a   | lin-28 homolog A (C. elegans)                                 | ENSMUSG00000050966  |
| Q9D903 | Ebna1bp2 | 177350 | Ssb      | Sjogren syndrome antigen B                                    | ENSMUSG00000068882  |
| Q9D903 | Ebna1bp2 | 148994 | Lin28b   | lin-28 homolog B (C. elegans)                                 | ENSMUSG00000063804  |
| Q9D903 | Ebna1bp2 | 209747 | Igf2bp1  | insulin-like growth factor 2 mRNA binding protein 1           | ENSMUSG00000013415  |
| Q9D903 | Ebna1bp2 | 172864 | Zcchc11  | zinc finger, CCHC domain containing 11                        | ENSMUSG00000034610  |
| Q9D903 | Ebna1bp2 | 157719 | Ddx21    | DEAD (Asp-Glu-Ala-Asp) box polypeptide 21                     | ENSMUSG00000020075  |
| Q9D903 | Ebna1bp2 | 135334 | Pabpc1   | poly(A) binding protein, cytoplasmic 1                        | ENSMUSG00000022283  |
| Q9D903 | Ebna1bp2 | 182925 | Ybx1     | Y box protein 1                                               | ENSMUSG00000028639  |
| Q9D903 | Ebna1bp2 | 185079 | Pabpc4   | poly(A) binding protein, cytoplasmic 4                        | ENSMUSG00000011257  |
| Q9CS74 | Ecd      | 164253 | Itgb1bp2 | integrin beta 1 binding protein 2                             | ENSMUSG00000031312  |
| Q8JZ09 | Eif3b    | 181609 | Eif3a    | eukaryotic translation initiation factor 3, subunit A         | ENSMUSG00000024991  |
| Q8JZ09 | Eif3b    | 165187 | Eif3k    | eukaryotic translation initiation factor 3, subunit K         | ENSMUSG00000053565  |
| Q8JZ09 | Eif3b    | 191270 | Eif3l    | eukaryotic translation initiation factor 3, subunit I         | ENSMUSG00000028798  |
| Q8JZ09 | Eif3b    | 139901 | Eif3h    | eukaryotic translation initiation factor 3, subunit H         | ENSMUSG00000022312  |
| Q8JZ09 | Eif3b    | 138056 | Eif3g    | eukaryotic translation initiation factor 3, subunit G         | ENSMUSG000000070319 |
| Q8JZ09 | Eif3b    | 206007 | Eif3f    | eukaryotic translation initiation factor 3, subunit F         | ENSMUSG00000031029  |
| Q8JZ09 | Eif3b    | 137965 | Eif3e    | eukaryotic translation initiation factor 3, subunit E         | ENSMUSG00000022336  |
| Q8JZ09 | Eif3b    | 158541 | Eif3d    | eukaryotic translation initiation factor 3, subunit D         | ENSMUSG00000016554  |
| Q8JZ09 | Eif3b    | 209573 | Eif3c    | eukaryotic translation initiation factor 3, subunit C         | ENSMUSG00000030738  |
| Q8JZ09 | Eif3b    | 145753 | Eif4g1   | eukaryotic translation initiation factor 4, gamma 1           | ENSMUSG000000045983 |
| Q8JZ09 | Eif3b    | 191517 | Eif4a1   | eukaryotic translation initiation factor 4A1                  | ENSMUSG00000059796  |
| Q8JZ09 | Eif3b    | 196687 | Eif4e    | eukaryotic translation initiation factor 4E                   | ENSMUSG00000028156  |
| Q8JZ09 | Eif3b    | 67809  | EIF4G1   | eukaryotic translation initiation factor 4 gamma, 1           | ENSG00000114867     |
| Q8JZ09 | Eif3b    | 161343 | Rps6     | ribosomal protein S6                                          | ENSMUSG00000028495  |
| P60843 | Eif4a1   | 167913 | Pdcd4    | programmed cell death 4                                       | ENSMUSG000000024975 |
| P60843 | Eif4a1   | 145753 | Eif4g1   | eukaryotic translation initiation factor 4, gamma 1           | ENSMUSG000000045983 |
| P60843 | Eif4a1   | 206890 | Eif3b    | eukaryotic translation initiation factor 3, subunit B         | ENSMUSG000000056076 |
| P60843 | Eif4a1   | 19493  | PAIP1    | poly(A) binding protein interacting protein 1                 | ENSG00000172239     |
| P60843 | Eif4a1   | 67809  | EIF4G1   | eukaryotic translation initiation factor 4 gamma, 1           | ENSG00000114867     |
| P10630 | Eif4a2   | 17852  | DDX24    | DEAD (Asp-Glu-Ala-Asp) box polypeptide 24                     | ENSG00000089737     |
| O08856 | Ell      | 153162 | Stat1    | signal transducer and activator of transcription 1            | ENSMUSG00000026104  |
| O08856 | Ell      | 211954 | Ezh1     | enhancer of zeste homolog 1 (Drosophila)                      | ENSMUSG00000006920  |
| O08856 | Ell      | 187572 | Mtf2     | metal response element binding transcription factor 2         | ENSMUSG00000029267  |
| O08856 | Ell      | 190814 | Rbbp4    | retinoblastoma binding protein 4                              | ENSMUSG00000057236  |
| O08856 | Ell      | 203783 | Suz12    | suppressor of zeste 12 homolog (Drosophila)                   | ENSMUSG000000017548 |
| O08856 | Ell      | 196120 | Aebp2    | AE binding protein 2                                          | ENSMUSG00000030232  |
| O08856 | Ell      | 178190 | Morc3    | microrchidia 3                                                | ENSMUSG000000039456 |
| O08856 | Ell      | 159635 | Stk38    | serine/threonine kinase 38                                    | ENSMUSG000000024006 |
| O08856 | Ell      | 165162 | BC018507 | cDNA sequence BC018507                                        | ENSMUSG00000034525  |
| O08856 | Ell      | 198429 | Stk38l   | serine/threonine kinase 38 like                               | ENSMUSG000000001630 |
| O08856 | Ell      | 136486 | Bclaf1   | BCL2-associated transcription factor 1                        | ENSMUSG000000037608 |
| O08856 | Ell      | 188132 | Thrap3   | thyroid hormone receptor associated protein 3                 | ENSMUSG000000043962 |
| O08856 | Ell      | 175374 | Trim35   | tripartite motif-containing 35                                | ENSMUSG000000022043 |
| O08856 | Ell      | 198609 | Eed      | embryonic ectoderm development                                | ENSMUSG000000030619 |
| O08856 | Ell      | 153367 | Setx     | senataxin                                                     | ENSMUSG000000043535 |
| O08856 | Ell      | 147776 | Jarid2   | jumonij, AT rich interactive domain 2                         | ENSMUSG000000038518 |
| O08856 | Ell      | 143636 | Ezh2     | enhancer of zeste homolog 2 (Drosophila)                      | ENSMUSG00000029687  |
| O08856 | Ell      | 197855 | Ivns1abp | influenza virus NS1A binding protein                          | ENSMUSG000000023150 |
| Q61549 | Emr1     | 190185 | Sfp1     | SFFV proviral integration 1                                   | ENSMUSG00000002111  |
| Q61549 | Emr1     | 26868  | ELF1     | E74-like factor 1 (ets domain transcription factor)           | ENSG00000120690     |
| Q61549 | Emr1     | 85951  | ELF4     | E74-like factor 4 (ets domain transcription factor)           | ENSG00000102034     |
| P21550 | Eno3     | 192076 | Mef2a    | myocyte enhancer factor 2A                                    | ENSMUSG00000030557  |
| Q8C014 | Epc2     | 186954 | Ldha     | lactate dehydrogenase A                                       | ENSMUSG000000063229 |
| Q8C014 | Epc2     | 158996 | Hdgp     | hepatoma-derived growth factor                                | ENSMUSG00000004897  |
| Q8C014 | Epc2     | 208186 | Trrap    | transformation/transcription domain-associated protein        | ENSMUSG000000045482 |
| Q8C014 | Epc2     | 190143 | Ep400    | E1A binding protein p400                                      | ENSMUSG00000029505  |
| Q8C014 | Epc2     | 132192 | Kat5     | K(lysine) acetyltransferase 5                                 | ENSMUSG00000024926  |
| Q8C014 | Epc2     | 179881 | Dmap1    | DNA methyltransferase 1-associated protein 1                  | ENSMUSG00000009640  |
| Q8C014 | Epc2     | 182674 | Ciapi1   | cytokine induced apoptosis inhibitor 1                        | ENSMUSG000000031781 |
| Q8C014 | Epc2     | 135252 | Brd8     | bromodomain containing 8                                      | ENSMUSG000000003778 |
| Q8C014 | Epc2     | 190649 | Morf4l1  | mortality factor 4 like 1                                     | ENSMUSG000000062270 |
| Q8C014 | Epc2     | 161272 | Actg2    | actin, gamma 2, smooth muscle, enteric                        | ENSMUSG000000059430 |
| Q8C014 | Epc2     | 207470 | Actb     | actin, beta                                                   | ENSMUSG000000029580 |
| Q8C014 | Epc2     | 136942 | Actl6a   | actin-like 6A                                                 | ENSMUSG000000027671 |
| Q8C014 | Epc2     | 214779 | Actg1    | actin, gamma, cytoplasmic 1                                   | ENSMUSG000000062825 |
| Q8C014 | Epc2     | 129480 | Inq3     | inhibitor of growth family, member 3                          | ENSMUSG00000029670  |
| Q8C014 | Epc2     | 102316 | VPS72    | vacuolar protein sorting 72 homolog (S. cerevisiae)           | ENSG00000163159     |
| Q8C014 | Epc2     | 127970 | Epc1     | enhancer of polycomb homolog 1 (Drosophila)                   | ENSMUSG00000024240  |
| Q8C014 | Epc2     | 151490 | Max      | Max protein                                                   | ENSMUSG000000059436 |

|        |         |        |          |                                                            |                     |
|--------|---------|--------|----------|------------------------------------------------------------|---------------------|
| Q8C014 | Epc2    | 144556 | Myc      | myelocytomatosis oncogene                                  | ENSMUSG00000022346  |
| Q60750 | Epha1   | 10872  | CHN2     | chimerin (chimaerin) 2                                     | ENSG00000106069     |
| Q60750 | Epha1   | 14206  | EFNA2    | ephrin-A2                                                  | ENSG00000099617     |
| Q60750 | Epha1   | 163843 | Efna4    | ephrin A4                                                  | ENSMUSG00000028040  |
| Q60750 | Epha1   | 148681 | Chn2     | chimerin (chimaerin) 2                                     | ENSMUSG00000004633  |
| Q60750 | Epha1   | 64876  | SMURF2   | SMAD specific E3 ubiquitin protein ligase 2                | ENSG00000108854     |
| Q99K30 | Eps8l2  | 199779 | Acta1    | actin, alpha 1, skeletal muscle                            | ENSMUSG00000031972  |
| Q9EQH2 | Erap1   | 196509 | Irf8     | interferon regulatory factor 8                             | ENSMUSG00000041515  |
| P70424 | ErbB2   | 179382 | ErbB2ip  | ErbB2 interacting protein                                  | ENSMUSG00000021709  |
| P70424 | ErbB2   | 197943 | ErbB3    | v-erb-b2 erythroblastic leukemia viral oncogene homolog    | ENSMUSG00000018166  |
| P70424 | ErbB2   | 24405  | ERBB2IP  | erbB2 interacting protein                                  | ENSG00000112851     |
| Q80TH2 | ErbB2ip | 175693 | Smad3    | MAD homolog 3 (Drosophila)                                 | ENSMUSG00000032402  |
| Q80TH2 | ErbB2ip | 159056 | Smad2    | MAD homolog 2 (Drosophila)                                 | ENSMUSG00000024563  |
| Q80TH2 | ErbB2ip | 170516 | Smad1    | MAD homolog 1 (Drosophila)                                 | ENSMUSG00000031681  |
| Q80TH2 | ErbB2ip | 157503 | Smad4    | MAD homolog 4 (Drosophila)                                 | ENSMUSG00000024515  |
| Q80TH2 | ErbB2ip | 158890 | Smad7    | MAD homolog 7 (Drosophila)                                 | ENSMUSG00000025880  |
| Q80TH2 | ErbB2ip | 210591 | ErbB2    | v-erb-b2 erythroblastic leukemia viral oncogene homolog    | ENSMUSG00000062312  |
| Q80TH2 | ErbB2ip | 46068  | ERBB2    | v-erb-b2 erythroblastic leukemia viral oncogene homolog    | ENSG00000141736     |
| Q80TH2 | ErbB2ip | 27347  | CTNNB1   | catenin (cadherin-associated protein), beta 1, 88kDa       | ENSG00000168036     |
| Q80TH2 | ErbB2ip | 37007  | APC      | adenomatous polyposis coli                                 | ENSG00000134982     |
| Q80TH2 | ErbB2ip | 53133  | REL      | v-rel reticuloendotheliosis viral oncogene homolog (avian) | ENSG00000162924     |
| Q80TH2 | ErbB2ip | 193317 | Dlg4     | discs, large homolog 4 (Drosophila)                        | ENSMUSG00000020886  |
| Q80TH2 | ErbB2ip | 172382 | Pkp4     | plakophilin 4                                              | ENSMUSG00000026991  |
| Q80TH2 | ErbB2ip | 18366  | SMAD3    | SMAD family member 3                                       | ENSG00000166949     |
| Q61526 | ErbB3   | 210591 | ErbB2    | v-erb-b2 erythroblastic leukemia viral oncogene homolog    | ENSMUSG00000062312  |
| Q61526 | ErbB3   | 39891  | PA2G4    | proliferation-associated 2G4, 38kDa                        | ENSG00000170515     |
| Q9EQY0 | Ern1    | 189844 | Tnfrsf1a | tumor necrosis factor receptor superfamily, member 1a      | ENSMUSG00000030341  |
| Q9Z191 | Eya4    | 207066 | Mavs     | mitochondrial antiviral signaling protein                  | ENSMUSG00000037523  |
| Q9Z191 | Eya4    | 137341 | Tmem173  | transmembrane protein 173                                  | ENSMUSG00000024349  |
| Q9Z191 | Eya4    | 156238 | NlrX1    | NLR family member X1                                       | ENSMUSG00000032109  |
| Q9Z191 | Eya4    | 148158 | Six1     | sine oculis-related homeobox 1 homolog (Drosophila)        | ENSMUSG00000051367  |
| Q9Z191 | Eya4    | 201038 | Six2     | sine oculis-related homeobox 2 homolog (Drosophila)        | ENSMUSG00000024134  |
| Q61188 | Ezh2    | 198609 | Eed      | embryonic ectoderm development                             | ENSMUSG00000030619  |
| Q61188 | Ezh2    | 211954 | Ezh1     | enhancer of zeste homolog 1 (Drosophila)                   | ENSMUSG00000006920  |
| Q61188 | Ezh2    | 187572 | Mtf2     | metal response element binding transcription factor 2      | ENSMUSG000000029267 |
| Q61188 | Ezh2    | 190814 | Rbbp4    | retinoblastoma binding protein 4                           | ENSMUSG00000057236  |
| Q61188 | Ezh2    | 203783 | Suz12    | suppressor of zeste 12 homolog (Drosophila)                | ENSMUSG00000017548  |
| Q61188 | Ezh2    | 196120 | Aebp2    | AE binding protein 2                                       | ENSMUSG00000030232  |
| Q61188 | Ezh2    | 178190 | Morc3    | microorchidia 3                                            | ENSMUSG00000039456  |
| Q61188 | Ezh2    | 159635 | Stk38    | serine/threonine kinase 38                                 | ENSMUSG000000024006 |
| Q61188 | Ezh2    | 165162 | BC018507 | cDNA sequence BC018507                                     | ENSMUSG00000034525  |
| Q61188 | Ezh2    | 198429 | Stk38l   | serine/threonine kinase 38 like                            | ENSMUSG0000001630   |
| Q61188 | Ezh2    | 136486 | Bclaf1   | BCL2-associated transcription factor 1                     | ENSMUSG00000037608  |
| Q61188 | Ezh2    | 188132 | Thrap3   | thyroid hormone receptor associated protein 3              | ENSMUSG00000043962  |
| Q61188 | Ezh2    | 163429 | Ell      | elongation factor RNA polymerase II                        | ENSMUSG00000070002  |
| Q61188 | Ezh2    | 175374 | Trim35   | tripartite motif-containing 35                             | ENSMUSG00000022043  |
| Q61188 | Ezh2    | 153367 | Setx     | senataxin                                                  | ENSMUSG00000043535  |
| Q61188 | Ezh2    | 147776 | Jarid2   | jumoni1, AT rich interactive domain 2                      | ENSMUSG00000038518  |
| Q61188 | Ezh2    | 183758 | Rbbp7    | retinoblastoma binding protein 7                           | ENSMUSG00000031353  |
| Q61188 | Ezh2    | 183812 | Cited4   | Cbp/p300-interacting transactivator, with Glu/Asp-rich car | ENSMUSG00000070803  |
| Q61188 | Ezh2    | 155713 | Phf1     | PHD finger protein 1                                       | ENSMUSG00000024193  |
| Q61188 | Ezh2    | 207053 | Arntl    | aryl hydrocarbon receptor nuclear translocator-like        | ENSMUSG00000055116  |
| Q61188 | Ezh2    | 179578 | Rbl2     | retinoblastoma-like 2                                      | ENSMUSG00000031666  |
| Q61188 | Ezh2    | 172856 | Clock    | circadian locomotor output cycles kaput                    | ENSMUSG00000029238  |
| Q61188 | Ezh2    | 156033 | Htt      | huntingtin                                                 | ENSMUSG000000029104 |
| Q61188 | Ezh2    | 181230 | Cry1     | cryptochrom 1 (photolyase-like)                            | ENSMUSG00000020038  |
| Q61188 | Ezh2    | 191058 | Hdac1    | histone deacetylase 1                                      | ENSMUSG00000028800  |
| Q61188 | Ezh2    | 62820  | JARID2   | jumoni1, AT rich interactive domain 2                      | ENSG00000008083     |
| O88792 | F11r    | 161096 | Pick1    | protein interacting with C kinase 1                        | ENSMUSG00000068206  |
| O88792 | F11r    | 159280 | Mpdz     | multiple PDZ domain protein                                | ENSMUSG00000028402  |
| O88792 | F11r    | 57627  | CASK     | calcium/calmodulin-dependent serine protein kinase (MAC    | ENSG00000147044     |
| O88792 | F11r    | 191207 | Ptprb    | protein tyrosine phosphatase, receptor type, B             | ENSMUSG00000020154  |
| Q8R1F1 | Fam129b | 86083  | FAM129B  | family with sequence similarity 129, member B              | ENSG00000136830     |
| Q3UJU9 | Fam82a2 | 30077  | SNCA     | synuclein, alpha (non A4 component of amyloid precursor    | ENSG00000145335     |
| Q3UJU9 | Fam82a2 | 82596  | VAPB     | VAMP (vesicle-associated membrane protein)-associated d    | ENSG00000124164     |
| Q3UJU9 | Fam82a2 | 6587   | FAM82A2  | family with sequence similarity 82, member A2              | ENSG00000137824     |
| Q9JL70 | Fanca   | 139854 | Fancq    | Fanconi anemia, complementation group G                    | ENSMUSG00000028453  |
| P50652 | Fancc   | 72343  | C17orf70 | chromosome 17 open reading frame 70                        | ENSG00000185504     |
| P50652 | Fancc   | 45687  | FANCB    | Fanconi anemia, complementation group B                    | ENSG00000181544     |
| P50652 | Fancc   | 84018  | FANCE    | Fanconi anemia, complementation group E                    | ENSG00000112039     |
| P50652 | Fancc   | 45070  | LASP1    | LIM and SH3 protein 1                                      | ENSG00000002834     |
| P50652 | Fancc   | 128794 | Gstp1    | glutathione S-transferase, pi 1                            | ENSMUSG00000060803  |
| P50652 | Fancc   | 204005 | Por      | P450 (cytochrome) oxidoreductase                           | ENSMUSG00000005514  |
| P41047 | Fasl    | 168522 | Pstpip1  | proline-serine-threonine phosphatase-interacting protein   | ENSMUSG00000032322  |
| P41047 | Fasl    | 137313 | Ptpn12   | protein tyrosine phosphatase, non-receptor type 12         | ENSMUSG00000028771  |
| P19096 | Fasn    | 135771 | Prkdc    | protein kinase, DNA activated, catalytic polypeptide       | ENSMUSG00000022672  |
| P19096 | Fasn    | 165686 | Xrcc5    | X-ray repair complementing defective repair in Chinese ha  | ENSMUSG00000026187  |
| P19096 | Fasn    | 204574 | Usf1     | upstream transcription factor 1                            | ENSMUSG00000026641  |
| P19096 | Fasn    | 190822 | Kat2b    | K(llysine) acetyltransferase 2B                            | ENSMUSG00000000708  |
| P19096 | Fasn    | 133323 | Top2b    | topoisomerase (DNA) II beta                                | ENSMUSG000000017485 |
| Q8CD12 | Fbxo43  | 181497 | Cdc20    | cell division cycle 20 homolog (S. cerevisiae)             | ENSMUSG00000006398  |
| Q8K3B1 | Fbxo45  | 36944  | UNC13A   | unc-13 homolog A (C. elegans)                              | ENSG00000130477     |
| Q8K3B1 | Fbxo45  | 44621  | SKP1     | S-phase kinase-associated protein 1                        | ENSG00000113558     |
| Q8K3B1 | Fbxo45  | 64029  | UBC      | ubiquitin C                                                | ENSG00000150991     |
| Q8K285 | Fcho1   | 28871  | SMURF1   | SMAD specific E3 ubiquitin protein ligase 1                | ENSG00000198742     |
| Q8K285 | Fcho1   | 72930  | ACVR1    | activin A receptor, type I                                 | ENSG00000115170     |
| Q3UQN2 | Fcho2   | 201307 | Ubc      | ubiquitin C                                                | ENSMUSG00000008348  |
| Q920A9 | Fcrla   | 146254 | Traf2    | TNF receptor-associated factor 2                           | ENSMUSG00000026942  |
| P16879 | Fes     | 213066 | Nsf      | N-ethylmaleimide sensitive fusion protein                  | ENSMUSG00000034187  |

|        |         |        |          |                                                          |                     |
|--------|---------|--------|----------|----------------------------------------------------------|---------------------|
| O35450 | Fkbp1   | 163730 | Traf1    | TNF receptor-associated factor 1                         | ENSMUSG00000026875  |
| O35450 | Fkbp1   | 172055 | Hsp90aa1 | heat shock protein 90, alpha (cytosolic), class A member | ENSMUSG00000021270  |
| O35450 | Fkbp1   | 159848 | Cdkn1a   | cyclin-dependent kinase inhibitor 1A (P21)               | ENSMUSG00000023067  |
| P11276 | Fn1     | 195070 | Plcg2    | phospholipase C, gamma 2                                 | ENSMUSG00000034330  |
| P11276 | Fn1     | 171670 | Maq      | myelin-associated glycoprotein                           | ENSMUSG00000036634  |
| P11276 | Fn1     | 213175 | Itgb3    | integrin beta 3                                          | ENSMUSG00000020689  |
| P11276 | Fn1     | 189590 | Itga5    | integrin alpha 5 (fibronectin receptor alpha)            | ENSMUSG00000005555  |
| Q9R1E0 | Foxo1   | 200763 | Lrrpprc  | leucine-rich PPR-motif containing                        | ENSMUSG00000024120  |
| Q9R1E0 | Foxo1   | 9819   | TSC2     | tuberous sclerosis 2                                     | ENSG00000103197     |
| Q9R1E0 | Foxo1   | 173713 | Cebpa    | CCAAT/enhancer binding protein (C/EBP), alpha            | ENSMUSG00000034957  |
| Q9R1E0 | Foxo1   | 172131 | Wdfy2    | WD repeat and FYVE domain containing 2                   | ENSMUSG00000014547  |
| Q9R1E0 | Foxo1   | 174623 | Akt1     | thymoma viral proto-oncogene 1                           | ENSMUSG00000001729  |
| Q9R1E0 | Foxo1   | 160992 | Lmna     | lamin A                                                  | ENSMUSG00000028063  |
| Q9R1E0 | Foxo1   | 262062 | Gm3272   | predicted pseudogene 3272                                | ENSMUSG000000078967 |
| Q9R1E0 | Foxo1   | 73722  | AR       | androgen receptor                                        | ENSG00000169083     |
| Q9R1E0 | Foxo1   | 128986 | Foxp3    | forkhead box P3                                          | ENSMUSG00000039521  |
| Q9R1E0 | Foxo1   | 221122 | Mir182   | microRNA 182                                             | ENSMUSG00000076361  |
| Q9R1E0 | Foxo1   | 183749 | Il17ra   | interleukin 17 receptor A                                | ENSMUSG00000002897  |
| Q9R1E0 | Foxo1   | 195189 | Nr0b2    | nuclear receptor subfamily 0, group B, member 2          | ENSMUSG00000037583  |
| Q9R1E0 | Foxo1   | 147651 | Tsc2     | tuberous sclerosis 2                                     | ENSMUSG00000002496  |
| Q9R1E0 | Foxo1   | 64971  | KLK3     | kallikrein-related peptidase 3                           | ENSG00000142515     |
| Q9R1E0 | Foxo1   | 12340  | CREBBP   | CREB binding protein                                     | ENSG00000005339     |
| Q9R1E0 | Foxo1   | 161433 | Ar       | androgen receptor                                        | ENSMUSG00000046532  |
| Q9R1E0 | Foxo1   | 181579 | Hdac4    | histone deacetylase 4                                    | ENSMUSG00000026313  |
| Q9WVW4 | Fxr2    | 155533 | Dmrt2    | doublesex and mab-3 related transcription factor 2       | ENSMUSG000000048138 |
| O70421 | Fzd1    | 193317 | Dlg4     | discs, large homolog 4 (Drosophila)                      | ENSMUSG00000020886  |
| O70421 | Fzd1    | 71508  | DLG1     | discs, large homolog 1 (Drosophila)                      | ENSG00000075711     |
| O70421 | Fzd1    | 198905 | Dlg2     | discs, large homolog 2 (Drosophila)                      | ENSMUSG000000052572 |
| O70421 | Fzd1    | 152959 | Dlg1     | discs, large homolog 1 (Drosophila)                      | ENSMUSG00000022770  |
| O70421 | Fzd1    | 128306 | Lrp5     | low density lipoprotein receptor-related protein 5       | ENSMUSG000000024913 |
| O70421 | Fzd1    | 170604 | Wnt7b    | wingless-related MMTV integration site 7B                | ENSMUSG00000022382  |
| O70421 | Fzd1    | 181251 | Wnt1     | wingless-related MMTV integration site 1                 | ENSMUSG00000022997  |
| Q9WV18 | Gabbr1  | 209151 | Cst3     | cystatin C                                               | ENSMUSG00000027447  |
| Q9WV18 | Gabbr1  | 185288 | Sparcl1  | SPARC-like 1                                             | ENSMUSG00000029309  |
| Q9WV18 | Gabbr1  | 168935 | Aplp1    | amyloid beta (A4) precursor-like protein 1               | ENSMUSG00000006651  |
| Q9WV18 | Gabbr1  | 163151 | Hspa5    | heat shock protein 5                                     | ENSMUSG00000026864  |
| Q9WV18 | Gabbr1  | 155394 | Thy1     | thymus cell antigen 1, theta                             | ENSMUSG00000032011  |
| Q9WV18 | Gabbr1  | 207129 | Spon1    | spondin 1, (F-spondin) extracellular matrix protein      | ENSMUSG000000038156 |
| Q9WV18 | Gabbr1  | 146661 | Aplp2    | amyloid beta (A4) precursor-like protein 2               | ENSMUSG00000031996  |
| Q9WV18 | Gabbr1  | 211078 | Oat      | ornithine aminotransferase                               | ENSMUSG00000030934  |
| Q9WV18 | Gabbr1  | 151663 | Mat1a    | methionine adenosyltransferase I, alpha                  | ENSMUSG00000037798  |
| Q9WV18 | Gabbr1  | 172954 | App      | amyloid beta (A4) precursor protein                      | ENSMUSG00000022892  |
| Q9WV18 | Gabbr1  | 129626 | Pdia6    | protein disulfide isomerase associated 6                 | ENSMUSG00000020571  |
| Q9WV18 | Gabbr1  | 131138 | Calu     | calumenin                                                | ENSMUSG00000029767  |
| Q9WV18 | Gabbr1  | 152814 | Ppp1r2   | protein phosphatase 1, regulatory (inhibitor) subunit 2  | ENSMUSG000000047714 |
| Q9WV18 | Gabbr1  | 196143 | Epb4.113 | erythrocyte protein band 4.1-like 3                      | ENSMUSG00000024044  |
| Q9WV18 | Gabbr1  | 178669 | Ppiib    | peptidylprolyl isomerase B                               | ENSMUSG00000032383  |
| Q9WV18 | Gabbr1  | 174959 | Calr     | calreticulin                                             | ENSMUSG00000003814  |
| Q9WV18 | Gabbr1  | 182078 | Hsp90b1  | heat shock protein 90, beta (Grp94), member 1            | ENSMUSG00000020048  |
| Q9WV18 | Gabbr1  | 168591 | Canx     | calnexin                                                 | ENSMUSG000000020368 |
| Q9WV18 | Gabbr1  | 176351 | Cntn1    | contactin 1                                              | ENSMUSG00000055022  |
| Q9WV18 | Gabbr1  | 163105 | Ncam1    | neural cell adhesion molecule 1                          | ENSMUSG00000039542  |
| Q9WV18 | Gabbr1  | 168462 | Rcn2     | reticulocalbin 2                                         | ENSMUSG000000032320 |
| Q9WV18 | Gabbr1  | 205238 | Clstn1   | calsyntenin 1                                            | ENSMUSG00000039953  |
| Q9WV18 | Gabbr1  | 157064 | Hyou1    | hypoxia up-regulated 1                                   | ENSMUSG000000032115 |
| Q9WV18 | Gabbr1  | 171290 | Hspa4    | heat shock protein 4                                     | ENSMUSG00000020361  |
| Q9WV18 | Gabbr1  | 175327 | Srqa3    | SLIT-ROBO Rho GTPase activating protein 3                | ENSMUSG00000030257  |
| Q9WV18 | Gabbr1  | 141546 | Ganab    | alpha glucosidase 2 alpha neutral subunit                | ENSMUSG00000071650  |
| Q9WV18 | Gabbr1  | 192274 | Nfasc    | neurofascin                                              | ENSMUSG00000026442  |
| Q9WV18 | Gabbr1  | 178513 | Atp2b2   | ATPase, Ca++ transporting, plasma membrane 2             | ENSMUSG000000030302 |
| Q9WV18 | Gabbr1  | 146362 | Erp44    | endoplasmic reticulum protein 44                         | ENSMUSG00000028343  |
| Q9WV18 | Gabbr1  | 168858 | Linqo1   | leucine rich repeat and Iq domain containing 1           | ENSMUSG00000049556  |
| Q9WV18 | Gabbr1  | 186875 | Clstn3   | calsyntenin 3                                            | ENSMUSG000000008153 |
| Q9WV18 | Gabbr1  | 260830 | Prnp     | prion protein                                            | ENSMUSG00000079037  |
| Q9WV18 | Gabbr1  | 158252 | Cpe      | carboxypeptidase E                                       | ENSMUSG000000037852 |
| Q9WV18 | Gabbr1  | 133363 | Grm1     | glutamate receptor, metabotropic 1                       | ENSMUSG00000019828  |
| P62812 | Gabra1  | 195763 | Ppp3ca   | protein phosphatase 3, catalytic subunit, alpha isoform  | ENSMUSG00000028161  |
| P63137 | Gabrb2  | 195763 | Ppp3ca   | protein phosphatase 3, catalytic subunit, alpha isoform  | ENSMUSG00000028161  |
| Q99KY4 | Gak     | 153874 | Il12rb2  | interleukin 12 receptor, beta 2                          | ENSMUSG00000018341  |
| P23772 | Gata3   | 31309  | NR2F2    | nuclear receptor subfamily 2, group F, member 2          | ENSG00000185551     |
| P23772 | Gata3   | 172024 | Il4      | interleukin 4                                            | ENSMUSG00000000869  |
| P23772 | Gata3   | 190185 | Sfpi1    | SFFV proviral integration 1                              | ENSMUSG00000002111  |
| P23772 | Gata3   | 196773 | Runx3    | runt related transcription factor 3                      | ENSMUSG00000070691  |
| P23772 | Gata3   | 195602 | Stat6    | signal transducer and activator of transcription 6       | ENSMUSG00000002147  |
| P23772 | Gata3   | 172892 | Il3      | interleukin 3                                            | ENSMUSG000000018914 |
| P23772 | Gata3   | 173351 | Ecm1     | extracellular matrix protein 1                           | ENSMUSG00000028108  |
| P23772 | Gata3   | 210500 | Med1     | mediator complex subunit 1                               | ENSMUSG00000018160  |
| P23772 | Gata3   | 170640 | Ppara    | peroxisome proliferator activated receptor alpha         | ENSMUSG00000022383  |
| P23772 | Gata3   | 210153 | Tbx21    | T-box 21                                                 | ENSMUSG00000001444  |
| P58501 | Gcfc1   | 144904 | Grin1    | glutamate receptor, ionotropic, NMDA1 (zeta 1)           | ENSMUSG00000026959  |
| P03995 | Gfap    | 135418 | Ywhaz    | tyrosine 3-monooxygenase/tryptophan 5-monooxygenase      | ENSMUSG00000022285  |
| P03995 | Gfap    | 201307 | Ubc      | ubiquitin C                                              | ENSMUSG00000008348  |
| P28229 | Gjc1    | 4684   | TJP1     | tight junction protein 1 (zona occludens 1)              | ENSG00000104067     |
| P28229 | Gjc1    | 152172 | Gja1     | gap junction protein, alpha 1                            | ENSMUSG00000050953  |
| P28229 | Gjc1    | 191302 | Tjp1     | tight junction protein 1                                 | ENSMUSG00000030516  |
| P28229 | Gjc1    | 177759 | Tjp3     | tight junction protein 3                                 | ENSMUSG00000034917  |
| P28229 | Gjc1    | 17677  | TJP3     | tight junction protein 3 (zona occludens 3)              | ENSG00000105289     |
| Q8K297 | Glt25d1 | 160992 | Lmna     | lamin A                                                  | ENSMUSG00000028063  |
| P50247 | Gm4737  | 163730 | Traf1    | TNF receptor-associated factor 1                         | ENSMUSG00000026875  |

|        |         |        |         |                                                             |                     |
|--------|---------|--------|---------|-------------------------------------------------------------|---------------------|
| P58929 | Gmeb2   | 193716 | Gmeb1   | glucocorticoid modulatory element binding protein 1         | ENSMUSG00000028901  |
| P58929 | Gmeb2   | 203220 | Ubp1    | upstream binding protein 1                                  | ENSMUSG00000009741  |
| P58929 | Gmeb2   | 161559 | Vax2    | ventral anterior homeobox containing gene 2                 | ENSMUSG00000034777  |
| P58929 | Gmeb2   | 166617 | Lhx2    | LIM homeobox protein 2                                      | ENSMUSG00000000247  |
| P58929 | Gmeb2   | 136423 | Zfp277  | zinc finger protein 277                                     | ENSMUSG00000055917  |
| P58929 | Gmeb2   | 189829 | Mcm6    | minichromosome maintenance deficient 6 (MIS5 homolog)       | ENSMUSG00000026355  |
| P58929 | Gmeb2   | 210081 | Sp2     | Sp2 transcription factor                                    | ENSMUSG00000018678  |
| P58929 | Gmeb2   | 146608 | E4f1    | E4F transcription factor 1                                  | ENSMUSG00000024137  |
| P58929 | Gmeb2   | 144745 | Xbp1    | X-box binding protein 1                                     | ENSMUSG00000020484  |
| P58929 | Gmeb2   | 195445 | Nfkb1   | nuclear factor of kappa light polypeptide gene enhancer in  | ENSMUSG00000028163  |
| P58929 | Gmeb2   | 145390 | Aebp1   | AE binding protein 1                                        | ENSMUSG00000020473  |
| P58929 | Gmeb2   | 205730 | Polr1b  | polymerase (RNA) I polypeptide B                            | ENSMUSG00000027395  |
| Q9CW79 | Golqa1  | 150968 | Gopc    | golgi associated PDZ and coiled-coil motif containing       | ENSMUSG00000019861  |
| Q921M4 | Golqa2  | 183622 | Stk25   | serine/threonine kinase 25 (yeast)                          | ENSMUSG00000026277  |
| P23818 | Gria1   | 134233 | Exoc4   | exocyst complex component 4                                 | ENSMUSG00000029763  |
| P23818 | Gria1   | 214441 | Exoc7   | exocyst complex component 7                                 | ENSMUSG00000020792  |
| P23818 | Gria1   | 153567 | Gria2   | glutamate receptor, ionotropic, AMPA2 (alpha 2)             | ENSMUSG00000033981  |
| P23818 | Gria1   | 207842 | Snap25  | synaptosomal-associated protein 25                          | ENSMUSG00000027273  |
| P23818 | Gria1   | 203389 | Stx1a   | syntaxin 1A (brain)                                         | ENSMUSG00000007207  |
| P23818 | Gria1   | 207019 | Cltc    | clathrin, heavy polypeptide (Hc)                            | ENSMUSG00000047126  |
| P23818 | Gria1   | 193317 | Dlg4    | discs, large homolog 4 (Drosophila)                         | ENSMUSG00000020886  |
| P23818 | Gria1   | 150657 | Camk2a  | calcium/calmodulin-dependent protein kinase II alpha        | ENSMUSG00000024617  |
| P23818 | Gria1   | 210393 | Stx1b   | syntaxin 1B                                                 | ENSMUSG00000030806  |
| P23818 | Gria1   | 168358 | Sqstm1  | sequestosome 1                                              | ENSMUSG00000015837  |
| P23818 | Gria1   | 61811  | SQSTM1  | sequestosome 1                                              | ENSG00000161011     |
| P23818 | Gria1   | 26846  | HOMER2  | homer homolog 2 (Drosophila)                                | ENSG00000103942     |
| P23818 | Gria1   | 212642 | Grn     | granulin                                                    | ENSMUSG00000034708  |
| P23818 | Gria1   | 212876 | Cttn    | cortactin                                                   | ENSMUSG00000031078  |
| P23818 | Gria1   | 140717 | Gria3   | glutamate receptor, ionotropic, AMPA3 (alpha 3)             | ENSMUSG00000001986  |
| P23818 | Gria1   | 136511 | Hspa9   | heat shock protein 9                                        | ENSMUSG00000024359  |
| P23818 | Gria1   | 221928 | Cacng8  | calcium channel, voltage-dependent, gamma subunit 8         | ENSMUSG00000053395  |
| P23818 | Gria1   | 214779 | Actg1   | actin, gamma, cytoplasmic 1                                 | ENSMUSG00000062825  |
| P23818 | Gria1   | 179144 | Tubb5   | tubulin, beta 5                                             | ENSMUSG00000001525  |
| P23818 | Gria1   | 131447 | Gria4   | glutamate receptor, ionotropic, AMPA4 (alpha 4)             | ENSMUSG00000025892  |
| P23818 | Gria1   | 196404 | Naca    | nascent polypeptide-associated complex alpha polypeptide    | ENSMUSG00000061315  |
| P23818 | Gria1   | 182053 | Tuba1c  | tubulin, alpha 1C                                           | ENSMUSG00000043091  |
| P23818 | Gria1   | 211468 | Cnp     | 2',3'-cyclic nucleotide 3' phosphodiesterase                | ENSMUSG00000006782  |
| P23819 | Gria2   | 161096 | Pick1   | protein interacting with C kinase 1                         | ENSMUSG00000068206  |
| P23819 | Gria2   | 192287 | Grip1   | glutamate receptor interacting protein 1                    | ENSMUSG00000034813  |
| P23819 | Gria2   | 168910 | Cspg4   | chondroitin sulfate proteoglycan 4                          | ENSMUSG00000032911  |
| P23819 | Gria2   | 214441 | Exoc7   | exocyst complex component 7                                 | ENSMUSG00000020792  |
| P23819 | Gria2   | 134233 | Exoc4   | exocyst complex component 4                                 | ENSMUSG00000029763  |
| P23819 | Gria2   | 167158 | Exoc3   | exocyst complex component 3                                 | ENSMUSG00000034152  |
| P23819 | Gria2   | 175573 | Gria1   | glutamate receptor, ionotropic, AMPA1 (alpha 1)             | ENSMUSG00000020524  |
| P23819 | Gria2   | 168358 | Sqstm1  | sequestosome 1                                              | ENSMUSG00000015837  |
| P23819 | Gria2   | 61811  | SQSTM1  | sequestosome 1                                              | ENSG00000161011     |
| P23819 | Gria2   | 212642 | Grn     | granulin                                                    | ENSMUSG00000034708  |
| P23819 | Gria2   | 212876 | Cttn    | cortactin                                                   | ENSMUSG00000031078  |
| P23819 | Gria2   | 140717 | Gria3   | glutamate receptor, ionotropic, AMPA3 (alpha 3)             | ENSMUSG00000001986  |
| P23819 | Gria2   | 136511 | Hspa9   | heat shock protein 9                                        | ENSMUSG00000024359  |
| P23819 | Gria2   | 221928 | Cacng8  | calcium channel, voltage-dependent, gamma subunit 8         | ENSMUSG00000053395  |
| P23819 | Gria2   | 214779 | Actg1   | actin, gamma, cytoplasmic 1                                 | ENSMUSG00000062825  |
| P23819 | Gria2   | 179144 | Tubb5   | tubulin, beta 5                                             | ENSMUSG00000001525  |
| P23819 | Gria2   | 131447 | Gria4   | glutamate receptor, ionotropic, AMPA4 (alpha 4)             | ENSMUSG00000025892  |
| P23819 | Gria2   | 196404 | Naca    | nascent polypeptide-associated complex alpha polypeptide    | ENSMUSG00000061315  |
| P23819 | Gria2   | 182053 | Tuba1c  | tubulin, alpha 1C                                           | ENSMUSG00000043091  |
| P23819 | Gria2   | 211468 | Cnp     | 2',3'-cyclic nucleotide 3' phosphodiesterase                | ENSMUSG00000006782  |
| P23819 | Gria2   | 158793 | Atad1   | ATPase family, AAA domain containing 1                      | ENSMUSG00000013662  |
| Q922W8 | Gria4   | 214779 | Actg1   | actin, gamma, cytoplasmic 1                                 | ENSMUSG00000062825  |
| Q922W8 | Gria4   | 179144 | Tubb5   | tubulin, beta 5                                             | ENSMUSG00000001525  |
| Q922W8 | Gria4   | 212876 | Cttn    | cortactin                                                   | ENSMUSG00000031078  |
| Q922W8 | Gria4   | 175573 | Gria1   | glutamate receptor, ionotropic, AMPA1 (alpha 1)             | ENSMUSG00000020524  |
| Q922W8 | Gria4   | 153567 | Gria2   | glutamate receptor, ionotropic, AMPA2 (alpha 2)             | ENSMUSG00000033981  |
| Q922W8 | Gria4   | 140717 | Gria3   | glutamate receptor, ionotropic, AMPA3 (alpha 3)             | ENSMUSG00000001986  |
| Q922W8 | Gria4   | 196404 | Naca    | nascent polypeptide-associated complex alpha polypeptide    | ENSMUSG00000061315  |
| Q922W8 | Gria4   | 182053 | Tuba1c  | tubulin, alpha 1C                                           | ENSMUSG00000043091  |
| Q922W8 | Gria4   | 211468 | Cnp     | 2',3'-cyclic nucleotide 3' phosphodiesterase                | ENSMUSG00000006782  |
| Q61627 | Grid1   | 150968 | Gopc    | golgi associated PDZ and coiled-coil motif containing       | ENSMUSG00000019861  |
| Q61625 | Grid2   | 187609 | Ptpn4   | protein tyrosine phosphatase, non-receptor type 4           | ENSMUSG00000026384  |
| Q61625 | Grid2   | 150968 | Gopc    | golgi associated PDZ and coiled-coil motif containing       | ENSMUSG00000019861  |
| Q61625 | Grid2   | 212053 | Becn1   | beclin 1, autophagy related                                 | ENSMUSG00000035086  |
| Q61625 | Grid2   | 156201 | Grik5   | glutamate receptor, ionotropic, kainate 5 (gamma 2)         | ENSMUSG00000003378  |
| Q61625 | Grid2   | 178238 | Cbln1   | cerebellin 1 precursor protein                              | ENSMUSG00000031654  |
| Q61625 | Grid2   | 201803 | Nrxn1   | neurexin I                                                  | ENSMUSG00000024109  |
| Q61625 | Grid2   | 160964 | Nrxn3   | neurexin III                                                | ENSMUSG00000066392  |
| Q61625 | Grid2   | 207711 | Grid2ip | glutamate receptor, ionotropic, delta 2 (Grid2) interacting | ENSMUSG00000010825  |
| Q61625 | Grid2   | 212862 | Shank2  | SH3/ankyrin domain gene 2                                   | ENSMUSG000000037541 |
| Q61626 | Grik5   | 152790 | Grid2   | glutamate receptor, ionotropic, delta 2                     | ENSMUSG000000071424 |
| Q8VD04 | Gripap1 | 148417 | Mapk8   | mitogen-activated protein kinase 8                          | ENSMUSG00000021936  |
| Q8VD04 | Gripap1 | 182342 | Map3k1  | mitogen-activated protein kinase kinase 1                   | ENSMUSG00000021754  |
| Q8VD04 | Gripap1 | 196509 | Irf8    | interferon regulatory factor 8                              | ENSMUSG00000041515  |
| Q8VEB1 | Grk5    | 53295  | HDAC5   | histone deacetylase 5                                       | ENSG00000108840     |
| Q2NLS1 | Gsk3a   | 211637 | Stat3   | signal transducer and activator of transcription 3          | ENSMUSG00000004040  |
| Q2NLS1 | Gsk3a   | 135936 | Ifngr1  | interferon gamma receptor 1                                 | ENSMUSG00000020009  |
| Q2NLS1 | Gsk3a   | 184766 | Ctndn1  | catenin (cadherin associated protein), delta 1              | ENSMUSG00000034101  |
| Q2NLS1 | Gsk3a   | 197968 | Ppp1cc  | protein phosphatase 1, catalytic subunit, gamma isoform     | ENSMUSG00000004455  |
| P13020 | Gsn     | 195070 | Plcg2   | phospholipase C, gamma 2                                    | ENSMUSG00000034330  |
| Q149F3 | Gspst2  | 38885  | UPF1    | UPF1 regulator of nonsense transcripts homolog (yeast)      | ENSG00000005007     |
| Q9D902 | Gtf2e2  | 174265 | Poc5    | POC5 centriolar protein homolog (Chlamydomonas)             | ENSMUSG00000021671  |

|        |           |        |          |                                                                                   |                     |
|--------|-----------|--------|----------|-----------------------------------------------------------------------------------|---------------------|
| Q9D902 | Gtf2e2    | 141021 | Ikkbb    | inhibitor of kappaB kinase beta                                                   | ENSMUSG00000031537  |
| Q9D902 | Gtf2e2    | 189502 | Nfe2     | nuclear factor, erythroid derived 2                                               | ENSMUSG00000058794  |
| Q9D902 | Gtf2e2    | 159505 | Gtf2e1   | general transcription factor II E, polypeptide 1 (alpha subunit)                  | ENSMUSG00000022828  |
| Q9D902 | Gtf2e2    | 191571 | Khdrbs1  | KH domain containing, RNA binding, signal transduction associated protein 1       | ENSMUSG00000028790  |
| Q9D902 | Gtf2e2    | 184959 | Dazap2   | DAZ associated protein 2                                                          | ENSMUSG00000000346  |
| Q9D902 | Gtf2e2    | 204739 | Tardbp   | TAR DNA binding protein                                                           | ENSMUSG00000041459  |
| Q9D902 | Gtf2e2    | 171712 | Pml      | promyelocytic leukemia                                                            | ENSMUSG00000036986  |
| Q9D902 | Gtf2e2    | 161051 | Tlx3     | T-cell leukemia, homeobox 3                                                       | ENSMUSG00000040610  |
| Q3THK3 | Gtf2f1    | 213090 | Cebpb    | CCAAT/enhancer binding protein (C/EBP), beta                                      | ENSMUSG00000056501  |
| P0C056 | H2afz     | 171427 | Btk      | Bruton agammaglobulinemia tyrosine kinase                                         | ENSMUSG000000031264 |
| P53702 | Hccs      | 156517 | Slc1a1   | solute carrier family 1 (neuronal/epithelial high affinity glutamate transporter) | ENSMUSG00000024935  |
| P53702 | Hccs      | 141324 | Xiap     | X-linked inhibitor of apoptosis                                                   | ENSMUSG00000025860  |
| P53702 | Hccs      | 133125 | Birc2    | baculoviral IAP repeat-containing 2                                               | ENSMUSG00000057367  |
| P53702 | Hccs      | 133177 | Birc3    | baculoviral IAP repeat-containing 3                                               | ENSMUSG000000032000 |
| P53702 | Hccs      | 85142  | XIAP     | X-linked inhibitor of apoptosis                                                   | ENSG00000101966     |
| Q6NVF4 | Helb      | 196509 | Irf8     | interferon regulatory factor 8                                                    | ENSMUSG00000041515  |
| Q60848 | Hells     | 127800 | Dnmt3a   | DNA methyltransferase 3A                                                          | ENSMUSG00000020661  |
| Q60848 | Hells     | 210140 | Dnmt3b   | DNA methyltransferase 3B                                                          | ENSMUSG00000027478  |
| Q60848 | Hells     | 214665 | Cbx2     | chromobox homolog 2 (Drosophila Pc class)                                         | ENSMUSG00000025577  |
| Q60848 | Hells     | 139744 | Bmi1     | Bmi1 polycomb ring finger oncogene                                                | ENSMUSG000000026739 |
| Q60848 | Hells     | 210296 | Pcaf2    | polycomb group ring finger 2                                                      | ENSMUSG00000018537  |
| Q60848 | Hells     | 178408 | Pou5f1   | POU domain, class 5, transcription factor 1                                       | ENSMUSG00000024406  |
| Q60848 | Hells     | 187207 | Tcfcp2l1 | transcription factor CP2-like 1                                                   | ENSMUSG000000026380 |
| Q6DFV5 | Helz      | 132723 | Sh3yl1   | Sh3 domain YSC-like 1                                                             | ENSMUSG00000020669  |
| Q6DFV5 | Helz      | 208502 | Smyd2    | SET and MYND domain containing 2                                                  | ENSMUSG000000026603 |
| P35428 | Hes1      | 151388 | Rxra     | retinoid X receptor alpha                                                         | ENSMUSG00000015846  |
| P35428 | Hes1      | 150133 | Trp63    | transformation related protein 63                                                 | ENSMUSG000000022510 |
| P35428 | Hes1      | 140708 | Nfkbia   | nuclear factor of kappa light polypeptide gene enhancer in B-cells                | ENSMUSG00000021025  |
| P35428 | Hes1      | 132298 | Rela     | v-rel reticuloendotheliosis viral oncogene homolog A (avian)                      | ENSMUSG00000024927  |
| P35428 | Hes1      | 191058 | Hdac1    | histone deacetylase 1                                                             | ENSMUSG000000028800 |
| P35428 | Hes1      | 212520 | Hdac5    | histone deacetylase 5                                                             | ENSMUSG00000008855  |
| P35428 | Hes1      | 169132 | Chuk     | conserved helix-loop-helix ubiquitous kinase                                      | ENSMUSG00000025199  |
| P35428 | Hes1      | 141021 | Ikkbb    | inhibitor of kappaB kinase beta                                                   | ENSMUSG00000031537  |
| P35428 | Hes1      | 73128  | TLE1     | transducin-like enhancer of split 1 (E(sp1) homolog, Drosophila)                  | ENSG00000196781     |
| P35428 | Hes1      | 181149 | Hes6     | hairly and enhancer of split 6 (Drosophila)                                       | ENSMUSG000000067071 |
| P35428 | Hes1      | 129513 | Crebbp   | CREB binding protein                                                              | ENSMUSG00000022521  |
| P35428 | Hes1      | 159441 | Sirt1    | sirtuin 1 (silent mating type information regulation 2, homolog 1)                | ENSMUSG00000020063  |
| P35428 | Hes1      | 156977 | Jak2     | Janus kinase 2                                                                    | ENSMUSG000000024789 |
| Q08048 | Hgf       | 37371  | MET      | met proto-oncogene (hepatocyte growth factor receptor)                            | ENSG00000105976     |
| Q9R1Y5 | Hic1      | 177837 | Tcf7l2   | transcription factor 7-like 2, T-cell specific, HMG-box                           | ENSMUSG000000024985 |
| Q9R1Y5 | Hic1      | 75847  | SIRT1    | sirtuin 1                                                                         | ENSG00000096717     |
| Q9R1Y5 | Hic1      | 159441 | Sirt1    | sirtuin 1 (silent mating type information regulation 2, homolog 1)                | ENSMUSG00000020063  |
| Q9JKY5 | Hip1r     | 155851 | Arhgef1  | Rho guanine nucleotide exchange factor (GEF) 1                                    | ENSMUSG000000040940 |
| Q9JKY5 | Hip1r     | 633642 | CLTA     | clathrin, light chain A                                                           | ENSBTAG00000001137  |
| Q9JKY5 | Hip1r     | 645068 | CLTB     | clathrin, light chain B                                                           | ENSBTAG00000010740  |
| O88904 | Hipk1     | 21462  | PML      | promyelocytic leukemia                                                            | ENSG00000140464     |
| O88904 | Hipk1     | 82726  | DAXX     | death-domain associated protein                                                   | ENSG00000204209     |
| O88904 | Hipk1     | 168138 | Daxx     | Fas death domain-associated protein                                               | ENSMUSG00000002307  |
| O88904 | Hipk1     | 211193 | Ctbp2    | C-terminal binding protein 2                                                      | ENSMUSG00000030970  |
| Q9ERH7 | Hipk3     | 168138 | Daxx     | Fas death domain-associated protein                                               | ENSMUSG00000002307  |
| Q9ERH7 | Hipk3     | 212910 | Fadd     | Fas (TNFRSF6)-associated via death domain                                         | ENSMUSG00000031077  |
| Q9ERH7 | Hipk3     | 159577 | Fas      | Fas (TNF receptor superfamily member 6)                                           | ENSMUSG00000024778  |
| P68433 | Hist1h3i  | 147481 | Cbx3     | chromobox homolog 3 (Drosophila HP1 gamma)                                        | ENSMUSG000000029836 |
| P68433 | Hist1h3i  | 189469 | Cbx5     | chromobox homolog 5 (Drosophila HP1a)                                             | ENSMUSG00000009575  |
| P68433 | Hist1h3i  | 209987 | Cbx1     | chromobox homolog 1 (Drosophila HP1 beta)                                         | ENSMUSG00000018666  |
| P68433 | Hist1h3i  | 135418 | Ywhaz    | tyrosine 3-monooxygenase/tryptophan 5-monooxygenase activator                     | ENSMUSG00000022285  |
| P68433 | Hist1h3i  | 200597 | Ywhae    | tyrosine 3-monooxygenase/tryptophan 5-monooxygenase activator                     | ENSMUSG00000020849  |
| P68433 | Hist1h3i  | 140748 | Carm1    | coactivator-associated arginine methyltransferase 1                               | ENSMUSG000000032185 |
| P68433 | Hist1h3i  | 190822 | Kat2b    | K(lysine) acetyltransferase 2B                                                    | ENSMUSG00000000708  |
| P68433 | Hist1h3i  | 38481  | SETD7    | SET domain containing (lysine methyltransferase) 7                                | ENSG00000145391     |
| P68433 | Hist1h3i  | 209987 | Cbx1     | chromobox homolog 1 (Drosophila HP1 beta)                                         | ENSMUSG00000018666  |
| Q64522 | Hist2h2ab | 30077  | SNCA     | synuclein, alpha (non A4 component of amyloid precursor protein)                  | ENSG00000145335     |
| Q8BFU2 | Hist3h2a  | 198910 | Kdm2b    | lysine (K)-specific demethylase 2B                                                | ENSMUSG000000029475 |
| Q8BFU2 | Hist3h2a  | 198115 | Rnf2     | ring finger protein 2                                                             | ENSMUSG00000026484  |
| Q8BFU2 | Hist3h2a  | 159954 | Pcaf1    | polycomb group ring finger 1                                                      | ENSMUSG000000069678 |
| P30681 | Hmqb2     | 96561  | POU3F1   | POU class 3 homeobox 1                                                            | ENSG00000185668     |
| P30681 | Hmqb2     | 68800  | PGR      | progesterone receptor                                                             | ENSG00000082175     |
| P30681 | Hmqb2     | 104534 | POU2F1   | POU class 2 homeobox 1                                                            | ENSG00000143190     |
| P30681 | Hmqb2     | 53773  | POU2F2   | POU class 2 homeobox 2                                                            | ENSG00000028277     |
| P30681 | Hmqb2     | 97997  | ESR1     | estrogen receptor 1                                                               | ENSG00000091831     |
| P30681 | Hmqb2     | 51637  | NR3C1    | nuclear receptor subfamily 3, group C, member 1 (glucocorticoid)                  | ENSG00000113580     |
| P30681 | Hmqb2     | 77210  | POU5F1   | POU class 5 homeobox 1                                                            | ENSG00000204531     |
| P30681 | Hmqb2     | 194292 | Lef1     | lymphoid enhancer binding factor 1                                                | ENSMUSG00000027985  |
| P22361 | Hnf1a     | 211637 | Stat3    | signal transducer and activator of transcription 3                                | ENSMUSG00000004040  |
| P22361 | Hnf1a     | 211515 | Nkx6-2   | NK6 homeobox 2                                                                    | ENSMUSG000000041309 |
| P22361 | Hnf1a     | 163137 | Emx1     | empty spiracles homolog 1 (Drosophila)                                            | ENSMUSG000000037726 |
| P22361 | Hnf1a     | 159441 | Sirt1    | sirtuin 1 (silent mating type information regulation 2, homolog 1)                | ENSMUSG00000020063  |
| P22361 | Hnf1a     | 205753 | Hnf1b    | HNF1 homeobox B                                                                   | ENSMUSG000000020679 |
| P22361 | Hnf1a     | 205243 | Ctnnb1   | catenin (cadherin associated protein), beta 1                                     | ENSMUSG00000006932  |
| P22361 | Hnf1a     | 161442 | Gtf2a1   | general transcription factor II A, 1                                              | ENSMUSG000000020962 |
| P22361 | Hnf1a     | 155077 | Pcbd1    | pterin 4 alpha carbinolamine dehydratase/dimerization cofactor                    | ENSMUSG00000020098  |
| P27889 | Hnf1b     | 155077 | Pcbd1    | pterin 4 alpha carbinolamine dehydratase/dimerization cofactor                    | ENSMUSG00000020098  |
| P27889 | Hnf1b     | 193173 | Hnf1a    | HNF1 homeobox A                                                                   | ENSMUSG000000029556 |
| O35737 | Hnrnp1    | 61485  | HNRNPH1  | heterogeneous nuclear ribonucleoprotein H1 (H)                                    | ENSG00000169045     |
| O35737 | Hnrnp1    | 89921  | PLOD1    | procollagen-lysine, 2-oxoglutarate 5-dioxygenase 1                                | ENSG00000083444     |
| O35737 | Hnrnp1    | 2920   | PRMT5    | protein arginine methyltransferase 5                                              | ENSG00000100462     |
| O35737 | Hnrnp1    | 37588  | HNRNPA1  | heterogeneous nuclear ribonucleoprotein A1                                        | ENSG00000135486     |
| O35737 | Hnrnp1    | 101061 | WDR77    | WD repeat domain 77                                                               | ENSG00000116455     |
| Q08624 | Hoxc4     | 202815 | Pou2f1   | POU domain, class 2, transcription factor 1                                       | ENSMUSG00000026556  |



|        |          |        |           |                                                                      |                     |
|--------|----------|--------|-----------|----------------------------------------------------------------------|---------------------|
| Q08624 | Hoxc4    | 162874 | Pbx3      | pre B-cell leukemia transcription factor 3                           | ENSMUSG00000038718  |
| Q08624 | Hoxc4    | 213166 | Sall4     | sal-like 4 (Drosophila)                                              | ENSMUSG00000027547  |
| Q08624 | Hoxc4    | 192631 | Alx4      | aristaless-like homeobox 4                                           | ENSMUSG00000040310  |
| Q08624 | Hoxc4    | 203379 | Pbx1      | pre B-cell leukemia transcription factor 1                           | ENSMUSG00000052534  |
| P32043 | Hoxc5    | 203379 | Pbx1      | pre B-cell leukemia transcription factor 1                           | ENSMUSG00000052534  |
| P32043 | Hoxc5    | 168174 | Polr2i    | polymerase (RNA) II (DNA directed) polypeptide I                     | ENSMUSG00000019738  |
| P32043 | Hoxc5    | 162874 | Pbx3      | pre B-cell leukemia transcription factor 3                           | ENSMUSG00000038718  |
| P70217 | Hoxd13   | 152330 | Meis1     | Meis homeobox 1                                                      | ENSMUSG00000020160  |
| P70217 | Hoxd13   | 157537 | Smad5     | MAD homolog 5 (Drosophila)                                           | ENSMUSG00000021540  |
| P70217 | Hoxd13   | 170516 | Smad1     | MAD homolog 1 (Drosophila)                                           | ENSMUSG00000031681  |
| P70217 | Hoxd13   | 192631 | Alx4      | aristaless-like homeobox 4                                           | ENSMUSG00000040310  |
| P70217 | Hoxd13   | 191345 | Sox15     | SRY-box containing gene 15                                           | ENSMUSG00000041287  |
| P70217 | Hoxd13   | 156149 | Hand2     | heart and neural crest derivatives expressed transcript 2            | ENSMUSG00000038193  |
| Q61645 | Hr       | 151644 | Rorb      | RAR-related orphan receptor beta                                     | ENSMUSG00000036192  |
| Q61645 | Hr       | 148062 | Hoxa11    | homeobox A11                                                         | ENSMUSG00000038210  |
| P50172 | Hsd11b1  | 167029 | Cyp2d10   | cytochrome P450, family 2, subfamily d, polypeptide 10               | ENSMUSG00000014372  |
| P50172 | Hsd11b1  | 138135 | Pgrmc1    | progesterone receptor membrane component 1                           | ENSMUSG00000006373  |
| P50172 | Hsd11b1  | 177042 | Fmo5      | flavin containing monooxygenase 5                                    | ENSMUSG00000028088  |
| P50172 | Hsd11b1  | 207430 | Ephx1     | epoxide hydrolase 1, microsomal                                      | ENSMUSG00000038776  |
| P50172 | Hsd11b1  | 208760 | Cyp3a11   | cytochrome P450, family 3, subfamily a, polypeptide 11               | ENSMUSG00000056035  |
| P38532 | Hsf1     | 210740 | Csf3      | colony stimulating factor 3 (granulocyte)                            | ENSMUSG00000038067  |
| P38532 | Hsf1     | 132298 | Rela      | v-rel reticuloendotheliosis viral oncogene homolog A (avian)         | ENSMUSG00000024927  |
| P38532 | Hsf1     | 208712 | Atf3      | activating transcription factor 3                                    | ENSMUSG00000026628  |
| P07901 | Hsp90aa1 | 164253 | Itgb1bp2  | integrin beta 1 binding protein 2                                    | ENSMUSG00000031312  |
| P07901 | Hsp90aa1 | 48331  | KCNH2     | potassium voltage-gated channel, subfamily H (eag-related)           | ENSG000000055118    |
| P07901 | Hsp90aa1 | 128968 | Aip       | aryl-hydrocarbon receptor-interacting protein                        | ENSMUSG00000024847  |
| P07901 | Hsp90aa1 | 134957 | Ahr       | aryl-hydrocarbon receptor                                            | ENSMUSG00000019256  |
| P07901 | Hsp90aa1 | 150031 | Sim1      | single-minded homolog 1 (Drosophila)                                 | ENSMUSG000000119913 |
| P07901 | Hsp90aa1 | 137672 | Mapk1     | mitogen-activated protein kinase 1                                   | ENSMUSG00000063358  |
| P07901 | Hsp90aa1 | 209781 | Mapk3     | mitogen-activated protein kinase 3                                   | ENSMUSG00000063065  |
| P07901 | Hsp90aa1 | 155530 | Slc34a1   | solute carrier family 34 (sodium phosphate), member 1                | ENSMUSG00000021490  |
| P07901 | Hsp90aa1 | 136047 | Chordc1   | cysteine and histidine-rich domain (CHORD)-containing, zinc finger   | ENSMUSG00000001774  |
| P07901 | Hsp90aa1 | 132962 | Map3k7    | mitogen-activated protein kinase kinase kinase 7                     | ENSMUSG00000028284  |
| P07901 | Hsp90aa1 | 139272 | Cdc37     | cell division cycle 37 homolog (S. cerevisiae)                       | ENSMUSG00000019471  |
| P07901 | Hsp90aa1 | 132816 | Tab2      | TGF-beta activated kinase 1/MAP3K7 binding protein 2                 | ENSMUSG00000015755  |
| P07901 | Hsp90aa1 | 163423 | Tab1      | TGF-beta activated kinase 1/MAP3K7 binding protein 1                 | ENSMUSG00000022414  |
| P07901 | Hsp90aa1 | 174623 | Akt1      | thymoma viral proto-oncogene 1                                       | ENSMUSG00000001729  |
| P07901 | Hsp90aa1 | 155873 | Gdi1      | guanosine diphosphate (GDP) dissociation inhibitor 1                 | ENSMUSG00000015291  |
| P07901 | Hsp90aa1 | 164008 | Rab3a     | RAB3A, member RAS oncogene family                                    | ENSMUSG00000031840  |
| P07901 | Hsp90aa1 | 214134 | Dnajc5    | DnaJ (Hsp40) homolog, subfamily C, member 5                          | ENSMUSG00000000826  |
| P07901 | Hsp90aa1 | 606688 | Hspa1a    | heat shock protein 1A                                                | ENSMUSG00000091971  |
| P07901 | Hsp90aa1 | 181123 | Irf3      | interferon regulatory factor 3                                       | ENSMUSG00000003184  |
| P07901 | Hsp90aa1 | 20861  | HSP90AA1  | heat shock protein 90kDa alpha (cytosolic), class A member           | ENSG00000080824     |
| P07901 | Hsp90aa1 | 201307 | Ubc       | ubiquitin C                                                          | ENSMUSG00000008348  |
| P07901 | Hsp90aa1 | 193222 | Traf6     | TNF receptor-associated factor 6                                     | ENSMUSG000000027164 |
| P07901 | Hsp90aa1 | 172572 | Fkbp1     | FK506 binding protein-like                                           | ENSMUSG00000033739  |
| P07901 | Hsp90aa1 | 137697 | Slc17a1   | solute carrier family 17 (sodium phosphate), member 1                | ENSMUSG00000021335  |
| P07901 | Hsp90aa1 | 198038 | Tctn1     | tectonic family member 1                                             | ENSMUSG00000038593  |
| P07901 | Hsp90aa1 | 136801 | Ahi1      | Abelson helper integration site 1                                    | ENSMUSG00000019986  |
| P07901 | Hsp90aa1 | 181938 | Tuba1b    | tubulin, alpha 1B                                                    | ENSMUSG00000023004  |
| P07901 | Hsp90aa1 | 211364 | Jup       | junction plakoglobin                                                 | ENSMUSG00000001552  |
| P07901 | Hsp90aa1 | 207470 | Actb      | actin, beta                                                          | ENSMUSG00000029580  |
| P07901 | Hsp90aa1 | 153613 | Hspa8     | heat shock protein 8                                                 | ENSMUSG00000015656  |
| P07901 | Hsp90aa1 | 163151 | Hspa5     | heat shock protein 5                                                 | ENSMUSG00000026864  |
| P07901 | Hsp90aa1 | 146462 | Invs      | inversin                                                             | ENSMUSG000000028344 |
| P07901 | Hsp90aa1 | 136511 | Hspa9     | heat shock protein 9                                                 | ENSMUSG00000024359  |
| P07901 | Hsp90aa1 | 179144 | Tubb5     | tubulin, beta 5                                                      | ENSMUSG00000001525  |
| P07901 | Hsp90aa1 | 207771 | Mks1      | Meckel syndrome, type 1                                              | ENSMUSG00000034121  |
| P07901 | Hsp90aa1 | 160972 | Cc2d2a    | coiled-coil and C2 domain containing 2A                              | ENSMUSG00000039765  |
| P07901 | Hsp90aa1 | 149554 | Fhl2      | four and a half LIM domains 2                                        | ENSMUSG000000008136 |
| P07901 | Hsp90aa1 | 173563 | Cct8      | chaperonin containing Tcp1, subunit 8 (theta)                        | ENSMUSG00000025613  |
| P07901 | Hsp90aa1 | 185482 | Hsp90ab1  | heat shock protein 90 alpha (cytosolic), class B member 1            | ENSMUSG00000023944  |
| P63017 | Hspa8    | 48331  | KCNH2     | potassium voltage-gated channel, subfamily H (eag-related)           | ENSG000000055118    |
| P63017 | Hspa8    | 145597 | Pold2     | polymerase (DNA directed), delta 2, regulatory subunit               | ENSMUSG00000020471  |
| P63017 | Hspa8    | 191542 | Cct2      | chaperonin containing Tcp1, subunit 2 (beta)                         | ENSMUSG00000034024  |
| P63017 | Hspa8    | 173563 | Cct8      | chaperonin containing Tcp1, subunit 8 (theta)                        | ENSMUSG00000025613  |
| P63017 | Hspa8    | 170572 | Selenbp2  | selenium binding protein 2                                           | ENSMUSG00000068877  |
| P63017 | Hspa8    | 168985 | Aldh1l1   | aldehyde dehydrogenase 1 family, member L1                           | ENSMUSG00000030088  |
| P63017 | Hspa8    | 132917 | Cct5      | chaperonin containing Tcp1, subunit 5 (epsilon)                      | ENSMUSG00000022234  |
| P63017 | Hspa8    | 88484  | SET       | SET nuclear oncogene                                                 | ENSG00000119335     |
| P63017 | Hspa8    | 207470 | Actb      | actin, beta                                                          | ENSMUSG00000029580  |
| P63017 | Hspa8    | 160648 | Fbp1      | fructose biphosphatase 1                                             | ENSMUSG00000069805  |
| P63017 | Hspa8    | 196497 | Atp5b     | ATP synthase, H+ transporting mitochondrial F1 complex, beta subunit | ENSMUSG00000025393  |
| P63017 | Hspa8    | 147385 | Hnrnpa2b1 | heterogeneous nuclear ribonucleoprotein A2/B1                        | ENSMUSG00000004980  |
| P63017 | Hspa8    | 175870 | Mta1      | metastasis associated 1                                              | ENSMUSG000000021144 |
| P63017 | Hspa8    | 178482 | Alb       | albumin                                                              | ENSMUSG00000029368  |
| P63017 | Hspa8    | 136275 | Pygm      | muscle glycogen phosphorylase                                        | ENSMUSG00000032648  |
| P63017 | Hspa8    | 137484 | Tcp1      | t-complex protein 1                                                  | ENSMUSG00000068039  |
| P63017 | Hspa8    | 209641 | Csnk2a1   | casein kinase 2, alpha 1 polypeptide                                 | ENSMUSG00000074698  |
| P63017 | Hspa8    | 163151 | Hspa5     | heat shock protein 5                                                 | ENSMUSG00000026864  |
| P63017 | Hspa8    | 140436 | Dnm2      | dynamitin 2                                                          | ENSMUSG00000033335  |
| P63017 | Hspa8    | 165898 | Ftcd      | formiminotransferase cyclodeaminase                                  | ENSMUSG00000001155  |
| P63017 | Hspa8    | 152187 | Eif2s1    | eukaryotic translation initiation factor 2, subunit 1 alpha          | ENSMUSG00000021116  |
| P63017 | Hspa8    | 145944 | Gm5506    | predicted gene 5506                                                  | ENSMUSG00000059040  |
| P63017 | Hspa8    | 187530 | Gm10116   | predicted pseudogene 10116                                           | ENSMUSG000000662382 |
| P63017 | Hspa8    | 56882  | BAG1      | BCL2-associated athanogene                                           | ENSG00000107262     |
| P63017 | Hspa8    | 161623 | Stxbp1    | syntaxin binding protein 1                                           | ENSMUSG00000026797  |
| P63017 | Hspa8    | 154521 | Tnk2      | tyrosine kinase, non-receptor, 2                                     | ENSMUSG00000022791  |
| P63017 | Hspa8    | 130893 | Klc2      | kinesin light chain 2                                                | ENSMUSG00000024862  |

|        |             |        |              |                                                            |                     |
|--------|-------------|--------|--------------|------------------------------------------------------------|---------------------|
| P63017 | Hspa8       | 186957 | Eef1a1       | eukaryotic translation elongation factor 1 alpha 1         | ENSMUSG000000037742 |
| P63017 | Hspa8       | 168772 | Kif5c        | kinesin family member 5C                                   | ENSMUSG000000026764 |
| P63017 | Hspa8       | 159551 | Dnm1         | dynamilin 1                                                | ENSMUSG000000026825 |
| P63017 | Hspa8       | 133375 | Tubgcp3      | tubulin, gamma complex associated protein 3                | ENSMUSG00000000759  |
| P63017 | Hspa8       | 173074 | Actr1a       | ARP1 actin-related protein 1 homolog A, centractin alpha   | ENSMUSG000000025228 |
| P63017 | Hspa8       | 211869 | Tubq1        | tubulin, gamma 1                                           | ENSMUSG000000035198 |
| P63017 | Hspa8       | 137748 | Kcnma1       | potassium large conductance calcium-activated channel, s   | ENSMUSG000000063142 |
| P63017 | Hspa8       | 191571 | Khdrbs1      | KH domain containing, RNA binding, signal transduction a   | ENSMUSG000000028790 |
| P63017 | Hspa8       | 132410 | Pik3c3       | phosphoinositide-3-kinase, class 3                         | ENSMUSG000000033628 |
| P63017 | Hspa8       | 156172 | Atp1a3       | ATPase, Na+/K+ transporting, alpha 3 polypeptide           | ENSMUSG000000040907 |
| P63017 | Hspa8       | 205352 | Atp1a2       | ATPase, Na+/K+ transporting, alpha 2 polypeptide           | ENSMUSG00000007097  |
| P63017 | Hspa8       | 186932 | A830010M20Ri | RIKEN cDNA A830010M20 gene                                 | ENSMUSG000000044060 |
| P63017 | Hspa8       | 144990 | Actr1b       | ARP1 actin-related protein 1 homolog B, centractin beta (  | ENSMUSG000000037351 |
| P63017 | Hspa8       | 195461 | Pik3r4       | phosphatidylinositol 3 kinase, regulatory subunit, polypep | ENSMUSG000000032571 |
| P63017 | Hspa8       | 179812 | Actr1a1      | ATPase, Na+/K+ transporting, alpha 1 polypeptide           | ENSMUSG000000033161 |
| P63017 | Hspa8       | 211626 | Tubgcp2      | tubulin, gamma complex associated protein 2                | ENSMUSG000000025474 |
| P63017 | Hspa8       | 201853 | Tubgcp4      | tubulin, gamma complex associated protein 4                | ENSMUSG000000027263 |
| P63017 | Hspa8       | 186141 | Ampd2        | adenosine monophosphate deaminase 2                        | ENSMUSG000000027889 |
| P63017 | Hspa8       | 200373 | Myo1c        | myosin 1C                                                  | ENSMUSG000000017774 |
| P63017 | Hspa8       | 153380 | Actn1        | actinin, alpha 1                                           | ENSMUSG000000015143 |
| P63017 | Hspa8       | 165033 | Actn4        | actinin alpha 4                                            | ENSMUSG000000054808 |
| P63017 | Hspa8       | 185482 | Hsp90ab1     | heat shock protein 90 alpha (cytosolic), class B member 1  | ENSMUSG000000023944 |
| P63017 | Hspa8       | 214779 | Actq1        | actin, gamma, cytoplasmic 1                                | ENSMUSG000000062825 |
| P63017 | Hspa8       | 184312 | Sult2b1      | sulfotransferase family, cytosolic, 2B, member 1           | ENSMUSG00000003271  |
| P63017 | Hspa8       | 1609   | SOD1         | superoxide dismutase 1, soluble                            | ENSG00000142168     |
| P63017 | Hspa8       | 150618 | Hspa2        | heat shock protein 2                                       | ENSMUSG000000059970 |
| P63017 | Hspa8       | 174662 | Sod1         | superoxide dismutase 1, soluble                            | ENSMUSG000000022982 |
| P63017 | Hspa8       | 129974 | Ccs          | copper chaperone for superoxide dismutase                  | ENSMUSG000000034108 |
| P63017 | Hspa8       | 606687 | Hspa1b       | heat shock protein 1B                                      | ENSMUSG000000090877 |
| P63017 | Hspa8       | 209442 | Hsph1        | heat shock 105kDa/110kDa protein 1                         | ENSMUSG000000029657 |
| P63017 | Hspa8       | 171290 | Hspa4        | heat shock protein 4                                       | ENSMUSG000000020361 |
| P63017 | Hspa8       | 136348 | Dnaja1       | DnaJ (Hsp40) homolog, subfamily A, member 1                | ENSMUSG000000028410 |
| P63017 | Hspa8       | 156729 | Tlr4         | toll-like receptor 4                                       | ENSMUSG000000039005 |
| P63017 | Hspa8       | 153401 | Stub1        | STIP1 homology and U-Box containing protein 1              | ENSMUSG000000039615 |
| P63017 | Hspa8       | 204565 | Myd88        | myeloid differentiation primary response gene 88           | ENSMUSG000000023508 |
| P63017 | Hspa8       | 154747 | Irak1        | interleukin-1 receptor-associated kinase 1                 | ENSMUSG000000031392 |
| P63017 | Hspa8       | 191912 | Ticam1       | toll-like receptor adaptor molecule 1                      | ENSMUSG000000047123 |
| P63017 | Hspa8       | 192882 | Tbk1         | TANK-binding kinase 1                                      | ENSMUSG000000020115 |
| P63017 | Hspa8       | 193222 | Traf6        | TNF receptor-associated factor 6                           | ENSMUSG000000027164 |
| P63017 | Hspa8       | 207513 | Prkcz        | protein kinase C, zeta                                     | ENSMUSG000000029053 |
| P63017 | Hspa8       | 211273 | Src          | Rous sarcoma oncogene                                      | ENSMUSG000000027646 |
| P63017 | Hspa8       | 195818 | Tlr9         | toll-like receptor 9                                       | ENSMUSG000000045322 |
| P63017 | Hspa8       | 207842 | Snap25       | synaptosomal-associated protein 25                         | ENSMUSG000000027273 |
| P63017 | Hspa8       | 214134 | Dnajc5       | DnaJ (Hsp40) homolog, subfamily C, member 5                | ENSMUSG00000000826  |
| P63017 | Hspa8       | 176755 | Sqta         | small glutamine-rich tetratricopeptide repeat (TPR)-contai | ENSMUSG00000004937  |
| P63017 | Hspa8       | 201307 | Ubc          | ubiquitin C                                                | ENSMUSG00000008348  |
| P63017 | Hspa8       | 198115 | Rnf2         | ring finger protein 2                                      | ENSMUSG000000026484 |
| P63017 | Hspa8       | 179250 | Erq          | avian erythroblastosis virus E-26 (v-ets) oncogene related | ENSMUSG000000040732 |
| P63017 | Hspa8       | 198910 | Kdm2b        | lysine (K)-specific demethylase 2B                         | ENSMUSG000000029475 |
| P63017 | Hspa8       | 213115 | Maip         | microtubule-associated protein tau                         | ENSMUSG000000018411 |
| P63017 | Hspa8       | 200597 | Ywhae        | tyrosine 3-monooxygenase/tryptophan 5-monooxygenase        | ENSMUSG000000020849 |
| P63017 | Hspa8       | 204151 | Hspb1        | heat shock protein 1                                       | ENSMUSG00000004951  |
| P63017 | Hspa8       | 198038 | Tctn1        | tectonic family member 1                                   | ENSMUSG000000038593 |
| P63017 | Hspa8       | 136801 | Ahi1         | Abelson helper integration site 1                          | ENSMUSG000000019986 |
| P63017 | Hspa8       | 181938 | Tuba1b       | tubulin, alpha 1B                                          | ENSMUSG000000023004 |
| P63017 | Hspa8       | 211364 | Jup          | junction plakoglobin                                       | ENSMUSG00000001552  |
| P63017 | Hspa8       | 172055 | Hsp90aa1     | heat shock protein 90, alpha (cytosolic), class A member   | ENSMUSG000000021270 |
| P63017 | Hspa8       | 146462 | Invs         | inversin                                                   | ENSMUSG000000028344 |
| P63017 | Hspa8       | 136511 | Hspa9        | heat shock protein 9                                       | ENSMUSG000000024359 |
| P63017 | Hspa8       | 179144 | Tubb5        | tubulin, beta 5                                            | ENSMUSG000000001525 |
| P63017 | Hspa8       | 207771 | Mks1         | Meckel syndrome, type 1                                    | ENSMUSG000000034121 |
| P63017 | Hspa8       | 160972 | Cc2d2a       | coiled-coil and C2 domain containing 2A                    | ENSMUSG000000039765 |
| P63017 | Hspa8       | 149554 | Fhl2         | four and a half LIM domains 2                              | ENSMUSG000000008136 |
| P63017 | Hspa8       | 202264 | Nek8         | NIMA (never in mitosis gene a)-related expressed kinase    | ENSMUSG000000017405 |
| P63017 | Hspa8       | 158489 | Iqcb1        | IQ calmodulin-binding motif containing 1                   | ENSMUSG000000022837 |
| P63017 | Hspa8       | 194604 | Nphp3        | nephronophthisis 3 (adolescent)                            | ENSMUSG000000032558 |
| P63017 | Hspa8       | 139839 | 2210010C04Ri | RIKEN cDNA 2210010C04 gene                                 | ENSMUSG000000029882 |
| P63017 | Hspa8       | 164680 | Ogt          | O-linked N-acetylglucosamine (GlcNAc) transferase (UDP-    | ENSMUSG000000034160 |
| P63017 | Hspa8       | 140225 | Try5         | trypsin 5                                                  | ENSMUSG000000036938 |
| P63017 | Hspa8       | 606538 | Gm2663       | predicted gene 2663                                        | ENSMUSG000000090480 |
| P63017 | Hspa8       | 140358 | Try10        | trypsin 10                                                 | ENSMUSG000000071521 |
| P63038 | Hspd1       | 15945  | OGG1         | 8-oxoguanine DNA glycosylase                               | ENSG00000114026     |
| P63038 | Hspd1       | 173221 | Mcl1         | myeloid cell leukemia sequence 1                           | ENSMUSG000000038612 |
| P63038 | Hspd1       | 178542 | Prdx1        | peroxiredoxin 1                                            | ENSMUSG000000028691 |
| P63038 | Hspd1       | 138913 | Crkl         | v-crk sarcoma virus CT10 oncogene homolog (avian)-like     | ENSMUSG000000006134 |
| P63038 | Hspd1       | 200552 | Nckipso      | NCK interacting protein with SH3 domain                    | ENSMUSG000000032598 |
| Q811T9 | IDBG-248652 | 51663  | GSK3B        | glycogen synthase kinase 3 beta                            | ENSG000000082701    |
| Q811T9 | IDBG-248652 | 7404   | AXIN1        | axin 1                                                     | ENSG00000103126     |
| Q811T9 | IDBG-248652 | 27347  | CTNNB1       | catenin (cadherin-associated protein), beta 1, 88kDa       | ENSG00000168036     |
| Q811T9 | IDBG-248652 | 159859 | Gsk3b        | glycogen synthase kinase 3 beta                            | ENSMUSG00000002812  |
| P42227 | IDBG-null   | 154747 | Irak1        | interleukin-1 receptor-associated kinase 1                 | ENSMUSG000000031392 |
| P42227 | IDBG-null   | 209781 | Mapk3        | mitogen-activated protein kinase 3                         | ENSMUSG000000063065 |
| P42227 | IDBG-null   | 177264 | Dapk3        | death-associated protein kinase 3                          | ENSMUSG000000034974 |
| P42227 | IDBG-null   | 211273 | Src          | Rous sarcoma oncogene                                      | ENSMUSG000000027646 |
| P42227 | IDBG-null   | 26804  | ICAM1        | intercellular adhesion molecule 1                          | ENSG00000090339     |
| P42227 | IDBG-null   | 214063 | Stmn3        | stathmin-like 3                                            | ENSMUSG000000027581 |
| P42227 | IDBG-null   | 193173 | Hnf1a        | HNF1 homeobox A                                            | ENSMUSG000000029556 |
| P42227 | IDBG-null   | 158538 | Fos          | FBJ osteosarcoma oncogene                                  | ENSMUSG000000021250 |
| P42227 | IDBG-null   | 164161 | Jun          | Jun oncogene                                               | ENSMUSG000000052684 |

|        |           |        |               |                                                                           |                     |
|--------|-----------|--------|---------------|---------------------------------------------------------------------------|---------------------|
| P42227 | IDBG-null | 213090 | Cebpb         | CCAAT/enhancer binding protein (C/EBP), beta                              | ENSMUSG00000056501  |
| P42227 | IDBG-null | 64463  | HCK           | hemopoietic cell kinase                                                   | ENSG00000101336     |
| P42227 | IDBG-null | 74081  | SRC           | v-src sarcoma (Schmidt-Ruppin A-2) viral oncogene homolog                 | ENSG00000197122     |
| P42227 | IDBG-null | 95463  | FYN           | FYN oncogene related to SRC, FGR, YES                                     | ENSG00000010810     |
| P42227 | IDBG-null | 94937  | FGR           | Gardner-Rasheed feline sarcoma viral (v-fgr) oncogene homolog             | ENSG00000000938     |
| P42227 | IDBG-null | 201164 | Prkce         | protein kinase C, epsilon                                                 | ENSMUSG00000045038  |
| P42227 | IDBG-null | 131732 | Elp2          | elongation protein 2 homolog (S. cerevisiae)                              | ENSMUSG00000024271  |
| P42227 | IDBG-null | 214604 | Socs3         | suppressor of cytokine signaling 3                                        | ENSMUSG00000053113  |
| P42227 | IDBG-null | 187635 | Ptpn6         | protein tyrosine phosphatase, non-receptor type 6                         | ENSMUSG00000004266  |
| P42227 | IDBG-null | 171427 | Btk           | Bruton agammaglobulinemia tyrosine kinase                                 | ENSMUSG00000031264  |
| P42227 | IDBG-null | 153162 | Stat1         | signal transducer and activator of transcription 1                        | ENSMUSG00000026104  |
| P42227 | IDBG-null | 31569  | GADD45GIP1    | growth arrest and DNA-damage-inducible, gamma interacting protein 1       | ENSG00000179271     |
| P42227 | IDBG-null | 37954  | JUND          | jun D proto-oncogene                                                      | ENSG00000130522     |
| P42227 | IDBG-null | 95078  | RPA2          | replication protein A2, 32kDa                                             | ENSG00000117748     |
| P42227 | IDBG-null | 127871 | Ghr           | growth hormone receptor                                                   | ENSMUSG000000055737 |
| P42227 | IDBG-null | 159458 | IL10ra        | interleukin 10 receptor, alpha                                            | ENSMUSG00000032089  |
| P42227 | IDBG-null | 62183  | MAPK9         | mitogen-activated protein kinase 9                                        | ENSG00000050748     |
| P42227 | IDBG-null | 156977 | Jak2          | Janus kinase 2                                                            | ENSMUSG00000024789  |
| P42227 | IDBG-null | 30976  | JUNB          | jun B proto-oncogene                                                      | ENSG00000171223     |
| P42227 | IDBG-null | 94374  | MAP3K7        | mitogen-activated protein kinase kinase kinase 7                          | ENSG00000135341     |
| P42227 | IDBG-null | 21516  | IL6ST         | interleukin 6 signal transducer (gp130, oncostatin M receptor)            | ENSG00000134352     |
| P42227 | IDBG-null | 165357 | Hax1          | HCLS1 associated X-1                                                      | ENSMUSG00000027944  |
| P42227 | IDBG-null | 187040 | Krt1          | keratin 1                                                                 | ENSMUSG00000046834  |
| P42227 | IDBG-null | 188573 | Mlf2          | myeloid leukemia factor 2                                                 | ENSMUSG00000030120  |
| P42227 | IDBG-null | 179321 | Huwe1         | HECT, UBA and WWE domain containing 1                                     | ENSMUSG00000025261  |
| P42227 | IDBG-null | 195709 | Bank1         | B-cell scaffold protein with ankyrin repeats 1                            | ENSMUSG00000037922  |
| P42227 | IDBG-null | 207728 | 6330503K22Rik | RIKEN cDNA 6330503K22 gene                                                | ENSMUSG00000033904  |
| P42227 | IDBG-null | 164070 | Cryab         | crystallin, alpha B                                                       | ENSMUSG00000032060  |
| P42227 | IDBG-null | 156635 | Gsk3a         | glycogen synthase kinase 3 alpha                                          | ENSMUSG00000057177  |
| P42227 | IDBG-null | 159859 | Gsk3b         | glycogen synthase kinase 3 beta                                           | ENSMUSG00000022812  |
| P42227 | IDBG-null | 135936 | Ifnqr1        | interferon gamma receptor 1                                               | ENSMUSG00000020009  |
| P42227 | IDBG-null | 99558  | IL23R         | interleukin 23 receptor                                                   | ENSG00000162594     |
| P42227 | IDBG-null | 167001 | Gzmb          | granzyme B                                                                | ENSMUSG00000015437  |
| P42227 | IDBG-null | 132856 | Arid1b        | AT rich interactive domain 1B (SWI-like)                                  | ENSMUSG00000069729  |
| P42227 | IDBG-null | 204151 | Hspb1         | heat shock protein 1                                                      | ENSMUSG00000004951  |
| P42227 | IDBG-null | 132413 | Sipa1         | signal-induced proliferation associated gene 1                            | ENSMUSG00000056917  |
| P42227 | IDBG-null | 149806 | Mrps34        | mitochondrial ribosomal protein S34                                       | ENSMUSG00000038880  |
| P42227 | IDBG-null | 172251 | Irf1          | interferon regulatory factor 1                                            | ENSMUSG00000018899  |
| P42227 | IDBG-null | 158392 | Chd8          | chromodomain helicase DNA binding protein 8                               | ENSMUSG00000053754  |
| P42227 | IDBG-null | 131711 | Tspan7        | tetraspanin 7                                                             | ENSMUSG00000058254  |
| P42227 | IDBG-null | 174121 | Uqcrl1        | ubiquinol-cytochrome c reductase, complex III subunit XI                  | ENSMUSG00000020163  |
| P42227 | IDBG-null | 128466 | Sdc1          | syndecan 1                                                                | ENSMUSG00000020592  |
| P42227 | IDBG-null | 152923 | Nfil3         | nuclear factor, interleukin 3, regulated                                  | ENSMUSG00000056749  |
| P42227 | IDBG-null | 176557 | Gadd45b       | growth arrest and DNA-damage-inducible 45 beta                            | ENSMUSG00000015312  |
| P42227 | IDBG-null | 209275 | Il4ra         | interleukin 4 receptor, alpha                                             | ENSMUSG00000030748  |
| P42227 | IDBG-null | 202346 | Selp          | selectin, platelet                                                        | ENSMUSG00000026580  |
| P42227 | IDBG-null | 167138 | Flt4          | FMS-like tyrosine kinase 4                                                | ENSMUSG00000020357  |
| P42227 | IDBG-null | 127850 | Pomc          | pro-opiomelanocortin-alpha                                                | ENSMUSG00000020660  |
| P42227 | IDBG-null | 197036 | Stat2         | signal transducer and activator of transcription 2                        | ENSMUSG00000040033  |
| P42227 | IDBG-null | 172393 | Scp2          | sterol carrier protein 2, liver                                           | ENSMUSG00000028603  |
| P42227 | IDBG-null | 175664 | Junb          | Jun-B oncogene                                                            | ENSMUSG00000052837  |
| P42227 | IDBG-null | 86738  | STMN3         | stathmin-like 3                                                           | ENSG00000197457     |
| P42227 | IDBG-null | 52534  | KPNA1         | karyopherin alpha 1 (importin alpha 5)                                    | ENSG00000114030     |
| P42227 | IDBG-null | 157578 | Rbfox2        | RNA binding protein, fox-1 homolog (C. elegans) 2                         | ENSMUSG00000033565  |
| P42227 | IDBG-null | 22529  | INSR          | insulin receptor                                                          | ENSG00000171105     |
| P42227 | IDBG-null | 166211 | Gnb2l1        | guanine nucleotide binding protein (G protein), beta polypeptide 2-like 1 | ENSMUSG00000020372  |
| P42227 | IDBG-null | 73479  | MAPK8         | mitogen-activated protein kinase 8                                        | ENSG00000107643     |
| P42227 | IDBG-null | 173696 | Cebpg         | CCAAT/enhancer binding protein (C/EBP), gamma                             | ENSMUSG00000056216  |
| P42227 | IDBG-null | 188607 | Sp1           | trans-acting transcription factor 1                                       | ENSMUSG00000001280  |
| P42227 | IDBG-null | 127933 | Ncoa1         | nuclear receptor coactivator 1                                            | ENSMUSG00000020647  |
| P42227 | IDBG-null | 181579 | Hdac4         | histone deacetylase 4                                                     | ENSMUSG00000026313  |
| P42227 | IDBG-null | 162156 | Boc           | biregional cell adhesion molecule-related/down-regulated                  | ENSMUSG00000022687  |
| P42227 | IDBG-null | 208918 | Pax1          | paired box gene 1                                                         | ENSMUSG00000037034  |
| P42227 | IDBG-null | 158171 | Spnb2         | spectrin beta 2                                                           | ENSMUSG00000020315  |
| P42227 | IDBG-null | 128153 | Ighmbp2       | immunoglobulin mu binding protein 2                                       | ENSMUSG00000024831  |
| P42227 | IDBG-null | 154862 | Cadm4         | cell adhesion molecule 4                                                  | ENSMUSG00000054793  |
| P42227 | IDBG-null | 174766 | Itga11        | integrin alpha 11                                                         | ENSMUSG00000032243  |
| P42227 | IDBG-null | 146570 | Srfbp1        | serum response factor binding protein 1                                   | ENSMUSG00000024528  |
| P42227 | IDBG-null | 173713 | Cebpa         | CCAAT/enhancer binding protein (C/EBP), alpha                             | ENSMUSG00000034957  |
| P42227 | IDBG-null | 197156 | IL28ra        | interleukin 28 receptor alpha                                             | ENSMUSG00000062157  |
| P42227 | IDBG-null | 144967 | Smad9         | MAD homolog 9 (Drosophila)                                                | ENSMUSG00000027796  |
| P42227 | IDBG-null | 196115 | Pdik1l        | PDLIM1 interacting kinase 1 like                                          | ENSMUSG00000050890  |
| P42227 | IDBG-null | 143920 | Paxip1        | PAX interacting (with transcription-activation domain) protein 1          | ENSMUSG00000002221  |
| P42227 | IDBG-null | 166939 | N4bp2         | NEDD4 binding protein 2                                                   | ENSMUSG00000037795  |
| P42227 | IDBG-null | 145636 | Sema3g        | sema domain, immunoglobulin domain (Ig), short basic domain               | ENSMUSG00000021904  |
| P42227 | IDBG-null | 130102 | Asap2         | ArfGAP with SH3 domain, ankyrin repeat and PH domain                      | ENSMUSG00000052632  |
| P42227 | IDBG-null | 134125 | Ect2          | ect2 oncogene                                                             | ENSMUSG00000027699  |
| P42227 | IDBG-null | 162567 | Angptl2       | angiopoietin-like 2                                                       | ENSMUSG00000004105  |
| P42227 | IDBG-null | 158314 | Ctnna2        | catenin (cadherin associated protein), alpha 2                            | ENSMUSG00000063063  |
| P42227 | IDBG-null | 130301 | Porcn         | porcupine homolog (Drosophila)                                            | ENSMUSG00000031169  |
| P42227 | IDBG-null | 142063 | Vmn2r42       | vomer nasal 2, receptor 42                                                | ENSMUSG00000070844  |
| P42227 | IDBG-null | 205027 | Giyyf1        | GRB10 interacting GYF protein 1                                           | ENSMUSG00000029714  |
| P42227 | IDBG-null | 174956 | Cln6          | ceroid-lipofuscinosis, neuronal 6                                         | ENSMUSG00000032245  |
| P42227 | IDBG-null | 144400 | Baq4          | BCL2-associated athanogene 4                                              | ENSMUSG00000037316  |
| P42227 | IDBG-null | 137812 | Angpt1        | angiopoietin 1                                                            | ENSMUSG00000022309  |
| P42227 | IDBG-null | 186798 | Dzip1         | DAZ interacting protein 1                                                 | ENSMUSG00000042156  |
| P42227 | IDBG-null | 171820 | Notch4        | Notch gene homolog 4 (Drosophila)                                         | ENSMUSG00000015468  |
| P42227 | IDBG-null | 194803 | Nav1          | neuron navigator 1                                                        | ENSMUSG00000009418  |
| P42227 | IDBG-null | 154830 | Cbwd1         | COBW domain containing 1                                                  | ENSMUSG00000024878  |

|        |           |        |               |                                                                           |                     |
|--------|-----------|--------|---------------|---------------------------------------------------------------------------|---------------------|
| P42227 | IDBG-null | 129513 | Crebbp        | CREB binding protein                                                      | ENSMUSG00000022521  |
| P42227 | IDBG-null | 190212 | Gabra5        | gamma-aminobutyric acid (GABA) A receptor, subunit alpha 5                | ENSMUSG00000055078  |
| P42227 | IDBG-null | 189844 | Tnfrsf1a      | tumor necrosis factor receptor superfamily, member 1a                     | ENSMUSG00000030341  |
| P42227 | IDBG-null | 164991 | Pcnt          | pericentrin (kendrin)                                                     | ENSMUSG00000001151  |
| P42227 | IDBG-null | 152576 | Bcl3          | B-cell leukemia/lymphoma 3                                                | ENSMUSG000000053175 |
| P42227 | IDBG-null | 197289 | Gbp1          | guanylate binding protein 1                                               | ENSMUSG00000028269  |
| P42227 | IDBG-null | 137821 | Fgl2          | fibrinogen-like protein 2                                                 | ENSMUSG00000039899  |
| P42227 | IDBG-null | 148540 | Cdon          | cell adhesion molecule-related/down-regulated by oncogene 1               | ENSMUSG000000038119 |
| P42227 | IDBG-null | 133057 | Ltbp3         | latent transforming growth factor beta binding protein 3                  | ENSMUSG00000024940  |
| P42227 | IDBG-null | 163684 | Tek           | endothelial-specific receptor tyrosine kinase                             | ENSMUSG00000006386  |
| P42227 | IDBG-null | 26087  | PIN1          | peptidylprolyl cis/trans isomerase, NIMA-interacting 1                    | ENSG00000127445     |
| P42227 | IDBG-null | 8992   | EP300         | E1A binding protein p300                                                  | ENSG00000100393     |
| P42227 | IDBG-null | 166648 | Jak3          | Janus kinase 3                                                            | ENSMUSG00000031805  |
| P42227 | IDBG-null | 176105 | Pias3         | protein inhibitor of activated STAT 3                                     | ENSMUSG00000028101  |
| P42227 | IDBG-null | 203203 | Nos2          | nitric oxide synthase 2, inducible                                        | ENSMUSG00000020826  |
| P42227 | IDBG-null | 151280 | Slc40a1       | solute carrier family 40 (iron-regulated transporter), member 1           | ENSMUSG00000025993  |
| P42227 | IDBG-null | 144556 | Myc           | myelocytomatosis oncogene                                                 | ENSMUSG00000022346  |
| P42227 | IDBG-null | 50702  | STAT3         | signal transducer and activator of transcription 3 (acute-phase reactant) | ENSG00000168610     |
| P42227 | IDBG-null | 97020  | IFNGR1        | interferon gamma receptor 1                                               | ENSG00000027697     |
| P42227 | IDBG-null | 169968 | Rorc          | RAR-related orphan receptor gamma                                         | ENSMUSG00000028150  |
| P42227 | IDBG-null | 136575 | Il17a         | interleukin 17A                                                           | ENSMUSG00000025929  |
| P42227 | IDBG-null | 171764 | Ldb1          | LIM domain binding 1                                                      | ENSMUSG00000025223  |
| P42227 | IDBG-null | 175763 | Tal1          | T-cell acute lymphocytic leukemia 1                                       | ENSMUSG00000028717  |
| P42227 | IDBG-null | 166776 | Gata2         | GATA binding protein 2                                                    | ENSMUSG00000015053  |
| P42227 | IDBG-null | 136612 | Il17f         | interleukin 17F                                                           | ENSMUSG000000041872 |
| P42227 | IDBG-null | 408826 | LYN           | v-yes-1 Yamaguchi sarcoma viral related oncogene homolog                  | ENSG00000254087     |
| P42227 | IDBG-null | 133094 | Steap4        | STEAP family member 4                                                     | ENSMUSG00000012428  |
| P42227 | IDBG-null | 197102 | Rgs2          | regulator of G-protein signaling 2                                        | ENSMUSG00000026360  |
| P42227 | IDBG-null | 164861 | Pcbp1         | poly(rC) binding protein 1                                                | ENSMUSG00000051695  |
| P42227 | IDBG-null | 184853 | Pou6f1        | POU domain, class 6, transcription factor 1                               | ENSMUSG00000009739  |
| P42227 | IDBG-null | 144418 | Zfp467        | zinc finger protein 467                                                   | ENSMUSG00000068551  |
| P42227 | IDBG-null | 184340 | Isl1          | ISL1 transcription factor, LIM/homeodomain                                | ENSMUSG00000042258  |
| P42227 | IDBG-null | 194638 | Fer           | fer (fms/fps related) protein kinase                                      | ENSMUSG00000000127  |
| P42227 | IDBG-null | 167366 | Jak1          | Janus kinase 1                                                            | ENSMUSG00000028530  |
| P42227 | IDBG-null | 142854 | Prkcd         | protein kinase C, delta                                                   | ENSMUSG000000021948 |
| P42227 | IDBG-null | 160997 | Ndufa13       | NADH dehydrogenase (ubiquinone) 1 alpha subcomplex, subunit 13            | ENSMUSG00000036199  |
| P42227 | IDBG-null | 148620 | Hif1a         | hypoxia inducible factor 1, alpha subunit                                 | ENSMUSG00000021109  |
| P31750 | IDBG-null | 156458 | Ikbkg         | inhibitor of kappaB kinase gamma                                          | ENSMUSG00000004221  |
| P31750 | IDBG-null | 169132 | Chuk          | conserved helix-loop-helix ubiquitous kinase                              | ENSMUSG00000025199  |
| P31750 | IDBG-null | 85142  | XIAP          | X-linked inhibitor of apoptosis                                           | ENSG00000101966     |
| P31750 | IDBG-null | 63691  | AKT1S1        | AKT1 substrate 1 (proline-rich)                                           | ENSG00000204673     |
| P31750 | IDBG-null | 196288 | Pde3a         | phosphodiesterase 3A, cGMP inhibited                                      | ENSMUSG00000041741  |
| P31750 | IDBG-null | 160992 | Lmna          | lamin A                                                                   | ENSMUSG00000028063  |
| P31750 | IDBG-null | 172131 | Wdfy2         | WD repeat and FYVE domain containing 2                                    | ENSMUSG00000014547  |
| P31750 | IDBG-null | 143370 | Foxo1         | forkhead box O1                                                           | ENSMUSG000000044167 |
| P31750 | IDBG-null | 262062 | Gm3272        | predicted pseudogene 3272                                                 | ENSMUSG00000078967  |
| P31750 | IDBG-null | 209676 | Trib3         | tribbles homolog 3 (Drosophila)                                           | ENSMUSG00000032715  |
| P31750 | IDBG-null | 130873 | Ppl           | periplakin                                                                | ENSMUSG00000039457  |
| P31750 | IDBG-null | 207079 | Btbtd10       | BTB (POZ) domain containing 10                                            | ENSMUSG00000038187  |
| P31750 | IDBG-null | 18937  | TCL1A         | T-cell leukemia/lymphoma 1A                                               | ENSG00000100721     |
| P31750 | IDBG-null | 4327   | PHLPP1        | PH domain and leucine rich repeat protein phosphatase 1                   | ENSG00000081913     |
| P31750 | IDBG-null | 157020 | Ccdc88a       | coiled coil domain containing 88A                                         | ENSMUSG00000032740  |
| P31750 | IDBG-null | 189541 | Pawr          | PRKC, apoptosis, WT1, regulator                                           | ENSMUSG00000035873  |
| P31750 | IDBG-null | 175693 | Smad3         | MAD homolog 3 (Drosophila)                                                | ENSMUSG00000032402  |
| P31750 | IDBG-null | 46196  | CLIP3         | CAP-GLY domain containing linker protein 3                                | ENSG00000105270     |
| P31750 | IDBG-null | 207513 | Prkcz         | protein kinase C, zeta                                                    | ENSMUSG00000029053  |
| P31750 | IDBG-null | 80957  | PTPN1         | protein tyrosine phosphatase, non-receptor type 1                         | ENSG00000196396     |
| P31750 | IDBG-null | 172055 | Hsp90aa1      | heat shock protein 90, alpha (cytosolic), class A member 1                | ENSMUSG00000021270  |
| P31750 | IDBG-null | 163320 | 2810422J05Rik | RIKEN cDNA 2810422J05 gene                                                | ENSMUSG00000055553  |
| P31750 | IDBG-null | 162945 | Mapkap1       | mitogen-activated protein kinase associated protein 1                     | ENSMUSG00000038696  |
| P31750 | IDBG-null | 128168 | Rictor        | RPTOR independent companion of MTOR, complex 2                            | ENSMUSG00000050310  |
| P31750 | IDBG-null | 204403 | Mtor          | mechanistic target of rapamycin (serine/threonine kinase)                 | ENSMUSG00000028991  |
| P31750 | IDBG-null | 77184  | STK4          | serine/threonine kinase 4                                                 | ENSG00000101109     |
| P31750 | IDBG-null | 153162 | Stat1         | signal transducer and activator of transcription 1                        | ENSMUSG00000026104  |
| P31750 | IDBG-null | 141021 | Ikbkb         | inhibitor of kappaB kinase beta                                           | ENSMUSG000000031537 |
| P31750 | IDBG-null | 25713  | MYD88         | myeloid differentiation primary response gene (88)                        | ENSG00000127936     |
| P31750 | IDBG-null | 168541 | Clip3         | CAP-GLY domain containing linker protein 3                                | ENSMUSG00000013921  |
| P31750 | IDBG-null | 20317  | CDKN1B        | cyclin-dependent kinase inhibitor 1B (p27, Kip1)                          | ENSG00000111276     |
| P31750 | IDBG-null | 136255 | Map3k5        | mitogen-activated protein kinase kinase kinase 5                          | ENSMUSG00000071369  |
| P31750 | IDBG-null | 192882 | Tbk1          | TANK-binding kinase 1                                                     | ENSMUSG00000020115  |
| P31750 | IDBG-null | 153401 | Stub1         | STIP1 homology and U-Box containing protein 1                             | ENSMUSG00000039615  |
| P31750 | IDBG-null | 19263  | ARRB2         | arrestin, beta 2                                                          | ENSG00000141480     |
| P31750 | IDBG-null | 143462 | Ppp2r2b       | protein phosphatase 2 (formerly 2A), regulatory subunit B                 | ENSMUSG00000024500  |
| P31750 | IDBG-null | 159859 | Gsk3b         | glycogen synthase kinase 3 beta                                           | ENSMUSG00000022812  |
| P31750 | IDBG-null | 64687  | ARRB1         | arrestin, beta 1                                                          | ENSG00000137486     |
| P31750 | IDBG-null | 178662 | Ttc3          | tetratricopeptide repeat domain 3                                         | ENSMUSG00000040785  |
| P31750 | IDBG-null | 64029  | UBC           | ubiquitin C                                                               | ENSG00000150991     |
| P31750 | IDBG-null | 15903  | CALM1         | calmodulin 1 (phosphorylase kinase, delta)                                | ENSG00000198688     |
| P31750 | IDBG-null | 185482 | Hsp90ab1      | heat shock protein 90 alpha (cytosolic), class B member 1                 | ENSMUSG00000023944  |
| P31750 | IDBG-null | 191852 | Mdm2          | transformed mouse 3T3 cell double minute 2                                | ENSMUSG00000020184  |
| P31750 | IDBG-null | 79989  | PREX1         | phosphatidylinositol-3,4,5-trisphosphate-dependent Rac exchange factor 1  | ENSG00000124126     |
| P31750 | IDBG-null | 17688  | RICTOR        | RPTOR independent companion of MTOR, complex 2                            | ENSG00000164327     |
| P31750 | IDBG-null | 159441 | Sirt1         | sirtuin 1 (silent mating type information regulation 2, homolog 1)        | ENSMUSG00000020063  |
| P70347 | IDBG-null | 44993  | TBK1          | TANK-binding kinase 1                                                     | ENSG00000183735     |
| P70347 | IDBG-null | 146254 | Traf2         | TNF receptor-associated factor 2                                          | ENSMUSG00000026942  |
| P70347 | IDBG-null | 192882 | Tbk1          | TANK-binding kinase 1                                                     | ENSMUSG00000020115  |
| P70347 | IDBG-null | 207066 | Mavs          | mitochondrial antiviral signaling protein                                 | ENSMUSG00000037523  |
| P70347 | IDBG-null | 172558 | Traf3         | TNF receptor-associated factor 3                                          | ENSMUSG00000021277  |
| P70347 | IDBG-null | 191912 | Ticam1        | toll-like receptor adaptor molecule 1                                     | ENSMUSG00000047123  |

|        |           |        |              |                                                                               |                      |
|--------|-----------|--------|--------------|-------------------------------------------------------------------------------|----------------------|
| P70347 | IDBG-null | 210156 | Tbkbp1       | TBK1 binding protein 1                                                        | ENSMUSG000000038517  |
| P70347 | IDBG-null | 133079 | Ddx3x        | DEAD/H (Asp-Glu-Ala-Asp/His) box polypeptide 3, X-link                        | ENSMUSG00000000787   |
| P70347 | IDBG-null | 163730 | Traf1        | TNF receptor-associated factor 1                                              | ENSMUSG000000026875  |
| P70347 | IDBG-null | 144865 | Map4k5       | mitogen-activated protein kinase kinase kinase 5                              | ENSMUSG000000034761  |
| P70347 | IDBG-null | 21240  | TRAF3        | TNF receptor-associated factor 3                                              | ENSG00000131323      |
| P70347 | IDBG-null | 106228 | IKBKE        | inhibitor of kappa light polypeptide gene enhancer in B-cel                   | ENSG00000143466      |
| P70347 | IDBG-null | 181123 | Irf3         | interferon regulatory factor 3                                                | ENSMUSG00000003184   |
| P70347 | IDBG-null | 143710 | Ripk1        | receptor (TNFRSF)-interacting serine-threonine kinase 1                       | ENSMUSG000000021408  |
| P70347 | IDBG-null | 135957 | Ddx58        | DEAD (Asp-Glu-Ala-Asp) box polypeptide 58                                     | ENSMUSG000000040296  |
| P70347 | IDBG-null | 156458 | Ikbkg        | inhibitor of kappaB kinase gamma                                              | ENSMUSG00000004221   |
| P70347 | IDBG-null | 157464 | Casp8        | caspase 8                                                                     | ENSMUSG000000026029  |
| P70347 | IDBG-null | 169132 | Chuk         | conserved helix-loop-helix ubiquitous kinase                                  | ENSMUSG000000025199  |
| P70347 | IDBG-null | 141021 | Ikbkb        | inhibitor of kappaB kinase beta                                               | ENSMUSG000000031537  |
| P70347 | IDBG-null | 190983 | Ikbke        | inhibitor of kappaB kinase epsilon                                            | ENSMUSG000000042349  |
| P70347 | IDBG-null | 92817  | TRAF2        | TNF receptor-associated factor 2                                              | ENSG00000127191      |
| P39053 | IDBG-null | 212321 | Ap2a2        | adaptor protein complex AP-2, alpha 2 subunit                                 | ENSMUSG00000002957   |
| P39053 | IDBG-null | 176668 | Its1         | intersectin 1 (SH3 domain protein 1A)                                         | ENSMUSG000000022957  |
| P39053 | IDBG-null | 135538 | Syn1         | synapsin 1                                                                    | ENSMUSG000000037217  |
| P39053 | IDBG-null | 162983 | Mtap2        | microtubule-associated protein 2                                              | ENSMUSG000000015222  |
| P39053 | IDBG-null | 150657 | Camk2a       | calcium/calmodulin-dependent protein kinase II alpha                          | ENSMUSG000000042617  |
| P39053 | IDBG-null | 146219 | Pfn2         | profilin 2                                                                    | ENSMUSG000000027805  |
| P39053 | IDBG-null | 194572 | Kif5a        | kinesin family member 5A                                                      | ENSMUSG000000074657  |
| P39053 | IDBG-null | 137748 | Kcnma1       | potassium large conductance calcium-activated channel, s                      | ENSMUSG000000063142  |
| P39053 | IDBG-null | 203389 | Stx1a        | syntaxin 1A (brain)                                                           | ENSMUSG000000007207  |
| P39053 | IDBG-null | 161623 | Stxbp1       | syntaxin binding protein 1                                                    | ENSMUSG000000026797  |
| P39053 | IDBG-null | 189759 | Vamp2        | vesicle-associated membrane protein 2                                         | ENSMUSG000000020894  |
| P39053 | IDBG-null | 129240 | Syp          | synaptophysin                                                                 | ENSMUSG000000031144  |
| P39053 | IDBG-null | 170932 | Atp4a        | ATPase, H <sup>+</sup> /K <sup>+</sup> exchanging, gastric, alpha polypeptide | ENSMUSG00000005553   |
| P39053 | IDBG-null | 179812 | Atp1a1       | ATPase, Na <sup>+</sup> /K <sup>+</sup> transporting, alpha 1 polypeptide     | ENSMUSG000000033161  |
| P39053 | IDBG-null | 156172 | Atp1a3       | ATPase, Na <sup>+</sup> /K <sup>+</sup> transporting, alpha 3 polypeptide     | ENSMUSG000000040907  |
| P39053 | IDBG-null | 205352 | Atp1a2       | ATPase, Na <sup>+</sup> /K <sup>+</sup> transporting, alpha 2 polypeptide     | ENSMUSG00000007097   |
| P39053 | IDBG-null | 147527 | Slc30a3      | solute carrier family 30 (zinc transporter), member 3                         | ENSMUSG000000029151  |
| P39053 | IDBG-null | 187917 | Atp6v0d1     | ATPase, H <sup>+</sup> transporting, lysosomal V0 subunit D1                  | ENSMUSG000000013160  |
| P39053 | IDBG-null | 181138 | Gnao1        | guanine nucleotide binding protein, alpha O                                   | ENSMUSG000000031748  |
| P39053 | IDBG-null | 207606 | Gnb1         | guanine nucleotide binding protein (G protein), beta 1                        | ENSMUSG000000029064  |
| P39053 | IDBG-null | 188200 | Gnb3         | guanine nucleotide binding protein (G protein), beta 3                        | ENSMUSG000000023439  |
| P39053 | IDBG-null | 209032 | Napb         | N-ethylmaleimide sensitive fusion protein attachment pro                      | ENSMUSG000000027438  |
| P39053 | IDBG-null | 210393 | Stx1b        | syntaxin 1B                                                                   | ENSMUSG000000030806  |
| P39053 | IDBG-null | 155754 | Gpm6a        | glycoprotein m6a                                                              | ENSMUSG000000031517  |
| P39053 | IDBG-null | 138466 | Stx7         | syntaxin 7                                                                    | ENSMUSG000000019998  |
| P39053 | IDBG-null | 154521 | Tnk2         | tyrosine kinase, non-receptor, 2                                              | ENSMUSG000000022791  |
| P39053 | IDBG-null | 130893 | Klc2         | kinesin light chain 2                                                         | ENSMUSG000000024862  |
| P39053 | IDBG-null | 186957 | Eef1a1       | eukaryotic translation elongation factor 1 alpha 1                            | ENSMUSG000000037742  |
| P39053 | IDBG-null | 168772 | Kif5c        | kinesin family member 5C                                                      | ENSMUSG000000026764  |
| P39053 | IDBG-null | 133375 | Tubgcp3      | tubulin, gamma complex associated protein 3                                   | ENSMUSG00000000759   |
| P39053 | IDBG-null | 173074 | Actr1a       | ARP1 actin-related protein 1 homolog A, cetractin alpha                       | ENSMUSG000000025228  |
| P39053 | IDBG-null | 153613 | Hspa8        | heat shock protein 8                                                          | ENSMUSG000000015656  |
| P39053 | IDBG-null | 211869 | Tubq1        | tubulin, gamma 1                                                              | ENSMUSG000000035198  |
| P39053 | IDBG-null | 191571 | Khdrbs1      | KH domain containing, RNA binding, signal transduction a                      | ENSMUSG000000028790  |
| P39053 | IDBG-null | 132410 | Pik3c3       | phosphoinositide-3-kinase, class 3                                            | ENSMUSG000000033628  |
| P39053 | IDBG-null | 186932 | A830010M20R1 | RIKEN cDNA A830010M20 gene                                                    | ENSMUSG000000044060  |
| P39053 | IDBG-null | 144990 | Actr1b       | ARP1 actin-related protein 1 homolog B, cetractin beta (                      | ENSMUSG000000037351  |
| P39053 | IDBG-null | 195461 | Pik3r4       | phosphatidylinositol 3 kinase, regulatory subunit, polypep                    | ENSMUSG000000032571  |
| P39053 | IDBG-null | 211626 | Tubgcp2      | tubulin, gamma complex associated protein 2                                   | ENSMUSG000000025474  |
| P39053 | IDBG-null | 201853 | Tubgcp4      | tubulin, gamma complex associated protein 4                                   | ENSMUSG000000027263  |
| P39053 | IDBG-null | 186141 | Ampd2        | adenosine monophosphate deaminase 2                                           | ENSMUSG000000027889  |
| P39053 | IDBG-null | 207842 | Snap25       | synaptosomal-associated protein 25                                            | ENSMUSG000000027273  |
| P39053 | IDBG-null | 207019 | Cltc         | clathrin, heavy polypeptide (Hc)                                              | ENSMUSG000000047126  |
| P39053 | IDBG-null | 181984 | Tuba1a       | tubulin, alpha 1A                                                             | ENSMUSG000000072235  |
| P39053 | IDBG-null | 181060 | Kif2a        | kinesin family member 2A                                                      | ENSMUSG0000000021693 |
| P39053 | IDBG-null | 197628 | Sh3glb1      | SH3-domain GRB2-like B1 (endophilin)                                          | ENSMUSG000000037062  |
| P39053 | IDBG-null | 160703 | Sh3gl2       | SH3-domain GRB2-like 2                                                        | ENSMUSG000000028488  |
| P39053 | IDBG-null | 196717 | Sh3gl3       | SH3-domain GRB2-like 3                                                        | ENSMUSG000000030638  |
| P39053 | IDBG-null | 174739 | Sv2a         | synaptic vesicle glycoprotein 2 a                                             | ENSMUSG000000038486  |
| P39053 | IDBG-null | 205183 | Ap2b1        | adaptor-related protein complex 2, beta 1 subunit                             | ENSMUSG000000035152  |
| P39053 | IDBG-null | 180315 | Ap2a1        | adaptor protein complex AP-2, alpha 1 subunit                                 | ENSMUSG000000060279  |
| P39053 | IDBG-null | 143791 | Ap1b1        | adaptor protein complex AP-1, beta 1 subunit                                  | ENSMUSG000000009090  |
| P39053 | IDBG-null | 189699 | Snap91       | synaptosomal-associated protein 91                                            | ENSMUSG000000033419  |
| P39053 | IDBG-null | 213066 | Nsf          | N-ethylmaleimide sensitive fusion protein                                     | ENSMUSG000000034187  |
| P39053 | IDBG-null | 27257  | LRRK2        | leucine-rich repeat kinase 2                                                  | ENSG00000188906      |
| P39053 | IDBG-null | 159493 | Acta2        | actin, alpha 2, smooth muscle, aorta                                          | ENSMUSG000000035783  |
| P39053 | IDBG-null | 132306 | Cadps        | Ca <sup>2+</sup> -dependent secretion activator                               | ENSMUSG000000054423  |
| P39053 | IDBG-null | 214779 | Actg1        | actin, gamma, cytoplasmic 1                                                   | ENSMUSG000000062825  |
| P39053 | IDBG-null | 170381 | Tuba4a       | tubulin, alpha 4A                                                             | ENSMUSG000000026202  |
| P39053 | IDBG-null | 191734 | Lyz2         | lysozyme 2                                                                    | ENSMUSG000000069516  |
| P39053 | IDBG-null | 182053 | Tuba1c       | tubulin, alpha 1C                                                             | ENSMUSG000000043091  |
| P39053 | IDBG-null | 190248 | Kcna1        | potassium voltage-gated channel, shaker-related subfam                        | ENSMUSG000000047976  |
| P39053 | IDBG-null | 211468 | Cnp          | 2',3'-cyclic nucleotide 3' phosphodiesterase                                  | ENSMUSG000000006782  |
| P39053 | IDBG-null | 204179 | Ywhag        | tyrosine 3-monoxygenase/tryptophan 5-monoxygenase                             | ENSMUSG000000051391  |
| P39053 | IDBG-null | 163852 | Calm1        | calmodulin 1                                                                  | ENSMUSG000000001175  |
| P39053 | IDBG-null | 162948 | Lgi1         | leucine-rich repeat LGI family, member 1                                      | ENSMUSG000000067242  |
| P39053 | IDBG-null | 152459 | Gda          | guanine deaminase                                                             | ENSMUSG000000058624  |
| P39053 | IDBG-null | 144350 | Tubb2c       | tubulin, beta 2C                                                              | ENSMUSG000000036752  |
| P39053 | IDBG-null | 185044 | Kcna2        | potassium voltage-gated channel, shaker-related subfam                        | ENSMUSG000000040724  |
| P39053 | IDBG-null | 133249 | Adam22       | a disintegrin and metallopeptidase domain 22                                  | ENSMUSG000000040537  |
| P39053 | IDBG-null | 179144 | Tubb5        | tubulin, beta 5                                                               | ENSMUSG000000001525  |
| P39053 | IDBG-null | 206719 | Kcnab2       | potassium voltage-gated channel, shaker-related subfam                        | ENSMUSG000000028931  |
| P39053 | IDBG-null | 193317 | Dlg4         | discs, large homolog 4 (Drosophila)                                           | ENSMUSG000000020886  |
| P39053 | IDBG-null | 144904 | Grin1        | glutamate receptor, ionotropic, NMDA1 (zeta 1)                                | ENSMUSG000000026959  |

|        |           |         |               |                                                                                  |                    |
|--------|-----------|---------|---------------|----------------------------------------------------------------------------------|--------------------|
| P39053 | IDBG-null | 260830  | Prnp          | prion protein                                                                    | ENSMUSG00000079037 |
| Q99K90 | IDBG-null | 146254  | Traf2         | TNF receptor-associated factor 2                                                 | ENSMUSG00000026942 |
| Q99K90 | IDBG-null | 184197  | Ncor1         | nuclear receptor co-repressor 1                                                  | ENSMUSG00000018501 |
| Q99K90 | IDBG-null | 132962  | Map3k7        | mitogen-activated protein kinase kinase kinase 7                                 | ENSMUSG00000028284 |
| Q99K90 | IDBG-null | 189844  | Tnfrsf1a      | tumor necrosis factor receptor superfamily, member 1a                            | ENSMUSG00000030341 |
| Q99K90 | IDBG-null | 172055  | Hsp90aa1      | heat shock protein 90, alpha (cytosolic), class A member                         | ENSMUSG00000021270 |
| Q99K90 | IDBG-null | 139272  | Cdc37         | cell division cycle 37 homolog (S. cerevisiae)                                   | ENSMUSG00000019471 |
| Q99K90 | IDBG-null | 163423  | Tab1          | TGF-beta activated kinase 1/MAP3K7 binding protein 1                             | ENSMUSG00000022414 |
| Q99K90 | IDBG-null | 167393  | Ppp6c         | protein phosphatase 6, catalytic subunit                                         | ENSMUSG00000026753 |
| Q99K90 | IDBG-null | 31971   | NCOR1         | nuclear receptor corepressor 1                                                   | ENSG00000141027    |
| Q99K90 | IDBG-null | 79992   | ERBB4         | v-erb-a erythroblastic leukemia viral oncogene homolog 4                         | ENSG00000178568    |
| Q99K90 | IDBG-null | 204202  | Trim30a       | tripartite motif-containing 30A                                                  | ENSMUSG00000030921 |
| Q99K90 | IDBG-null | 163320  | 2810422J05Rik | RIKEN cDNA 2810422J05 gene                                                       | ENSMUSG00000055553 |
| Q99K90 | IDBG-null | 197491  | Tmem115       | transmembrane protein 115                                                        | ENSMUSG00000010045 |
| Q99K90 | IDBG-null | 201307  | Ubc           | ubiquitin C                                                                      | ENSMUSG00000008348 |
| O88569 | IDBG-null | 49833   | PRNP          | prion protein                                                                    | ENSG00000171867    |
| O88569 | IDBG-null | 136275  | Pygm          | muscle glycogen phosphorylase                                                    | ENSMUSG00000032648 |
| O88569 | IDBG-null | 88484   | SET           | SET nuclear oncogene                                                             | ENSG00000119335    |
| O88569 | IDBG-null | 209641  | Csnk2a1       | casein kinase 2, alpha 1 polypeptide                                             | ENSMUSG00000074698 |
| O88569 | IDBG-null | 152187  | Eif2s1        | eukaryotic translation initiation factor 2, subunit 1 alpha                      | ENSMUSG00000021116 |
| O88569 | IDBG-null | 191542  | Cct2          | chaperonin containing Tcp1, subunit 2 (beta)                                     | ENSMUSG00000034024 |
| O88569 | IDBG-null | 145597  | Pold2         | polymerase (DNA directed), delta 2, regulatory subunit                           | ENSMUSG00000020471 |
| O88569 | IDBG-null | 173563  | Cct8          | chaperonin containing Tcp1, subunit 8 (theta)                                    | ENSMUSG00000025613 |
| O88569 | IDBG-null | 170572  | Selenbp2      | selenium binding protein 2                                                       | ENSMUSG00000068877 |
| O88569 | IDBG-null | 168985  | Aldh1l1       | aldehyde dehydrogenase 1 family, member L1                                       | ENSMUSG00000030088 |
| O88569 | IDBG-null | 132917  | Cct5          | chaperonin containing Tcp1, subunit 5 (epsilon)                                  | ENSMUSG00000022234 |
| O88569 | IDBG-null | 153613  | Hspa8         | heat shock protein 8                                                             | ENSMUSG00000015656 |
| O88569 | IDBG-null | 207470  | Actb          | actin, beta                                                                      | ENSMUSG00000029580 |
| O88569 | IDBG-null | 160648  | Fbp1          | fructose biphosphatase 1                                                         | ENSMUSG00000069805 |
| O88569 | IDBG-null | 1696497 | Atp5b         | ATP synthase, H+ transporting mitochondrial F1 complex, beta subunit             | ENSMUSG00000025393 |
| O88569 | IDBG-null | 175870  | Mta1          | metastasis associated 1                                                          | ENSMUSG00000021144 |
| O88569 | IDBG-null | 178482  | Alb           | albumin                                                                          | ENSMUSG00000029368 |
| O88569 | IDBG-null | 137484  | Tcp1          | t-complex protein 1                                                              | ENSMUSG00000068039 |
| O88569 | IDBG-null | 163151  | Hspa5         | heat shock protein 5                                                             | ENSMUSG00000026864 |
| O88569 | IDBG-null | 140436  | Dnm2          | dynamamin 2                                                                      | ENSMUSG00000033335 |
| O88569 | IDBG-null | 165898  | Ftcd          | formiminotransferase cyclodeaminase                                              | ENSMUSG00000001155 |
| O88569 | IDBG-null | 145944  | Gm5506        | predicted gene 5506                                                              | ENSMUSG00000005904 |
| O88569 | IDBG-null | 30077   | SNCA          | synuclein, alpha (non A4 component of amyloid precursor protein)                 | ENSG00000145335    |
| O88569 | IDBG-null | 155533  | Dmrt2         | doublesex and mab-3 related transcription factor 2                               | ENSMUSG00000048138 |
| O88569 | IDBG-null | 170858  | Ppp2ca        | protein phosphatase 2 (formerly 2A), catalytic subunit, alpha isoform            | ENSMUSG00000020349 |
| O88569 | IDBG-null | 155224  | Set           | SET nuclear oncogene                                                             | ENSMUSG00000054766 |
| O88569 | IDBG-null | 177358  | Tnf           | tumor necrosis factor                                                            | ENSMUSG00000024401 |
| Q80VW5 | IDBG-null | 193102  | Lrrc4c        | leucine rich repeat containing 4C                                                | ENSMUSG00000050587 |
| Q80VW5 | IDBG-null | 180576  | Myo15         | myosin XV                                                                        | ENSMUSG00000042678 |
| Q80VW5 | IDBG-null | 65343   | MYO7A         | myosin VIIA                                                                      | ENSG00000137474    |
| Q9DBR4 | IDBG-null | 172954  | App           | amyloid beta (A4) precursor protein                                              | ENSMUSG00000022892 |
| Q9DBR4 | IDBG-null | 73479   | MAPK8         | mitogen-activated protein kinase 8                                               | ENSG00000107643    |
| Q9DBR4 | IDBG-null | 15151   | APBB2         | amyloid beta (A4) precursor protein-binding, family B, member 2                  | ENSG00000163697    |
| Q9DBR4 | IDBG-null | 148417  | Mapk8         | mitogen-activated protein kinase 8                                               | ENSMUSG00000021936 |
| Q9DBR4 | IDBG-null | 3485    | SMAD4         | SMAD family member 4                                                             | ENSG00000141646    |
| Q9DBR4 | IDBG-null | 28871   | SMURF1        | SMAD specific E3 ubiquitin protein liqase 1                                      | ENSG00000198742    |
| P46097 | IDBG-null | 207842  | Snap25        | synaptosomal-associated protein 25                                               | ENSMUSG00000027273 |
| P46097 | IDBG-null | 189759  | Vamp2         | vesicle-associated membrane protein 2                                            | ENSMUSG00000020894 |
| P46097 | IDBG-null | 203389  | Stx1a         | syntaxin 1A (brain)                                                              | ENSMUSG00000007207 |
| P46097 | IDBG-null | 22989   | SCAMP5        | secretory carrier membrane protein 5                                             | ENSG000001198794   |
| P46097 | IDBG-null | 30077   | SNCA          | synuclein, alpha (non A4 component of amyloid precursor protein)                 | ENSG00000145335    |
| P46097 | IDBG-null | 189557  | Syt1          | synaptotagmin I                                                                  | ENSMUSG00000035864 |
| Q924W6 | IDBG-null | 147481  | Cbx3          | chromobox homolog 3 (Drosophila HP1 gamma)                                       | ENSMUSG00000029836 |
| Q924W6 | IDBG-null | 189469  | Cbx5          | chromobox homolog 5 (Drosophila HP1a)                                            | ENSMUSG00000009575 |
| Q924W6 | IDBG-null | 209987  | Cbx1          | chromobox homolog 1 (Drosophila HP1 beta)                                        | ENSMUSG00000018666 |
| Q61233 | IDBG-null | 158983  | Mapk14        | mitogen-activated protein kinase 14                                              | ENSMUSG00000053436 |
| Q61233 | IDBG-null | 191007  | Cnn3          | calponin 3, acidic                                                               | ENSMUSG00000053931 |
| Q61233 | IDBG-null | 198115  | Rnf2          | ring finger protein 2                                                            | ENSMUSG00000026484 |
| Q60819 | IDBG-null | 158468  | Axl           | AXL receptor tyrosine kinase                                                     | ENSMUSG00000020602 |
| Q60819 | IDBG-null | 152695  | Sykb          | spleen tyrosine kinase                                                           | ENSMUSG00000021457 |
| Q60819 | IDBG-null | 163447  | Il2rq         | interleukin 2 receptor, gamma chain                                              | ENSMUSG00000031304 |
| Q60819 | IDBG-null | 146254  | Traf2         | TNF receptor-associated factor 2                                                 | ENSMUSG00000026942 |
| P83510 | IDBG-null | 183743  | Nedd4         | neural precursor cell expressed, developmentally down-regulated 4                | ENSMUSG00000032216 |
| P83510 | IDBG-null | 156674  | Tcf4          | transcription factor 4                                                           | ENSMUSG00000053477 |
| P83510 | IDBG-null | 205243  | Cttnb1        | catenin (cadherin associated protein), beta 1                                    | ENSMUSG00000006932 |
| P83510 | IDBG-null | 180861  | Zc3h13        | zinc finger CCH type containing 13                                               | ENSMUSG00000022000 |
| P83510 | IDBG-null | 186169  | Zfp326        | zinc finger protein 326                                                          | ENSMUSG00000029290 |
| P83510 | IDBG-null | 139346  | Mllt10        | myeloid/lymphoid or mixed-lineage leukemia (trithorax homolog)                   | ENSMUSG00000026743 |
| P83510 | IDBG-null | 201862  | Smarcc1       | SWI/SNF related, matrix associated, actin dependent regulator of transcription 1 | ENSMUSG00000032481 |
| P83510 | IDBG-null | 267922  | Smarcd2       | SWI/SNF related, matrix associated, actin dependent regulator of transcription 2 | ENSMUSG00000078619 |
| P83510 | IDBG-null | 181503  | Flii          | flightless I homolog (Drosophila)                                                | ENSMUSG00000002812 |
| P83510 | IDBG-null | 143983  | Trim28        | tripartite motif-containing 28                                                   | ENSMUSG00000005566 |
| P83510 | IDBG-null | 129915  | Rbm14         | RNA binding motif protein 14                                                     | ENSMUSG00000006456 |
| P83510 | IDBG-null | 196765  | Mybbp1a       | MYB binding protein (P160) 1a                                                    | ENSMUSG00000040463 |
| P83510 | IDBG-null | 137755  | Wtpa          | Wilms' tumour 1-associating protein                                              | ENSMUSG00000060475 |
| P83510 | IDBG-null | 135895  | Ubr5          | ubiquitin protein liqase E3 component n-recognin 5                               | ENSMUSG00000037487 |
| P83510 | IDBG-null | 175749  | Dot1l         | DOT1-like, histone H3 methyltransferase (S. cerevisiae)                          | ENSMUSG00000061589 |
| P83510 | IDBG-null | 169383  | Rif1          | Rap1 interacting factor 1 homolog (yeast)                                        | ENSMUSG00000036202 |
| P83510 | IDBG-null | 197552  | Smarcc2       | SWI/SNF related, matrix associated, actin dependent regulator of transcription 2 | ENSMUSG00000025369 |
| P83510 | IDBG-null | 207801  | Atad3a        | ATPase family, AAA domain containing 3A                                          | ENSMUSG00000029036 |
| P83510 | IDBG-null | 130805  | Rbm28         | RNA binding motif protein 28                                                     | ENSMUSG00000029701 |
| P83510 | IDBG-null | 176882  | Chd1l         | chromodomain helicase DNA binding protein 1-like                                 | ENSMUSG00000028089 |
| P83510 | IDBG-null | 140748  | Carm1         | coactivator-associated arginine methyltransferase 1                              | ENSMUSG00000032185 |
| P83510 | IDBG-null | 195347  | Arid1a        | AT rich interactive domain 1A (SWI-like)                                         | ENSMUSG00000007880 |

|        |           |        |              |                                                            |                     |
|--------|-----------|--------|--------------|------------------------------------------------------------|---------------------|
| P83510 | IDBG-null | 187693 | Wdr47        | WD repeat domain 47                                        | ENSMUSG00000040389  |
| P83510 | IDBG-null | 171022 | Smarca5      | SWI/SNF related, matrix associated, actin dependent regu   | ENSMUSG00000031715  |
| P83510 | IDBG-null | 177837 | Tcf7l2       | transcription factor 7-like 2, T-cell specific, HMG-box    | ENSMUSG00000024985  |
| Q8CG79 | IDBG-null | 165835 | Pik3ap1      | phosphoinositide-3-kinase adaptor protein 1                | ENSMUSG00000025017  |
| Q8CG79 | IDBG-null | 173589 | Irs1         | insulin receptor substrate 1                               | ENSMUSG00000055980  |
| Q8CG79 | IDBG-null | 179639 | Rasd1        | RAS, dexamethasone-induced 1                               | ENSMUSG00000049892  |
| P21237 | IDBG-null | 158484 | Ntrk2        | neurotrophic tyrosine kinase, receptor, type 2             | ENSMUSG00000055254  |
| P21237 | IDBG-null | 136615 | Plq          | plasminogen                                                | ENSMUSG00000059481  |
| P21237 | IDBG-null | 158252 | Cpe          | carboxypeptidase E                                         | ENSMUSG00000037852  |
| Q9Z351 | IDBG-null | 174493 | Anxa6        | annexin A6                                                 | ENSMUSG00000018340  |
| Q9Z351 | IDBG-null | 214779 | Actg1        | actin, gamma, cytoplasmic 1                                | ENSMUSG00000062825  |
| Q9Z351 | IDBG-null | 212642 | Grn          | granulin                                                   | ENSMUSG00000034708  |
| Q9CY57 | IDBG-null | 180907 | Prmt1        | protein arginine N-methyltransferase 1                     | ENSMUSG00000052429  |
| Q9CY57 | IDBG-null | 161405 | Prmt5        | protein arginine N-methyltransferase 5                     | ENSMUSG00000023110  |
| Q64378 | IDBG-null | 142259 | Nr3c1        | nuclear receptor subfamily 3, group C, member 1            | ENSMUSG00000024431  |
| Q64378 | IDBG-null | 190479 | Rasgf1       | RAS protein-specific guanine nucleotide-releasing factor 1 | ENSMUSG00000032356  |
| Q07139 | IDBG-null | 211637 | Stat3        | signal transducer and activator of transcription 3         | ENSMUSG00000004040  |
| Q07139 | IDBG-null | 65239  | ECT2         | epithelial cell transforming sequence 2 oncogene           | ENSG00000114346     |
| Q92103 | IDBG-null | 210423 | Cacnb1       | calcium channel, voltage-dependent, beta 1 subunit         | ENSMUSG00000020882  |
| Q92103 | IDBG-null | 187207 | Tcfcp2l1     | transcription factor CP2-like 1                            | ENSMUSG00000026380  |
| Q9DBS9 | IDBG-null | 196509 | Irf8         | interferon regulatory factor 8                             | ENSMUSG00000041515  |
| Q9DBS9 | IDBG-null | 28871  | SMURF1       | SMAD specific E3 ubiquitin protein ligase 1                | ENSG00000198742     |
| Q3TX57 | IDBG-null | 131663 | Esr1         | estrogen receptor 1 (alpha)                                | ENSMUSG00000019768  |
| O54967 | IDBG-null | 161623 | Stxbp1       | syntaxin binding protein 1                                 | ENSMUSG00000026797  |
| O54967 | IDBG-null | 130893 | Klc2         | kinesin light chain 2                                      | ENSMUSG00000024862  |
| O54967 | IDBG-null | 186957 | Eef1a1       | eukaryotic translation elongation factor 1 alpha 1         | ENSMUSG00000037742  |
| O54967 | IDBG-null | 168772 | Kif5c        | kinesin family member 5C                                   | ENSMUSG00000026764  |
| O54967 | IDBG-null | 159551 | Dnm1         | dynamitin 1                                                | ENSMUSG00000026825  |
| O54967 | IDBG-null | 133375 | Tubgcp3      | tubulin, gamma complex associated protein 3                | ENSMUSG00000007059  |
| O54967 | IDBG-null | 173074 | Actr1a       | ARP1 actin-related protein 1 homolog A, centractin alpha   | ENSMUSG00000025228  |
| O54967 | IDBG-null | 153613 | Hspa8        | heat shock protein 8                                       | ENSMUSG00000015656  |
| O54967 | IDBG-null | 211869 | Tubg1        | tubulin, gamma 1                                           | ENSMUSG00000035198  |
| O54967 | IDBG-null | 137748 | Kcnma1       | potassium large conductance calcium-activated channel, s   | ENSMUSG00000063142  |
| O54967 | IDBG-null | 191571 | Khdrbs1      | KH domain containing, RNA binding, signal transduction a   | ENSMUSG00000028790  |
| O54967 | IDBG-null | 132410 | Pik3c3       | phosphoinositide-3-kinase, class 3                         | ENSMUSG00000033628  |
| O54967 | IDBG-null | 156172 | Atp1a3       | ATPase, Na+/K+ transporting, alpha 3 polypeptide           | ENSMUSG00000040907  |
| O54967 | IDBG-null | 205352 | Atp1a2       | ATPase, Na+/K+ transporting, alpha 2 polypeptide           | ENSMUSG00000007097  |
| O54967 | IDBG-null | 186932 | A830010M20R1 | RIKEN cDNA A830010M20 gene                                 | ENSMUSG00000044060  |
| O54967 | IDBG-null | 144990 | Actr1b       | ARP1 actin-related protein 1 homolog B, centractin beta (  | ENSMUSG00000037351  |
| O54967 | IDBG-null | 195461 | Pik3r4       | phosphatidylinositol 3 kinase, regulatory subunit, polypep | ENSMUSG00000023571  |
| O54967 | IDBG-null | 179812 | Atp1a1       | ATPase, Na+/K+ transporting, alpha 1 polypeptide           | ENSMUSG00000033161  |
| O54967 | IDBG-null | 211626 | Tubgcp2      | tubulin, gamma complex associated protein 2                | ENSMUSG00000025474  |
| O54967 | IDBG-null | 201853 | Tubgcp4      | tubulin, gamma complex associated protein 4                | ENSMUSG00000027263  |
| O54967 | IDBG-null | 186141 | Ampd2        | adenosine monophosphate deaminase 2                        | ENSMUSG00000027889  |
| Q8R1A4 | IDBG-null | 200597 | Ywhae        | tyrosine 3-monooxygenase/tryptophan 5-monooxygenase        | ENSMUSG00000020849  |
| Q99KG3 | IDBG-null | 160992 | Lmna         | lamin A                                                    | ENSMUSG00000028063  |
| P41242 | IDBG-null | 129513 | Crebbp       | CREB binding protein                                       | ENSMUSG00000022521  |
| Q3U3T8 | IDBG-null | 18226  | PRKAA1       | protein kinase, AMP-activated, alpha 1 catalytic subunit   | ENSG00000132356     |
| Q9CZW4 | IDBG-null | 141537 | Foxa1        | forkhead box A1                                            | ENSMUSG00000035451  |
| P42209 | IDBG-null | 131376 | Flnb         | filamin, beta                                              | ENSMUSG00000025278  |
| P42209 | IDBG-null | 146513 | Mical1       | microtubule associated monooxygenase, calponin and LIM     | ENSMUSG00000019823  |
| P42209 | IDBG-null | 159635 | Stk38        | serine/threonine kinase 38                                 | ENSMUSG00000024006  |
| Q925Q8 | IDBG-null | 184197 | Ncor1        | nuclear receptor co-repressor 1                            | ENSMUSG00000018501  |
| Q9JIS7 | IDBG-null | 129012 | Cabp4        | calcium binding protein 4                                  | ENSMUSG00000024842  |
| Q8OV03 | IDBG-null | 196509 | Irf8         | interferon regulatory factor 8                             | ENSMUSG000000041515 |
| Q8BQ30 | IDBG-null | 163730 | Traf1        | TNF receptor-associated factor 1                           | ENSMUSG00000026875  |
| Q8C0D9 | IDBG-null | 175763 | Tal1         | T-cell acute lymphocytic leukemia 1                        | ENSMUSG00000028717  |
| P33896 | Ifnar1    | 158468 | Axl          | AXL receptor tyrosine kinase                               | ENSMUSG00000002602  |
| P33896 | Ifnar1    | 164782 | Ep300        | E1A binding protein p300                                   | ENSMUSG00000055024  |
| P33896 | Ifnar1    | 57611  | FBXW11       | F-box and WD repeat domain containing 11                   | ENSG00000072803     |
| P33896 | Ifnar1    | 152917 | Stat4        | signal transducer and activator of transcription 4         | ENSMUSG00000062939  |
| P33896 | Ifnar1    | 132667 | Socs1        | suppressor of cytokine signaling 1                         | ENSMUSG00000038037  |
| Q60751 | Igf1r     | 150150 | Adcyap1r1    | adenylate cyclase activating polypeptide 1 receptor 1      | ENSMUSG00000029778  |
| Q60751 | Igf1r     | 150690 | Grb10        | growth factor receptor bound protein 10                    | ENSMUSG00000020176  |
| Q60751 | Igf1r     | 201307 | Ubc          | ubiquitin C                                                | ENSMUSG00000008348  |
| Q60751 | Igf1r     | 166211 | Gnb2l1       | guanine nucleotide binding protein (G protein), beta poly  | ENSMUSG00000020372  |
| Q60751 | Igf1r     | 205027 | Giyyf1       | GRB10 interacting GYF protein 1                            | ENSMUSG00000029714  |
| P40694 | Ighmbp2   | 171427 | Btk          | Bruton agammaglobulinemia tyrosine kinase                  | ENSMUSG00000031264  |
| P40694 | Ighmbp2   | 211637 | Stat3        | signal transducer and activator of transcription 3         | ENSMUSG00000004040  |
| Q9Z1M8 | Ik        | 160992 | Lmna         | lamin A                                                    | ENSMUSG00000028063  |
| Q03267 | Ikzf1     | 158495 | Sumo1        | SMT3 suppressor of mif two 3 homolog 1 (yeast)             | ENSMUSG00000026021  |
| Q03267 | Ikzf1     | 176105 | Pias3        | protein inhibitor of activated STAT 3                      | ENSMUSG00000028101  |
| Q03267 | Ikzf1     | 65053  | ULK1         | unc-51-like kinase 1 (C. elegans)                          | ENSG00000177169     |
| Q03267 | Ikzf1     | 23397  | SIN3A        | SIN3 homolog A, transcription regulator (yeast)            | ENSG00000169375     |
| Q03267 | Ikzf1     | 35825  | SIN3B        | SIN3 homolog B, transcription regulator (yeast)            | ENSG00000127511     |
| Q03267 | Ikzf1     | 14532  | CHD4         | chromodomain helicase DNA binding protein 4                | ENSG00000111642     |
| Q03267 | Ikzf1     | 6522   | CTBP1        | C-terminal binding protein 1                               | ENSG00000159692     |
| Q03267 | Ikzf1     | 28592  | SMARCA4      | SWI/SNF related, matrix associated, actin dependent regu   | ENSG00000127616     |
| Q03267 | Ikzf1     | 151396 | Ube2i        | ubiquitin-conjugating enzyme E2I                           | ENSMUSG00000015120  |
| Q03267 | Ikzf1     | 173092 | Uba2         | ubiquitin-like modifier activating enzyme 2                | ENSMUSG00000052997  |
| Q03267 | Ikzf1     | 167001 | Gzmb         | granzyme B                                                 | ENSMUSG00000015437  |
| Q03267 | Ikzf1     | 188351 | Cd4          | CD4 antigen                                                | ENSMUSG00000023274  |
| Q03267 | Ikzf1     | 203203 | Nos2         | nitric oxide synthase 2, inducible                         | ENSMUSG00000020826  |
| Q03267 | Ikzf1     | 171764 | Ldb1         | LIM domain binding 1                                       | ENSMUSG00000025223  |
| Q03267 | Ikzf1     | 175763 | Tal1         | T-cell acute lymphocytic leukemia 1                        | ENSMUSG00000028717  |
| Q03267 | Ikzf1     | 190457 | Chd3         | chromodomain helicase DNA binding protein 3                | ENSMUSG00000018474  |
| Q03267 | Ikzf1     | 143980 | Hdac2        | histone deacetylase 2                                      | ENSMUSG00000019777  |
| Q03267 | Ikzf1     | 141000 | Smarca4      | SWI/SNF related, matrix associated, actin dependent regu   | ENSMUSG00000032187  |
| Q03267 | Ikzf1     | 201862 | Smarcc1      | SWI/SNF related, matrix associated, actin dependent regu   | ENSMUSG00000032481  |

|        |         |        |          |                                                                                                 |                      |
|--------|---------|--------|----------|-------------------------------------------------------------------------------------------------|----------------------|
| Q03267 | Ikzf1   | 191058 | Hdac1    | histone deacetylase 1                                                                           | ENSMUSG00000028800   |
| Q03267 | Ikzf1   | 210625 | Ikzf3    | IKAROS family zinc finger 3                                                                     | ENSMUSG00000018168   |
| Q03267 | Ikzf1   | 155600 | Smarca2  | SWI/SNF related, matrix associated, actin dependent regulator of chromatin subfamily A member 2 | ENSMUSG00000024921   |
| Q03267 | Ikzf1   | 211193 | Ctbp2    | C-terminal binding protein 2                                                                    | ENSMUSG00000030970   |
| Q60837 | Il12rb1 | 172251 | Irf1     | interferon regulatory factor 1                                                                  | ENSMUSG00000018899   |
| Q60837 | Il12rb1 | 190185 | Sfp1     | SFFV proviral integration 1                                                                     | ENSMUSG00000002111   |
| Q60837 | Il12rb1 | 181123 | Irf3     | interferon regulatory factor 3                                                                  | ENSMUSG00000003184   |
| Q60837 | Il12rb1 | 164545 | Il12b    | interleukin 12b                                                                                 | ENSMUSG00000004296   |
| Q61098 | Il18r1  | 154747 | Irak1    | interleukin-1 receptor-associated kinase 1                                                      | ENSMUSG00000031392   |
| Q61098 | Il18r1  | 196509 | Irf8     | interferon regulatory factor 8                                                                  | ENSMUSG0000000431515 |
| Q80XF5 | Il22ra2 | 192083 | Il22     | interleukin 22                                                                                  | ENSMUSG000000074695  |
| Q8CGK5 | Il28ra  | 211637 | Stat3    | signal transducer and activator of transcription 3                                              | ENSMUSG00000004040   |
| Q00560 | Il6st   | 214604 | Socs3    | suppressor of cytokine signaling 3                                                              | ENSMUSG000000053113  |
| Q00560 | Il6st   | 139050 | Il11     | interleukin 11                                                                                  | ENSMUSG00000004371   |
| Q00560 | Il6st   | 138483 | Il11ra1  | interleukin 11 receptor, alpha chain 1                                                          | ENSMUSG000000073889  |
| Q00560 | Il6st   | 142284 | Osm      | oncostatin M                                                                                    | ENSMUSG000000058755  |
| Q00560 | Il6st   | 102945 | IL6R     | interleukin 6 receptor                                                                          | ENSG00000160712      |
| Q00560 | Il6st   | 129240 | Syp      | synaptophysin                                                                                   | ENSMUSG000000031144  |
| Q00560 | Il6st   | 156977 | Jak2     | Janus kinase 2                                                                                  | ENSMUSG000000024789  |
| Q00560 | Il6st   | 196834 | Ptpn11   | protein tyrosine phosphatase, non-receptor type 11                                              | ENSMUSG000000043733  |
| Q00560 | Il6st   | 144970 | Il6      | interleukin 6                                                                                   | ENSMUSG000000025746  |
| Q00560 | Il6st   | 165233 | Il6ra    | interleukin 6 receptor, alpha                                                                   | ENSMUSG000000027947  |
| Q00560 | Il6st   | 64029  | UBC      | ubiquitin C                                                                                     | ENSG00000150991      |
| Q00560 | Il6st   | 74417  | CBL      | Cas-Br-M (murine) ecotropic retroviral transforming sequence                                    | ENSG00000110395      |
| Q00560 | Il6st   | 58105  | PTPN11   | protein tyrosine phosphatase, non-receptor type 11                                              | ENSG00000179295      |
| Q00560 | Il6st   | 214821 | Hqs      | HGF-regulated tyrosine kinase substrate                                                         | ENSMUSG000000025793  |
| Q00560 | Il6st   | 197587 | Lmo4     | LIM domain only 4                                                                               | ENSMUSG000000028266  |
| Q00560 | Il6st   | 209673 | Il27     | interleukin 27                                                                                  | ENSMUSG000000044701  |
| Q632W7 | Inadl   | 131990 | Grin2a   | glutamate receptor, ionotropic, NMDA2A (epsilon 1)                                              | ENSMUSG000000059003  |
| Q632W7 | Inadl   | 3255   | KCNJ15   | potassium inwardly-rectifying channel, subfamily J, member 15                                   | ENSG00000157551      |
| Q632W7 | Inadl   | 205443 | Kcnj10   | potassium inwardly-rectifying channel, subfamily J, member 10                                   | ENSMUSG000000044708  |
| Q632W7 | Inadl   | 179204 | Kcnj15   | potassium inwardly-rectifying channel, subfamily J, member 15                                   | ENSMUSG000000062609  |
| Q632W7 | Inadl   | 184594 | Grin2d   | glutamate receptor, ionotropic, NMDA2D (epsilon 4)                                              | ENSMUSG000000002771  |
| Q632W7 | Inadl   | 194672 | Grin2b   | glutamate receptor, ionotropic, NMDA2B (epsilon 2)                                              | ENSMUSG000000030209  |
| Q632W7 | Inadl   | 214257 | Grin2c   | glutamate receptor, ionotropic, NMDA2C (epsilon 3)                                              | ENSMUSG000000020734  |
| Q632W7 | Inadl   | 180291 | Htr2a    | 5-hydroxytryptamine (serotonin) receptor 2A                                                     | ENSMUSG000000034997  |
| Q8VEK6 | Inq3    | 186954 | Ldha     | lactate dehydrogenase A                                                                         | ENSMUSG000000063229  |
| Q8VEK6 | Inq3    | 158996 | Hdgf     | hepatoma-derived growth factor                                                                  | ENSMUSG000000004897  |
| Q8VEK6 | Inq3    | 208186 | Trrap    | transformation/transcription domain-associated protein                                          | ENSMUSG000000045482  |
| Q8VEK6 | Inq3    | 190143 | Ep400    | E1A binding protein p400                                                                        | ENSMUSG000000029505  |
| Q8VEK6 | Inq3    | 132192 | Kat5     | K(lysine) acetyltransferase 5                                                                   | ENSMUSG000000024926  |
| Q8VEK6 | Inq3    | 179881 | Dmap1    | DNA methyltransferase 1-associated protein 1                                                    | ENSMUSG000000009640  |
| Q8VEK6 | Inq3    | 182674 | Ciapin1  | cytokine induced apoptosis inhibitor 1                                                          | ENSMUSG000000031781  |
| Q8VEK6 | Inq3    | 135252 | Brd8     | bromodomain containing 8                                                                        | ENSMUSG000000003778  |
| Q8VEK6 | Inq3    | 190649 | Morf4l1  | mortality factor 4 like 1                                                                       | ENSMUSG000000062270  |
| Q8VEK6 | Inq3    | 161272 | Actq2    | actin, gamma 2, smooth muscle, enteric                                                          | ENSMUSG000000059430  |
| Q8VEK6 | Inq3    | 207470 | Actb     | actin, beta                                                                                     | ENSMUSG000000029580  |
| Q8VEK6 | Inq3    | 136942 | Actl6a   | actin-like 6A                                                                                   | ENSMUSG000000027671  |
| Q8VEK6 | Inq3    | 214779 | Actg1    | actin, gamma, cytoplasmic 1                                                                     | ENSMUSG000000062825  |
| Q8VEK6 | Inq3    | 102316 | VPS72    | vacuolar protein sorting 72 homolog (S. cerevisiae)                                             | ENSG00000163159      |
| Q8VEK6 | Inq3    | 127970 | Epc1     | enhancer of polycomb homolog 1 (Drosophila)                                                     | ENSMUSG000000024240  |
| Q8VEK6 | Inq3    | 168697 | Epc2     | enhancer of polycomb homolog 2 (Drosophila)                                                     | ENSMUSG000000069495  |
| Q8VEK6 | Inq3    | 144556 | Myc      | myelocytomatosis oncogene                                                                       | ENSMUSG000000023346  |
| Q8VEK6 | Inq3    | 151490 | Max      | Max protein                                                                                     | ENSMUSG000000059436  |
| Q8VEK6 | Inq3    | 187207 | Tcfcp2l1 | transcription factor CP2-like 1                                                                 | ENSMUSG000000026380  |
| Q8VEK6 | Inq3    | 159268 | Esrrb    | estrogen related receptor, beta                                                                 | ENSMUSG000000021255  |
| Q9ES52 | Inpp5d  | 195070 | Plcg2    | phospholipase C, gamma 2                                                                        | ENSMUSG000000034330  |
| Q9ES52 | Inpp5d  | 211621 | Plcg1    | phospholipase C, gamma 1                                                                        | ENSMUSG000000016933  |
| Q9ES52 | Inpp5d  | 204832 | Slamf1   | signaling lymphocytic activation molecule family member 1                                       | ENSMUSG000000015316  |
| Q9ES52 | Inpp5d  | 178868 | Pik3r1   | phosphatidylinositol 3-kinase, regulatory subunit, polypeptide gamma                            | ENSMUSG000000041417  |
| Q9ES52 | Inpp5d  | 164495 | Shc1     | src homology 2 domain-containing transforming protein C                                         | ENSMUSG000000042626  |
| Q9ES52 | Inpp5d  | 214339 | Grb2     | growth factor receptor bound protein 2                                                          | ENSMUSG000000059923  |
| Q9ES52 | Inpp5d  | 167366 | Jak1     | Janus kinase 1                                                                                  | ENSMUSG000000028530  |
| Q9ES52 | Inpp5d  | 166648 | Jak3     | Janus kinase 3                                                                                  | ENSMUSG000000031805  |
| Q9ES52 | Inpp5d  | 96377  | CSF3R    | colony stimulating factor 3 receptor (granulocyte)                                              | ENSG00000119535      |
| Q9ES52 | Inpp5d  | 187638 | Csf3r    | colony stimulating factor 3 receptor (granulocyte)                                              | ENSMUSG000000028859  |
| Q9ES52 | Inpp5d  | 171574 | Cd22     | CD22 antigen                                                                                    | ENSMUSG000000030577  |
| Q9ES52 | Inpp5d  | 103007 | SHC1     | SHC (Src homology 2 domain containing) transforming protein 1                                   | ENSG00000160691      |
| Q9ES52 | Inpp5d  | 203935 | Fcgr2b   | Fc receptor, IgG, low affinity IIb                                                              | ENSMUSG000000026656  |
| Q9ES52 | Inpp5d  | 202184 | Inpp1    | inositol polyphosphate phosphatase-like 1                                                       | ENSMUSG000000032737  |
| Q9ES52 | Inpp5d  | 158280 | Hnrnpk   | heterogeneous nuclear ribonucleoprotein K                                                       | ENSMUSG000000021546  |
| Q9ES52 | Inpp5d  | 32229  | LRRK1    | leucine-rich repeat kinase 1                                                                    | ENSG00000154237      |
| Q9ES52 | Inpp5d  | 199566 | Gab2     | growth factor receptor bound protein 2-associated protein 2                                     | ENSMUSG000000004508  |
| Q9ES52 | Inpp5d  | 156241 | Dok3     | docking protein 3                                                                               | ENSMUSG000000035711  |
| Q9ES52 | Inpp5d  | 199949 | Sos1     | son of sevenless homolog 1 (Drosophila)                                                         | ENSMUSG000000024241  |
| Q9ES52 | Inpp5d  | 144636 | Sos2     | son of sevenless homolog 2 (Drosophila)                                                         | ENSMUSG000000034801  |
| Q9ES52 | Inpp5d  | 2349   | BCR      | breakpoint cluster region                                                                       | ENSG00000186716      |
| Q9ES52 | Inpp5d  | 137429 | Rsu1     | Ras suppressor protein 1                                                                        | ENSMUSG000000026727  |
| Q9ES52 | Inpp5d  | 89599  | ABL1     | c-abl oncogene 1, non-receptor tyrosine kinase                                                  | ENSG00000097007      |
| Q9ES52 | Inpp5d  | 196834 | Ptpn11   | protein tyrosine phosphatase, non-receptor type 11                                              | ENSMUSG000000043733  |
| Q9ES52 | Inpp5d  | 145005 | Asap1    | ArfGAP with SH3 domain, ankyrin repeat and PH domain1                                           | ENSMUSG000000022377  |
| Q9ES52 | Inpp5d  | 165254 | Map4k1   | mitogen-activated protein kinase kinase kinase kinase 1                                         | ENSMUSG000000037337  |
| Q9ES52 | Inpp5d  | 159342 | Dok1     | docking protein 1                                                                               | ENSMUSG000000068335  |
| Q9ES52 | Inpp5d  | 149650 | Nck2     | non-catalytic region of tyrosine kinase adaptor protein 2                                       | ENSMUSG000000066877  |
| Q9ES52 | Inpp5d  | 170167 | Tec      | tec protein tyrosine kinase                                                                     | ENSMUSG000000029217  |
| Q9ES52 | Inpp5d  | 170552 | Csk      | c-src tyrosine kinase                                                                           | ENSMUSG000000032312  |
| Q9ES52 | Inpp5d  | 177951 | Phgdh    | 3-phosphoglycerate dehydrogenase                                                                | ENSMUSG000000053398  |
| Q9ES52 | Inpp5d  | 170464 | Rasa1    | RAS p21 protein activator 1                                                                     | ENSMUSG000000021549  |
| Q9ES52 | Inpp5d  | 193200 | Nck1     | non-catalytic region of tyrosine kinase adaptor protein 1                                       | ENSMUSG000000032475  |



|        |          |        |          |                                                                    |                     |
|--------|----------|--------|----------|--------------------------------------------------------------------|---------------------|
| Q9ES52 | Inpp5d   | 179481 | Dok2     | docking protein 2                                                  | ENSMUSG00000022102  |
| Q9ES52 | Inpp5d   | 628689 | PIK3R1   | Phosphatidylinositol 3-kinase regulatory subunit alpha             | ENSBTAG00000010989  |
| P35569 | Irs1     | 188252 | Phip     | pleckstrin homology domain interacting protein                     | ENSMUSG00000032253  |
| P35569 | Irs1     | 176947 | Ncl      | nucleolin                                                          | ENSMUSG000000026234 |
| P35569 | Irs1     | 178868 | Pik3r1   | phosphatidylinositol 3-kinase, regulatory subunit, polypeptide     | ENSMUSG000000041417 |
| P35569 | Irs1     | 204403 | Mtor     | mechanistic target of rapamycin (serine/threonine kinase)          | ENSMUSG00000028991  |
| P35569 | Irs1     | 80957  | PTPN1    | protein tyrosine phosphatase, non-receptor type 1                  | ENSG00000196396     |
| P35569 | Irs1     | 22529  | INSR     | insulin receptor                                                   | ENSG00000171105     |
| P35569 | Irs1     | 167366 | Jak1     | Janus kinase 1                                                     | ENSMUSG00000028530  |
| P35569 | Irs1     | 209275 | Il4ra    | interleukin 4 receptor, alpha                                      | ENSMUSG000000030748 |
| P35569 | Irs1     | 156977 | Jak2     | Janus kinase 2                                                     | ENSMUSG000000024789 |
| P35569 | Irs1     | 166648 | Jak3     | Janus kinase 3                                                     | ENSMUSG000000031805 |
| P35569 | Irs1     | 61938  | RPS6KB1  | ribosomal protein S6 kinase, 70kDa, polypeptide 1                  | ENSG00000108443     |
| P35569 | Irs1     | 99443  | JAK1     | Janus kinase 1                                                     | ENSG00000162434     |
| P35569 | Irs1     | 148417 | Mapk8    | mitogen-activated protein kinase 8                                 | ENSMUSG000000021936 |
| P35569 | Irs1     | 205243 | Ctnnb1   | catenin (cadherin associated protein), beta 1                      | ENSMUSG00000006932  |
| P35569 | Irs1     | 212973 | Ccnd1    | cyclin D1                                                          | ENSMUSG00000070348  |
| P35569 | Irs1     | 211991 | Ywhab    | tyrosine 3-monooxygenase/tryptophan 5-monooxygenase                | ENSMUSG000000018326 |
| P35569 | Irs1     | 200597 | Ywhae    | tyrosine 3-monooxygenase/tryptophan 5-monooxygenase                | ENSMUSG000000020849 |
| P35569 | Irs1     | 199014 | Eif2ak2  | eukaryotic translation initiation factor 2-alpha kinase 2          | ENSMUSG000000024079 |
| P35569 | Irs1     | 143980 | Hdac2    | histone deacetylase 2                                              | ENSMUSG000000019777 |
| P35569 | Irs1     | 201307 | Ubc      | ubiquitin C                                                        | ENSMUSG00000008348  |
| P35569 | Irs1     | 196834 | Ptpn11   | protein tyrosine phosphatase, non-receptor type 11                 | ENSMUSG000000043733 |
| P35569 | Irs1     | 207716 | Trp53bp2 | transformation related protein 53 binding protein 2                | ENSMUSG000000026510 |
| P35569 | Irs1     | 209638 | Phb      | prohibitin                                                         | ENSMUSG000000038845 |
| P35569 | Irs1     | 141714 | Ppp2r1a  | protein phosphatase 2 (formerly 2A), regulatory subunit A          | ENSMUSG00000007564  |
| P35569 | Irs1     | 136238 | Hist1h1d | histone cluster 1, H1d                                             | ENSMUSG000000052565 |
| P35569 | Irs1     | 159441 | Sirt1    | sirtuin 1 (silent mating type information regulation 2, homolog 1) | ENSMUSG000000020063 |
| Q920Y7 | Irs4     | 201307 | Ubc      | ubiquitin C                                                        | ENSMUSG00000008348  |
| Q920Y7 | Irs4     | 128118 | Asb4     | ankyrin repeat and SOCS box-containing 4                           | ENSMUSG000000042607 |
| P24063 | Itgal    | 167243 | Itgb2    | integrin beta 2                                                    | ENSMUSG00000000290  |
| P24063 | Itgal    | 182078 | Hsp90b1  | heat shock protein 90, beta (Grp94), member 1                      | ENSMUSG000000020048 |
| P09055 | Itgb1    | 177329 | Ltb      | lymphotoxin B                                                      | ENSMUSG000000024399 |
| P09055 | Itgb1    | 206253 | Tmem158  | transmembrane protein 158                                          | ENSMUSG000000054871 |
| P09055 | Itgb1    | 208539 | Nme2     | non-metastatic cells 2, protein (NM23B) expressed in               | ENSMUSG000000020857 |
| P09055 | Itgb1    | 154844 | Fam203a  | family with sequence similarity 203, member A                      | ENSMUSG000000022554 |
| P09055 | Itgb1    | 183905 | Itga2    | integrin alpha 2                                                   | ENSMUSG000000015533 |
| P09055 | Itgb1    | 168623 | Tspan3   | tetraspanin 3                                                      | ENSMUSG000000032324 |
| P09055 | Itgb1    | 165137 | Cd47     | CD47 antigen (Rh-related antigen, integrin-associated sig          | ENSMUSG000000055447 |
| P09055 | Itgb1    | 136362 | Cldn11   | claudin 11                                                         | ENSMUSG000000037625 |
| P09055 | Itgb1    | 175174 | Sparc    | secreted acidic cysteine rich glycoprotein                         | ENSMUSG000000018593 |
| P09055 | Itgb1    | 204955 | Ilk      | integrin linked kinase                                             | ENSMUSG000000030890 |
| P09055 | Itgb1    | 137732 | Vegfb    | vascular endothelial growth factor B                               | ENSMUSG000000024962 |
| P09055 | Itgb1    | 154384 | Lgals3   | lectin, galactose binding, soluble 3                               | ENSMUSG000000050335 |
| P09055 | Itgb1    | 209447 | Itga3    | integrin alpha 3                                                   | ENSMUSG000000001507 |
| P09055 | Itgb1    | 194595 | Fgr      | Gardner-Rasheed feline sarcoma viral (Fgr) oncogene hom            | ENSMUSG000000028874 |
| P09055 | Itgb1    | 158216 | Abi1     | c-abl oncogene 1, non-receptor tyrosine kinase                     | ENSMUSG000000026842 |
| P09055 | Itgb1    | 209984 | Hck      | hemopoietic cell kinase                                            | ENSMUSG000000003283 |
| P09055 | Itgb1    | 104034 | NCSTN    | nicastrin                                                          | ENSG00000162736     |
| P09055 | Itgb1    | 11235  | PSEN1    | presenilin 1                                                       | ENSG00000080815     |
| P09055 | Itgb1    | 184242 | Cnot1    | CCR4-NOT transcription complex, subunit 1                          | ENSMUSG000000036550 |
| P09055 | Itgb1    | 189590 | Itga5    | integrin alpha 5 (fibronectin receptor alpha)                      | ENSMUSG000000005555 |
| P09055 | Itgb1    | 198684 | Itga7    | integrin alpha 7                                                   | ENSMUSG000000025348 |
| P09055 | Itgb1    | 212973 | Ccnd1    | cyclin D1                                                          | ENSMUSG000000070348 |
| P09055 | Itgb1    | 158959 | Csf2rb   | colony stimulating factor 2 receptor, beta, low-affinity (gr       | ENSMUSG000000071713 |
| Q70309 | Itgb5    | 148322 | Ptk2     | PTK2 protein tyrosine kinase 2                                     | ENSMUSG000000022607 |
| Q920Q8 | Ivns1abp | 155851 | Arhgef1  | Rho guanine nucleotide exchange factor (GEF) 1                     | ENSMUSG000000040940 |
| Q920Q8 | Ivns1abp | 155698 | Dmrtc2   | doublesex and mab-3 related transcription factor like fam          | ENSMUSG000000011349 |
| Q920Q8 | Ivns1abp | 163429 | El1      | elongation factor RNA polymerase II                                | ENSMUSG000000070002 |
| Q920Q8 | Ivns1abp | 174161 | Tcf3     | transcription factor 3                                             | ENSMUSG000000020167 |
| Q920Q8 | Ivns1abp | 183812 | Cited4   | Cbp/p300-interacting transactivator, with Glu/Asp-rich car         | ENSMUSG000000070803 |
| Q920Q8 | Ivns1abp | 152564 | Zfp275   | zinc finger protein 275                                            | ENSMUSG000000031365 |
| P09450 | Junb     | 150158 | Fosb     | FBJ osteosarcoma oncogene B                                        | ENSMUSG000000003545 |
| P09450 | Junb     | 158538 | Fos      | FBJ osteosarcoma oncogene                                          | ENSMUSG000000021250 |
| P09450 | Junb     | 191058 | Hdac1    | histone deacetylase 1                                              | ENSMUSG000000028800 |
| P09450 | Junb     | 143980 | Hdac2    | histone deacetylase 2                                              | ENSMUSG000000019777 |
| P09450 | Junb     | 211637 | Stat3    | signal transducer and activator of transcription 3                 | ENSMUSG000000004040 |
| P09450 | Junb     | 207513 | Prkcz    | protein kinase C, zeta                                             | ENSMUSG000000029053 |
| P09450 | Junb     | 40504  | CCL2     | chemokine (C-C motif) ligand 2                                     | ENSG00000108691     |
| P09450 | Junb     | 177358 | Tnf      | tumor necrosis factor                                              | ENSMUSG000000024401 |
| P09450 | Junb     | 144970 | Il6      | interleukin 6                                                      | ENSMUSG000000025746 |
| P09450 | Junb     | 164545 | Il12b    | interleukin 12b                                                    | ENSMUSG00000004296  |
| P09450 | Junb     | 134620 | Dmtf1    | cyclin D binding myb-like transcription factor 1                   | ENSMUSG000000042508 |
| P09450 | Junb     | 26868  | ELF1     | E74-like factor 1 (ets domain transcription factor)                | ENSG00000120690     |
| P09450 | Junb     | 190185 | Sfp1     | SFFV proviral integration 1                                        | ENSMUSG000000002111 |
| P09450 | Junb     | 75950  | FLI1     | Friend leukemia virus integration 1                                | ENSG00000151702     |
| P09450 | Junb     | 75897  | ETS1     | v-ets erythroblastosis virus E26 oncogene homolog 1 (avi           | ENSG00000134954     |
| P09450 | Junb     | 158624 | Batf     | basic leucine zipper transcription factor, ATF-like                | ENSMUSG000000034266 |
| P09450 | Junb     | 210517 | Itch     | itchy, E3 ubiquitin protein ligase                                 | ENSMUSG000000027598 |
| P09450 | Junb     | 208706 | Batf3    | basic leucine zipper transcription factor, ATF-like 3              | ENSMUSG000000026630 |
| P09450 | Junb     | 201307 | Ubc      | ubiquitin C                                                        | ENSMUSG00000008348  |
| P09450 | Junb     | 175693 | Smad3    | MAD homolog 3 (Drosophila)                                         | ENSMUSG000000032402 |
| P09450 | Junb     | 186053 | Myod1    | myogenic differentiation 1                                         | ENSMUSG000000009471 |
| Q61762 | Kcna5    | 207513 | Prkcz    | protein kinase C, zeta                                             | ENSMUSG000000029053 |
| P63143 | Kcnab1   | 30077  | SNCA     | synuclein, alpha (non A4 component of amyloid precursor            | ENSG00000145335     |
| P62482 | Kcnab2   | 30077  | SNCA     | synuclein, alpha (non A4 component of amyloid precursor            | ENSG00000145335     |
| P62482 | Kcnab2   | 214779 | Actg1    | actin, gamma, cytoplasmic 1                                        | ENSMUSG000000062825 |
| P62482 | Kcnab2   | 170381 | Tuba4a   | tubulin, alpha 4A                                                  | ENSMUSG00000026202  |
| P62482 | Kcnab2   | 191734 | Lyz2     | lysozyme 2                                                         | ENSMUSG000000069516 |

|        |          |        |          |                                                                                  |                     |
|--------|----------|--------|----------|----------------------------------------------------------------------------------|---------------------|
| P62482 | Kcnab2   | 182053 | Tuba1c   | tubulin, alpha 1C                                                                | ENSMUSG00000043091  |
| P62482 | Kcnab2   | 190248 | Kcna1    | potassium voltage-gated channel, shaker-related subfamily 1                      | ENSMUSG00000047976  |
| P62482 | Kcnab2   | 211468 | Cnp      | 2',3'-cyclic nucleotide 3' phosphodiesterase                                     | ENSMUSG00000006782  |
| P62482 | Kcnab2   | 204179 | Ywhag    | tyrosine 3-monooxygenase/tryptophan 5-monooxygenase                              | ENSMUSG00000051391  |
| P62482 | Kcnab2   | 163852 | Calm1    | calmodulin 1                                                                     | ENSMUSG00000001175  |
| P62482 | Kcnab2   | 162948 | Lgi1     | leucine-rich repeat LGI family, member 1                                         | ENSMUSG00000067242  |
| P62482 | Kcnab2   | 135538 | Syn1     | synapsin I                                                                       | ENSMUSG00000037217  |
| P62482 | Kcnab2   | 152459 | Gda      | guanine deaminase                                                                | ENSMUSG00000058624  |
| P62482 | Kcnab2   | 144350 | Tubb2c   | tubulin, beta 2C                                                                 | ENSMUSG00000036752  |
| P62482 | Kcnab2   | 159551 | Dnm1     | dynamain 1                                                                       | ENSMUSG00000026825  |
| P62482 | Kcnab2   | 185044 | Kcna2    | potassium voltage-gated channel, shaker-related subfamily 2                      | ENSMUSG00000040724  |
| P62482 | Kcnab2   | 133249 | Adam22   | a disintegrin and metallopeptidase domain 22                                     | ENSMUSG00000040537  |
| P62482 | Kcnab2   | 179144 | Tubb5    | tubulin, beta 5                                                                  | ENSMUSG00000001525  |
| P62482 | Kcnab2   | 193317 | Dlg4     | discs, large homolog 4 (Drosophila)                                              | ENSMUSG00000020886  |
| Q03719 | Kcnd1    | 197072 | Il16     | interleukin 16                                                                   | ENSMUSG000000001741 |
| P41230 | Kdm5c    | 189502 | Nfe2     | nuclear factor, erythroid derived 2                                              | ENSMUSG00000058794  |
| Q62240 | Kdm5d    | 144115 | Ewsr1    | Ewing sarcoma breakpoint region 1                                                | ENSMUSG00000009079  |
| Q62240 | Kdm5d    | 189502 | Nfe2     | nuclear factor, erythroid derived 2                                              | ENSMUSG00000058794  |
| Q62240 | Kdm5d    | 250737 | Zbtb9    | zinc finger and BTB domain containing 9                                          | ENSMUSG00000079605  |
| Q5NCY0 | Kdm6b    | 144562 | Ash2l    | ash2 (absent, small, or homeotic)-like (Drosophila)                              | ENSMUSG00000031575  |
| Q5NCY0 | Kdm6b    | 191981 | Rbbp5    | retinoblastoma binding protein 5                                                 | ENSMUSG00000026439  |
| Q5NCY0 | Kdm6b    | 201862 | Smarcc1  | SWI/SNF related, matrix associated, actin dependent regulator of transcription 1 | ENSMUSG00000032481  |
| Q5NCY0 | Kdm6b    | 141000 | Smarca4  | SWI/SNF related, matrix associated, actin dependent regulator of transcription 4 | ENSMUSG00000032187  |
| P97329 | Kif20a   | 46715  | KIF20A   | kinesin family member 20A                                                        | ENSG00000112984     |
| P33174 | Kif4     | 107733 | CEP170   | centrosomal protein 170kDa                                                       | ENSG00000143702     |
| P33174 | Kif4     | 30703  | PRC1     | protein regulator of cytokinesis 1                                               | ENSG00000198901     |
| P33174 | Kif4     | 93655  | TUBGCP2  | tubulin, gamma complex associated protein 2                                      | ENSG00000130640     |
| P33174 | Kif4     | 74423  | KIF4A    | kinesin family member 4A                                                         | ENSG00000090889     |
| P70188 | Kifap3   | 154896 | Spna2    | spectrin alpha 2                                                                 | ENSMUSG00000057738  |
| P70188 | Kifap3   | 210062 | Kif3b    | kinesin family member 3B                                                         | ENSMUSG000000027475 |
| P70188 | Kifap3   | 129545 | Cdh2     | cadherin 2                                                                       | ENSMUSG00000024304  |
| P70188 | Kifap3   | 184766 | Ctnd1    | catenin (cadherin associated protein), delta 1                                   | ENSMUSG00000034101  |
| P70188 | Kifap3   | 205243 | Cttnb1   | catenin (cadherin associated protein), beta 1                                    | ENSMUSG00000006932  |
| O35082 | Kl       | 213058 | Wnt3     | wingless-related MMTV integration site 3                                         | ENSMUSG00000000125  |
| O35082 | Kl       | 181251 | Wnt1     | wingless-related MMTV integration site 1                                         | ENSMUSG00000022997  |
| O35082 | Kl       | 141666 | Wnt5a    | wingless-related MMTV integration site 5A                                        | ENSMUSG00000021994  |
| O35082 | Kl       | 198435 | Wnt4     | wingless-related MMTV integration site 4                                         | ENSMUSG00000036856  |
| O35082 | Kl       | 12968  | FGF23    | fibroblast growth factor 23                                                      | ENSG00000118972     |
| O35082 | Kl       | 143767 | Fgfr1    | fibroblast growth factor receptor 1                                              | ENSMUSG00000031565  |
| O35082 | Kl       | 17796  | FGFR1    | fibroblast growth factor receptor 1                                              | ENSG00000077782     |
| O35082 | Kl       | 154924 | Fgfr4    | fibroblast growth factor receptor 4                                              | ENSMUSG00000005320  |
| O35082 | Kl       | 153744 | Fgfr3    | fibroblast growth factor receptor 3                                              | ENSMUSG00000054252  |
| O88447 | Klc1     | 149884 | Mapk8ip3 | mitogen-activated protein kinase 8 interacting protein 3                         | ENSMUSG00000024163  |
| O88447 | Klc1     | 205238 | Clstn1   | calsyntenin 1                                                                    | ENSMUSG00000039953  |
| O88447 | Klc1     | 88646  | CLSTN1   | calsyntenin 1                                                                    | ENSG00000171603     |
| O88447 | Klc1     | 127944 | Kif5b    | kinesin family member 5B                                                         | ENSMUSG00000006740  |
| O88447 | Klc1     | 96711  | PABPC4   | poly(A) binding protein, cytoplasmic 4 (inducible form)                          | ENSG00000090621     |
| O88447 | Klc1     | 41200  | MAPK8IP1 | mitogen-activated protein kinase 8 interacting protein 1                         | ENSG00000121653     |
| O88447 | Klc1     | 208586 | Spa9     | sperm associated antigen 9                                                       | ENSMUSG00000020859  |
| O88447 | Klc1     | 148417 | Mapk8    | mitogen-activated protein kinase 8                                               | ENSMUSG00000021936  |
| O88447 | Klc1     | 172954 | App      | amyloid beta (A4) precursor protein                                              | ENSMUSG00000022892  |
| O88447 | Klc1     | 192264 | Mapk8ip1 | mitogen-activated protein kinase 8 interacting protein 1                         | ENSMUSG00000027223  |
| O88447 | Klc1     | 168641 | A1428936 | expressed sequence A1428936                                                      | ENSMUSG00000019737  |
| O88447 | Klc1     | 130893 | Klc2     | kinesin light chain 2                                                            | ENSMUSG00000024862  |
| O88447 | Klc1     | 211346 | Hap1     | huntingtin-associated protein 1                                                  | ENSMUSG00000006930  |
| O88447 | Klc1     | 47783  | FAT1     | FAT tumor suppressor homolog 1 (Drosophila)                                      | ENSG00000083857     |
| O88447 | Klc1     | 59405  | SPAG9    | sperm associated antigen 9                                                       | ENSG00000008294     |
| Q92027 | Klf5     | 128365 | Lyn      | Yamaguchi sarcoma viral (v-yes-1) oncogene homolog                               | ENSMUSG00000042228  |
| Q92027 | Klf5     | 178408 | Pou5f1   | POU domain, class 5, transcription factor 1                                      | ENSMUSG00000024406  |
| Q9J174 | Klhl1    | 78488  | TGFBR1   | transforming growth factor, beta receptor 1                                      | ENSG00000106799     |
| Q9J174 | Klhl1    | 30667  | BMPR1B   | bone morphogenetic protein receptor, type IB                                     | ENSG00000138696     |
| O08677 | Kng1     | 177150 | Enam     | enamelin                                                                         | ENSMUSG00000029286  |
| P52293 | Kpna2    | 192196 | Ifng     | interferon gamma                                                                 | ENSMUSG000000055170 |
| P52293 | Kpna2    | 210164 | Kpnb1    | karyopherin (importin) beta 1                                                    | ENSMUSG00000001440  |
| P52293 | Kpna2    | 33529  | LEF1     | lymphoid enhancer-binding factor 1                                               | ENSG00000138795     |
| P52293 | Kpna2    | 154154 | Pcyt1a   | phosphate cytidylyltransferase 1, choline, alpha isoform                         | ENSMUSG00000005615  |
| P52293 | Kpna2    | 178408 | Pou5f1   | POU domain, class 5, transcription factor 1                                      | ENSMUSG00000024406  |
| P52293 | Kpna2    | 141522 | Casp2    | caspace 2                                                                        | ENSMUSG00000029863  |
| Q9CXF0 | Kynu     | 196509 | Irf8     | interferon regulatory factor 8                                                   | ENSMUSG00000041515  |
| Q9JJK2 | Lanc12   | 175216 | Map2k5   | mitogen-activated protein kinase kinase 5                                        | ENSMUSG00000058444  |
| Q9JJK2 | Lanc12   | 200597 | Ywhae    | tyrosine 3-monooxygenase/tryptophan 5-monooxygenase                              | ENSMUSG00000020849  |
| P00342 | Ldhc     | 196509 | Irf8     | interferon regulatory factor 8                                                   | ENSMUSG00000041515  |
| Q07797 | Lqals3bp | 197036 | Stat2    | signal transducer and activator of transcription 2                               | ENSMUSG00000040033  |
| P61375 | Lhx5     | 171764 | Ldb1     | LIM domain binding 1                                                             | ENSMUSG00000025223  |
| P61375 | Lhx5     | 162180 | Ldb2     | LIM domain binding 2                                                             | ENSMUSG000000039706 |
| P97386 | Liq3     | 187207 | Tcfcp2l1 | transcription factor CP2-like 1                                                  | ENSMUSG00000026380  |
| P97386 | Liq3     | 178408 | Pou5f1   | POU domain, class 5, transcription factor 1                                      | ENSMUSG00000024406  |
| Q9QXD8 | Limd1    | 100280 | GF1      | growth factor independent 1 transcription repressor                              | ENSG00000162676     |
| Q9QXD8 | Limd1    | 193222 | Traf6    | TNF receptor-associated factor 6                                                 | ENSMUSG00000027164  |
| Q9QXD8 | Limd1    | 40102  | TRAF6    | TNF receptor-associated factor 6                                                 | ENSG00000175104     |
| P14733 | Lmnb1    | 198306 | Plcb2    | phospholipase C, beta 2                                                          | ENSMUSG00000040061  |
| P14733 | Lmnb1    | 160992 | Lmna     | lamin A                                                                          | ENSMUSG00000028063  |
| Q3TYD6 | Lmtk2    | 70546  | PPP1R2   | protein phosphatase 1, regulatory (inhibitor) subunit 2                          | ENSG00000184203     |
| Q8CGK3 | Lonp1    | 132183 | Irs2     | insulin receptor substrate 2                                                     | ENSMUSG00000038894  |
| Q60664 | Lrmp     | 198306 | Plcb2    | phospholipase C, beta 2                                                          | ENSMUSG00000040061  |
| P19973 | Lsp1     | 78880  | BMPR2    | bone morphogenetic protein receptor, type II (serine/threonine kinase)           | ENSG00000204217     |
| P19973 | Lsp1     | 158574 | Bmpr2    | bone morphogenetic protein receptor, type II (serine/threonine kinase)           | ENSMUSG00000067336  |
| P19973 | Lsp1     | 197628 | Sh3qlb1  | SH3-domain GRB2-like B1 (endophilin)                                             | ENSMUSG00000037062  |
| P19973 | Lsp1     | 173205 | Pdzrn3   | PDZ domain containing RING finger 3                                              | ENSMUSG00000035357  |

|        |          |        |          |                                                                    |                    |
|--------|----------|--------|----------|--------------------------------------------------------------------|--------------------|
| P19973 | Lsp1     | 271528 | Mos      | Moloney sarcoma oncogene                                           | ENSMUSG00000078365 |
| P19973 | Lsp1     | 149050 | Pmpca    | peptidase (mitochondrial processing) alpha                         | ENSMUSG00000026926 |
| P19973 | Lsp1     | 177408 | Twf1     | twinfilin, actin-binding protein, homolog 1 (Drosophila)           | ENSMUSG00000022451 |
| P19973 | Lsp1     | 198834 | Ccdc89   | coiled-coil domain containing 89                                   | ENSMUSG00000044362 |
| P19973 | Lsp1     | 165484 | Rabggta  | Rab geranylgeranyl transferase, a subunit                          | ENSMUSG00000040472 |
| P19973 | Lsp1     | 196604 | Foxc2    | forkhead box C2                                                    | ENSMUSG00000046714 |
| P19973 | Lsp1     | 127807 | Map3k8   | mitogen-activated protein kinase kinase kinase 8                   | ENSMUSG00000024235 |
| P19973 | Lsp1     | 191539 | Trpc1    | transient receptor potential cation channel, subfamily C, member 1 | ENSMUSG00000032839 |
| P08071 | Ltf      | 173713 | Cebpa    | CCAAT/enhancer binding protein (C/EBP), alpha                      | ENSMUSG00000034957 |
| P08071 | Ltf      | 162142 | Cebpe    | CCAAT/enhancer binding protein (C/EBP), epsilon                    | ENSMUSG00000052435 |
| Q9CQ33 | Lztr1    | 30667  | BMPR1B   | bone morphogenetic protein receptor, type IB                       | ENSG00000138696    |
| Q91YU6 | Lzts2    | 146254 | Traf2    | TNF receptor-associated factor 2                                   | ENSMUSG00000026942 |
| Q91YU6 | Lzts2    | 53956  | GSK3A    | glycogen synthase kinase 3 alpha                                   | ENSG00000105723    |
| Q91YU6 | Lzts2    | 18226  | PRKAA1   | protein kinase, AMP-activated, alpha 1 catalytic subunit           | ENSG00000132356    |
| Q91YU6 | Lzts2    | 51663  | GSK3B    | glycogen synthase kinase 3 beta                                    | ENSG00000082701    |
| Q9WVQ1 | Magi2    | 139653 | Dll1     | delta-like 1 (Drosophila)                                          | ENSMUSG00000014773 |
| Q9WVQ1 | Magi2    | 168425 | Acvr2a   | activin receptor IIA                                               | ENSMUSG00000052155 |
| Q9WVQ1 | Magi2    | 71761  | ACVR2A   | activin A receptor, type IIA                                       | ENSG00000121989    |
| Q6T264 | Maml1    | 149937 | Phf2     | PHD finger protein 2                                               | ENSMUSG00000038025 |
| Q6T264 | Maml1    | 172404 | Lass2    | LAG1 homolog, ceramide synthase 2                                  | ENSMUSG00000015714 |
| Q6T264 | Maml1    | 179104 | Tle6     | transducin-like enhancer of split 6, homolog of Drosophila         | ENSMUSG00000034758 |
| Q6T264 | Maml1    | 156458 | Ikbkg    | inhibitor of kappaB kinase gamma                                   | ENSMUSG00000004221 |
| Q6T264 | Maml1    | 172487 | Hdac10   | histone deacetylase 10                                             | ENSMUSG00000062906 |
| Q63932 | Map2k2   | 193200 | Nck1     | non-catalytic region of tyrosine kinase adaptor protein 1          | ENSMUSG00000032475 |
| Q63932 | Map2k2   | 156421 | Rgs12    | regulator of G-protein signaling 12                                | ENSMUSG00000029101 |
| Q63932 | Map2k2   | 44351  | BRAF     | v-raf murine sarcoma viral oncogene homolog B1                     | ENSG00000157764    |
| Q63932 | Map2k2   | 203299 | Ksr1     | kinase suppressor of ras 1                                         | ENSMUSG00000018334 |
| Q63932 | Map2k2   | 176099 | Map2k1   | mitogen-activated protein kinase kinase 1                          | ENSMUSG00000004936 |
| Q63932 | Map2k2   | 209781 | Mapk3    | mitogen-activated protein kinase 3                                 | ENSMUSG00000063065 |
| Q63932 | Map2k2   | 137672 | Mapk1    | mitogen-activated protein kinase 1                                 | ENSMUSG00000063358 |
| Q63932 | Map2k2   | 209641 | Csnk2a1  | casein kinase 2, alpha 1 polypeptide                               | ENSMUSG00000074698 |
| Q63932 | Map2k2   | 179428 | Raf1     | v-raf-leukemia viral oncogene 1                                    | ENSMUSG00000000441 |
| Q63932 | Map2k2   | 176847 | Mknk1    | MAP kinase-interacting serine/threonine kinase 1                   | ENSMUSG00000028708 |
| Q63932 | Map2k2   | 175279 | Mknk2    | MAP kinase-interacting serine/threonine kinase 2                   | ENSMUSG00000020190 |
| Q63932 | Map2k2   | 138657 | Braf     | Braf transforming gene                                             | ENSMUSG00000002413 |
| O09110 | Map2k3   | 178161 | Irak2    | interleukin-1 receptor-associated kinase 2                         | ENSMUSG00000060477 |
| O09110 | Map2k3   | 30667  | BMPR1B   | bone morphogenetic protein receptor, type IB                       | ENSG00000138696    |
| O09110 | Map2k3   | 3127   | SMAD2    | SMAD family member 2                                               | ENSG00000175387    |
| O09110 | Map2k3   | 28871  | SMURF1   | SMAD specific E3 ubiquitin protein ligase 1                        | ENSG00000198742    |
| O09110 | Map2k3   | 3485   | SMAD4    | SMAD family member 4                                               | ENSG00000141646    |
| O09110 | Map2k3   | 18366  | SMAD3    | SMAD family member 3                                               | ENSG00000166949    |
| O09110 | Map2k3   | 78488  | TGFBR1   | transforming growth factor, beta receptor 1                        | ENSG00000106799    |
| Q60700 | Map3k12  | 192264 | Mapk8ip1 | mitogen-activated protein kinase 8 interacting protein 1           | ENSMUSG00000027223 |
| Q61084 | Map3k3   | 132298 | Rela     | v-rel reticuloendotheliosis viral oncogene homolog A (avian)       | ENSMUSG00000024927 |
| Q61084 | Map3k3   | 140708 | Nfkbia   | nuclear factor of kappa light polypeptide gene enhancer in B-cells | ENSMUSG00000021025 |
| Q61084 | Map3k3   | 141021 | Ikkbk    | inhibitor of kappaB kinase beta                                    | ENSMUSG00000031537 |
| Q61084 | Map3k3   | 169132 | Chuk     | conserved helix-loop-helix ubiquitous kinase                       | ENSMUSG00000025199 |
| Q61084 | Map3k3   | 267041 | Psmc3    | proteasome (prosome, macropain) 28 subunit, 3                      | ENSMUSG00000078652 |
| Q61084 | Map3k3   | 175216 | Map2k5   | mitogen-activated protein kinase kinase 5                          | ENSMUSG00000058444 |
| Q61084 | Map3k3   | 193222 | Traf6    | TNF receptor-associated factor 6                                   | ENSMUSG00000027164 |
| Q61084 | Map3k3   | 10062  | TRAF7    | TNF receptor-associated factor 7                                   | ENSG00000131653    |
| Q61084 | Map3k3   | 18592  | MAP2K5   | mitogen-activated protein kinase kinase 5                          | ENSG00000137764    |
| Q61084 | Map3k3   | 94374  | MAP3K7   | mitogen-activated protein kinase kinase kinase 7                   | ENSG00000135341    |
| Q61084 | Map3k3   | 132962 | Map3k7   | mitogen-activated protein kinase kinase kinase 7                   | ENSMUSG00000028284 |
| Q61084 | Map3k3   | 143710 | Ripk1    | receptor (TNFRSF)-interacting serine-threonine kinase 1            | ENSMUSG00000021408 |
| Q61084 | Map3k3   | 26317  | KRIT1    | KRIT1, ankyrin repeat containing                                   | ENSG00000001631    |
| Q61084 | Map3k3   | 15466  | CCM2     | cerebral cavernous malformation 2                                  | ENSG00000136280    |
| Q61084 | Map3k3   | 168358 | Sqstm1   | sequestosome 1                                                     | ENSMUSG00000015837 |
| Q61084 | Map3k3   | 61811  | SQSTM1   | sequestosome 1                                                     | ENSG00000161011    |
| O54992 | Mapkapk5 | 23058  | HSPB1    | heat shock 27kDa protein 1                                         | ENSG00000106211    |
| O54992 | Mapkapk5 | 191036 | Trp53    | transformation related protein 53                                  | ENSMUSG00000059552 |
| Q8VCF0 | Mavs     | 173742 | Tank     | TRAF family member-associated Nf-kappa B activator                 | ENSMUSG00000064289 |
| Q8VCF0 | Mavs     | 137824 | Eya4     | eyes absent 4 homolog (Drosophila)                                 | ENSMUSG00000010461 |
| Q8VCF0 | Mavs     | 172558 | Traf3    | TNF receptor-associated factor 3                                   | ENSMUSG00000021277 |
| Q8VCF0 | Mavs     | 203813 | Mfn2     | mitofusin 2                                                        | ENSMUSG00000029020 |
| Q8VCF0 | Mavs     | 36010  | TRADD    | TNFRSF1A-associated via death domain                               | ENSG00000102871    |
| Q8VCF0 | Mavs     | 197203 | Trafd1   | TRAF type zinc finger domain containing 1                          | ENSMUSG00000042726 |
| Q8VCF0 | Mavs     | 135957 | Ddx58    | DEAD (Asp-Glu-Ala-Asp) box polypeptide 58                          | ENSMUSG00000040296 |
| Q8VCF0 | Mavs     | 174129 | Ifih1    | interferon induced with helicase C domain 1                        | ENSMUSG00000026896 |
| P56671 | Maz      | 157336 | Dcc      | deleted in colorectal carcinoma                                    | ENSMUSG00000060534 |
| P49718 | Mcm5     | 189829 | Mcm6     | minichromosome maintenance deficient 6 (MIS5 homolog)              | ENSMUSG00000026355 |
| P49718 | Mcm5     | 167535 | Mcm2     | minichromosome maintenance deficient 2 mitotin (S. cerevisiae)     | ENSMUSG00000002870 |
| P49718 | Mcm5     | 135657 | Mcm4     | minichromosome maintenance deficient 4 homolog (S. cerevisiae)     | ENSMUSG00000022673 |
| P49718 | Mcm5     | 205861 | Mcm7     | minichromosome maintenance deficient 7 (S. cerevisiae)             | ENSMUSG00000029730 |
| P49718 | Mcm5     | 136642 | Mcm3     | minichromosome maintenance deficient 3 (S. cerevisiae)             | ENSMUSG00000041859 |
| P49718 | Mcm5     | 95078  | RPA2     | replication protein A2, 32kDa                                      | ENSG00000117748    |
| P49718 | Mcm5     | 177097 | Orc6     | origin recognition complex, subunit 6                              | ENSMUSG00000031697 |
| P49718 | Mcm5     | 186454 | Cdc7     | cell division cycle 7 (S. cerevisiae)                              | ENSMUSG00000029283 |
| P49718 | Mcm5     | 156912 | Orc2     | origin recognition complex, subunit 2                              | ENSMUSG00000026037 |
| Q0PMG2 | Mdga1    | 175763 | Tal1     | T-cell acute lymphocytic leukemia 1                                | ENSMUSG00000028717 |
| Q6PGF3 | Med16    | 211539 | Kat2a    | K(lysine) acetyltransferase 2A                                     | ENSMUSG00000020918 |
| Q6PGF3 | Med16    | 205939 | Tada2a   | transcriptional adaptor 2A                                         | ENSMUSG00000018651 |
| Q6PGF3 | Med16    | 132631 | Atxn7    | ataxin 7                                                           | ENSMUSG00000021738 |
| Q6PGF3 | Med16    | 134374 | Atxn7l1  | ataxin 7-like 1                                                    | ENSMUSG00000020564 |
| Q6PGF3 | Med16    | 212566 | Atxn7l3  | ataxin 7-like 3                                                    | ENSMUSG00000059995 |
| Q6PGF3 | Med16    | 208472 | Csrp2bp  | cysteine and glycine-rich protein 2 binding protein                | ENSMUSG00000027425 |
| Q6PGF3 | Med16    | 141131 | Mbip     | MAP3K12 binding inhibitory protein 1                               | ENSMUSG00000021028 |
| Q6PGF3 | Med16    | 210500 | Med1     | mediator complex subunit 1                                         | ENSMUSG00000018160 |
| Q6PGF3 | Med16    | 253359 | Med12    | mediator of RNA polymerase II transcription, subunit 12            | ENSMUSG00000079487 |

|        |       |        |         |                                                              |                     |
|--------|-------|--------|---------|--------------------------------------------------------------|---------------------|
| Q6PGF3 | Med16 | 206853 | Med13   | mediator complex subunit 13                                  | ENSMUSG00000034297  |
| Q6PGF3 | Med16 | 132282 | Med14   | mediator complex subunit 14                                  | ENSMUSG000000064127 |
| Q6PGF3 | Med16 | 139947 | Med15   | mediator complex subunit 15                                  | ENSMUSG00000012114  |
| Q6PGF3 | Med16 | 135069 | Med17   | mediator complex subunit 17                                  | ENSMUSG00000031935  |
| Q6PGF3 | Med16 | 194008 | Med18   | mediator of RNA polymerase II transcription, subunit 18 H    | ENSMUSG00000066042  |
| Q6PGF3 | Med16 | 198395 | Med21   | mediator complex subunit 21                                  | ENSMUSG00000030291  |
| Q6PGF3 | Med16 | 139123 | Med23   | mediator complex subunit 23                                  | ENSMUSG00000019984  |
| Q6PGF3 | Med16 | 210636 | Med24   | mediator complex subunit 24                                  | ENSMUSG00000017210  |
| Q6PGF3 | Med16 | 168279 | Med26   | mediator complex subunit 26                                  | ENSMUSG00000045248  |
| Q6PGF3 | Med16 | 153778 | Med27   | mediator complex subunit 27                                  | ENSMUSG00000026799  |
| Q6PGF3 | Med16 | 162461 | Med28   | mediator of RNA polymerase II transcription, subunit 28 H    | ENSMUSG00000015804  |
| Q6PGF3 | Med16 | 196398 | Med31   | mediator of RNA polymerase II transcription, subunit 31 H    | ENSMUSG00000020801  |
| Q6PGF3 | Med16 | 180055 | Med4    | mediator of RNA polymerase II transcription, subunit 4 H     | ENSMUSG00000022109  |
| Q6PGF3 | Med16 | 154516 | Med6    | mediator of RNA polymerase II transcription, subunit 6 H     | ENSMUSG00000002679  |
| Q6PGF3 | Med16 | 181342 | Med8    | mediator of RNA polymerase II transcription, subunit 8 H     | ENSMUSG00000006392  |
| Q6PGF3 | Med16 | 187799 | Dr1     | down-regulator of transcription 1                            | ENSMUSG00000029265  |
| Q6PGF3 | Med16 | 191826 | Polr2a  | polymerase (RNA) II (DNA directed) polypeptide A             | ENSMUSG00000005198  |
| Q6PGF3 | Med16 | 174132 | Polr2b  | polymerase (RNA) II (DNA directed) polypeptide B             | ENSMUSG00000029250  |
| Q6PGF3 | Med16 | 209697 | Ccdc101 | coiled-coil domain containing 101                            | ENSMUSG00000030714  |
| Q6PGF3 | Med16 | 209007 | Spata20 | spermatogenesis associated 20                                | ENSMUSG00000020867  |
| Q6PGF3 | Med16 | 207998 | Sptlc3  | serine palmitoyltransferase, long chain base subunit 3       | ENSMUSG00000039092  |
| Q6PGF3 | Med16 | 203046 | Tada1   | transcriptional adaptor 1                                    | ENSMUSG00000026563  |
| Q6PGF3 | Med16 | 176433 | Tada3   | transcriptional adaptor 3                                    | ENSMUSG00000048930  |
| Q6PGF3 | Med16 | 204983 | Taf10   | TAF10 RNA polymerase II, TATA box binding protein (TBP)      | ENSMUSG00000043866  |
| Q6PGF3 | Med16 | 193751 | Taf12   | TAF12 RNA polymerase II, TATA box binding protein (TBP)      | ENSMUSG00000028899  |
| Q6PGF3 | Med16 | 199943 | Taf5l   | TAF5-like RNA polymerase II, p300/CBP-associated factor      | ENSMUSG00000038697  |
| Q6PGF3 | Med16 | 140953 | Taf6l   | TAF6-like RNA polymerase II, p300/CBP-associated factor      | ENSMUSG00000036800  |
| Q6PGF3 | Med16 | 178346 | Taf9    | TAF9 RNA polymerase II, TATA box binding protein (TBP)       | ENSMUSG00000052293  |
| Q6PGF3 | Med16 | 208186 | Trrap   | transformation/transcription domain-associated protein       | ENSMUSG00000045482  |
| Q6PGF3 | Med16 | 182297 | Usp22   | ubiquitin specific peptidase 22                              | ENSMUSG000000042506 |
| Q6PGF3 | Med16 | 151154 | Wdr5    | WD repeat domain 5                                           | ENSMUSG00000026917  |
| Q6PGF3 | Med16 | 143426 | Yeats2  | YEATS domain containing 2                                    | ENSMUSG00000041215  |
| Q6PGF3 | Med16 | 200277 | Zzz3    | zinc finger, ZZ domain containing 3                          | ENSMUSG00000039068  |
| Q6PGF3 | Med16 | 186515 | Atxn7l2 | ataxin 7-like 2                                              | ENSMUSG00000048997  |
| Q6PGF3 | Med16 | 606312 | Med20   | mediator complex subunit 20                                  | ENSMUSG000000092558 |
| Q6PGF3 | Med16 | 132298 | Rela    | v-rel reticuloendotheliosis viral oncogene homolog A (avian) | ENSMUSG00000024927  |
| Q6PGF3 | Med16 | 191036 | Trp53   | transformation related protein 53                            | ENSMUSG00000059552  |
| Q6PGF3 | Med16 | 207256 | Mixl1   | Mix1 homeobox-like 1 (Xenopus laevis)                        | ENSMUSG00000026497  |
| Q6PGF3 | Med16 | 163580 | Ssbp4   | single stranded DNA binding protein 4                        | ENSMUSG00000070003  |
| Q6PGF3 | Med16 | 166495 | Nkd2    | naked cuticle 2 homolog (Drosophila)                         | ENSMUSG00000021567  |
| Q6PGF3 | Med16 | 213181 | Zfp64   | zinc finger protein 64                                       | ENSMUSG00000027551  |
| Q6PGF3 | Med16 | 159268 | Esrrb   | estrogen related receptor, beta                              | ENSMUSG00000021255  |
| Q6PGF3 | Med16 | 170763 | Ssbp3   | single-stranded DNA binding protein 3                        | ENSMUSG00000061887  |
| Q6PGF3 | Med16 | 206900 | Trp73   | transformation related protein 73                            | ENSMUSG00000029026  |
| Q6PGF3 | Med16 | 181192 | Per2    | period homolog 2 (Drosophila)                                | ENSMUSG000000055866 |
| Q6PGF3 | Med16 | 168206 | Zbtb22  | zinc finger and BTB domain containing 22                     | ENSMUSG00000051390  |
| Q6PGF3 | Med16 | 174161 | Tcf3    | transcription factor 3                                       | ENSMUSG00000020167  |
| Q6PGF3 | Med16 | 144115 | Ewsr1   | Ewing sarcoma breakpoint region 1                            | ENSMUSG00000009079  |
| Q6PGF3 | Med16 | 171712 | Pml     | promyelocytic leukemia                                       | ENSMUSG00000036986  |
| Q6PGF3 | Med16 | 204739 | Tardbp  | TAR DNA binding protein                                      | ENSMUSG000000041459 |
| Q6PGF3 | Med16 | 157578 | Rbfox2  | RNA binding protein, fox-1 homolog (C. elegans) 2            | ENSMUSG00000033565  |
| Q6PGF3 | Med16 | 192631 | Alx4    | aristaless-like homeobox 4                                   | ENSMUSG00000040310  |
| Q6PGF3 | Med16 | 135792 | Tnfrsf3 | tumor necrosis factor, alpha-induced protein 3               | ENSMUSG00000019850  |
| Q6PGF3 | Med16 | 213820 | Gata5   | GATA binding protein 5                                       | ENSMUSG00000015627  |
| Q9DB40 | Med27 | 211539 | Kat2a   | K(lysine) acetyltransferase 2A                               | ENSMUSG00000020918  |
| Q9DB40 | Med27 | 205939 | Tada2a  | transcriptional adaptor 2A                                   | ENSMUSG00000018651  |
| Q9DB40 | Med27 | 132631 | Atxn7   | ataxin 7                                                     | ENSMUSG00000021738  |
| Q9DB40 | Med27 | 134374 | Atxn7l1 | ataxin 7-like 1                                              | ENSMUSG00000020564  |
| Q9DB40 | Med27 | 212566 | Atxn7l3 | ataxin 7-like 3                                              | ENSMUSG00000059995  |
| Q9DB40 | Med27 | 208472 | Csrp2bp | cysteine and glycine-rich protein 2 binding protein          | ENSMUSG00000027425  |
| Q9DB40 | Med27 | 141131 | Mbip    | MAP3K12 binding inhibitory protein 1                         | ENSMUSG00000021028  |
| Q9DB40 | Med27 | 210500 | Med1    | mediator complex subunit 1                                   | ENSMUSG00000018160  |
| Q9DB40 | Med27 | 253359 | Med12   | mediator of RNA polymerase II transcription, subunit 12 H    | ENSMUSG00000079487  |
| Q9DB40 | Med27 | 206853 | Med13   | mediator complex subunit 13                                  | ENSMUSG00000034297  |
| Q9DB40 | Med27 | 132282 | Med14   | mediator complex subunit 14                                  | ENSMUSG000000064127 |
| Q9DB40 | Med27 | 139947 | Med15   | mediator complex subunit 15                                  | ENSMUSG00000012114  |
| Q9DB40 | Med27 | 171451 | Med16   | mediator complex subunit 16                                  | ENSMUSG00000013833  |
| Q9DB40 | Med27 | 135069 | Med17   | mediator complex subunit 17                                  | ENSMUSG00000031935  |
| Q9DB40 | Med27 | 194008 | Med18   | mediator of RNA polymerase II transcription, subunit 18 H    | ENSMUSG00000066042  |
| Q9DB40 | Med27 | 198395 | Med21   | mediator complex subunit 21                                  | ENSMUSG00000030291  |
| Q9DB40 | Med27 | 139123 | Med23   | mediator complex subunit 23                                  | ENSMUSG00000019984  |
| Q9DB40 | Med27 | 210636 | Med24   | mediator complex subunit 24                                  | ENSMUSG00000017210  |
| Q9DB40 | Med27 | 168279 | Med26   | mediator complex subunit 26                                  | ENSMUSG00000045248  |
| Q9DB40 | Med27 | 162461 | Med28   | mediator of RNA polymerase II transcription, subunit 28 H    | ENSMUSG00000015804  |
| Q9DB40 | Med27 | 196398 | Med31   | mediator of RNA polymerase II transcription, subunit 31 H    | ENSMUSG00000020801  |
| Q9DB40 | Med27 | 180055 | Med4    | mediator of RNA polymerase II transcription, subunit 4 H     | ENSMUSG00000022109  |
| Q9DB40 | Med27 | 154516 | Med6    | mediator of RNA polymerase II transcription, subunit 6 H     | ENSMUSG00000002679  |
| Q9DB40 | Med27 | 181342 | Med8    | mediator of RNA polymerase II transcription, subunit 8 H     | ENSMUSG00000006392  |
| Q9DB40 | Med27 | 187799 | Dr1     | down-regulator of transcription 1                            | ENSMUSG00000029265  |
| Q9DB40 | Med27 | 191826 | Polr2a  | polymerase (RNA) II (DNA directed) polypeptide A             | ENSMUSG00000005198  |
| Q9DB40 | Med27 | 174132 | Polr2b  | polymerase (RNA) II (DNA directed) polypeptide B             | ENSMUSG00000029250  |
| Q9DB40 | Med27 | 209697 | Ccdc101 | coiled-coil domain containing 101                            | ENSMUSG00000030714  |
| Q9DB40 | Med27 | 209007 | Spata20 | spermatogenesis associated 20                                | ENSMUSG00000020867  |
| Q9DB40 | Med27 | 207998 | Sptlc3  | serine palmitoyltransferase, long chain base subunit 3       | ENSMUSG00000039092  |
| Q9DB40 | Med27 | 203046 | Tada1   | transcriptional adaptor 1                                    | ENSMUSG00000026563  |
| Q9DB40 | Med27 | 176433 | Tada3   | transcriptional adaptor 3                                    | ENSMUSG00000048930  |
| Q9DB40 | Med27 | 204983 | Taf10   | TAF10 RNA polymerase II, TATA box binding protein (TBP)      | ENSMUSG00000043866  |
| Q9DB40 | Med27 | 193751 | Taf12   | TAF12 RNA polymerase II, TATA box binding protein (TBP)      | ENSMUSG00000028899  |
| Q9DB40 | Med27 | 199943 | Taf5l   | TAF5-like RNA polymerase II, p300/CBP-associated factor      | ENSMUSG00000038697  |

|        |        |        |         |                                                            |                      |
|--------|--------|--------|---------|------------------------------------------------------------|----------------------|
| Q9DB40 | Med27  | 140953 | Taf6l   | TAF6-like RNA polymerase II, p300/CBP-associated factor    | ENSMUSG00000003680   |
| Q9DB40 | Med27  | 178346 | Taf9    | TAF9 RNA polymerase II, TATA box binding protein (TBP)-    | ENSMUSG00000005293   |
| Q9DB40 | Med27  | 208186 | Trrap   | transformation/transcription domain-associated protein     | ENSMUSG00000004582   |
| Q9DB40 | Med27  | 182297 | Usp22   | ubiquitin specific peptidase 22                            | ENSMUSG000000042506  |
| Q9DB40 | Med27  | 151154 | Wdr5    | WD repeat domain 5                                         | ENSMUSG000000026917  |
| Q9DB40 | Med27  | 143426 | Yeats2  | YEATS domain containing 2                                  | ENSMUSG000000041215  |
| Q9DB40 | Med27  | 200277 | Zzz3    | zinc finger, ZZ domain containing 3                        | ENSMUSG000000039068  |
| Q9DB40 | Med27  | 186515 | Atxn7l2 | ataxin 7-like 2                                            | ENSMUSG000000048997  |
| Q9DB40 | Med27  | 606312 | Med20   | mediator complex subunit 20                                | ENSMUSG000000092558  |
| Q9DB40 | Med27  | 159268 | Esrrb   | estrogen related receptor, beta                            | ENSMUSG000000021255  |
| Q9CQA5 | Med4   | 211539 | Kat2a   | K(lysine) acetyltransferase 2A                             | ENSMUSG000000020918  |
| Q9CQA5 | Med4   | 205939 | Tada2a  | transcriptional adaptor 2A                                 | ENSMUSG000000018651  |
| Q9CQA5 | Med4   | 132631 | Atxn7   | ataxin 7                                                   | ENSMUSG000000021738  |
| Q9CQA5 | Med4   | 134374 | Atxn7l1 | ataxin 7-like 1                                            | ENSMUSG000000020564  |
| Q9CQA5 | Med4   | 212566 | Atxn7l3 | ataxin 7-like 3                                            | ENSMUSG000000059995  |
| Q9CQA5 | Med4   | 208472 | Csrp2bp | cysteine and glycine-rich protein 2 binding protein        | ENSMUSG000000027425  |
| Q9CQA5 | Med4   | 141131 | Mbip    | MAP3K12 binding inhibitory protein 1                       | ENSMUSG000000021028  |
| Q9CQA5 | Med4   | 210500 | Med1    | mediator complex subunit 1                                 | ENSMUSG000000018160  |
| Q9CQA5 | Med4   | 253359 | Med12   | mediator of RNA polymerase II transcription, subunit 12 H  | ENSMUSG000000079487  |
| Q9CQA5 | Med4   | 206853 | Med13   | mediator complex subunit 13                                | ENSMUSG000000034297  |
| Q9CQA5 | Med4   | 132282 | Med14   | mediator complex subunit 14                                | ENSMUSG000000064127  |
| Q9CQA5 | Med4   | 139947 | Med15   | mediator complex subunit 15                                | ENSMUSG000000012114  |
| Q9CQA5 | Med4   | 171451 | Med16   | mediator complex subunit 16                                | ENSMUSG000000013833  |
| Q9CQA5 | Med4   | 135069 | Med17   | mediator complex subunit 17                                | ENSMUSG000000031935  |
| Q9CQA5 | Med4   | 194008 | Med18   | mediator of RNA polymerase II transcription, subunit 18 H  | ENSMUSG000000066042  |
| Q9CQA5 | Med4   | 198395 | Med21   | mediator complex subunit 21                                | ENSMUSG000000030291  |
| Q9CQA5 | Med4   | 139123 | Med23   | mediator complex subunit 23                                | ENSMUSG000000019984  |
| Q9CQA5 | Med4   | 210636 | Med24   | mediator complex subunit 24                                | ENSMUSG000000017210  |
| Q9CQA5 | Med4   | 168279 | Med26   | mediator complex subunit 26                                | ENSMUSG000000045248  |
| Q9CQA5 | Med4   | 153778 | Med27   | mediator complex subunit 27                                | ENSMUSG000000026799  |
| Q9CQA5 | Med4   | 162461 | Med28   | mediator of RNA polymerase II transcription, subunit 28 H  | ENSMUSG000000015804  |
| Q9CQA5 | Med4   | 196398 | Med31   | mediator of RNA polymerase II transcription, subunit 31 H  | ENSMUSG000000020801  |
| Q9CQA5 | Med4   | 154516 | Med6    | mediator of RNA polymerase II transcription, subunit 6 H   | ENSMUSG000000002679  |
| Q9CQA5 | Med4   | 181342 | Med8    | mediator of RNA polymerase II transcription, subunit 8 H   | ENSMUSG000000006392  |
| Q9CQA5 | Med4   | 187799 | Dr1     | down-regulator of transcription 1                          | ENSMUSG000000029265  |
| Q9CQA5 | Med4   | 191826 | Polr2a  | polymerase (RNA) II (DNA directed) polypeptide A           | ENSMUSG000000051198  |
| Q9CQA5 | Med4   | 174132 | Polr2b  | polymerase (RNA) II (DNA directed) polypeptide B           | ENSMUSG000000029250  |
| Q9CQA5 | Med4   | 209697 | Ccdc101 | coiled-coil domain containing 101                          | ENSMUSG000000030714  |
| Q9CQA5 | Med4   | 209007 | Spata20 | spermatogenesis associated 20                              | ENSMUSG000000020867  |
| Q9CQA5 | Med4   | 207998 | Sptlc3  | serine palmitoyltransferase, long chain base subunit 3     | ENSMUSG000000039092  |
| Q9CQA5 | Med4   | 203046 | Tada1   | transcriptional adaptor 1                                  | ENSMUSG000000026563  |
| Q9CQA5 | Med4   | 176433 | Tada3   | transcriptional adaptor 3                                  | ENSMUSG0000000048930 |
| Q9CQA5 | Med4   | 204983 | Taf10   | TAF10 RNA polymerase II, TATA box binding protein (TBP)    | ENSMUSG0000000043866 |
| Q9CQA5 | Med4   | 193751 | Taf12   | TAF12 RNA polymerase II, TATA box binding protein (TBP)    | ENSMUSG000000028899  |
| Q9CQA5 | Med4   | 199943 | Taf5l   | TAF5-like RNA polymerase II, p300/CBP-associated factor    | ENSMUSG000000038697  |
| Q9CQA5 | Med4   | 140953 | Taf6l   | TAF6-like RNA polymerase II, p300/CBP-associated factor    | ENSMUSG00000003680   |
| Q9CQA5 | Med4   | 178346 | Taf9    | TAF9 RNA polymerase II, TATA box binding protein (TBP)-    | ENSMUSG00000005293   |
| Q9CQA5 | Med4   | 208186 | Trrap   | transformation/transcription domain-associated protein     | ENSMUSG00000004582   |
| Q9CQA5 | Med4   | 182297 | Usp22   | ubiquitin specific peptidase 22                            | ENSMUSG000000042506  |
| Q9CQA5 | Med4   | 151154 | Wdr5    | WD repeat domain 5                                         | ENSMUSG000000026917  |
| Q9CQA5 | Med4   | 143426 | Yeats2  | YEATS domain containing 2                                  | ENSMUSG000000041215  |
| Q9CQA5 | Med4   | 200277 | Zzz3    | zinc finger, ZZ domain containing 3                        | ENSMUSG000000039068  |
| Q9CQA5 | Med4   | 186515 | Atxn7l2 | ataxin 7-like 2                                            | ENSMUSG000000048997  |
| Q9CQA5 | Med4   | 606312 | Med20   | mediator complex subunit 20                                | ENSMUSG000000092558  |
| Q9CQA5 | Med4   | 159268 | Esrrb   | estrogen related receptor, beta                            | ENSMUSG000000021255  |
| Q60929 | Mef2a  | 179042 | Hdac7   | histone deacetylase 7                                      | ENSMUSG000000022475  |
| Q60929 | Mef2a  | 150644 | Ckm     | creatine kinase, muscle                                    | ENSMUSG000000030399  |
| Q60929 | Mef2a  | 195149 | Eno3    | enolase 3, beta muscle                                     | ENSMUSG000000060600  |
| Q60929 | Mef2a  | 159056 | Smad2   | MAD homolog 2 (Drosophila)                                 | ENSMUSG000000024563  |
| Q8CFN5 | Mef2c  | 140748 | Carm1   | coactivator-associated arginine methyltransferase 1        | ENSMUSG000000032185  |
| Q8CFN5 | Mef2c  | 136330 | Ifrd1   | interferon-related developmental regulator 1               | ENSMUSG00000001627   |
| Q8CFN5 | Mef2c  | 212832 | Ncoa3   | nuclear receptor coactivator 3                             | ENSMUSG000000027678  |
| Q8CFN5 | Mef2c  | 133993 | Ncoa2   | nuclear receptor coactivator 2                             | ENSMUSG000000005886  |
| Q60805 | Mertk  | 78880  | BMPR2   | bone morphogenetic protein receptor, type II (serine/thre  | ENSG000000204217     |
| Q60805 | Mertk  | 145653 | Nbea    | neurobeachin                                               | ENSMUSG000000027799  |
| Q60805 | Mertk  | 180668 | Ces1d   | carboxylesterase 1D                                        | ENSMUSG000000056973  |
| Q60805 | Mertk  | 127807 | Map3k8  | mitogen-activated protein kinase kinase kinase 8           | ENSMUSG000000024235  |
| Q60805 | Mertk  | 149582 | Msr1    | macrophage scavenger receptor 1                            | ENSMUSG000000025044  |
| Q60805 | Mertk  | 195070 | Plcg2   | phospholipase C, gamma 2                                   | ENSMUSG000000034330  |
| Q60805 | Mertk  | 178868 | Pik3r1  | phosphatidylinositol 3-kinase, regulatory subunit, polypep | ENSMUSG000000041417  |
| Q60805 | Mertk  | 133881 | Pik3cg  | phosphoinositide-3-kinase, catalytic, gamma polypeptide    | ENSMUSG000000020573  |
| Q60805 | Mertk  | 158574 | Bmpr2   | bone morphogenic protein receptor, type II (serine/thre    | ENSMUSG000000067336  |
| P16056 | Met    | 171147 | Gab1    | growth factor receptor bound protein 2-associated protein  | ENSMUSG000000031714  |
| P16056 | Met    | 24150  | HGF     | hepatocyte growth factor (hepapoietin A; scatter factor)   | ENSG00000019991      |
| P16056 | Met    | 214339 | Grb2    | growth factor receptor bound protein 2                     | ENSMUSG000000059923  |
| P16056 | Met    | 32481  | PLXNB1  | plexin B1                                                  | ENSG000000164050     |
| Q80U63 | Mfn2   | 207066 | Mavs    | mitochondrial antiviral signaling protein                  | ENSMUSG000000037523  |
| Q80U63 | Mfn2   | 136722 | Mfn1    | mitofusin 1                                                | ENSMUSG000000027668  |
| Q8VDP3 | Mical1 | 159635 | Stk38   | serine/threonine kinase 38                                 | ENSMUSG000000024006  |
| Q8VDP3 | Mical1 | 77184  | STK4    | serine/threonine kinase 4                                  | ENSG000000101109     |
| Q8VDP3 | Mical1 | 131376 | Flnb    | filamin, beta                                              | ENSMUSG000000025278  |
| Q8VDP3 | Mical1 | 210090 | 39691   | septin 1                                                   | ENSMUSG000000000486  |
| Q8K436 | Mkl1   | 87849  | SRF     | serum response factor (c-fos serum response element-bi     | ENSG000000112658     |
| Q8K436 | Mkl1   | 166617 | Lhx2    | LIM homeobox protein 2                                     | ENSMUSG000000000247  |
| Q9QWV4 | Mif1   | 148477 | Nrbp1   | nuclear receptor binding protein 1                         | ENSMUSG000000029148  |
| Q9QWV4 | Mif1   | 135418 | Ywhaz   | tyrosine 3-monooxygenase/tryptophan 5-monooxygenase        | ENSMUSG000000022285  |
| Q9QWV4 | Mif1   | 176947 | Ncl     | nucleolin                                                  | ENSMUSG000000026234  |
| Q9QWV4 | Mif1   | 201111 | Cacybp  | calcylin binding protein                                   | ENSMUSG000000014226  |
| Q9QWV4 | Mif1   | 138056 | Eif3q   | eukaryotic translation initiation factor 3, subunit G      | ENSMUSG000000070319  |

|        |       |        |           |                                                                              |                     |
|--------|-------|--------|-----------|------------------------------------------------------------------------------|---------------------|
| Q9QWV4 | Mif1  | 207851 | Dynll2    | dynein light chain LC8-type 2                                                | ENSMUSG00000020483  |
| A2AM29 | Mltf3 | 131964 | Bcor      | BCL6 interacting corepressor                                                 | ENSMUSG00000040363  |
| A2AM29 | Mltf3 | 148014 | Hoxa9     | homeobox A9                                                                  | ENSMUSG00000038227  |
| Q91V27 | Mlph  | 184264 | Rab27a    | RAB27A, member RAS oncogene family                                           | ENSMUSG00000032202  |
| Q91V27 | Mlph  | 164008 | Rab3a     | RAB3A, member RAS oncogene family                                            | ENSMUSG00000031840  |
| Q91V27 | Mlph  | 156998 | Rab27b    | RAB27b, member RAS oncogene family                                           | ENSMUSG00000024511  |
| Q2VPU4 | Mlxip | 211822 | Mlx       | MAX-like protein X                                                           | ENSMUSG00000017801  |
| Q9D071 | Mms19 | 189502 | Nfe2      | nuclear factor, erythroid derived 2                                          | ENSMUSG00000058794  |
| Q9D071 | Mms19 | 144115 | Ewsr1     | Ewing sarcoma breakpoint region 1                                            | ENSMUSG00000009079  |
| Q9D071 | Mms19 | 161506 | Maff      | v-maf musculoaponeurotic fibrosarcoma oncogene family,                       | ENSMUSG000000042622 |
| Q8K396 | Mnd1  | 198884 | Rad51     | RAD51 homolog (S. cerevisiae)                                                | ENSMUSG00000027323  |
| Q8K396 | Mnd1  | 211834 | Psmc3ip   | proteasome (prosome, macropain) 26S subunit, ATPase 3                        | ENSMUSG00000019303  |
| Q61830 | Mrc1  | 171427 | Btk       | Bruton agammaglobulinemia tyrosine kinase                                    | ENSMUSG00000031264  |
| Q61830 | Mrc1  | 256772 | Clec7a    | C-type lectin domain family 7, member a                                      | ENSMUSG00000079293  |
| Q61830 | Mrc1  | 206881 | Siglec1   | sialic acid binding Ig-like lectin 1, sialoadhesin                           | ENSMUSG00000027322  |
| Q61830 | Mrc1  | 195821 | Ptpnc     | protein tyrosine phosphatase, receptor type, C                               | ENSMUSG00000026395  |
| P43247 | Msh2  | 187207 | Tcfcp2l1  | transcription factor CP2-like 1                                              | ENSMUSG00000026380  |
| P43247 | Msh2  | 178408 | Pou5f1    | POU domain, class 5, transcription factor 1                                  | ENSMUSG00000024406  |
| O08689 | Mstn  | 59338  | WFIKKN2   | WAP, follistatin/kazal, immunoglobulin, kunitz and netrin                    | ENSG00000173714     |
| O08689 | Mstn  | 7799   | WFIKKN1   | WAP, follistatin/kazal, immunoglobulin, kunitz and netrin                    | ENSG00000127578     |
| O08689 | Mstn  | 208814 | Wfikkn2   | WAP, follistatin/kazal, immunoglobulin, kunitz and netrin                    | ENSMUSG00000044177  |
| Q8BJ58 | Mtbp  | 191852 | Mdm2      | transformed mouse 3T3 cell double minute 2                                   | ENSMUSG00000020184  |
| Q9JLN9 | Mtor  | 214724 | Rptor     | regulatory associated protein of MTOR, complex 1                             | ENSMUSG00000025583  |
| Q9JLN9 | Mtor  | 128168 | Rictor    | RPTOR independent companion of MTOR, complex 2                               | ENSMUSG00000050310  |
| Q9JLN9 | Mtor  | 162945 | Mapkap1   | mitogen-activated protein kinase associated protein 1                        | ENSMUSG00000038696  |
| Q9JLN9 | Mtor  | 146829 | Mlst8     | MTOR associated protein, LST8 homolog (S. cerevisiae)                        | ENSMUSG00000024142  |
| Q9JLN9 | Mtor  | 96775  | SGK1      | serum/glucocorticoid regulated kinase 1                                      | ENSG00000118515     |
| Q9JLN9 | Mtor  | 169606 | Prr5      | proline rich 5 (renal)                                                       | ENSMUSG00000036106  |
| Q9JLN9 | Mtor  | 22709  | AKT1      | v-akt murine thymoma viral oncogene homolog 1                                | ENSG00000142208     |
| Q9JLN9 | Mtor  | 147651 | Tsc2      | tuberous sclerosis 2                                                         | ENSMUSG00000002496  |
| Q9JLN9 | Mtor  | 150565 | Telo2     | TEL2, telomere maintenance 2, homolog (S. cerevisiae)                        | ENSMUSG00000024170  |
| Q9JLN9 | Mtor  | 171712 | Pml       | promyelocytic leukemia                                                       | ENSMUSG00000036986  |
| Q9JLN9 | Mtor  | 173589 | Irs1      | insulin receptor substrate 1                                                 | ENSMUSG00000055980  |
| Q9JLN9 | Mtor  | 170894 | Yy1       | YY1 transcription factor                                                     | ENSMUSG00000021264  |
| Q9JLN9 | Mtor  | 174623 | Akt1      | thymoma viral proto-oncogene 1                                               | ENSMUSG00000001729  |
| Q9JLN9 | Mtor  | 206007 | Eif3f     | eukaryotic translation initiation factor 3, subunit F                        | ENSMUSG00000031029  |
| Q9JLN9 | Mtor  | 51270  | AKT2      | v-akt murine thymoma viral oncogene homolog 2                                | ENSG00000105221     |
| Q9JLN9 | Mtor  | 155976 | Eif4ebp2  | eukaryotic translation initiation factor 4E binding protein 2                | ENSMUSG00000020091  |
| Q9JLN9 | Mtor  | 179873 | Akt1s1    | AKT1 substrate 1 (proline-rich)                                              | ENSMUSG00000011096  |
| Q9JLN9 | Mtor  | 171820 | RPTOR     | regulatory associated protein of MTOR, complex 1                             | ENSG00000141564     |
| Q9JLN9 | Mtor  | 17284  | EIF4EBP1  | eukaryotic translation initiation factor 4E binding protein 1                | ENSG00000187840     |
| Q9JLN9 | Mtor  | 39495  | FKBP1A    | FK506 binding protein 1A, 12kDa                                              | ENSG00000088832     |
| Q9JLN9 | Mtor  | 165511 | Atm       | ataxia telangiectasia mutated homolog (human)                                | ENSMUSG00000034218  |
| P09922 | Mx2   | 196509 | Irf8      | interferon regulatory factor 8                                               | ENSMUSG00000041515  |
| Q9WVP9 | Mx2   | 196509 | Irf8      | interferon regulatory factor 8                                               | ENSMUSG00000041515  |
| P50538 | Mxd1  | 168505 | Sin3b     | transcriptional regulator, SIN3B (yeast)                                     | ENSMUSG00000031622  |
| P50538 | Mxd1  | 169269 | Sin3a     | transcriptional regulator, SIN3A (yeast)                                     | ENSMUSG00000042557  |
| P50538 | Mxd1  | 196509 | Irf8      | interferon regulatory factor 8                                               | ENSMUSG00000041515  |
| P50538 | Mxd1  | 151490 | Max       | Max protein                                                                  | ENSMUSG00000059436  |
| P50538 | Mxd1  | 176737 | Smc3      | structural maintenance of chromosomes 3                                      | ENSMUSG00000024974  |
| P48972 | Mybl2 | 61868  | CCND1     | cyclin D1                                                                    | ENSG00000110092     |
| P48972 | Mybl2 | 24529  | CCNA1     | cyclin A1                                                                    | ENSG00000133101     |
| P48972 | Mybl2 | 39545  | CDK2      | cyclin-dependent kinase 2                                                    | ENSG00000123374     |
| P48972 | Mybl2 | 164181 | Ikzf2     | IKAROS family zinc finger 2                                                  | ENSMUSG00000025997  |
| P48972 | Mybl2 | 187207 | Tcfcp2l1  | transcription factor CP2-like 1                                              | ENSMUSG00000026380  |
| P48972 | Mybl2 | 158773 | AW146020  | expressed sequence AW146020                                                  | ENSMUSG00000035125  |
| P48972 | Mybl2 | 212973 | Ccnd1     | cyclin D1                                                                    | ENSMUSG00000070348  |
| Q6URW6 | Myh14 | 144904 | Grin1     | glutamate receptor, ionotropic, NMDA1 (zeta 1)                               | ENSMUSG00000026959  |
| Q8K314 | Myrip | 184264 | Rab27a    | RAB27A, member RAS oncogene family                                           | ENSMUSG00000032202  |
| Q6A037 | N4bp1 | 196509 | Irf8      | interferon regulatory factor 8                                               | ENSMUSG00000041515  |
| Q77S28 | Nacc1 | 185735 | Nanog     | Nanog homeobox                                                               | ENSMUSG00000012396  |
| Q77S28 | Nacc1 | 169383 | Rif1      | Rap1 interacting factor 1 homolog (yeast)                                    | ENSMUSG00000036202  |
| Q77S28 | Nacc1 | 213166 | Sall4     | sal-like 4 (Drosophila)                                                      | ENSMUSG00000027547  |
| Q77S28 | Nacc1 | 151499 | Zfp42     | zinc finger protein 42                                                       | ENSMUSG00000051176  |
| Q77S28 | Nacc1 | 201862 | Smarcc1   | SWI/SNF related, matrix associated, actin dependent regulator of chromatin 1 | ENSMUSG00000032481  |
| Q77S28 | Nacc1 | 170953 | Arid3b    | AT rich interactive domain 3B (BRIGHT-like)                                  | ENSMUSG00000004661  |
| Q77S28 | Nacc1 | 166800 | Gatad2b   | GATA zinc finger domain containing 2B                                        | ENSMUSG00000042390  |
| Q77S28 | Nacc1 | 196765 | Mybbp1a   | MYB binding protein (P160) 1a                                                | ENSMUSG00000040463  |
| Q77S28 | Nacc1 | 195728 | Zfp281    | zinc finger protein 281                                                      | ENSMUSG00000041483  |
| Q77S28 | Nacc1 | 178408 | Pou5f1    | POU domain, class 5, transcription factor 1                                  | ENSMUSG00000024406  |
| Q77S28 | Nacc1 | 171738 | Wdr18     | WD repeat domain 18                                                          | ENSMUSG00000035754  |
| Q77S28 | Nacc1 | 179324 | Sall1     | sal-like 1 (Drosophila)                                                      | ENSMUSG00000031665  |
| Q77S28 | Nacc1 | 147801 | Nacc2     | nucleus accumbens associated 2, BEN and BTB (POZ) domain containing 2        | ENSMUSG00000026932  |
| Q77S28 | Nacc1 | 171662 | Arid3a    | AT rich interactive domain 3A (BRIGHT-like)                                  | ENSMUSG00000019564  |
| Q99MD9 | Nasp  | 136907 | Hist1h1c  | histone cluster 1, H1c                                                       | ENSMUSG00000036181  |
| Q99MD9 | Nasp  | 134402 | Hist1h1b  | histone cluster 1, H1b                                                       | ENSMUSG00000058773  |
| Q99MD9 | Nasp  | 136238 | Hist1h1d  | histone cluster 1, H1d                                                       | ENSMUSG00000052565  |
| Q99MD9 | Nasp  | 136546 | Hist1h1e  | histone cluster 1, H1e                                                       | ENSMUSG00000051627  |
| Q99MD9 | Nasp  | 5152   | AIRE      | autoimmune regulator                                                         | ENSG00000160224     |
| Q99MD9 | Nasp  | 160472 | Cdk1      | cyclin-dependent kinase 1                                                    | ENSMUSG00000019942  |
| Q99MD9 | Nasp  | 150618 | Hspa2     | heat shock protein 2                                                         | ENSMUSG00000059970  |
| Q99MD9 | Nasp  | 137249 | Hist1h1a  | histone cluster 1, H1a                                                       | ENSMUSG00000049539  |
| P97432 | Nbr1  | 195070 | Plcg2     | phospholipase C, gamma 2                                                     | ENSMUSG00000034330  |
| P97432 | Nbr1  | 42625  | GABARAPL2 | GABA(A) receptor-associated protein-like 2                                   | ENSG00000034713     |
| P97432 | Nbr1  | 45638  | MAP1LC3B  | microtubule-associated protein 1 light chain 3 beta                          | ENSG00000140941     |
| P97432 | Nbr1  | 152428 | Spred2    | sprouty-related, EVH1 domain containing 2                                    | ENSMUSG00000045671  |
| P97432 | Nbr1  | 158983 | Mapk14    | mitogen-activated protein kinase 14                                          | ENSMUSG00000053436  |
| P97432 | Nbr1  | 168358 | Sqstm1    | sequestosome 1                                                               | ENSMUSG00000015837  |
| P97432 | Nbr1  | 64029  | UBC       | ubiquitin C                                                                  | ENSG00000150991     |

|        |         |        |               |                                                                  |                    |
|--------|---------|--------|---------------|------------------------------------------------------------------|--------------------|
| P97432 | Nbr1    | 51663  | GSK3B         | glycogen synthase kinase 3 beta                                  | ENSG00000082701    |
| P97432 | Nbr1    | 53956  | GSK3A         | glycogen synthase kinase 3 alpha                                 | ENSMUG00000105723  |
| P97432 | Nbr1    | 163320 | Z810422J05RIK | RIKEN cDNA 2810422J05 gene                                       | ENSMUG00000055553  |
| P13595 | Ncam1   | 209151 | Cst3          | cystatin C                                                       | ENSMUG00000027447  |
| P13595 | Ncam1   | 185288 | Sparcl1       | SPARC-like 1                                                     | ENSMUG00000029309  |
| P13595 | Ncam1   | 168935 | Aplp1         | amyloid beta (A4) precursor-like protein 1                       | ENSMUG00000006651  |
| P13595 | Ncam1   | 163151 | Hspa5         | heat shock protein 5                                             | ENSMUG00000026864  |
| P13595 | Ncam1   | 155394 | Thy1          | thymus cell antigen 1, theta                                     | ENSMUG00000032011  |
| P13595 | Ncam1   | 207129 | Spon1         | spondin 1, (F-spondin) extracellular matrix protein              | ENSMUG00000038156  |
| P13595 | Ncam1   | 146661 | Aplp2         | amyloid beta (A4) precursor-like protein 2                       | ENSMUG00000031996  |
| P13595 | Ncam1   | 211078 | Oat           | ornithine aminotransferase                                       | ENSMUG00000030934  |
| P13595 | Ncam1   | 151663 | Mat1a         | methionine adenosyltransferase I, alpha                          | ENSMUG00000037798  |
| P13595 | Ncam1   | 172954 | App           | amyloid beta (A4) precursor protein                              | ENSMUG00000022892  |
| P13595 | Ncam1   | 129626 | Pdia6         | protein disulfide isomerase associated 6                         | ENSMUG00000020571  |
| P13595 | Ncam1   | 131138 | Calu          | calumenin                                                        | ENSMUG00000029767  |
| P13595 | Ncam1   | 152814 | Ppp1r2        | protein phosphatase 1, regulatory (inhibitor) subunit 2          | ENSMUG00000047714  |
| P13595 | Ncam1   | 196143 | Epb4.113      | erythrocyte protein band 4.1-like 3                              | ENSMUG00000024044  |
| P13595 | Ncam1   | 178669 | Ppib          | peptidylprolyl isomerase B                                       | ENSMUG00000032383  |
| P13595 | Ncam1   | 174959 | Calr          | calreticulin                                                     | ENSMUG0000003814   |
| P13595 | Ncam1   | 182078 | Hsp90b1       | heat shock protein 90, beta (Grp94), member 1                    | ENSMUG00000020048  |
| P13595 | Ncam1   | 168591 | Canx          | calnexin                                                         | ENSMUG00000020368  |
| P13595 | Ncam1   | 176351 | Cntn1         | contactin 1                                                      | ENSMUG00000055022  |
| P13595 | Ncam1   | 168462 | Rcn2          | reticulocalbin 2                                                 | ENSMUG00000032320  |
| P13595 | Ncam1   | 205238 | Cistn1        | calsyntenin 1                                                    | ENSMUG00000039953  |
| P13595 | Ncam1   | 182141 | Gabbr1        | gamma-aminobutyric acid (GABA) B receptor, 1                     | ENSMUG00000024462  |
| P13595 | Ncam1   | 157064 | Hyou1         | hypoxia up-regulated 1                                           | ENSMUG00000032115  |
| P13595 | Ncam1   | 171290 | Hspa4         | heat shock protein 4                                             | ENSMUG00000020361  |
| P13595 | Ncam1   | 175327 | Srgap3        | SLIT-ROBO Rho GTPase activating protein 3                        | ENSMUG00000030257  |
| P13595 | Ncam1   | 141546 | Ganab         | alpha glucosidase 2 alpha neutral subunit                        | ENSMUG00000071650  |
| P13595 | Ncam1   | 192274 | Nfasc         | neurofascin                                                      | ENSMUG00000026442  |
| P13595 | Ncam1   | 178513 | Atp2b2        | ATPase, Ca++ transporting, plasma membrane 2                     | ENSMUG00000030302  |
| P13595 | Ncam1   | 146362 | Erp44         | endoplasmic reticulum protein 44                                 | ENSMUG00000028343  |
| P13595 | Ncam1   | 168858 | Lingo1        | leucine rich repeat and Iq domain containing 1                   | ENSMUG00000049556  |
| P13595 | Ncam1   | 186875 | Cistn3        | calsyntenin 3                                                    | ENSMUG00000008153  |
| P13595 | Ncam1   | 260830 | Prnp          | prion protein                                                    | ENSMUG00000079037  |
| P13595 | Ncam1   | 158252 | Cpe           | carboxypeptidase E                                               | ENSMUG00000037852  |
| P13595 | Ncam1   | 192631 | Alx4          | aristaless-like homeobox 4                                       | ENSMUG00000040310  |
| P13595 | Ncam1   | 194292 | Lef1          | lymphoid enhancer binding factor 1                               | ENSMUG00000027985  |
| P13595 | Ncam1   | 137550 | Nova1         | neuro-oncological ventral antigen 1                              | ENSMUG00000021047  |
| Q9ESJ4 | Nckip5d | 68262  | GRB2          | growth factor receptor-bound protein 2                           | ENSG00000177885    |
| Q9ESJ4 | Nckip5d | 38956  | WASL          | Wiskott-Aldrich syndrome-like                                    | ENSG00000106299    |
| Q9ESJ4 | Nckip5d | 178542 | Prdx1         | peroxiredoxin 1                                                  | ENSMUG00000028691  |
| Q9ESJ4 | Nckip5d | 138913 | Crkl          | v-crk sarcoma virus CT10 oncogene homolog (avian)-like           | ENSMUG00000006134  |
| Q9ESJ4 | Nckip5d | 155162 | Hspd1         | heat shock protein 1 (chaperonin)                                | ENSMUG00000025980  |
| Q9ESJ4 | Nckip5d | 196509 | Irf8          | interferon regulatory factor 8                                   | ENSMUG00000041515  |
| P70365 | Ncoa1   | 211637 | Stat3         | signal transducer and activator of transcription 3               | ENSMUG00000004040  |
| P70365 | Ncoa1   | 173696 | Cebpg         | CCAAT/enhancer binding protein (C/EBP), gamma                    | ENSMUG000000056216 |
| P70365 | Ncoa1   | 51560  | NR112         | nuclear receptor subfamily 1, group I, member 2                  | ENSG00000144852    |
| P70365 | Ncoa1   | 164782 | Ep300         | E1A binding protein p300                                         | ENSMUG00000055024  |
| P70365 | Ncoa1   | 140748 | Carm1         | coactivator-associated arginine methyltransferase 1              | ENSMUG00000032185  |
| P70365 | Ncoa1   | 179227 | Vdr           | vitamin D receptor                                               | ENSMUG00000022479  |
| P70365 | Ncoa1   | 210842 | Rara          | retinoic acid receptor, alpha                                    | ENSMUG00000037992  |
| P70365 | Ncoa1   | 204130 | Nr113         | nuclear receptor subfamily 1, group I, member 3                  | ENSMUG00000005677  |
| O09000 | Ncoa3   | 195602 | Stat6         | signal transducer and activator of transcription 6               | ENSMUG00000002147  |
| O09000 | Ncoa3   | 164782 | Ep300         | E1A binding protein p300                                         | ENSMUG00000055024  |
| O09000 | Ncoa3   | 173162 | Sufu          | suppressor of fused homolog (Drosophila)                         | ENSMUG00000025231  |
| O09000 | Ncoa3   | 42577  | GLI1          | GLI family zinc finger 1                                         | ENSG00000111087    |
| O09000 | Ncoa3   | 158045 | Zfp219        | zinc finger protein 219                                          | ENSMUG00000049295  |
| O09000 | Ncoa3   | 154384 | Lgals3        | lectin, galactose binding, soluble 3                             | ENSMUG00000050335  |
| O09000 | Ncoa3   | 175037 | Pias1         | protein inhibitor of activated STAT 1                            | ENSMUG00000032405  |
| O09000 | Ncoa3   | 105630 | NR5A2         | nuclear receptor subfamily 5, group A, member 2                  | ENSG00000116833    |
| O09000 | Ncoa3   | 156458 | Ikbkg         | inhibitor of kappaB kinase gamma                                 | ENSMUG00000004221  |
| O09000 | Ncoa3   | 139644 | Trps1         | trichorhinophalangeal syndrome 1 (human)                         | ENSMUG00000038679  |
| O09000 | Ncoa3   | 164343 | Sirt2         | sirtuin 2 (silent mating type information regulation 2, human)   | ENSMUG00000015149  |
| O09000 | Ncoa3   | 179104 | Tle6          | transducin-like enhancer of split 6, homolog of Drosophila       | ENSMUG00000034758  |
| O09000 | Ncoa3   | 206728 | Tbx4          | T-box 4                                                          | ENSMUG00000000094  |
| O09000 | Ncoa3   | 158773 | AW146020      | expressed sequence AW146020                                      | ENSMUG00000035125  |
| O09000 | Ncoa3   | 159925 | Nr112         | nuclear receptor subfamily 1, group I, member 2                  | ENSMUG00000022809  |
| O09000 | Ncoa3   | 172404 | Lass2         | LAG1 homolog, ceramide synthase 2                                | ENSMUG00000015714  |
| O09000 | Ncoa3   | 136962 | Prdx5         | peroxiredoxin 5                                                  | ENSMUG00000024953  |
| O09000 | Ncoa3   | 135097 | Rnf19a        | ring finger protein 19A                                          | ENSMUG00000022280  |
| O09000 | Ncoa3   | 129513 | Crebbp        | CREB binding protein                                             | ENSMUG00000022521  |
| O09000 | Ncoa3   | 208527 | Polr3f        | polymerase (RNA) III (DNA directed) polypeptide F                | ENSMUG00000027427  |
| O09000 | Ncoa3   | 130251 | Hnf4g         | hepatocyte nuclear factor 4, gamma                               | ENSMUG00000017688  |
| O09000 | Ncoa3   | 159441 | Sirt1         | sirtuin 1 (silent mating type information regulation 2, human)   | ENSMUG00000020063  |
| O09000 | Ncoa3   | 187635 | Ptpn6         | protein tyrosine phosphatase, non-receptor type 6                | ENSMUG00000004266  |
| O09000 | Ncoa3   | 174783 | Ehmt2         | euchromatic histone lysine N-methyltransferase 2                 | ENSMUG00000013787  |
| O09000 | Ncoa3   | 140748 | Carm1         | coactivator-associated arginine methyltransferase 1              | ENSMUG00000032185  |
| O09000 | Ncoa3   | 151644 | Rorb          | RAR-related orphan receptor beta                                 | ENSMUG00000036192  |
| O09000 | Ncoa3   | 181454 | Ercc8         | excision repair cross-complementing rodent repair deficiency     | ENSMUG00000021694  |
| O09000 | Ncoa3   | 159268 | Esrrb         | estrogen related receptor, beta                                  | ENSMUG00000021255  |
| O09000 | Ncoa3   | 189776 | Per1          | period homolog 1 (Drosophila)                                    | ENSMUG00000020893  |
| O09000 | Ncoa3   | 170220 | Mef2c         | myocyte enhancer factor 2C                                       | ENSMUG00000005583  |
| O09000 | Ncoa3   | 159505 | Gtf2e1        | general transcription factor II E, polypeptide 1 (alpha subunit) | ENSMUG00000022828  |
| O09000 | Ncoa3   | 172468 | Setdb1        | SET domain, bifurcated 1                                         | ENSMUG000000015697 |
| O09000 | Ncoa3   | 168943 | Sap18         | Sin3-associated polypeptide 18                                   | ENSMUG00000021963  |
| O09000 | Ncoa3   | 204435 | Gm5900        | predicted pseudogene 5900                                        | ENSMUG00000059039  |
| O09000 | Ncoa3   | 201492 | Prdx6         | peroxiredoxin 6                                                  | ENSMUG00000026701  |
| O09000 | Ncoa3   | 189480 | Hnrnpa1       | heterogeneous nuclear ribonucleoprotein A1                       | ENSMUG00000046434  |

|        |        |        |               |                                                                      |                     |
|--------|--------|--------|---------------|----------------------------------------------------------------------|---------------------|
| Q9CZA6 | Nde1   | 189670 | 2310047M10R   | RIKEN cDNA 2310047M10 gene                                           | ENSMUSG00000045176  |
| Q9CZA6 | Nde1   | 51267  | TUBG1         | tubulin, gamma 1                                                     | ENSG00000131462     |
| Q9CZA6 | Nde1   | 16417  | PAFAH1B1      | platelet-activating factor acetylhydrolase 1b, regulatory subunit 1  | ENSG00000007168     |
| Q9CZA6 | Nde1   | 146693 | Sla           | src-like adaptor                                                     | ENSMUSG00000022372  |
| Q9CZA6 | Nde1   | 137484 | Tcp1          | t-complex protein 1                                                  | ENSMUSG00000068039  |
| Q9CZA6 | Nde1   | 164991 | Pcnt          | pericentrin (kendrin)                                                | ENSMUSG00000001151  |
| Q9CZA6 | Nde1   | 207728 | 6330503K22Rik | RIKEN cDNA 6330503K22 gene                                           | ENSMUSG00000033904  |
| Q9CZA6 | Nde1   | 193625 | Dynll1        | dynein light chain LC8-type 1                                        | ENSMUSG00000009013  |
| Q9CZA6 | Nde1   | 198862 | Pafah1b1      | platelet-activating factor acetylhydrolase, isoform 1b, subunit 1    | ENSMUSG00000020745  |
| Q9CZA6 | Nde1   | 27907  | DYNC11I       | dynein, cytoplasmic 1, intermediate chain 1                          | ENSG00000158560     |
| Q9CZA6 | Nde1   | 95078  | RPA2          | replication protein A2, 32kDa                                        | ENSG00000117748     |
| Q9CZA6 | Nde1   | 16229  | NDE1          | nudE nuclear distribution gene E homolog 1 (A. nidulans)             | ENSG00000072864     |
| Q9CZA6 | Nde1   | 29031  | NDEL1         | nudE nuclear distribution gene E homolog (A. nidulans)-like 1        | ENSG00000166579     |
| Q9CZA6 | Nde1   | 80845  | FAM190B       | family with sequence similarity 190, member B                        | ENSG00000107771     |
| Q9CZA6 | Nde1   | 98013  | SYNE1         | spectrin repeat containing, nuclear envelope 1                       | ENSG00000131018     |
| Q9CZA6 | Nde1   | 71136  | DIXDC1        | DIX domain containing 1                                              | ENSG00000150764     |
| Q9DC70 | Ndufs7 | 30077  | SNCA          | synuclein, alpha (non A4 component of amyloid precursor protein)     | ENSG00000145335     |
| Q9D6J4 | Necab3 | 191187 | Apba2         | amyloid beta (A4) precursor protein-binding, family A, member 2      | ENSMUSG00000030519  |
| Q8CF10 | Nedd4l | 141726 | Ndfip1        | Nedd4 family interacting protein 1                                   | ENSMUSG00000024425  |
| Q8CF10 | Nedd4l | 211991 | Ywhab         | tyrosine 3-monooxygenase/tryptophan 5-monooxygenase                  | ENSMUSG00000018326  |
| Q8CF10 | Nedd4l | 200597 | Ywhae         | tyrosine 3-monooxygenase/tryptophan 5-monooxygenase                  | ENSMUSG00000020849  |
| Q8CF10 | Nedd4l | 137283 | Sgk1          | serum/glucocorticoid regulated kinase 1                              | ENSMUSG00000019970  |
| Q8CF10 | Nedd4l | 189817 | Scnn1a        | sodium channel, nonvoltage-gated 1 alpha                             | ENSMUSG00000030340  |
| O35177 | Nedd9  | 166211 | Gnb2l1        | guanine nucleotide binding protein (G protein), beta polypeptide 2   | ENSMUSG00000020372  |
| O35177 | Nedd9  | 201810 | Myo18a        | myosin XVIIIa                                                        | ENSMUSG00000000631  |
| O35177 | Nedd9  | 200571 | Crk           | v-crk sarcoma virus CT10 oncogene homolog (avian)                    | ENSMUSG00000017776  |
| P97798 | Neo1   | 192737 | Rgma          | RGM domain family, member A                                          | ENSMUSG00000070509  |
| P97798 | Neo1   | 137550 | Nova1         | neuro-oncological ventral antigen 1                                  | ENSMUSG00000021047  |
| P97798 | Neo1   | 148322 | Ptk2          | PTK2 protein tyrosine kinase 2                                       | ENSMUSG00000022607  |
| Q810U3 | Nfasc  | 209151 | Cst3          | cystatin C                                                           | ENSMUSG000000027447 |
| Q810U3 | Nfasc  | 185288 | Sparcl1       | SPARC-like 1                                                         | ENSMUSG00000029309  |
| Q810U3 | Nfasc  | 168935 | Aplp1         | amyloid beta (A4) precursor-like protein 1                           | ENSMUSG00000006651  |
| Q810U3 | Nfasc  | 163151 | Hspa5         | heat shock protein 5                                                 | ENSMUSG00000026864  |
| Q810U3 | Nfasc  | 155394 | Thy1          | thymus cell antigen 1, theta                                         | ENSMUSG00000032011  |
| Q810U3 | Nfasc  | 207129 | Spon1         | spondin 1, (f-spondin) extracellular matrix protein                  | ENSMUSG000000038156 |
| Q810U3 | Nfasc  | 146661 | Aplp2         | amyloid beta (A4) precursor-like protein 2                           | ENSMUSG00000031996  |
| Q810U3 | Nfasc  | 211078 | Oat           | ornithine aminotransferase                                           | ENSMUSG00000030934  |
| Q810U3 | Nfasc  | 151663 | Mat1a         | methionine adenosyltransferase I, alpha                              | ENSMUSG00000037798  |
| Q810U3 | Nfasc  | 172954 | App           | amyloid beta (A4) precursor protein                                  | ENSMUSG00000022892  |
| Q810U3 | Nfasc  | 129626 | Pdia6         | protein disulfide isomerase associated 6                             | ENSMUSG00000020571  |
| Q810U3 | Nfasc  | 131138 | Calu          | calumenin                                                            | ENSMUSG00000029767  |
| Q810U3 | Nfasc  | 152814 | Ppp1r2        | protein phosphatase 1, regulatory (inhibitor) subunit 2              | ENSMUSG00000047714  |
| Q810U3 | Nfasc  | 196143 | Epb4.1l3      | erythrocyte protein band 4.1-like 3                                  | ENSMUSG00000024044  |
| Q810U3 | Nfasc  | 178669 | Ppib          | peptidylprolyl isomerase B                                           | ENSMUSG00000032383  |
| Q810U3 | Nfasc  | 174959 | Calr          | calreticulin                                                         | ENSMUSG00000003814  |
| Q810U3 | Nfasc  | 182078 | Hsp90b1       | heat shock protein 90, beta (Grp94), member 1                        | ENSMUSG00000020048  |
| Q810U3 | Nfasc  | 168591 | Canx          | calnexin                                                             | ENSMUSG00000020368  |
| Q810U3 | Nfasc  | 176351 | Cntn1         | contactin 1                                                          | ENSMUSG000000055022 |
| Q810U3 | Nfasc  | 163105 | Ncam1         | neural cell adhesion molecule 1                                      | ENSMUSG00000039542  |
| Q810U3 | Nfasc  | 168462 | Rcn2          | reticulocalbin 2                                                     | ENSMUSG000000032320 |
| Q810U3 | Nfasc  | 205238 | Clstn1        | calsyntenin 1                                                        | ENSMUSG00000039953  |
| Q810U3 | Nfasc  | 182141 | Gabbr1        | gamma-aminobutyric acid (GABA) B receptor, 1                         | ENSMUSG00000024462  |
| Q810U3 | Nfasc  | 157064 | Hyou1         | hypoxia up-regulated 1                                               | ENSMUSG00000032115  |
| Q810U3 | Nfasc  | 171290 | Hspa4         | heat shock protein 4                                                 | ENSMUSG00000020361  |
| Q810U3 | Nfasc  | 175327 | Srqap3        | SLIT-ROBO Rho GTPase activating protein 3                            | ENSMUSG00000030257  |
| Q810U3 | Nfasc  | 141546 | Ganab         | alpha glucosidase 2 alpha neutral subunit                            | ENSMUSG00000071650  |
| Q810U3 | Nfasc  | 178513 | Atp2b2        | ATPase, Ca++ transporting, plasma membrane 2                         | ENSMUSG00000030302  |
| Q810U3 | Nfasc  | 146362 | Erp44         | endoplasmic reticulum protein 44                                     | ENSMUSG00000028343  |
| Q810U3 | Nfasc  | 168858 | Lingo1        | leucine rich repeat and Iq domain containing 1                       | ENSMUSG00000049556  |
| Q810U3 | Nfasc  | 186875 | Clstn3        | calsyntenin 3                                                        | ENSMUSG000000008153 |
| Q810U3 | Nfasc  | 260830 | Prnp          | prion protein                                                        | ENSMUSG00000079037  |
| Q810U3 | Nfasc  | 158252 | Cpe           | carboxypeptidase E                                                   | ENSMUSG00000037852  |
| Q810U3 | Nfasc  | 175763 | Tal1          | T-cell acute lymphocytic leukemia 1                                  | ENSMUSG00000028717  |
| Q9WTK5 | Nfkb2  | 132298 | Rela          | v-rel reticuloendotheliosis viral oncogene homolog A (avian)         | ENSMUSG00000024927  |
| Q9WTK5 | Nfkb2  | 190301 | Bcl2a1a       | B-cell leukemia/lymphoma 2 related protein A1a                       | ENSMUSG000000074147 |
| Q9WTK5 | Nfkb2  | 183749 | Il17ra        | interleukin 17 receptor A                                            | ENSMUSG00000002897  |
| Q9WTK5 | Nfkb2  | 151419 | Relb          | avian reticuloendotheliosis viral (v-rel) oncogene related protein 1 | ENSMUSG00000002983  |
| Q9WTK5 | Nfkb2  | 195445 | Nfkb1         | nuclear factor of kappa light polypeptide gene enhancer in B-cells 1 | ENSMUSG00000028163  |
| Q9WTK5 | Nfkb2  | 181227 | Cxcl13        | chemokine (C-X-C motif) ligand 13                                    | ENSMUSG00000023078  |
| Q9WTK5 | Nfkb2  | 144556 | Myc           | myelocytomatosis oncogene                                            | ENSMUSG000000022346 |
| Q9WTK5 | Nfkb2  | 155648 | Rel           | reticuloendotheliosis oncogene                                       | ENSMUSG00000020275  |
| Q9WTK5 | Nfkb2  | 208712 | Atf3          | activating transcription factor 3                                    | ENSMUSG00000026628  |
| Q9WTK5 | Nfkb2  | 185673 | Bcl2          | B-cell leukemia/lymphoma 2                                           | ENSMUSG00000057329  |
| Q9WTK5 | Nfkb2  | 157258 | Il9           | interleukin 9                                                        | ENSMUSG00000021538  |
| Q9WTK5 | Nfkb2  | 209389 | Cr2           | complement receptor 2                                                | ENSMUSG000000026616 |
| Q9WTK5 | Nfkb2  | 130417 | Fcer2a        | Fc receptor, IgE, low affinity II, alpha polypeptide                 | ENSMUSG00000005540  |
| Q9WTK5 | Nfkb2  | 158495 | Sumo1         | SMT3 suppressor of mif two 3 homolog 1 (yeast)                       | ENSMUSG00000026021  |
| Q9WTK5 | Nfkb2  | 165943 | Nfkbiz        | nuclear factor of kappa light polypeptide gene enhancer in B-cells 2 | ENSMUSG00000035356  |
| Q8VE28 | Nkd2   | 207981 | Dvl1          | dishevelled, dsh homolog 1 (Drosophila)                              | ENSMUSG00000029071  |
| Q8VE28 | Nkd2   | 144321 | Dvl3          | dishevelled 3, dsh homolog (Drosophila)                              | ENSMUSG00000003233  |
| Q8VE28 | Nkd2   | 193127 | Dvl2          | dishevelled 2, dsh homolog (Drosophila)                              | ENSMUSG00000020888  |
| Q8VE28 | Nkd2   | 213588 | Smurf2        | SMAD specific E3 ubiquitin protein ligase 2                          | ENSMUSG00000018363  |
| Q8VE28 | Nkd2   | 171451 | Med16         | mediator complex subunit 16                                          | ENSMUSG00000013833  |
| Q8VE28 | Nkd2   | 195662 | Zscan2        | zinc finger and SCAN domain containing 2                             | ENSMUSG00000038797  |
| Q8VE28 | Nkd2   | 148311 | Zfp513        | zinc finger protein 513                                              | ENSMUSG000000043059 |
| Q8VE28 | Nkd2   | 144115 | Ewsr1         | Ewing sarcoma breakpoint region 1                                    | ENSMUSG00000009079  |
| P50220 | Nkx2-1 | 209333 | Vsx1          | visual system homeobox 1 homolog (zebrafish)                         | ENSMUSG00000033080  |
| P50220 | Nkx2-1 | 148014 | Hoxa9         | homeobox A9                                                          | ENSMUSG00000038227  |
| P50220 | Nkx2-1 | 165392 | Nr2f6         | nuclear receptor subfamily 2, group F, member 6                      | ENSMUSG00000002393  |



|        |        |        |          |                                                                                                                |                     |
|--------|--------|--------|----------|----------------------------------------------------------------------------------------------------------------|---------------------|
| P50220 | Nkx2-1 | 605656 | Gsx2     | GS homeobox 2                                                                                                  | ENSMUSG00000092446  |
| P50220 | Nkx2-1 | 207256 | Mixl1    | Mixl1 homeobox-like 1 ( <i>Xenopus laevis</i> )                                                                | ENSMUSG00000026497  |
| P50220 | Nkx2-1 | 141000 | Smarca4  | SWI/SNF related, matrix associated, actin dependent regulator of chromatin subfamily A member 4                | ENSMUSG000000032187 |
| P50220 | Nkx2-1 | 189282 | Hoxc12   | homeobox C12                                                                                                   | ENSMUSG00000050328  |
| P50220 | Nkx2-1 | 181327 | Emx2     | empty spiracles homolog 2 ( <i>Drosophila</i> )                                                                | ENSMUSG000000043969 |
| P50220 | Nkx2-1 | 128584 | Gata6    | GATA binding protein 6                                                                                         | ENSMUSG00000005836  |
| P50220 | Nkx2-1 | 130251 | Hnf4g    | hepatocyte nuclear factor 4, gamma                                                                             | ENSMUSG00000017688  |
| P50220 | Nkx2-1 | 142554 | Pax8     | paired box gene 8                                                                                              | ENSMUSG00000026976  |
| Q8K3Z0 | Nod2   | 148496 | Card9    | caspace recruitment domain family, member 9                                                                    | ENSMUSG00000026928  |
| Q8K3Z0 | Nod2   | 131590 | Casp1    | caspace 1                                                                                                      | ENSMUSG00000025888  |
| Q8K3Z0 | Nod2   | 69618  | CASP1    | caspace 1, apoptosis-related cysteine peptidase (interleukin-1 receptor-interacting serine-threonine kinase 2) | ENSG00000137752     |
| Q8K3Z0 | Nod2   | 27941  | RIPK2    | receptor-interacting serine-threonine kinase 2                                                                 | ENSG00000104312     |
| Q8K3Z0 | Nod2   | 130745 | Ripk2    | receptor (TNFRSF)-interacting serine-threonine kinase 2                                                        | ENSMUSG000000041135 |
| Q8K3Z0 | Nod2   | 84613  | MAPK14   | mitogen-activated protein kinase 14                                                                            | ENSG00000112062     |
| P31695 | Notch4 | 213130 | Nfatc2   | nuclear factor of activated T-cells, cytoplasmic, calcineurin dependent 2                                      | ENSMUSG000000027544 |
| P31695 | Notch4 | 211637 | Stat3    | signal transducer and activator of transcription 3                                                             | ENSMUSG00000004040  |
| P31695 | Notch4 | 41233  | FBXW7    | F-box and WD repeat domain containing 7                                                                        | ENSG00000109670     |
| Q61937 | Npm1   | 46431  | MDM2     | Mdm2 p53 binding protein homolog (mouse)                                                                       | ENSG00000135679     |
| Q61937 | Npm1   | 171159 | Npm3     | nucleoplasm 3                                                                                                  | ENSMUSG00000056209  |
| Q61937 | Npm1   | 173505 | Rps15    | ribosomal protein S15                                                                                          | ENSMUSG000000063457 |
| Q61937 | Npm1   | 203768 | Gm9846   | predicted gene 9846                                                                                            | ENSMUSG00000050621  |
| Q61937 | Npm1   | 182925 | Ybx1     | Y box protein 1                                                                                                | ENSMUSG00000028639  |
| Q61937 | Npm1   | 176734 | Gpank1   | G patch domain and ankyrin repeats 1                                                                           | ENSMUSG00000024389  |
| Q61937 | Npm1   | 155472 | Fbxw7    | F-box and WD-40 domain protein 7                                                                               | ENSMUSG00000028086  |
| Q61937 | Npm1   | 191036 | Trp53    | transformation related protein 53                                                                              | ENSMUSG000000059552 |
| Q61937 | Npm1   | 206505 | Swap70   | SWA-70 protein                                                                                                 | ENSMUSG00000031015  |
| P45448 | Nr5a2  | 195189 | Nr0b2    | nuclear receptor subfamily 0, group B, member 2                                                                | ENSMUSG00000037583  |
| P45448 | Nr5a2  | 134573 | Apc      | adenomatous polyposis coli                                                                                     | ENSMUSG00000005871  |
| P45448 | Nr5a2  | 184281 | Nr1h4    | nuclear receptor subfamily 1, group H, member 4                                                                | ENSMUSG00000047638  |
| P45448 | Nr5a2  | 159027 | Nr0b1    | nuclear receptor subfamily 0, group B, member 1                                                                | ENSMUSG000000025056 |
| Q8VCQ3 | Nrbf2  | 18226  | PRKAA1   | protein kinase, AMP-activated, alpha 1 catalytic subunit                                                       | ENSG00000132356     |
| O35181 | Nrg3   | 137550 | Nova1    | neuro-oncological ventral antigen 1                                                                            | ENSMUSG00000021047  |
| O35181 | Nrg3   | 7992   | ERBB4    | v-erb-a erythroblastic leukemia viral oncogene homolog 4                                                       | ENSG00000178568     |
| Q9CZ44 | Nsf1c  | 139755 | Vcp      | valosin containing protein                                                                                     | ENSMUSG00000028452  |
| Q99P30 | Ntm    | 30077  | SNCA     | synuclein, alpha (non A4 component of amyloid precursor protein)                                               | ENSG00000145335     |
| Q99P30 | Ntm    | 260830 | Prnp     | prion protein                                                                                                  | ENSMUSG00000079037  |
| Q9QZS3 | Numb   | 5590   | ITGB2    | integrin, beta 2 (complement component 3 receptor 3 and CD61)                                                  | ENSG00000160255     |
| Q9QZS3 | Numb   | 547297 | ITGB3    | integrin, beta 3 (platelet glycoprotein IIIa, antigen CD61)                                                    | ENSG00000259207     |
| Q9QZS3 | Numb   | 53924  | ITGB5    | integrin, beta 5                                                                                               | ENSG00000082781     |
| Q9QZS3 | Numb   | 36071  | ITGB7    | integrin, beta 7                                                                                               | ENSG00000139626     |
| Q9QZS3 | Numb   | 208968 | Lnx2     | ligand of numb-protein X 2                                                                                     | ENSMUSG00000016520  |
| Q9QZS3 | Numb   | 171744 | Lnx1     | ligand of numb-protein X 1                                                                                     | ENSMUSG00000029228  |
| Q9QZS3 | Numb   | 149571 | Notch1   | Notch gene homolog 1 ( <i>Drosophila</i> )                                                                     | ENSMUSG00000026923  |
| Q9QZS3 | Numb   | 174308 | Eps15    | epidermal growth factor receptor pathway substrate 15                                                          | ENSMUSG00000028552  |
| Q9QZS3 | Numb   | 200475 | Ehd4     | EH-domain containing 4                                                                                         | ENSMUSG000000027293 |
| Q9QZS3 | Numb   | 135500 | Ehd1     | EH-domain containing 1                                                                                         | ENSMUSG00000024772  |
| Q9QZS3 | Numb   | 172954 | App      | amyloid beta (A4) precursor protein                                                                            | ENSMUSG00000022892  |
| Q8BH74 | Nup107 | 18046  | SEC13    | SEC13 homolog ( <i>S. cerevisiae</i> )                                                                         | ENSG00000157020     |
| Q8BH74 | Nup107 | 107322 | NUP133   | nucleoporin 133kDa                                                                                             | ENSG00000069248     |
| Q8BH74 | Nup107 | 71005  | LGALS3BP | lectin, galactoside-binding, soluble, 3 binding protein                                                        | ENSG00000108679     |
| Q8BH74 | Nup107 | 68125  | NUP85    | nucleoporin 85kDa                                                                                              | ENSG00000125450     |
| Q8BH74 | Nup107 | 1204   | SEH1L    | SEH1-like ( <i>S. cerevisiae</i> )                                                                             | ENSG00000085415     |
| Q8BH74 | Nup107 | 53528  | NUP37    | nucleoporin 37kDa                                                                                              | ENSG00000075188     |
| Q8BH74 | Nup107 | 43974  | NUP160   | nucleoporin 160kDa                                                                                             | ENSG00000030066     |
| Q8BH74 | Nup107 | 46276  | NUP107   | nucleoporin 107kDa                                                                                             | ENSG00000111581     |
| Q8BH74 | Nup107 | 97774  | NUP43    | nucleoporin 43kDa                                                                                              | ENSG00000120253     |
| Q8BH74 | Nup107 | 24385  | NUP98    | nucleoporin 98kDa                                                                                              | ENSG00000110713     |
| Q99P88 | Nup155 | 17015  | NUP155   | nucleoporin 155kDa                                                                                             | ENSG00000113569     |
| Q9Z0W3 | Nup160 | 196509 | Irf8     | interferon regulatory factor 8                                                                                 | ENSMUSG000000041515 |
| Q8CEC0 | Nup88  | 53335  | XPO1     | exportin 1 (CRM1 homolog, yeast)                                                                               | ENSG00000082898     |
| Q8CEC0 | Nup88  | 246910 | NUP62    | nucleoporin 62kDa                                                                                              | ENSG00000213024     |
| Q8CEC0 | Nup88  | 89810  | NUP214   | nucleoporin 214kDa                                                                                             | ENSG00000126883     |
| Q8CEC0 | Nup88  | 64798  | RAN      | RAN, member RAS oncogene family                                                                                | ENSG00000132341     |
| Q8CEC0 | Nup88  | 21334  | NUP88    | nucleoporin 88kDa                                                                                              | ENSG00000108559     |
| P00860 | Odc1   | 189844 | Tnfrsf1a | tumor necrosis factor receptor superfamily, member 1a                                                          | ENSMUSG00000030341  |
| P00860 | Odc1   | 175763 | Tal1     | T-cell acute lymphocytic leukemia 1                                                                            | ENSMUSG00000028717  |
| Q9EQW6 | Oliq2  | 149644 | Id4      | inhibitor of DNA binding 4                                                                                     | ENSMUSG00000021379  |
| Q9EQW6 | Oliq2  | 131550 | Id2      | inhibitor of DNA binding 2                                                                                     | ENSMUSG00000020644  |
| Q9EQW6 | Oliq2  | 174161 | Tcf3     | transcription factor 3                                                                                         | ENSMUSG00000020167  |
| Q9Z1N2 | Orc1   | 135657 | Mcm4     | minichromosome maintenance deficient 4 homolog ( <i>S. cerevisiae</i> )                                        | ENSMUSG00000022673  |
| Q9Z1N2 | Orc1   | 168508 | Orc4     | origin recognition complex, subunit 4                                                                          | ENSMUSG00000026761  |
| Q9Z1N2 | Orc1   | 142237 | Cdc45    | cell division cycle 45 homolog ( <i>S. cerevisiae</i> )                                                        | ENSMUSG00000000028  |
| Q9Z1N2 | Orc1   | 95078  | RPA2     | replication protein A2, 32kDa                                                                                  | ENSG00000117748     |
| Q9Z1N2 | Orc1   | 186454 | Cdc7     | cell division cycle 7 ( <i>S. cerevisiae</i> )                                                                 | ENSMUSG00000029283  |
| Q9Z1N2 | Orc1   | 205861 | Mcm7     | minichromosome maintenance deficient 7 ( <i>S. cerevisiae</i> )                                                | ENSMUSG000000029730 |
| Q9Z1N2 | Orc1   | 139206 | Orc5     | origin recognition complex, subunit 5                                                                          | ENSMUSG00000029012  |
| Q9Z1N2 | Orc1   | 210829 | Cdc6     | cell division cycle 6 homolog ( <i>S. cerevisiae</i> )                                                         | ENSMUSG00000017499  |
| Q9Z1N2 | Orc1   | 167535 | Mcm2     | minichromosome maintenance deficient 2 mitotin ( <i>S. cerevisiae</i> )                                        | ENSMUSG00000002870  |
| Q9Z1N2 | Orc1   | 133737 | Dbf4     | DBF4 homolog ( <i>S. cerevisiae</i> )                                                                          | ENSMUSG00000002297  |
| Q9Z1N2 | Orc1   | 156912 | Orc2     | origin recognition complex, subunit 2                                                                          | ENSMUSG00000026037  |
| Q9Z1N2 | Orc1   | 189829 | Mcm6     | minichromosome maintenance deficient 6 (MIS5 homolog)                                                          | ENSMUSG00000026355  |
| Q9Z1N2 | Orc1   | 78348  | ORC2     | origin recognition complex, subunit 2                                                                          | ENSG00000115942     |
| Q9Z1N2 | Orc1   | 94195  | ORC3     | origin recognition complex, subunit 3                                                                          | ENSG00000135336     |
| Q9Z1N2 | Orc1   | 34679  | ORC5     | origin recognition complex, subunit 5                                                                          | ENSG00000164815     |
| Q9Z1N2 | Orc1   | 33609  | LRWD1    | leucine-rich repeats and WD repeat domain containing 1                                                         | ENSG00000161036     |
| Q9Z1N2 | Orc1   | 98628  | ORC1     | origin recognition complex, subunit 1                                                                          | ENSG00000085840     |
| P53347 | Osm    | 182517 | Il6st    | interleukin 6 signal transducer                                                                                | ENSMUSG00000021756  |
| Q99NE9 | Pbx4   | 189502 | Nfe2     | nuclear factor, erythroid derived 2                                                                            | ENSMUSG00000058794  |
| Q99NE9 | Pbx4   | 152330 | Meis1    | Meis homeobox 1                                                                                                | ENSMUSG00000020160  |

|        |         |        |         |                                                                             |                     |
|--------|---------|--------|---------|-----------------------------------------------------------------------------|---------------------|
| Q99NE9 | Pbx4    | 163580 | Ssbp4   | single stranded DNA binding protein 4                                       | ENSMUSG00000070003  |
| Q99NE9 | Pbx4    | 146061 | Meis3   | Meis homeobox 3                                                             | ENSMUSG000000041420 |
| Q99NE9 | Pbx4    | 174161 | Tcf3    | transcription factor 3                                                      | ENSMUSG000000020167 |
| Q99NE9 | Pbx4    | 149671 | Pknox2  | Pbx/knotted 1 homeobox 2                                                    | ENSMUSG000000035934 |
| Q99NE9 | Pbx4    | 197577 | Meis2   | Meis homeobox 2                                                             | ENSMUSG000000027210 |
| Q99NE9 | Pbx4    | 204364 | Polr2j  | polymerase (RNA) II (DNA directed) polypeptide J                            | ENSMUSG000000039771 |
| Q99NE9 | Pbx4    | 158566 | Jdp2    | Jun dimerization protein 2                                                  | ENSMUSG000000034271 |
| Q61990 | Pcbp2   | 178868 | Pik3r1  | phosphatidylinositol 3-kinase, regulatory subunit, polypeptide gamma        | ENSMUSG000000041417 |
| Q61990 | Pcbp2   | 173713 | Cebpa   | CCAAT/enhancer binding protein (C/EBP), alpha                               | ENSMUSG000000034957 |
| Q61990 | Pcbp2   | 223547 | Mir328  | microRNA 328                                                                | ENSMUSG000000070130 |
| Q61990 | Pcbp2   | 188971 | Tarbp2  | TAR (HIV) RNA binding protein 2                                             | ENSMUSG000000023051 |
| Q61990 | Pcbp2   | 131332 | Flnc    | filamin C, gamma                                                            | ENSMUSG000000068699 |
| Q61990 | Pcbp2   | 193395 | Csda    | cold shock domain protein A                                                 | ENSMUSG000000030189 |
| Q8VHR0 | Pcdh18  | 169389 | Dab1    | disabled homolog 1 (Drosophila)                                             | ENSMUSG000000028519 |
| Q8VHR0 | Pcdh18  | 168935 | Ap1p1   | amyloid beta (A4) precursor-like protein 1                                  | ENSMUSG00000006651  |
| Q811Q9 | Pcyt1b  | 7590   | ACTB    | actin, beta                                                                 | ENSG00000075624     |
| Q9JK42 | Pdk2    | 164118 | Pik3r2  | phosphatidylinositol 3-kinase, regulatory subunit, polypeptide beta         | ENSMUSG000000031834 |
| Q9JIL4 | Pdzk1   | 155530 | Slc34a1 | solute carrier family 34 (sodium phosphate), member 1                       | ENSMUSG000000021490 |
| Q9JIL4 | Pdzk1   | 137697 | Slc17a1 | solute carrier family 17 (sodium phosphate), member 1                       | ENSMUSG000000021335 |
| Q9JIL4 | Pdzk1   | 37713  | CFTR    | cystic fibrosis transmembrane conductance regulator (ATF)                   | ENSG00000001626     |
| Q9JIL4 | Pdzk1   | 167051 | Slc9a3  | solute carrier family 9 (sodium/hydrogen exchanger), member 3               | ENSMUSG000000036123 |
| Q69Z50 | Pdzrn3  | 78880  | BMPR2   | bone morphogenetic protein receptor, type II (serine/threonine kinase)      | ENSG000000204217    |
| Q69Z50 | Pdzrn3  | 158574 | Bmpr2   | bone morphogenetic protein receptor, type II (serine/threonine kinase)      | ENSMUSG000000067336 |
| Q69Z50 | Pdzrn3  | 197628 | Sh3qlb1 | SH3-domain GRB2-like B1 (endophilin)                                        | ENSMUSG000000037062 |
| Q69Z50 | Pdzrn3  | 271528 | Mos     | Moloney sarcoma oncogene                                                    | ENSMUSG000000078365 |
| Q69Z50 | Pdzrn3  | 149050 | Pmpca   | peptidase (mitochondrial processing) alpha                                  | ENSMUSG000000026926 |
| Q69Z50 | Pdzrn3  | 121561 | Lsp1    | lymphocyte specific 1                                                       | ENSMUSG000000018819 |
| Q69Z50 | Pdzrn3  | 177408 | Twf1    | twinfilin, actin-binding protein, homolog 1 (Drosophila)                    | ENSMUSG000000022451 |
| Q69Z50 | Pdzrn3  | 198834 | Ccdc89  | coiled-coil domain containing 89                                            | ENSMUSG000000044362 |
| Q69Z50 | Pdzrn3  | 165484 | Rabgqta | Rab geranylgeranyl transferase, a subunit                                   | ENSMUSG000000040472 |
| Q69Z50 | Pdzrn3  | 196604 | Foxc2   | forkhead box C2                                                             | ENSMUSG000000046714 |
| Q69Z50 | Pdzrn3  | 127807 | Map3k8  | mitogen-activated protein kinase kinase kinase 8                            | ENSMUSG000000024235 |
| Q69Z50 | Pdzrn3  | 191539 | Trpc1   | transient receptor potential cation channel, subfamily C, member 1          | ENSMUSG000000032839 |
| Q9EQ61 | Pes1    | 155117 | Bop1    | block of proliferation 1                                                    | ENSMUSG000000022557 |
| P12382 | Pfkl    | 179972 | Pfkm    | phosphofruktokinase, muscle                                                 | ENSMUSG000000033065 |
| P12382 | Pfkl    | 141537 | Foxa1   | forkhead box A1                                                             | ENSMUSG000000035451 |
| P12382 | Pfkl    | 144904 | Grin1   | glutamate receptor, ionotropic, NMDA1 (zeta 1)                              | ENSMUSG000000026959 |
| Q9WUA3 | Pfkip   | 171427 | Btk     | Bruton agammaglobulinemia tyrosine kinase                                   | ENSMUSG000000031264 |
| Q9WUA3 | Pfkip   | 196509 | Irf8    | interferon regulatory factor 8                                              | ENSMUSG000000041515 |
| O35904 | Pik3cd  | 212024 | Hras1   | Harvey rat sarcoma virus oncogene 1                                         | ENSMUSG000000025499 |
| O35904 | Pik3cd  | 178868 | Pik3r1  | phosphatidylinositol 3-kinase, regulatory subunit, polypeptide gamma        | ENSMUSG000000041417 |
| O35904 | Pik3cd  | 25037  | PIK3R1  | phosphoinositide-3-kinase, regulatory subunit 1 (alpha)                     | ENSG00000145675     |
| O35904 | Pik3cd  | 129818 | Eras    | ES cell-expressed Ras                                                       | ENSMUSG000000031160 |
| O35904 | Pik3cd  | 133881 | Pik3cq  | phosphoinositide-3-kinase, catalytic, gamma polypeptide                     | ENSMUSG000000020573 |
| Q9JHG7 | Pik3cq  | 186954 | Ldha    | lactate dehydrogenase A                                                     | ENSMUSG000000063229 |
| Q9JHG7 | Pik3cq  | 180182 | Wipf1   | WAS/WASL interacting protein family, member 1                               | ENSMUSG000000075284 |
| Q9JHG7 | Pik3cq  | 191117 | Lck     | lymphocyte protein tyrosine kinase                                          | ENSMUSG000000000409 |
| Q9JHG7 | Pik3cq  | 145089 | Zap70   | zeta-chain (TCR) associated protein kinase                                  | ENSMUSG000000026117 |
| Q9JHG7 | Pik3cq  | 178777 | Gna11   | guanine nucleotide binding protein, alpha 11                                | ENSMUSG000000034781 |
| Q9JHG7 | Pik3cq  | 205458 | Mertk   | c-mer proto-oncogene tyrosine kinase                                        | ENSMUSG000000014361 |
| Q9JHG7 | Pik3cq  | 178868 | Pik3r1  | phosphatidylinositol 3-kinase, regulatory subunit, polypeptide gamma        | ENSMUSG000000041417 |
| Q9JHG7 | Pik3cq  | 129419 | Adrbk1  | adrenergic receptor kinase, beta 1                                          | ENSMUSG000000024858 |
| Q9JHG7 | Pik3cq  | 205331 | Pik3cd  | phosphatidylinositol 3-kinase catalytic delta polypeptide                   | ENSMUSG000000039936 |
| Q9JHG7 | Pik3cq  | 207234 | Pde3b   | phosphodiesterase 3B, cGMP-inhibited                                        | ENSMUSG000000030671 |
| Q9JHG7 | Pik3cq  | 188800 | Pik3r6  | phosphoinositide-3-kinase, regulatory subunit 6                             | ENSMUSG000000046207 |
| Q9JHG7 | Pik3cq  | 189999 | Cxcr4   | chemokine (C-X-C motif) receptor 4                                          | ENSMUSG000000045382 |
| Q9JHG7 | Pik3cq  | 209098 | Flt1    | FMS-like tyrosine kinase 1                                                  | ENSMUSG000000029648 |
| Q9JHG7 | Pik3cq  | 188688 | Pik3r5  | phosphoinositide-3-kinase, regulatory subunit 5, p101                       | ENSMUSG000000020901 |
| O08908 | Pik3r2  | 209439 | Pdk2    | pyruvate dehydrogenase kinase, isoenzyme 2                                  | ENSMUSG000000038967 |
| O08908 | Pik3r2  | 178827 | Brd7    | bromodomain containing 7                                                    | ENSMUSG000000031660 |
| O08908 | Pik3r2  | 169560 | S100a10 | S100 calcium binding protein A10 (calpactin)                                | ENSMUSG000000041959 |
| O08908 | Pik3r2  | 207118 | Card11  | caspase recruitment domain family, member 11                                | ENSMUSG000000036526 |
| O08908 | Pik3r2  | 191455 | Sh3ql1  | SH3-domain GRB2-like 1                                                      | ENSMUSG000000032000 |
| O08908 | Pik3r2  | 212053 | Becn1   | beclin 1, autophagy related                                                 | ENSMUSG000000035086 |
| O08908 | Pik3r2  | 175696 | Hook2   | hook homolog 2 (Drosophila)                                                 | ENSMUSG000000052566 |
| O08908 | Pik3r2  | 172083 | Kit     | kit oncogene                                                                | ENSMUSG00000005672  |
| O08908 | Pik3r2  | 195445 | NfkB1   | nuclear factor of kappa light polypeptide gene enhancer in B-cells 1        | ENSMUSG000000028163 |
| O08908 | Pik3r2  | 158468 | Axl     | AXL receptor tyrosine kinase                                                | ENSMUSG000000002602 |
| O08908 | Pik3r2  | 200571 | Crk     | v-crk sarcoma virus CT10 oncogene homolog (avian)                           | ENSMUSG000000017776 |
| O08908 | Pik3r2  | 193824 | Avil    | advillin                                                                    | ENSMUSG000000025432 |
| O08908 | Pik3r2  | 211991 | Ywhab   | tyrosine 3-monooxygenase/tryptophan 5-monooxygenase activator protein 1     | ENSMUSG000000018326 |
| O08908 | Pik3r2  | 153069 | Plec    | plectin                                                                     | ENSMUSG000000022565 |
| O08908 | Pik3r2  | 152570 | Ywhah   | tyrosine 3-monooxygenase/tryptophan 5-monooxygenase activator protein 2     | ENSMUSG000000018965 |
| O08908 | Pik3r2  | 135418 | Ywhaz   | tyrosine 3-monooxygenase/tryptophan 5-monooxygenase activator protein 3     | ENSMUSG000000022285 |
| O08908 | Pik3r2  | 130670 | Ywhaq   | tyrosine 3-monooxygenase/tryptophan 5-monooxygenase activator protein 4     | ENSMUSG000000076432 |
| O08908 | Pik3r2  | 204179 | Ywhag   | tyrosine 3-monooxygenase/tryptophan 5-monooxygenase activator protein 5     | ENSMUSG000000051391 |
| O08908 | Pik3r2  | 200597 | Ywhae   | tyrosine 3-monooxygenase/tryptophan 5-monooxygenase activator protein 6     | ENSMUSG000000020849 |
| O08908 | Pik3r2  | 155970 | Cbl     | Casitas B-lineage lymphoma                                                  | ENSMUSG000000034342 |
| O08908 | Pik3r2  | 196834 | Ptpn11  | protein tyrosine phosphatase, non-receptor type 11                          | ENSMUSG000000043733 |
| O08908 | Pik3r2  | 214339 | Grb2    | growth factor receptor bound protein 2                                      | ENSMUSG000000059923 |
| O08908 | Pik3r2  | 160094 | Eif2s3x | eukaryotic translation initiation factor 2, subunit 3, structural isoform 3 | ENSMUSG000000035150 |
| O08908 | Pik3r2  | 164495 | Shc1    | src homology 2 domain-containing transforming protein C                     | ENSMUSG000000042626 |
| O08908 | Pik3r2  | 186954 | Ldha    | lactate dehydrogenase A                                                     | ENSMUSG000000063229 |
| O08908 | Pik3r2  | 199566 | Gab2    | growth factor receptor bound protein 2-associated protein 1                 | ENSMUSG000000004508 |
| O08908 | Pik3r2  | 163115 | Socs6   | suppressor of cytokine signaling 6                                          | ENSMUSG000000056153 |
| Q3U6Q4 | Pik3r6  | 133881 | Pik3cq  | phosphoinositide-3-kinase, catalytic, gamma polypeptide                     | ENSMUSG000000020573 |
| Q3U6Q4 | Pik3r6  | 188688 | Pik3r5  | phosphoinositide-3-kinase, regulatory subunit 5, p101                       | ENSMUSG000000020901 |
| Q70172 | Pip4k2a | 201554 | Git1    | G protein-coupled receptor kinase-interactor 1                              | ENSMUSG000000011877 |
| P70181 | Pip5k1b | 176247 | Clic1   | chloride intracellular channel 1                                            | ENSMUSG00000007041  |

|        |         |        |              |                                                                    |                     |
|--------|---------|--------|--------------|--------------------------------------------------------------------|---------------------|
| P70181 | Pip5k1b | 196825 | Clic4        | chloride intracellular channel 4 (mitochondrial)                   | ENSMUSG000000037242 |
| P70181 | Pip5k1b | 136330 | Ifrd1        | interferon-related developmental regulator 1                       | ENSMUSG00000001627  |
| O55176 | Pja1    | 160245 | Maged1       | melanoma antigen, family D, 1                                      | ENSMUSG000000025151 |
| O55176 | Pja1    | 153222 | Msx2         | homeobox, msh-like 2                                               | ENSMUSG000000021469 |
| Q9ESG9 | Pkmyt1  | 175763 | Tal1         | T-cell acute lymphocytic leukemia 1                                | ENSMUSG000000028717 |
| O70477 | Pknx1   | 203379 | Pbx1         | pre B-cell leukemia transcription factor 1                         | ENSMUSG000000052534 |
| O70477 | Pknx1   | 152330 | Meis1        | Meis homeobox 1                                                    | ENSMUSG000000020160 |
| O70477 | Pknx1   | 172072 | Pbx2         | pre B-cell leukemia transcription factor 2                         | ENSMUSG000000034673 |
| O70477 | Pknx1   | 155900 | Rps3a        | ribosomal protein S3A                                              | ENSMUSG000000028081 |
| O70477 | Pknx1   | 162874 | Pbx3         | pre B-cell leukemia transcription factor 3                         | ENSMUSG000000038718 |
| O70477 | Pknx1   | 196765 | Mybbp1a      | MYB binding protein (P160) 1a                                      | ENSMUSG000000040463 |
| O70477 | Pknx1   | 207470 | Actb         | actin, beta                                                        | ENSMUSG000000029580 |
| O70477 | Pknx1   | 158163 | Myh9         | myosin, heavy polypeptide 9, non-muscle                            | ENSMUSG000000024443 |
| O70477 | Pknx1   | 176259 | Gnrh1        | gonadotropin releasing hormone 1                                   | ENSMUSG000000015812 |
| P51432 | P1cb3   | 9763   | SLC9A3R2     | solute carrier family 9 (sodium/hydrogen exchanger), member 2      | ENSG000000065054    |
| P51432 | P1cb3   | 187635 | Ptpn6        | protein tyrosine phosphatase, non-receptor type 6                  | ENSMUSG000000042666 |
| Q8CIH5 | P1ca2   | 196982 | Ndc80        | NDC80 homolog, kinetochore complex component (S. cerevisiae)       | ENSMUSG000000024056 |
| Q8CIH5 | P1ca2   | 164316 | Gsn          | gelsolin                                                           | ENSMUSG000000026879 |
| Q8CIH5 | P1ca2   | 159207 | Uck1         | uridine-cytidine kinase 1                                          | ENSMUSG000000025550 |
| Q8CIH5 | P1ca2   | 185818 | Spry2        | sprouty homolog 2 (Drosophila)                                     | ENSMUSG000000022114 |
| Q8CIH5 | P1ca2   | 133351 | Trim27       | tripartite motif-containing 27                                     | ENSMUSG000000021326 |
| Q8CIH5 | P1ca2   | 155134 | Flna         | filamin, alpha                                                     | ENSMUSG000000031328 |
| Q8CIH5 | P1ca2   | 165049 | Fn1          | fibronectin 1                                                      | ENSMUSG000000026193 |
| Q8CIH5 | P1ca2   | 193127 | Dvl2         | dishevelled 2, dsh homolog (Drosophila)                            | ENSMUSG000000020888 |
| Q8CIH5 | P1ca2   | 184645 | Cap1         | CAP, adenylate cyclase-associated protein 1 (yeast)                | ENSMUSG000000028656 |
| Q8CIH5 | P1ca2   | 203055 | Pdcd6ip      | programmed cell death 6 interacting protein                        | ENSMUSG000000032504 |
| Q8CIH5 | P1ca2   | 158171 | Spnb2        | spectrin beta 2                                                    | ENSMUSG000000020315 |
| Q8CIH5 | P1ca2   | 133180 | Bach2        | BTB and CNC homology 2                                             | ENSMUSG000000040270 |
| Q8CIH5 | P1ca2   | 165357 | Hax1         | HCLS1 associated X-1                                               | ENSMUSG000000027944 |
| Q8CIH5 | P1ca2   | 158588 | Tox4         | TOX high mobility group box family member 4                        | ENSMUSG000000016831 |
| Q8CIH5 | P1ca2   | 190107 | Phc2         | polyhomeotic-like 2 (Drosophila)                                   | ENSMUSG000000028796 |
| Q8CIH5 | P1ca2   | 164322 | Zbtb7b       | zinc finger and BTB domain containing 7B                           | ENSMUSG000000028042 |
| Q8CIH5 | P1ca2   | 605271 | Dynl1b       | dynein light chain Tctex-type 1D                                   | ENSMUSG000000091454 |
| Q8CIH5 | P1ca2   | 178553 | Inpp5d       | inositol polyphosphate-5-phosphatase D                             | ENSMUSG000000026288 |
| Q8CIH5 | P1ca2   | 182475 | Sh3kbp1      | SH3-domain kinase binding protein 1                                | ENSMUSG000000040990 |
| Q8CIH5 | P1ca2   | 135050 | Reps1        | RalBP1 associated Eps domain containing protein                    | ENSMUSG000000019854 |
| Q8CIH5 | P1ca2   | 212256 | Nbr1         | neighbor of Brca1 gene 1                                           | ENSMUSG000000017119 |
| Q8CIH5 | P1ca2   | 142378 | Epor         | erythropoietin receptor                                            | ENSMUSG00000006235  |
| Q8CIH5 | P1ca2   | 205853 | Errf1        | ERBB receptor feedback inhibitor 1                                 | ENSMUSG000000028967 |
| Q8CIH5 | P1ca2   | 144636 | Sos2         | son of sevenless homolog 2 (Drosophila)                            | ENSMUSG000000034801 |
| Q8CIH5 | P1ca2   | 139703 | Epb4.1l2     | erythrocyte protein band 4.1-like 2                                | ENSMUSG000000019978 |
| Q8CIH5 | P1ca2   | 149554 | Fhl2         | four and a half LIM domains 2                                      | ENSMUSG00000008136  |
| Q8CIH5 | P1ca2   | 164070 | Cryab        | crystallin, alpha B                                                | ENSMUSG000000032060 |
| Q8CIH5 | P1ca2   | 205458 | Mertk        | c-mer proto-oncogene tyrosine kinase                               | ENSMUSG000000014361 |
| Q8CIH5 | P1ca2   | 165316 | Blnk         | B-cell linker                                                      | ENSMUSG000000061132 |
| Q8CIH5 | P1ca2   | 152695 | Sykb         | spleen tyrosine kinase                                             | ENSMUSG000000021457 |
| Q8CIH5 | P1ca2   | 171427 | Btk          | Bruton agammaglobulinemia tyrosine kinase                          | ENSMUSG000000031264 |
| Q8CIH5 | P1ca2   | 128365 | Lyn          | Yamaquchi sarcoma viral (v-yes-1) oncogene homolog                 | ENSMUSG000000042228 |
| Q8CIH5 | P1ca2   | 172522 | Blk          | B lymphoid kinase                                                  | ENSMUSG000000014453 |
| Q8CIH5 | P1ca2   | 144629 | Fyn          | Fyn proto-oncogene                                                 | ENSMUSG000000019843 |
| Q8CIH5 | P1ca2   | 53268  | CSF1R        | colony stimulating factor 1 receptor                               | ENSG00000182578     |
| Q8CIH5 | P1ca2   | 175763 | Tal1         | T-cell acute lymphocytic leukemia 1                                | ENSMUSG000000028717 |
| Q7TS11 | Plekhh1 | 165583 | Itk          | IL2-inducible T-cell kinase                                        | ENSMUSG000000020395 |
| Q9JIY0 | Plekho1 | 212192 | Ifi35        | interferon-induced protein 35                                      | ENSMUSG000000010358 |
| Q9JIY0 | Plekho1 | 169260 | Nmi          | N-myc (and STAT) interactor                                        | ENSMUSG000000026946 |
| Q8CGN5 | Plin1   | 205933 | Abhd5        | abhydrolase domain containing 5                                    | ENSMUSG000000032540 |
| P43883 | Plin2   | 141537 | Foxa1        | forkhead box A1                                                    | ENSMUSG000000035451 |
| P43883 | Plin2   | 205933 | Abhd5        | abhydrolase domain containing 5                                    | ENSMUSG000000032540 |
| P70206 | Plxna1  | 201210 | Plxnb1       | plexin B1                                                          | ENSMUSG000000053646 |
| P70206 | Plxna1  | 189765 | A530064D06R1 | RIKEN cDNA A530064D06 gene                                         | ENSMUSG000000043939 |
| P70206 | Plxna1  | 168769 | Tyrobp       | TYRO protein tyrosine kinase binding protein                       | ENSMUSG000000030579 |
| P70206 | Plxna1  | 160044 | Nrp2         | neuropilin 2                                                       | ENSMUSG000000025969 |
| P70206 | Plxna1  | 167260 | Npr1         | natriuretic peptide receptor 1                                     | ENSMUSG000000027931 |
| P70206 | Plxna1  | 201088 | Nrp1         | neuropilin 1                                                       | ENSMUSG000000025810 |
| Q9QY40 | Plxnb3  | 157390 | Arhgef11     | Rho guanine nucleotide exchange factor (GEF) 11                    | ENSMUSG000000041977 |
| Q8BZH4 | Pogz    | 187207 | Tcfcp2l1     | transcription factor CP2-like 1                                    | ENSMUSG000000026380 |
| Q8BZH4 | Pogz    | 189469 | Cbx5         | chromobox homolog 5 (Drosophila HP1a)                              | ENSMUSG000000009575 |
| Q6R3M4 | Poli    | 146762 | Rev1         | REV1 homolog (S. cerevisiae)                                       | ENSMUSG000000026082 |
| Q6R3M4 | Poli    | 64029  | UBC          | ubiquitin C                                                        | ENSG00000150991     |
| Q6R3M4 | Poli    | 50801  | PCNA         | proliferating cell nuclear antigen                                 | ENSG00000132646     |
| P70700 | Polr1b  | 212569 | Ubtf         | upstream binding transcription factor, RNA polymerase I            | ENSMUSG000000020923 |
| P70700 | Polr1b  | 129513 | Crebbp       | CREB binding protein                                               | ENSMUSG000000022521 |
| P70700 | Polr1b  | 15872  | RRN3         | RRN3 RNA polymerase I transcription factor homolog (S. cerevisiae) | ENSG000000085721    |
| P70700 | Polr1b  | 143810 | Polr1e       | polymerase (RNA) I polypeptide E                                   | ENSMUSG000000028318 |
| P70700 | Polr1b  | 134078 | Rrn3         | RRN3 RNA polymerase I transcription factor homolog (yeast)         | ENSMUSG000000022682 |
| P70700 | Polr1b  | 214048 | Gmeb2        | glucocorticoid modulatory element binding protein 2                | ENSMUSG000000038705 |
| P70700 | Polr1b  | 207470 | Actb         | actin, beta                                                        | ENSMUSG000000029580 |
| Q8K202 | Polr1e  | 212569 | Ubtf         | upstream binding transcription factor, RNA polymerase I            | ENSMUSG000000020923 |
| Q8K202 | Polr1e  | 205730 | Polr1b       | polymerase (RNA) I polypeptide B                                   | ENSMUSG000000027395 |
| Q8K329 | Pom121  | 137550 | Nova1        | neuro-oncological ventral antigen 1                                | ENSMUSG000000021047 |
| Q9JJJ7 | Porcn   | 211637 | Stat3        | signal transducer and activator of transcription 3                 | ENSMUSG000000040400 |
| Q9JJJ7 | Porcn   | 182694 | Wnt5b        | wingless-related MMTV integration site 5B                          | ENSMUSG000000030170 |
| Q9JJJ7 | Porcn   | 170090 | Wnt7a        | wingless-related MMTV integration site 7A                          | ENSMUSG000000030093 |
| Q9JJJ7 | Porcn   | 198435 | Wnt4         | wingless-related MMTV integration site 4                           | ENSMUSG000000036856 |
| Q9JJJ7 | Porcn   | 213058 | Wnt3         | wingless-related MMTV integration site 3                           | ENSMUSG00000000125  |
| Q9JJJ7 | Porcn   | 141666 | Wnt5a        | wingless-related MMTV integration site 5A                          | ENSMUSG000000021994 |
| Q9JJJ7 | Porcn   | 168736 | Wnt6         | wingless-related MMTV integration site 6                           | ENSMUSG000000033227 |
| Q9JJJ7 | Porcn   | 178528 | Wnt3a        | wingless-related MMTV integration site 3A                          | ENSMUSG000000009900 |
| Q9JJJ7 | Porcn   | 181251 | Wnt1         | wingless-related MMTV integration site 1                           | ENSMUSG000000022997 |

|        |          |        |          |                                                                                   |                      |
|--------|----------|--------|----------|-----------------------------------------------------------------------------------|----------------------|
| Q91J17 | Porcn    | 170604 | Wnt7b    | wingless-related MMTV integration site 7B                                         | ENSMUSG00000022382   |
| P60469 | Ppfa3    | 161623 | Stxbp1   | syntaxin binding protein 1                                                        | ENSMUSG00000026797   |
| P60469 | Ppfa3    | 179144 | Tubb5    | tubulin, beta 5                                                                   | ENSMUSG00000001525   |
| P60469 | Ppfa3    | 195526 | Lin7c    | lin-7 homolog C (C. elegans)                                                      | ENSMUSG000000027162  |
| P60469 | Ppfa3    | 207019 | Cltc     | clathrin, heavy polypeptide (Hc)                                                  | ENSMUSG000000047126  |
| P60469 | Ppfa3    | 191187 | Apba2    | amyloid beta (A4) precursor protein-binding, family A, member 2                   | ENSMUSG000000030519  |
| P60469 | Ppfa3    | 182740 | Lin7b    | lin-7 homolog B (C. elegans)                                                      | ENSMUSG00000003872   |
| P60469 | Ppfa3    | 140932 | Dst      | dystonin                                                                          | ENSMUSG000000026131  |
| P60469 | Ppfa3    | 188759 | Ppfa2    | protein tyrosine phosphatase, receptor type, f polypeptide                        | ENSMUSG000000053825  |
| P60469 | Ppfa3    | 182053 | Tuba1c   | tubulin, alpha 1C                                                                 | ENSMUSG000000043091  |
| P60469 | Ppfa3    | 133241 | Cask     | calcium/calmodulin-dependent serine protein kinase (MAC kinase)                   | ENSMUSG000000031012  |
| P60469 | Ppfa3    | 214779 | Actg1    | actin, gamma, cytoplasmic 1                                                       | ENSMUSG000000062825  |
| P60469 | Ppfa3    | 163852 | Calm1    | calmodulin 1                                                                      | ENSMUSG000000001175  |
| P60469 | Ppfa3    | 211468 | Cnp      | 2',3'-cyclic nucleotide 3' phosphodiesterase                                      | ENSMUSG000000006782  |
| P60469 | Ppfa3    | 207470 | Actb     | actin, beta                                                                       | ENSMUSG000000029580  |
| P60469 | Ppfa3    | 135538 | Syn1     | synapsin I                                                                        | ENSMUSG000000037217  |
| Q8BVQ5 | Ppme1    | 101377 | ATP1A1   | ATPase, Na <sup>+</sup> /K <sup>+</sup> transporting, alpha 1 polypeptide         | ENSG00000163399      |
| Q62415 | Ppp1r13b | 175763 | Tal1     | T-cell acute lymphocytic leukemia 1                                               | ENSMUSG000000028717  |
| Q6R891 | Ppp1r9b  | 197102 | Rgs2     | regulator of G-protein signaling 2                                                | ENSMUSG000000026360  |
| Q6R891 | Ppp1r9b  | 196509 | Irf8     | interferon regulatory factor 8                                                    | ENSMUSG000000041515  |
| Q6R891 | Ppp1r9b  | 184986 | Gnb5     | guanine nucleotide binding protein (G protein), beta 5                            | ENSMUSG000000032192  |
| Q6R891 | Ppp1r9b  | 213785 | Rgs9     | regulator of G-protein signaling 9                                                | ENSMUSG000000020599  |
| Q6R891 | Ppp1r9b  | 129419 | Adrbk1   | adrenergic receptor kinase, beta 1                                                | ENSMUSG000000024858  |
| Q6R891 | Ppp1r9b  | 130147 | Oprm1    | opioid receptor, mu 1                                                             | ENSMUSG000000007666  |
| Q6R891 | Ppp1r9b  | 105451 | RGS2     | regulator of G-protein signaling 2, 24kDa                                         | ENSG00000116741      |
| Q60996 | Ppp2r5c  | 163399 | Ccnq1    | cyclin G1                                                                         | ENSMUSG000000020326  |
| Q60996 | Ppp2r5c  | 180701 | Ccnq2    | cyclin G2                                                                         | ENSMUSG000000029385  |
| P63328 | Ppp3ca   | 38336  | FKBP8    | FK506 binding protein 8, 38kDa                                                    | ENSG00000105701      |
| P63328 | Ppp3ca   | 39495  | FKBP1A   | FK506 binding protein 1A, 12kDa                                                   | ENSG00000088832      |
| P63328 | Ppp3ca   | 189544 | Nfatc3   | nuclear factor of activated T-cells, cytoplasmic, calcineurin dependent 3         | ENSMUSG0000000031902 |
| P63328 | Ppp3ca   | 150003 | Myoz3    | myozenin 3                                                                        | ENSMUSG000000049173  |
| P63328 | Ppp3ca   | 135551 | Myoz1    | myozenin 1                                                                        | ENSMUSG000000068697  |
| P63328 | Ppp3ca   | 163739 | Gabbr2   | gamma-aminobutyric acid (GABA) A receptor, subunit beta 2                         | ENSMUSG000000007653  |
| P63328 | Ppp3ca   | 192048 | Myoz2    | myozenin 2                                                                        | ENSMUSG000000028116  |
| P63328 | Ppp3ca   | 163565 | Gabra1   | gamma-aminobutyric acid (GABA) A receptor, subunit alpha 1                        | ENSMUSG000000010803  |
| P63328 | Ppp3ca   | 163458 | Gabbr2   | gamma-aminobutyric acid (GABA) A receptor, subunit gamma 2                        | ENSMUSG000000020436  |
| P63328 | Ppp3ca   | 161232 | Cpeb3    | cytoplasmic polyadenylation element binding protein 3                             | ENSMUSG000000039652  |
| P63328 | Ppp3ca   | 174557 | Neur11a  | neuronal homolog 1A (Drosophila)                                                  | ENSMUSG000000006435  |
| P63328 | Ppp3ca   | 157046 | Hk1      | hexokinase 1                                                                      | ENSMUSG000000037012  |
| P63328 | Ppp3ca   | 183300 | Epn2     | epsin 2                                                                           | ENSMUSG000000001036  |
| P63328 | Ppp3ca   | 145820 | Camk2b   | calcium/calmodulin-dependent protein kinase II, beta                              | ENSMUSG000000057897  |
| P63328 | Ppp3ca   | 200728 | Uqcrc1   | ubiquinol-cytochrome c reductase core protein 1                                   | ENSMUSG000000025651  |
| P63328 | Ppp3ca   | 185482 | Hsp90ab1 | heat shock protein 90 alpha (cytosolic), class B member 1                         | ENSMUSG000000023944  |
| P63328 | Ppp3ca   | 144904 | Grin1    | glutamate receptor, ionotropic, NMDA1 (zeta 1)                                    | ENSMUSG000000026959  |
| Q60636 | Prdm1    | 144556 | Myc      | myelocytomatosis oncogene                                                         | ENSMUSG000000022346  |
| Q60636 | Prdm1    | 190689 | Nfat5    | nuclear factor of activated T-cells 5                                             | ENSMUSG000000003847  |
| Q60636 | Prdm1    | 194120 | Dusp16   | dual specificity phosphatase 16                                                   | ENSMUSG000000030203  |
| Q60636 | Prdm1    | 158538 | Fos      | FBJ osteosarcoma oncogene                                                         | ENSMUSG000000021250  |
| Q60636 | Prdm1    | 141793 | Irf4     | interferon regulatory factor 4                                                    | ENSMUSG000000021356  |
| Q60636 | Prdm1    | 55681  | IRF4     | interferon regulatory factor 4                                                    | ENSG00000137265      |
| Q60636 | Prdm1    | 190697 | Il10     | interleukin 10                                                                    | ENSMUSG000000016529  |
| Q9WUQ2 | Preb     | 37210  | PREB     | prolactin regulatory element binding                                              | ENSG00000138073      |
| Q9WUQ2 | Preb     | 78488  | TGFBR1   | transforming growth factor, beta receptor 1                                       | ENSG00000106799      |
| Q9WUQ2 | Preb     | 163580 | Ssbp4    | single stranded DNA binding protein 4                                             | ENSMUSG000000070003  |
| Q9WUQ2 | Preb     | 166578 | Trip13   | thyroid hormone receptor interactor 13                                            | ENSMUSG000000021569  |
| Q9DBC7 | Prkar1a  | 205438 | Taf15    | TAF15 RNA polymerase II, TATA box binding protein (TBP) associated factor 15      | ENSMUSG000000020680  |
| Q9DBC7 | Prkar1a  | 163061 | Uqcrb    | ubiquinol-cytochrome c reductase binding protein                                  | ENSMUSG000000021520  |
| Q9DBC7 | Prkar1a  | 167243 | Itqb2    | integrin beta 2                                                                   | ENSMUSG000000000290  |
| Q9DBC7 | Prkar1a  | 149554 | Fhl2     | four and a half LIM domains 2                                                     | ENSMUSG000000008136  |
| Q9DBC7 | Prkar1a  | 153066 | Ranbp2   | RAN binding protein 2                                                             | ENSMUSG000000003226  |
| Q9DBC7 | Prkar1a  | 157560 | Ylpm1    | YLP motif containing 1                                                            | ENSMUSG000000021244  |
| Q9DBC7 | Prkar1a  | 62465  | COX5B    | cytochrome c oxidase subunit Vb                                                   | ENSG00000135940      |
| Q9DBC7 | Prkar1a  | 46976  | CBFA2T3  | core-binding factor, runt domain, alpha subunit 2; translocator-associated with A | ENSG00000129993      |
| Q9DBC7 | Prkar1a  | 128910 | Akap4    | A kinase (PRKA) anchor protein 4                                                  | ENSMUSG000000050089  |
| Q9DBC7 | Prkar1a  | 173105 | Prkaca   | protein kinase, cAMP dependent, catalytic, alpha                                  | ENSMUSG000000005469  |
| POC605 | Prkq1    | 189483 | Ppp1r12a | protein phosphatase 1, regulatory (inhibitor) subunit 12A                         | ENSMUSG000000019907  |
| POC605 | Prkq1    | 158039 | Gkap1    | G kinase anchoring protein 1                                                      | ENSMUSG000000021552  |
| P48437 | Prox1    | 140814 | Hdac3    | histone deacetylase 3                                                             | ENSMUSG000000024454  |
| P15331 | Prph     | 22709  | AKT1     | v-akt murine thymoma viral oncogene homolog 1                                     | ENSG00000142208      |
| P15331 | Prph     | 184743 | Myo5a    | myosin VA                                                                         | ENSMUSG000000034593  |
| O55234 | Psmb5    | 160992 | Lmna     | lamin A                                                                           | ENSMUSG000000028063  |
| O55234 | Psmb5    | 201307 | Ubc      | ubiquitin C                                                                       | ENSMUSG000000008348  |
| O55234 | Psmb5    | 170858 | Ppp2ca   | protein phosphatase 2 (formerly 2A), catalytic subunit, alpha isoform             | ENSMUSG000000020349  |
| O55234 | Psmb5    | 176640 | Csnk2b   | casein kinase 2, beta polypeptide                                                 | ENSMUSG000000024387  |
| O55234 | Psmb5    | 175798 | Ppp2r2a  | protein phosphatase 2 (formerly 2A), regulatory subunit 2                         | ENSMUSG000000022052  |
| O55234 | Psmb5    | 141714 | Ppp2r1a  | protein phosphatase 2 (formerly 2A), regulatory subunit 1                         | ENSMUSG000000007564  |
| O55234 | Psmb5    | 173105 | Prkaca   | protein kinase, cAMP dependent, catalytic, alpha                                  | ENSMUSG000000005469  |
| O55234 | Psmb5    | 207213 | Psmal1   | proteasome (prosome, macropain) subunit, alpha type 1                             | ENSMUSG000000030751  |
| O55234 | Psmb5    | 131624 | Psmal2   | proteasome (prosome, macropain) subunit, alpha type 2                             | ENSMUSG000000015671  |
| O55234 | Psmb5    | 146271 | Psmal3   | proteasome (prosome, macropain) subunit, alpha type 3                             | ENSMUSG000000006073  |
| O55234 | Psmb5    | 186688 | Psmal5   | proteasome (prosome, macropain) subunit, alpha type 5                             | ENSMUSG000000068749  |
| O55234 | Psmb5    | 167326 | Psmal4   | proteasome (prosome, macropain) subunit, alpha type 4                             | ENSMUSG000000032301  |
| O55234 | Psmb5    | 213730 | Psmal7   | proteasome (prosome, macropain) subunit, alpha type 7                             | ENSMUSG000000027566  |
| O55234 | Psmb5    | 140647 | Psmal6   | proteasome (prosome, macropain) subunit, alpha type 6                             | ENSMUSG000000021024  |
| O55234 | Psmb5    | 139866 | Psmbl1   | proteasome (prosome, macropain) subunit, beta type 1                              | ENSMUSG000000014769  |
| O55234 | Psmb5    | 189115 | Psmbl2   | proteasome (prosome, macropain) subunit, beta type 2                              | ENSMUSG000000028837  |
| O55234 | Psmb5    | 210309 | Psmbl3   | proteasome (prosome, macropain) subunit, beta type 3                              | ENSMUSG000000069744  |
| O55234 | Psmb5    | 189173 | Psmbl10  | proteasome (prosome, macropain) subunit, beta type 10                             | ENSMUSG000000031897  |
| O55234 | Psmb5    | 170564 | Psmbl9   | proteasome (prosome, macropain) subunit, beta type 9 (liver)                      | ENSMUSG000000024337  |

|        |        |        |          |                                                            |                     |
|--------|--------|--------|----------|------------------------------------------------------------|---------------------|
| O55234 | Psmb5  | 170702 | Psmb8    | proteasome (prosome, macropain) subunit, beta type 8 (     | ENSMUSG00000024338  |
| O55234 | Psmb5  | 166732 | Psmb7    | proteasome (prosome, macropain) subunit, beta type 7       | ENSMUSG00000026750  |
| O55234 | Psmb5  | 194623 | Psmb6    | proteasome (prosome, macropain) subunit, beta type 6       | ENSMUSG00000018286  |
| O55234 | Psmb5  | 170872 | Psmb4    | proteasome (prosome, macropain) subunit, beta type 4       | ENSMUSG00000005779  |
| Q91Z31 | Ptbp2  | 156493 | Mylk     | myosin, light polypeptide kinase                           | ENSMUSG00000022836  |
| Q91Z31 | Ptbp2  | 185563 | Aicda    | activation-induced cytidine deaminase                      | ENSMUSG00000040627  |
| Q91Z31 | Ptbp2  | 174830 | Trip12   | thyroid hormone receptor interactor 12                     | ENSMUSG00000026219  |
| Q91Z31 | Ptbp2  | 150449 | Wapal    | wings apart-like homolog (Drosophila)                      | ENSMUSG00000041408  |
| Q91Z31 | Ptbp2  | 129416 | Dnase1   | deoxyribonuclease I                                        | ENSMUSG00000005980  |
| Q91Z31 | Ptbp2  | 197552 | Smarcc2  | SWI/SNF related, matrix associated, actin dependent regu   | ENSMUSG00000025369  |
| Q91Z31 | Ptbp2  | 179125 | Pold1    | polymerase (DNA directed), delta 1, catalytic subunit      | ENSMUSG00000038644  |
| Q91Z31 | Ptbp2  | 132917 | Cct5     | chaperonin containing Tcp1, subunit 5 (epsilon)            | ENSMUSG00000022234  |
| Q91Z31 | Ptbp2  | 129626 | Pdia6    | protein disulfide isomerase associated 6                   | ENSMUSG00000020571  |
| Q91Z31 | Ptbp2  | 196509 | Irf8     | interferon regulatory factor 8                             | ENSMUSG00000041515  |
| Q91Z31 | Ptbp2  | 130609 | Glyr1    | glyoxylate reductase 1 homolog (Arabidopsis)               | ENSMUSG00000022536  |
| Q91Z31 | Ptbp2  | 168861 | Nfkbid   | nuclear factor of kappa light polypeptide gene enhancer in | ENSMUSG00000036931  |
| Q91Z31 | Ptbp2  | 176913 | Pdcd4    | programmed cell death 4                                    | ENSMUSG00000024975  |
| Q91Z31 | Ptbp2  | 204629 | Cct6b    | chaperonin containing Tcp1, subunit 6b (zeta)              | ENSMUSG00000020698  |
| Q91Z31 | Ptbp2  | 188705 | Actr3    | ARP3 actin-related protein 3 homolog (yeast)               | ENSMUSG00000026341  |
| Q91Z31 | Ptbp2  | 190814 | Rbbp4    | retinoblastoma binding protein 4                           | ENSMUSG00000057236  |
| Q91Z31 | Ptbp2  | 196636 | Metap1   | methionyl aminopeptidase 1                                 | ENSMUSG00000005813  |
| Q91Z31 | Ptbp2  | 214779 | Actp1    | actin, gamma, cytoplasmic 1                                | ENSMUSG00000062825  |
| Q91Z31 | Ptbp2  | 139206 | Orc5     | origin recognition complex, subunit 5                      | ENSMUSG00000029012  |
| Q91Z31 | Ptbp2  | 159868 | Pdk3     | pyruvate dehydrogenase kinase, isoenzyme 3                 | ENSMUSG00000035232  |
| Q91Z31 | Ptbp2  | 137550 | Nova1    | neuro-oncological ventral antigen 1                        | ENSMUSG00000021047  |
| Q06180 | Ptpn2  | 216094 | Cebpd    | CCAAT/enhancer binding protein (C/EBP), delta              | ENSMUSG00000071637  |
| Q06180 | Ptpn2  | 211618 | Stat5a   | signal transducer and activator of transcription 5A        | ENSMUSG00000004043  |
| Q06180 | Ptpn2  | 211594 | Stat5b   | signal transducer and activator of transcription 5B        | ENSMUSG00000020919  |
| P18052 | Ptpra  | 173444 | Chl1     | cell adhesion molecule with homology to L1CAM              | ENSMUSG00000030077  |
| P18052 | Ptpra  | 74081  | SRC      | v-src sarcoma (Schmidt-Ruppin A-2) viral oncogene hom      | ENSG00000197122     |
| P18052 | Ptpra  | 141714 | Ppp2r1a  | protein phosphatase 2 (formerly 2A), regulatory subunit A  | ENSMUSG00000007564  |
| P18052 | Ptpra  | 214339 | Grb2     | growth factor receptor bound protein 2                     | ENSMUSG00000059923  |
| P18052 | Ptpra  | 208976 | Prkcb    | protein kinase C, beta                                     | ENSMUSG00000052889  |
| Q80U78 | Pum1   | 202439 | Mfap1a   | microfibrillar-associated protein 1A                       | ENSMUSG00000068479  |
| Q80U78 | Pum1   | 210259 | Srcin1   | SRC kinase signaling inhibitor 1                           | ENSMUSG00000038453  |
| Q80U78 | Pum1   | 163852 | Calm1    | calmodulin 1                                               | ENSMUSG00000001175  |
| Q80U78 | Pum1   | 155439 | Afq3l2   | AFG3(ATPase family gene 3)-like 2 (yeast)                  | ENSMUSG00000024527  |
| Q80U78 | Pum1   | 214779 | Actp1    | actin, gamma, cytoplasmic 1                                | ENSMUSG00000062825  |
| Q80U78 | Pum1   | 144350 | Tubb2c   | tubulin, beta 2C                                           | ENSMUSG00000036752  |
| Q80U78 | Pum1   | 174739 | Sv2a     | synaptic vesicle glycoprotein 2 a                          | ENSMUSG00000038486  |
| Q80U78 | Pum1   | 182053 | Tuba1c   | tubulin, alpha 1C                                          | ENSMUSG00000043091  |
| Q80U78 | Pum1   | 145005 | Asap1    | ArfGAP with SH3 domain, ankyrin repeat and PH domain1      | ENSMUSG00000022377  |
| Q80U78 | Pum1   | 191734 | Lyz2     | lysozyme 2                                                 | ENSMUSG00000069516  |
| Q80U78 | Pum1   | 176809 | Pak3     | p21 protein (Cdc42/Rac)-activated kinase 3                 | ENSMUSG00000031284  |
| Q80U78 | Pum1   | 132947 | Arhgef7  | Rho guanine nucleotide exchange factor (GEF7)              | ENSMUSG000000031511 |
| Q80U78 | Pum1   | 201554 | Git1     | G protein-coupled receptor kinase-interactor 1             | ENSMUSG00000011877  |
| P42669 | Pura   | 149366 | Fmr1     | fragile X mental retardation syndrome 1 homolog            | ENSMUSG00000000838  |
| P42669 | Pura   | 160472 | Cdk1     | cyclin-dependent kinase 1                                  | ENSMUSG00000019942  |
| P42669 | Pura   | 175446 | Ccne1    | cyclin E1                                                  | ENSMUSG00000002068  |
| P42669 | Pura   | 138776 | Ccna2    | cyclin A2                                                  | ENSMUSG00000027715  |
| P42669 | Pura   | 212973 | Ccnd1    | cyclin D1                                                  | ENSMUSG00000070348  |
| P42669 | Pura   | 200597 | Ywhae    | tyrosine 3-monooxygenase/tryptophan 5-monooxygenase        | ENSMUSG00000020849  |
| P42669 | Pura   | 170398 | Ccnh     | cyclin H                                                   | ENSMUSG000000021548 |
| P42669 | Pura   | 194056 | Cdk4     | cyclin-dependent kinase 4                                  | ENSMUSG00000006728  |
| P42669 | Pura   | 178679 | Ccnb1    | cyclin B1                                                  | ENSMUSG000000041431 |
| P42669 | Pura   | 210416 | E2f1     | E2F transcription factor 1                                 | ENSMUSG00000027490  |
| P42669 | Pura   | 198142 | Cdk2     | cyclin-dependent kinase 2                                  | ENSMUSG00000025358  |
| P42669 | Pura   | 137249 | Hist1h1a | histone cluster 1, H1a                                     | ENSMUSG00000049539  |
| P42669 | Pura   | 141112 | Cdk5     | cyclin-dependent kinase 5                                  | ENSMUSG00000028969  |
| Q8CE46 | Pus7l  | 175763 | Tal1     | T-cell acute lymphocytic leukemia 1                        | ENSMUSG00000028717  |
| Q8BX57 | Pxk    | 196509 | Irf8     | interferon regulatory factor 8                             | ENSMUSG00000041515  |
| Q05144 | Rac2   | 199974 | Pak1     | p21 protein (Cdc42/Rac)-activated kinase 1                 | ENSMUSG00000030774  |
| Q05144 | Rac2   | 203203 | Nos2     | nitric oxide synthase 2, inducible                         | ENSMUSG00000020826  |
| Q05144 | Rac2   | 175763 | Tal1     | T-cell acute lymphocytic leukemia 1                        | ENSMUSG00000028717  |
| Q05144 | Rac2   | 3485   | SMAD4    | SMAD family member 4                                       | ENSG00000141646     |
| P60764 | Rac3   | 195168 | Arhgdib  | Rho, GDP dissociation inhibitor (GDI) beta                 | ENSMUSG00000030220  |
| P60764 | Rac3   | 214842 | Arhgdia  | Rho GDP dissociation inhibitor (GDI) alpha                 | ENSMUSG00000025132  |
| P60764 | Rac3   | 191571 | Khdrbs1  | KH domain containing, RNA binding, signal transduction a   | ENSMUSG00000028790  |
| Q61550 | Rad21  | 192196 | Irfnq    | interferon gamma                                           | ENSMUSG000000055170 |
| Q61550 | Rad21  | 33417  | RAD21    | RAD21 homolog (S. pombe)                                   | ENSG00000164754     |
| Q61550 | Rad21  | 89416  | SMC3     | structural maintenance of chromosomes 3                    | ENSG00000108055     |
| Q61550 | Rad21  | 80903  | WAPAL    | wings apart-like homolog (Drosophila)                      | ENSG00000062650     |
| Q61550 | Rad21  | 14730  | PDS5A    | PDS5, regulator of cohesion maintenance, homolog A (S.     | ENSG00000121892     |
| Q61550 | Rad21  | 69775  | SMC1A    | structural maintenance of chromosomes 1A                   | ENSG00000072501     |
| Q61550 | Rad21  | 57884  | STAG1    | stromal antigen 1                                          | ENSG00000118007     |
| Q61550 | Rad21  | 23233  | PDS5B    | PDS5, regulator of cohesion maintenance, homolog B (S.     | ENSG00000083642     |
| Q61550 | Rad21  | 85176  | STAG2    | stromal antigen 2                                          | ENSG00000101972     |
| P21784 | Raq2   | 193190 | Raq1     | recombination activating gene 1                            | ENSMUSG000000061311 |
| P21784 | Raq2   | 136895 | Myb      | myeloblastosis oncogene                                    | ENSMUSG00000019982  |
| P21784 | Raq2   | 143469 | Pax5     | paired box gene 5                                          | ENSMUSG000000014030 |
| P21784 | Raq2   | 194292 | Lef1     | lymphoid enhancer binding factor 1                         | ENSMUSG00000027985  |
| P21784 | Raq2   | 195445 | Nfkb1    | nuclear factor of kappa light polypeptide gene enhancer in | ENSMUSG00000028163  |
| P21784 | Raq2   | 132298 | Rela     | v-rel reticuloendotheliosis viral oncogene homolog A (avia | ENSMUSG00000024927  |
| P21784 | Raq2   | 155648 | Rel      | reticuloendotheliosis oncogene                             | ENSMUSG00000020275  |
| P21784 | Raq2   | 155739 | Prf1     | perforin 1 (pore forming protein)                          | ENSMUSG000000037202 |
| P21784 | Raq2   | 128953 | Skp2     | S-phase kinase-associated protein 2 (p45)                  | ENSMUSG00000054115  |
| P21784 | Raq2   | 175693 | Smad3    | MAD homolog 3 (Drosophila)                                 | ENSMUSG00000032402  |
| P69566 | Ranbp9 | 196500 | Grm2     | glutamate receptor, metabotropic 2                         | ENSMUSG00000023192  |
| P69566 | Ranbp9 | 130430 | Grm8     | glutamate receptor, metabotropic 8                         | ENSMUSG00000024211  |

|        |         |        |           |                                                                                  |                     |
|--------|---------|--------|-----------|----------------------------------------------------------------------------------|---------------------|
| P69566 | Ranbp9  | 167476 | Lrp1b     | low density lipoprotein-related protein 1B (deleted in tumor)                    | ENSMUSG00000049252  |
| P69566 | Ranbp9  | 191212 | Lrp4      | low density lipoprotein receptor-related protein 4                               | ENSMUSG00000027253  |
| P69566 | Ranbp9  | 149366 | Fmr1      | fragile X mental retardation syndrome 1 homolog                                  | ENSMUSG00000000838  |
| Q9EQZ6 | Rapgef4 | 16878  | HRAS      | v-Ha-ras Harvey rat sarcoma viral oncogene homolog                               | ENSG00000174775     |
| Q9EQZ6 | Rapgef4 | 191995 | Rap1b     | RAS related protein 1b                                                           | ENSMUSG00000052681  |
| Q9EQZ6 | Rapgef4 | 135873 | Pclo      | piccolo (presynaptic cytomatrix protein)                                         | ENSMUSG00000061601  |
| Q9EQZ6 | Rapgef4 | 136900 | Rims2     | regulating synaptic membrane exocytosis 2                                        | ENSMUSG00000037386  |
| P18911 | Rarg    | 79741  | NCOA3     | nuclear receptor coactivator 3                                                   | ENSG00000124151     |
| Q77PD6 | Raver2  | 171065 | Ptbp1     | polypyrimidine tract binding protein 1                                           | ENSMUSG00000006498  |
| Q77PD6 | Raver2  | 12848  | PTBP1     | polypyrimidine tract binding protein 1                                           | ENSG00000011304     |
| Q8R4X3 | Rbm12   | 209475 | Cd19      | CD19 antigen                                                                     | ENSMUSG00000030724  |
| Q8R4X3 | Rbm12   | 128365 | Lyn       | Yamaquchi sarcoma viral (v-yes-1) oncogene homolog                               | ENSMUSG00000042228  |
| Q8CGC6 | Rbm28   | 156674 | Tcf4      | transcription factor 4                                                           | ENSMUSG00000053477  |
| Q8CGC6 | Rbm28   | 205243 | Ctnnb1    | catenin (cadherin associated protein), beta 1                                    | ENSMUSG00000006932  |
| Q8CGC6 | Rbm28   | 134833 | Tnik      | TRAF2 and NCK interacting kinase                                                 | ENSMUSG00000027692  |
| Q8CGC6 | Rbm28   | 180861 | Zc3h13    | zinc finger CCH type containing 13                                               | ENSMUSG00000022000  |
| Q8CGC6 | Rbm28   | 186169 | Zfp326    | zinc finger protein 326                                                          | ENSMUSG00000029290  |
| Q8CGC6 | Rbm28   | 139346 | Mllt10    | myeloid/lymphoid or mixed-lineage leukemia (trithorax homolog)                   | ENSMUSG00000026743  |
| Q8CGC6 | Rbm28   | 201862 | Smarcc1   | SWI/SNF related, matrix associated, actin dependent regulator of transcription 1 | ENSMUSG00000032481  |
| Q8CGC6 | Rbm28   | 267922 | Smarcd2   | SWI/SNF related, matrix associated, actin dependent regulator of transcription 2 | ENSMUSG00000078619  |
| Q8CGC6 | Rbm28   | 181503 | Flii      | flightless I homolog (Drosophila)                                                | ENSMUSG00000002812  |
| Q8CGC6 | Rbm28   | 143983 | Trim28    | tripartite motif-containing 28                                                   | ENSMUSG00000005566  |
| Q8CGC6 | Rbm28   | 129915 | Rbm14     | RNA binding motif protein 14                                                     | ENSMUSG00000006456  |
| Q8CGC6 | Rbm28   | 196765 | Mybbp1a   | MYB binding protein (P160) 1a                                                    | ENSMUSG000000040463 |
| Q8CGC6 | Rbm28   | 137755 | Wtpap     | Wilms' tumour 1-associating protein                                              | ENSMUSG000000060475 |
| Q8CGC6 | Rbm28   | 135895 | Ubr5      | ubiquitin protein ligase E3 component n-recognin 5                               | ENSMUSG00000037487  |
| Q8CGC6 | Rbm28   | 175749 | Dot1l     | DOT1-like, histone H3 methyltransferase (S. cerevisiae)                          | ENSMUSG00000061589  |
| Q8CGC6 | Rbm28   | 169383 | Rif1      | Rap1 interacting factor 1 homolog (yeast)                                        | ENSMUSG00000036202  |
| Q8CGC6 | Rbm28   | 197552 | Smarcc2   | SWI/SNF related, matrix associated, actin dependent regulator of transcription 2 | ENSMUSG00000025369  |
| Q8CGC6 | Rbm28   | 207801 | Atad3a    | ATPase family, AAA domain containing 3A                                          | ENSMUSG000000029036 |
| Q8CGC6 | Rbm28   | 176882 | Chd1l     | chromodomain helicase DNA binding protein 1-like                                 | ENSMUSG00000028089  |
| Q8CGC6 | Rbm28   | 140748 | Carm1     | coactivator-arginine methyltransferase 1                                         | ENSMUSG00000032185  |
| Q8CGC6 | Rbm28   | 195347 | Arid1a    | AT rich interactive domain 1A (SWI-like)                                         | ENSMUSG00000007880  |
| Q8CGC6 | Rbm28   | 187693 | Wdr47     | WD repeat domain 47                                                              | ENSMUSG000000040389 |
| Q8CGC6 | Rbm28   | 171022 | Smarca5   | SWI/SNF related, matrix associated, actin dependent regulator of transcription 5 | ENSMUSG000000031715 |
| Q8CGC6 | Rbm28   | 177837 | Tcf7l2    | transcription factor 7-like 2, T-cell specific, HMG-box                          | ENSMUSG00000024985  |
| Q8CFE3 | Rcor1   | 171511 | Nr4a2     | nuclear receptor subfamily 4, group A, member 2                                  | ENSMUSG00000026826  |
| Q8CFE3 | Rcor1   | 198084 | Kdm1a     | lysine (K)-specific demethylase 1A                                               | ENSMUSG00000036940  |
| Q8CFE3 | Rcor1   | 175763 | Tal1      | T-cell acute lymphocytic leukemia 1                                              | ENSMUSG00000028717  |
| Q8CFE3 | Rcor1   | 191058 | Hdac1     | histone deacetylase 1                                                            | ENSMUSG00000028800  |
| Q8CFE3 | Rcor1   | 203203 | Nos2      | nitric oxide synthase 2, inducible                                               | ENSMUSG00000020826  |
| Q8CFE3 | Rcor1   | 177358 | Tnf       | tumor necrosis factor                                                            | ENSMUSG00000024401  |
| Q8CFE3 | Rcor1   | 152546 | Gfi1b     | growth factor independent 1B                                                     | ENSMUSG00000026815  |
| Q8CFE3 | Rcor1   | 138489 | Rcor2     | REST corepressor 2                                                               | ENSMUSG00000024968  |
| Q8CFE3 | Rcor1   | 143980 | Hdac2     | histone deacetylase 2                                                            | ENSMUSG000000019777 |
| Q8CFE3 | Rcor1   | 208942 | Rcor3     | REST corepressor 3                                                               | ENSMUSG00000037395  |
| Q6PGA0 | Rcor3   | 152546 | Gfi1b     | growth factor independent 1B                                                     | ENSMUSG00000026815  |
| Q6PGA0 | Rcor3   | 172449 | Rcor1     | REST corepressor 1                                                               | ENSMUSG00000037896  |
| Q6PGA0 | Rcor3   | 138489 | Rcor2     | REST corepressor 2                                                               | ENSMUSG00000024968  |
| Q6PGA0 | Rcor3   | 191058 | Hdac1     | histone deacetylase 1                                                            | ENSMUSG00000028800  |
| Q6PGA0 | Rcor3   | 198084 | Kdm1a     | lysine (K)-specific demethylase 1A                                               | ENSMUSG00000036940  |
| Q6PGA0 | Rcor3   | 143980 | Hdac2     | histone deacetylase 2                                                            | ENSMUSG00000019777  |
| Q75NR7 | Recq4   | 107800 | HNRNPU    | heterogeneous nuclear ribonucleoprotein U (scaffold attachment site 1)           | ENSG00000153187     |
| Q75NR7 | Recq4   | 23949  | GNAI1     | guanine nucleotide binding protein (G protein), alpha inhibitory 1               | ENSG00000127955     |
| Q75NR7 | Recq4   | 100849 | GNAI3     | guanine nucleotide binding protein (G protein), alpha inhibitory 3               | ENSG000000065135    |
| Q75NR7 | Recq4   | 83517  | STOM      | stomatatin                                                                       | ENSG00000148175     |
| Q75NR7 | Recq4   | 85398  | ATAD3A    | ATPase family, AAA domain containing 3A                                          | ENSG00000197785     |
| Q75NR7 | Recq4   | 37588  | HNRNPA1   | heterogeneous nuclear ribonucleoprotein A1                                       | ENSG00000135486     |
| Q75NR7 | Recq4   | 35659  | HNRNPA1L2 | heterogeneous nuclear ribonucleoprotein A1-like 2                                | ENSG00000139675     |
| Q75NR7 | Recq4   | 41960  | CHCHD3    | coiled-coil-helix-coiled-coil-helix domain containing 3                          | ENSG00000106554     |
| Q75NR7 | Recq4   | 36105  | GNAI2     | guanine nucleotide binding protein (G protein), alpha inhibitory 2               | ENSG00000114353     |
| Q75NR7 | Recq4   | 41326  | RECQL4    | RecQ protein-like 4                                                              | ENSG00000160957     |
| Q8BGH4 | Reep1   | 186039 | Olfir992  | olfactory receptor 992                                                           | ENSMUSG00000075221  |
| Q8VEL9 | Rem2    | 30919  | YWHAZ     | tyrosine 3-monooxygenase/tryptophan 5-monooxygenase                              | ENSG00000164924     |
| Q8VEL9 | Rem2    | 135418 | Ywhaz     | tyrosine 3-monooxygenase/tryptophan 5-monooxygenase                              | ENSMUSG00000022285  |
| Q80XA6 | Reps2   | 35667  | ASAP1     | ArfGAP with SH3 domain, ankyrin repeat and PH domain                             | ENSG00000153317     |
| Q80XA6 | Reps2   | 27381  | ASAP2     | ArfGAP with SH3 domain, ankyrin repeat and PH domain                             | ENSG00000151693     |
| Q80XA6 | Reps2   | 60317  | PXN       | paxillin                                                                         | ENSG00000089159     |
| Q80XA6 | Reps2   | 145005 | Asap1     | ArfGAP with SH3 domain, ankyrin repeat and PH domain                             | ENSMUSG00000022377  |
| Q8VIG1 | Rest    | 179756 | Sp3       | trans-acting transcription factor 3                                              | ENSMUSG00000027109  |
| Q8VIG1 | Rest    | 185735 | Nanoq     | Nanoq homeobox                                                                   | ENSMUSG00000012396  |
| Q8VIG1 | Rest    | 144115 | Ewsr1     | Ewing sarcoma breakpoint region 1                                                | ENSMUSG00000009079  |
| Q8VIG1 | Rest    | 159027 | Nr0b1     | nuclear receptor subfamily 0, group B, member 1                                  | ENSMUSG00000025056  |
| Q8VIG1 | Rest    | 156033 | Htt       | huntingtin                                                                       | ENSMUSG00000029104  |
| Q9R1A8 | Rfwd2   | 209676 | Trib3     | tribbles homolog 3 (Drosophila)                                                  | ENSMUSG00000032715  |
| Q9R1A8 | Rfwd2   | 144324 | Trib1     | tribbles homolog 1 (Drosophila)                                                  | ENSMUSG00000032501  |
| Q9R1A8 | Rfwd2   | 129207 | Trib2     | tribbles homolog 2 (Drosophila)                                                  | ENSMUSG00000020601  |
| P48379 | Rfx2    | 214446 | Foxj1     | forkhead box J1                                                                  | ENSMUSG00000034227  |
| P48379 | Rfx2    | 178408 | Pou5f1    | POU domain, class 5, transcription factor 1                                      | ENSMUSG00000024406  |
| P48379 | Rfx2    | 135641 | Mynn      | myoneurin                                                                        | ENSMUSG00000037730  |
| Q61193 | Rgl2    | 180975 | Nras      | neuroblastoma ras oncogene                                                       | ENSMUSG00000027852  |
| Q61193 | Rgl2    | 61868  | CCND1     | cyclin D1                                                                        | ENSG00000110092     |
| Q3UYI5 | Rgl3    | 28871  | SMURF1    | SMAD specific E3 ubiquitin protein ligase 1                                      | ENSG00000198742     |
| Q3UYI5 | Rgl3    | 212024 | Hras1     | Harvey rat sarcoma virus oncogene 1                                              | ENSMUSG00000025499  |
| Q3UYI5 | Rgl3    | 161685 | Rit1      | Ras-like without CAAX 1                                                          | ENSMUSG00000028057  |
| Q35730 | Ring1   | 214665 | Cbx2      | chromobox homolog 2 (Drosophila Pc class)                                        | ENSMUSG00000025577  |
| Q35730 | Ring1   | 172988 | Rybp      | RING1 and YY1 binding protein                                                    | ENSMUSG00000072872  |
| Q35730 | Ring1   | 214668 | Cbx8      | chromobox homolog 8 (Drosophila Pc class)                                        | ENSMUSG00000025578  |
| O35730 | Ring1   | 198910 | Kdm2b     | lysine (K)-specific demethylase 2B                                               | ENSMUSG00000029475  |

|        |           |        |           |                                                            |                     |
|--------|-----------|--------|-----------|------------------------------------------------------------|---------------------|
| O35730 | Rinq1     | 198115 | Rnf2      | ring finger protein 2                                      | ENSMUSG00000026484  |
| O35730 | Rinq1     | 190107 | Phc2      | polyhomeotic-like 2 (Drosophila)                           | ENSMUSG00000028796  |
| O35730 | Rinq1     | 210296 | Pcwf2     | polycomb group ring finger 2                               | ENSMUSG00000018537  |
| O35730 | Rinq1     | 139744 | Bmi1      | Bmi1 polycomb ring finger oncogene                         | ENSMUSG00000026739  |
| O35730 | Rinq1     | 29751  | E2F6      | E2F transcription factor 6                                 | ENSG00000169016     |
| Q60855 | Ripk1     | 156458 | Ikbkq     | inhibitor of kappaB kinase gamma                           | ENSMUSG00000004221  |
| Q60855 | Ripk1     | 189844 | Tnfrsf1a  | tumor necrosis factor receptor superfamily, member 1a      | ENSMUSG00000030341  |
| Q60855 | Ripk1     | 134122 | Optn      | optineurin                                                 | ENSMUSG00000026672  |
| Q60855 | Ripk1     | 156729 | Tlr4      | toll-like receptor 4                                       | ENSMUSG00000039005  |
| Q60855 | Ripk1     | 135792 | Tnfaip3   | tumor necrosis factor, alpha-induced protein 3             | ENSMUSG00000019850  |
| Q60855 | Ripk1     | 210517 | Itch      | itchy, E3 ubiquitin protein ligase                         | ENSMUSG00000027598  |
| Q60855 | Ripk1     | 127807 | Map3k8    | mitogen-activated protein kinase kinase kinase 8           | ENSMUSG00000024235  |
| Q60855 | Ripk1     | 146254 | Traf2     | TNF receptor-associated factor 2                           | ENSMUSG00000026942  |
| Q60855 | Ripk1     | 212910 | Fadd      | Fas (TNFRSF6)-associated via death domain                  | ENSMUSG00000031077  |
| Q60855 | Ripk1     | 165974 | Ripk3     | receptor-interacting serine-threonine kinase 3             | ENSMUSG00000022221  |
| Q60855 | Ripk1     | 167393 | Ppp6c     | protein phosphatase 6, catalytic subunit                   | ENSMUSG00000026753  |
| Q60855 | Ripk1     | 213345 | Map3k3    | mitogen-activated protein kinase kinase kinase 3           | ENSMUSG00000020700  |
| Q60855 | Ripk1     | 69075  | BIRC2     | baculoviral IAP repeat containing 2                        | ENSG00000110330     |
| Q60855 | Ripk1     | 82385  | ZBP1      | Z-DNA binding protein 1                                    | ENSG00000124256     |
| Q60855 | Ripk1     | 213369 | Zbp1      | Z-DNA binding protein 1                                    | ENSMUSG000000036712 |
| Q60855 | Ripk1     | 145432 | Atg12     | autophagy-related 12 (yeast)                               | ENSMUSG00000032905  |
| Q60855 | Ripk1     | 148568 | Atg5      | autophagy-related 5 (yeast)                                | ENSMUSG00000038160  |
| Q60855 | Ripk1     | 62144  | FADD      | Fas (TNFRSF6)-associated via death domain                  | ENSG00000168040     |
| Q60855 | Ripk1     | 24923  | TRIM21    | tripartite motif containing 21                             | ENSG00000132109     |
| Q60855 | Ripk1     | 157464 | Casp8     | caspace 8                                                  | ENSMUSG00000026029  |
| Q60855 | Ripk1     | 186918 | Tradd     | TNFRSF1A-associated via death domain                       | ENSMUSG00000031887  |
| Q60855 | Ripk1     | 178701 | Atg16l1   | autophagy-related 16-like 1 (yeast)                        | ENSMUSG00000026289  |
| Q60855 | Ripk1     | 173742 | Tank      | TRAF family member-associated NF-kappa B activator         | ENSMUSG00000064289  |
| Q60855 | Ripk1     | 177358 | Tnf       | tumor necrosis factor                                      | ENSMUSG00000024401  |
| Q60855 | Ripk1     | 179176 | Cyld      | cylindromatosis (turban tumor syndrome)                    | ENSMUSG000000036712 |
| Q60855 | Ripk1     | 201307 | Ubc       | ubiquitin C                                                | ENSMUSG00000008348  |
| Q60855 | Ripk1     | 191571 | Khdrbs1   | KH domain containing, RNA binding, signal transduction a   | ENSMUSG00000028790  |
| Q60855 | Ripk1     | 168358 | Sqstm1    | sequestosome 1                                             | ENSMUSG00000015837  |
| Q60855 | Ripk1     | 57753  | HTRA2     | HtrA serine peptidase 2                                    | ENSG00000115317     |
| Q60855 | Ripk1     | 133125 | Birc2     | baculoviral IAP repeat-containing 2                        | ENSMUSG000000057367 |
| Q9QZL0 | Ripk3     | 143710 | Ripk1     | receptor (TNFRSF)-interacting serine-threonine kinase 1    | ENSMUSG00000021408  |
| Q9QZL0 | Ripk3     | 212910 | Fadd      | Fas (TNFRSF6)-associated via death domain                  | ENSMUSG00000031077  |
| Q9QZL0 | Ripk3     | 82385  | ZBP1      | Z-DNA binding protein 1                                    | ENSG00000124256     |
| Q9QZL0 | Ripk3     | 191912 | Ticam1    | toll-like receptor adaptor molecule 1                      | ENSMUSG00000047123  |
| Q9QZL0 | Ripk3     | 193153 | Mkl1      | mixed lineage kinase domain-like                           | ENSMUSG000000012519 |
| Q9ERK0 | Ripk4     | 63432  | MAP3K3    | mitogen-activated protein kinase kinase kinase 3           | ENSG00000198909     |
| P70336 | Rock2     | 179428 | Raf1      | v-raf-leukemia viral oncogene 1                            | ENSMUSG00000000441  |
| P70336 | Rock2     | 146219 | Pfn2      | profilin 2                                                 | ENSMUSG00000027805  |
| P70336 | Rock2     | 199633 | Rhoa      | ras homolog gene family, member A                          | ENSMUSG00000007815  |
| Q8BHD7 | Rod1      | 196509 | Irf8      | interferon regulatory factor 8                             | ENSMUSG000000041515 |
| Q8BHD7 | Rod1      | 138828 | Raver1    | ribonucleoprotein, PTB-binding 1                           | ENSMUSG00000010205  |
| Q92139 | Ror1      | 160245 | Maqed1    | melanoma antigen, family D, 1                              | ENSMUSG00000025151  |
| P47963 | Rpl13     | 210657 | Tia1      | Tia1 cytotoxic granule-associated RNA binding protein-like | ENSMUSG00000030846  |
| P47963 | Rpl13     | 187507 | Rpl5      | ribosomal protein L5                                       | ENSMUSG00000058558  |
| P47963 | Rpl13     | 157406 | Rpl8      | ribosomal protein L8                                       | ENSMUSG00000003970  |
| P47963 | Rpl13     | 181665 | Rpl13a    | ribosomal protein L13A                                     | ENSMUSG00000074129  |
| P47963 | Rpl13     | 205215 | Rpl14     | ribosomal protein L14                                      | ENSMUSG00000025794  |
| P47963 | Rpl13     | 184234 | Rpl18     | ribosomal protein L18                                      | ENSMUSG00000059070  |
| P47963 | Rpl13     | 206668 | Rpl22     | ribosomal protein L22                                      | ENSMUSG00000028936  |
| P47963 | Rpl13     | 210357 | Rpl23     | ribosomal protein L23                                      | ENSMUSG00000071415  |
| P47963 | Rpl13     | 147503 | Rpl31     | ribosomal protein L31                                      | ENSMUSG00000073702  |
| P47963 | Rpl13     | 194240 | Rpl34     | ribosomal protein L34                                      | ENSMUSG00000062006  |
| P47963 | Rpl13     | 200714 | Rps3      | ribosomal protein S3                                       | ENSMUSG00000030744  |
| P47963 | Rpl13     | 164942 | Rps4x     | ribosomal protein S4, X-linked                             | ENSMUSG00000031320  |
| P47963 | Rpl13     | 179529 | Rps8      | ribosomal protein S8                                       | ENSMUSG000000047675 |
| P47963 | Rpl13     | 128423 | Rps20     | ribosomal protein S20                                      | ENSMUSG00000028234  |
| P47963 | Rpl13     | 157319 | Rps25     | ribosomal protein S25                                      | ENSMUSG00000009927  |
| P47963 | Rpl13     | 212569 | Ubtf      | upstream binding transcription factor, RNA polymerase I    | ENSMUSG00000020923  |
| P47963 | Rpl13     | 157719 | Ddx21     | DEAD (Asp-Glu-Ala-Asp) box polypeptide 21                  | ENSMUSG00000020075  |
| P47963 | Rpl13     | 213550 | Ddx5      | DEAD (Asp-Glu-Ala-Asp) box polypeptide 5                   | ENSMUSG00000020719  |
| P47963 | Rpl13     | 167580 | Hnrnpm    | heterogeneous nuclear ribonucleoprotein M                  | ENSMUSG00000059208  |
| P47963 | Rpl13     | 133734 | Rpl15     | ribosomal protein L15                                      | ENSMUSG00000012405  |
| P47963 | Rpl13     | 147305 | Gm10240   | predicted gene 10240                                       | ENSMUSG00000068397  |
| P47963 | Rpl13     | 163323 | Rpl30-ps8 | ribosomal protein L30, pseudogene 8                        | ENSMUSG00000062582  |
| P47963 | Rpl13     | 207877 | Srsf1     | serine/arginine-rich splicing factor 1                     | ENSMUSG00000018379  |
| P62889 | Rpl30-ps8 | 210657 | Tia1      | Tia1 cytotoxic granule-associated RNA binding protein-like | ENSMUSG00000030846  |
| P62889 | Rpl30-ps8 | 187507 | Rpl5      | ribosomal protein L5                                       | ENSMUSG00000058558  |
| P62889 | Rpl30-ps8 | 157406 | Rpl8      | ribosomal protein L8                                       | ENSMUSG00000003970  |
| P62889 | Rpl30-ps8 | 198268 | Rpl13     | ribosomal protein L13                                      | ENSMUSG00000000740  |
| P62889 | Rpl30-ps8 | 181665 | Rpl13a    | ribosomal protein L13A                                     | ENSMUSG000000074129 |
| P62889 | Rpl30-ps8 | 205215 | Rpl14     | ribosomal protein L14                                      | ENSMUSG00000025794  |
| P62889 | Rpl30-ps8 | 184234 | Rpl18     | ribosomal protein L18                                      | ENSMUSG00000059070  |
| P62889 | Rpl30-ps8 | 206668 | Rpl22     | ribosomal protein L22                                      | ENSMUSG00000028936  |
| P62889 | Rpl30-ps8 | 210357 | Rpl23     | ribosomal protein L23                                      | ENSMUSG00000071415  |
| P62889 | Rpl30-ps8 | 147503 | Rpl31     | ribosomal protein L31                                      | ENSMUSG00000073702  |
| P62889 | Rpl30-ps8 | 194240 | Rpl34     | ribosomal protein L34                                      | ENSMUSG00000062006  |
| P62889 | Rpl30-ps8 | 200714 | Rps3      | ribosomal protein S3                                       | ENSMUSG00000030744  |
| P62889 | Rpl30-ps8 | 164942 | Rps4x     | ribosomal protein S4, X-linked                             | ENSMUSG00000031320  |
| P62889 | Rpl30-ps8 | 179529 | Rps8      | ribosomal protein S8                                       | ENSMUSG000000047675 |
| P62889 | Rpl30-ps8 | 128423 | Rps20     | ribosomal protein S20                                      | ENSMUSG00000028234  |
| P62889 | Rpl30-ps8 | 157319 | Rps25     | ribosomal protein S25                                      | ENSMUSG00000009927  |
| P62889 | Rpl30-ps8 | 212569 | Ubtf      | upstream binding transcription factor, RNA polymerase I    | ENSMUSG00000020923  |
| P62889 | Rpl30-ps8 | 157719 | Ddx21     | DEAD (Asp-Glu-Ala-Asp) box polypeptide 21                  | ENSMUSG00000020075  |
| P62889 | Rpl30-ps8 | 213550 | Ddx5      | DEAD (Asp-Glu-Ala-Asp) box polypeptide 5                   | ENSMUSG00000020719  |

|        |           |        |           |                                                            |                     |
|--------|-----------|--------|-----------|------------------------------------------------------------|---------------------|
| P62889 | Rpl30-ps8 | 167580 | Hnrnpm    | heterogeneous nuclear ribonucleoprotein M                  | ENSMUSG00000059208  |
| P62889 | Rpl30-ps8 | 133734 | Rpl15     | ribosomal protein L15                                      | ENSMUSG00000012405  |
| P62889 | Rpl30-ps8 | 147305 | Gm10240   | predicted gene 10240                                       | ENSMUSG000000068397 |
| P62889 | Rpl30-ps8 | 207877 | Srsf1     | serine/arginine-rich splicing factor 1                     | ENSMUSG00000018379  |
| Q9D1R9 | Rpl34     | 210657 | Tial1     | Tia1 cytotoxic granule-associated RNA binding protein-like | ENSMUSG00000030846  |
| Q9D1R9 | Rpl34     | 187507 | Rpl5      | ribosomal protein L5                                       | ENSMUSG00000058558  |
| Q9D1R9 | Rpl34     | 157406 | Rpl8      | ribosomal protein L8                                       | ENSMUSG00000003970  |
| Q9D1R9 | Rpl34     | 198268 | Rpl13     | ribosomal protein L13                                      | ENSMUSG00000000740  |
| Q9D1R9 | Rpl34     | 181665 | Rpl13a    | ribosomal protein L13A                                     | ENSMUSG00000074129  |
| Q9D1R9 | Rpl34     | 205215 | Rpl14     | ribosomal protein L14                                      | ENSMUSG000000025794 |
| Q9D1R9 | Rpl34     | 184234 | Rpl18     | ribosomal protein L18                                      | ENSMUSG00000059070  |
| Q9D1R9 | Rpl34     | 206668 | Rpl22     | ribosomal protein L22                                      | ENSMUSG00000028936  |
| Q9D1R9 | Rpl34     | 210357 | Rpl23     | ribosomal protein L23                                      | ENSMUSG00000071415  |
| Q9D1R9 | Rpl34     | 147503 | Rpl31     | ribosomal protein L31                                      | ENSMUSG00000073702  |
| Q9D1R9 | Rpl34     | 200714 | Rps3      | ribosomal protein S3                                       | ENSMUSG000000030744 |
| Q9D1R9 | Rpl34     | 164942 | Rps4x     | ribosomal protein S4, X-linked                             | ENSMUSG00000031320  |
| Q9D1R9 | Rpl34     | 179529 | Rps8      | ribosomal protein S8                                       | ENSMUSG00000047675  |
| Q9D1R9 | Rpl34     | 128423 | Rps20     | ribosomal protein S20                                      | ENSMUSG00000028234  |
| Q9D1R9 | Rpl34     | 157319 | Rps25     | ribosomal protein S25                                      | ENSMUSG00000009927  |
| Q9D1R9 | Rpl34     | 212569 | Ubtf      | upstream binding transcription factor, RNA polymerase I    | ENSMUSG00000020923  |
| Q9D1R9 | Rpl34     | 157719 | Ddx21     | DEAD (Asp-Glu-Ala-Asp) box polypeptide 21                  | ENSMUSG00000020075  |
| Q9D1R9 | Rpl34     | 213550 | Ddx5      | DEAD (Asp-Glu-Ala-Asp) box polypeptide 5                   | ENSMUSG00000020719  |
| Q9D1R9 | Rpl34     | 167580 | Hnrnpm    | heterogeneous nuclear ribonucleoprotein M                  | ENSMUSG00000059208  |
| Q9D1R9 | Rpl34     | 133734 | Rpl15     | ribosomal protein L15                                      | ENSMUSG00000012405  |
| Q9D1R9 | Rpl34     | 147305 | Gm10240   | predicted gene 10240                                       | ENSMUSG000000068397 |
| Q9D1R9 | Rpl34     | 163323 | Rpl30-ps8 | ribosomal protein L30, pseudogene 8                        | ENSMUSG00000062582  |
| Q9D1R9 | Rpl34     | 207877 | Srsf1     | serine/arginine-rich splicing factor 1                     | ENSMUSG00000018379  |
| O88667 | Rrad      | 207763 | Rac1      | RAS-related C3 botulinum substrate 1                       | ENSMUSG00000001847  |
| O88667 | Rrad      | 135418 | Ywhaz     | tyrosine 3-monooxygenase/tryptophan 5-monooxygenase        | ENSMUSG00000022285  |
| O88667 | Rrad      | 141434 | Tpm2      | tropomyosin 2, beta                                        | ENSMUSG00000028464  |
| B2RS91 | Rrn3      | 130935 | Taf1b     | TATA box binding protein (Tbp)-associated factor, RNA pol  | ENSMUSG00000059669  |
| B2RS91 | Rrn3      | 205730 | Polr1b    | polymerase (RNA) I polypeptide B                           | ENSMUSG00000027395  |
| Q9WTM5 | Ruvbl2    | 187207 | Tcfcp2l1  | transcription factor CP2-like 1                            | ENSMUSG00000026380  |
| Q9WTM5 | Ruvbl2    | 166976 | Ruvbl1    | RuvB-like protein 1                                        | ENSMUSG00000030079  |
| Q9WTM5 | Ruvbl2    | 185177 | Leo1      | Leo1, Paf1/RNA polymerase II complex component, homo       | ENSMUSG00000042487  |
| Q9WTM5 | Ruvbl2    | 160219 | Wdr1      | WD repeat domain 1                                         | ENSMUSG00000005103  |
| Q9WTM5 | Ruvbl2    | 206751 | Ctr9      | Ctr9, Paf1/RNA polymerase II complex component, homo       | ENSMUSG00000005609  |
| Q9WTM5 | Ruvbl2    | 213166 | Sall4     | sal-like 4 (Drosophila)                                    | ENSMUSG00000027547  |
| P28700 | Rxra      | 151419 | Relb      | avian reticuloendotheliosis viral (v-rel) oncogene related | ENSMUSG00000002983  |
| P28700 | Rxra      | 36616  | SP1       | Sp1 transcription factor                                   | ENSG00000185591     |
| P28700 | Rxra      | 136387 | Trim24    | tripartite motif-containing 24                             | ENSMUSG00000029833  |
| P28700 | Rxra      | 75619  | NONO      | non-POU domain containing, octamer-binding                 | ENSG00000147140     |
| P28700 | Rxra      | 23397  | SIN3A     | SIN3 homolog A, transcription regulator (yeast)            | ENSG00000169375     |
| P28700 | Rxra      | 210748 | Thra      | thyroid hormone receptor alpha                             | ENSMUSG00000058756  |
| P28700 | Rxra      | 133569 | Thrb      | thyroid hormone receptor beta                              | ENSMUSG000000021779 |
| P28700 | Rxra      | 63568  | MED25     | mediator complex subunit 25                                | ENSG00000104973     |
| P28700 | Rxra      | 180153 | Med25     | mediator of RNA polymerase II transcription, subunit 25 H  | ENSMUSG00000002968  |
| P28700 | Rxra      | 47411  | RARA      | retinoic acid receptor, alpha                              | ENSG00000131759     |
| P28700 | Rxra      | 96092  | SFPQ      | splicing factor proline/glutamine-rich                     | ENSG00000116560     |
| P28700 | Rxra      | 151888 | Hes1      | hairly and enhancer of split 1 (Drosophila)                | ENSMUSG00000022528  |
| P28700 | Rxra      | 191058 | Hdac1     | histone deacetylase 1                                      | ENSMUSG00000028800  |
| P28700 | Rxra      | 205564 | Cyp3a13   | cytochrome P450, family 3, subfamily a, polypeptide 13     | ENSMUSG00000029727  |
| P28700 | Rxra      | 205549 | Ccl6      | chemokine (C-C motif) ligand 6                             | ENSMUSG00000018927  |
| P28700 | Rxra      | 205529 | Ccl9      | chemokine (C-C motif) ligand 9                             | ENSMUSG00000019122  |
| P28700 | Rxra      | 190792 | Nr1h3     | nuclear receptor subfamily 1, group H, member 3            | ENSMUSG00000002108  |
| P28700 | Rxra      | 133480 | Rarb      | retinoic acid receptor, beta                               | ENSMUSG00000017491  |
| P28700 | Rxra      | 178353 | Zfp423    | zinc finger protein 423                                    | ENSMUSG00000045333  |
| P28700 | Rxra      | 210842 | Rara      | retinoic acid receptor, alpha                              | ENSMUSG00000037992  |
| P28700 | Rxra      | 175763 | Tal1      | T-cell acute lymphocytic leukemia 1                        | ENSMUSG000000028717 |
| P28700 | Rxra      | 95333  | MECR      | mitochondrial trans-2-enoyl-CoA reductase                  | ENSG00000116353     |
| P28700 | Rxra      | 132359 | Pcmt1     | protein-L-isospartate (D-aspartate) O-methyltransferase    | ENSMUSG00000019795  |
| P28700 | Rxra      | 170640 | Ppara     | peroxisome proliferator activated receptor alpha           | ENSMUSG00000022383  |
| P28700 | Rxra      | 184281 | Nr1h4     | nuclear receptor subfamily 1, group H, member 4            | ENSMUSG000000047638 |
| P28700 | Rxra      | 155072 | Nsd1      | nuclear receptor-binding SET-domain protein 1              | ENSMUSG00000021488  |
| P28700 | Rxra      | 158082 | Ppard     | peroxisome proliferator activator receptor delta           | ENSMUSG00000002250  |
| P28700 | Rxra      | 49450  | SMARCD3   | SWI/SNF related, matrix associated, actin dependent regu   | ENSG00000082014     |
| P28704 | Rxb       | 100140 | GTF2B     | general transcription factor IIB                           | ENSG00000137947     |
| P28704 | Rxb       | 788    | NRIP1     | nuclear receptor interacting protein 1                     | ENSG00000180530     |
| Q9QX96 | Sall2     | 209608 | Ngfr      | nerve growth factor receptor (TNFR superfamily, member     | ENSMUSG000000001020 |
| Q9QX96 | Sall2     | 213166 | Sall4     | sal-like 4 (Drosophila)                                    | ENSMUSG00000027547  |
| Q8BIH0 | Sap130    | 176265 | Csn1s1    | casein alpha s1                                            | ENSMUSG00000070702  |
| P26638 | Sars      | 170858 | Ppp2ca    | protein phosphatase 2 (formerly 2A), catalytic subunit, al | ENSMUSG00000020349  |
| Q8K2B3 | Sdha      | 204104 | Sdhc      | succinate dehydrogenase complex, subunit C, integral me    | ENSMUSG000000058076 |
| Q8K2B3 | Sdha      | 201440 | Sdhb      | succinate dehydrogenase complex, subunit B, iron sulfur    | ENSMUSG00000009863  |
| Q8BH34 | Sema3d    | 201088 | Nrp1      | neuropilin 1                                               | ENSMUSG000000025810 |
| Q91ZX6 | Senp2     | 191852 | Mdm2      | transformed mouse 3T3 cell double minute 2                 | ENSMUSG00000020184  |
| Q91ZX6 | Senp2     | 99221  | JUN       | jun proto-oncogene                                         | ENSG00000177606     |
| Q91ZX6 | Senp2     | 9064   | RANGAP1   | Ran GTPase activating protein 1                            | ENSG00000100401     |
| Q91ZX6 | Senp2     | 21462  | PML       | promyelocytic leukemia                                     | ENSG00000140464     |
| Q9CY58 | Serbp1    | 180907 | Prmt1     | protein arginine N-methyltransferase 1                     | ENSMUSG000000052429 |
| Q9CY58 | Serbp1    | 161405 | Prmt5     | protein arginine N-methyltransferase 5                     | ENSMUSG00000023110  |
| Q9CY58 | Serbp1    | 160992 | Lmna      | lamin A                                                    | ENSMUSG00000028063  |
| Q9D7D2 | Serpina9  | 196509 | Irf8      | interferon regulatory factor 8                             | ENSMUSG000000041515 |
| Q8VIJ6 | Sfpq      | 98367  | ELAVL4    | ELAV (embryonic lethal, abnormal vision, Drosophila)-like  | ENSG00000162374     |
| Q8VIJ6 | Sfpq      | 175322 | G3bp1     | Ras-GTPase-activating protein SH3-domain binding protei    | ENSMUSG000000018583 |
| Q8VIJ6 | Sfpq      | 209747 | Igf2bp1   | insulin-like growth factor 2 mRNA binding protein 1        | ENSMUSG000000013415 |
| Q8VIJ6 | Sfpq      | 171611 | Hnrnp2    | heterogeneous nuclear ribonucleoprotein H2                 | ENSMUSG000000045427 |
| Q8VIJ6 | Sfpq      | 206751 | Ctr9      | Ctr9, Paf1/RNA polymerase II complex component, homo       | ENSMUSG00000005609  |
| Q8VIJ6 | Sfpq      | 141000 | Smarca4   | SWI/SNF related, matrix associated, actin dependent regu   | ENSMUSG00000032187  |



|        |          |        |          |                                                                           |                     |
|--------|----------|--------|----------|---------------------------------------------------------------------------|---------------------|
| Q8VIJ6 | Sfpq     | 200597 | Ywhae    | tyrosine 3-monooxygenase/tryptophan 5-monooxygenase                       | ENSMUSG00000020849  |
| Q8VIJ6 | Sfpq     | 155600 | Smarca2  | SWI/SNF related, matrix associated, actin dependent regul                 | ENSMUSG00000024921  |
| P21841 | Sftpc    | 183743 | Nedd4    | neurial precursor cell expressed, developmentally down-re                 | ENSMUSG00000032216  |
| P21841 | Sftpc    | 64029  | Ubc      | ubiquitin C                                                               | ENSG00000150991     |
| P50404 | Sftpd    | 38028  | NFATC3   | nuclear factor of activated T-cells, cytoplasmic, calcineurin             | ENSG00000072736     |
| Q9JUJ8 | Sh3baryl | 196509 | Irf8     | interferon regulatory factor 8                                            | ENSMUSG00000041515  |
| Q91X43 | Sh3d19   | 132723 | Sh3yl1   | Sh3 domain YSC-like 1                                                     | ENSMUSG00000020669  |
| Q69Z11 | Sh3rf1   | 161456 | Akt2     | thymoma viral proto-oncogene 2                                            | ENSMUSG00000004056  |
| Q69Z11 | Sh3rf1   | 30112  | SIAH1    | seven in absentia homolog 1 (Drosophila)                                  | ENSG00000196470     |
| Q69Z11 | Sh3rf1   | 175760 | Bnip3l   | BCL2/adenovirus E1B interacting protein 3-like                            | ENSMUSG00000022051  |
| Q69Z11 | Sh3rf1   | 184437 | Siah1b   | seven in absentia 1B                                                      | ENSMUSG00000040749  |
| Q69Z11 | Sh3rf1   | 146539 | Siah2    | seven in absentia 2                                                       | ENSMUSG00000036432  |
| Q69Z11 | Sh3rf1   | 178087 | Siah1a   | seven in absentia 1A                                                      | ENSMUSG00000036840  |
| Q69Z11 | Sh3rf1   | 32209  | RACGAP1  | Rac GTPase activating protein 1                                           | ENSG00000161800     |
| Q69Z11 | Sh3rf1   | 132706 | Map3k11  | mitogen-activated protein kinase kinase 11                                | ENSMUSG00000004054  |
| Q8BMC3 | Shc2     | 63979  | ABI1     | abl-interactor 1                                                          | ENSG00000136754     |
| Q77PQ3 | Shprh    | 14944  | RAD18    | RAD18 homolog (S. cerevisiae)                                             | ENSG00000070950     |
| Q77PQ3 | Shprh    | 64029  | Ubc      | ubiquitin C                                                               | ENSG00000150991     |
| Q77PQ3 | Shprh    | 88504  | POLH     | polymerase (DNA directed), eta                                            | ENSG00000170734     |
| Q77PQ3 | Shprh    | 60482  | HLTF     | helicase-like transcription factor                                        | ENSG00000071794     |
| Q77PQ3 | Shprh    | 29209  | POLK     | polymerase (DNA directed) kappa                                           | ENSG00000122008     |
| Q61045 | Sim1     | 172055 | Hsp90aa1 | heat shock protein 90, alpha (cytosolic), class A member                  | ENSMUSG00000021270  |
| Q61045 | Sim1     | 172688 | Arnt     | aryl hydrocarbon receptor nuclear translocator                            | ENSMUSG00000015522  |
| Q61045 | Sim1     | 102199 | ARNT     | aryl hydrocarbon receptor nuclear translocator                            | ENSG00000143437     |
| Q61045 | Sim1     | 25737  | ARNT2    | aryl-hydrocarbon receptor nuclear translocator 2                          | ENSG00000172379     |
| P97797 | Sirpa    | 187635 | Ptpn6    | protein tyrosine phosphatase, non-receptor type 6                         | ENSMUSG00000004266  |
| P97797 | Sirpa    | 165137 | Cd47     | CD47 antigen (Rh-related antigen, integrin-associated sig                 | ENSMUSG00000055447  |
| P97797 | Sirpa    | 164495 | Shc1     | src homology 2 domain-containing transforming protein C                   | ENSMUSG00000042626  |
| P97797 | Sirpa    | 196834 | Ptpn11   | protein tyrosine phosphatase, non-receptor type 11                        | ENSMUSG00000043733  |
| P97797 | Sirpa    | 178868 | Pik3r1   | phosphatidylinositol 3-kinase, regulatory subunit, polypep                | ENSMUSG00000041417  |
| P97797 | Sirpa    | 175126 | Ptk2b    | PTK2 protein tyrosine kinase 2 beta                                       | ENSMUSG00000059456  |
| P97797 | Sirpa    | 209950 | Skap1    | src family associated phosphoprotein 1                                    | ENSMUSG00000057058  |
| P97797 | Sirpa    | 128115 | Fyb      | FYN binding protein                                                       | ENSMUSG00000022148  |
| P97797 | Sirpa    | 177258 | Siglece  | sialic acid binding Ig-like lectin E                                      | ENSMUSG00000030474  |
| P97797 | Sirpa    | 159342 | Dok1     | docking protein 1                                                         | ENSMUSG000000068335 |
| P97797 | Sirpa    | 199566 | Gab2     | growth factor receptor bound protein 2-associated protein                 | ENSMUSG00000004508  |
| P97797 | Sirpa    | 162900 | Btla     | B and T lymphocyte associated                                             | ENSMUSG00000052013  |
| Q60698 | Ski      | 131686 | Gli3     | GLI-Kruppel family member GLI3                                            | ENSMUSG00000021318  |
| Q60665 | Skil     | 132962 | Map3k7   | mitogen-activated protein kinase kinase kinase 7                          | ENSMUSG00000028284  |
| Q60665 | Skil     | 201307 | Ubc      | ubiquitin C                                                               | ENSMUSG00000008348  |
| Q60665 | Skil     | 235293 | CPNE1    | copine I                                                                  | ENSG00000214078     |
| Q60665 | Skil     | 56698  | CPNE4    | copine IV                                                                 | ENSG00000196353     |
| Q60665 | Skil     | 213588 | Smurf2   | SMAD specific E3 ubiquitin protein ligase 2                               | ENSMUSG00000018363  |
| Q60665 | Skil     | 32962  | CPNE2    | copine II                                                                 | ENSG00000140848     |
| Q60665 | Skil     | 171712 | Pml      | promyelocytic leukemia                                                    | ENSMUSG000000036986 |
| Q60665 | Skil     | 191036 | Trp53    | transformation related protein 53                                         | ENSMUSG00000059552  |
| Q924N4 | Slc12a6  | 175590 | Stk39    | serine/threonine kinase 39, STE20/SPS1 homolog (yeast)                    | ENSMUSG00000027030  |
| Q924N4 | Slc12a6  | 204530 | Oxsr1    | oxidative-stress responsive 1                                             | ENSMUSG00000036737  |
| Q924N4 | Slc12a6  | 196509 | Irf8     | interferon regulatory factor 8                                            | ENSMUSG00000041515  |
| Q9JIP7 | Slc15a1  | 201437 | Epcam    | epithelial cell adhesion molecule                                         | ENSMUSG000000045394 |
| Q9JIP7 | Slc15a1  | 179812 | Atp1a1   | ATPase, Na <sup>+</sup> /K <sup>+</sup> transporting, alpha 1 polypeptide | ENSMUSG00000033161  |
| Q9JIP7 | Slc15a1  | 188705 | Actr3    | ARP3 actin-related protein 3 homolog (yeast)                              | ENSMUSG000000026341 |
| Q9JIP7 | Slc15a1  | 202513 | Atp1b1   | ATPase, Na <sup>+</sup> /K <sup>+</sup> transporting, beta 1 polypeptide  | ENSMUSG00000026576  |
| P51906 | Slc1a1   | 185903 | Hccs     | holocytochrome c synthetase                                               | ENSMUSG00000031352  |
| P56564 | Slc1a3   | 30077  | SNCA     | synuclein, alpha (non A4 component of amyloid precursor                   | ENSG00000145335     |
| P48962 | Slc25a4  | 96919  | BCLAF1   | BCL2-associated transcription factor 1                                    | ENSG00000029363     |
| P48962 | Slc25a4  | 33127  | ARL2BP   | ADP-ribosylation factor-like 2 binding protein                            | ENSG00000102931     |
| P51881 | Slc25a5  | 200597 | Ywhae    | tyrosine 3-monooxygenase/tryptophan 5-monooxygenase                       | ENSMUSG00000020849  |
| Q8BTY2 | Slc4a7   | 129229 | Cftr     | cystic fibrosis transmembrane conductance regulator hom                   | ENSMUSG00000041301  |
| P63115 | Slc7a10  | 175763 | Tal1     | T-cell acute lymphocytic leukemia 1                                       | ENSMUSG00000028717  |
| P63115 | Slc7a10  | 140475 | Slc3a2   | solute carrier family 3 (activators of dibasic and neutral a              | ENSMUSG00000010095  |
| Q80TR4 | Slit1    | 188640 | Ntn1     | netrin 1                                                                  | ENSMUSG00000020902  |
| Q6P9Z1 | Smarca3  | 201862 | Smarca1  | SWI/SNF related, matrix associated, actin dependent regul                 | ENSMUSG00000032481  |
| Q6P9Z1 | Smarca3  | 203632 | Baz1b    | bromodomain adjacent to zinc finger domain, 1B                            | ENSMUSG00000002748  |
| Q6P9Z1 | Smarca3  | 141000 | Smarca4  | SWI/SNF related, matrix associated, actin dependent regul                 | ENSMUSG000000032187 |
| Q6P9Z1 | Smarca3  | 155600 | Smarca2  | SWI/SNF related, matrix associated, actin dependent regul                 | ENSMUSG00000024921  |
| Q6P9Z1 | Smarca3  | 144501 | Pbrm1    | polybromo 1                                                               | ENSMUSG00000042323  |
| Q6P9Z1 | Smarca3  | 197552 | Smarca2  | SWI/SNF related, matrix associated, actin dependent regul                 | ENSMUSG00000025369  |
| Q6P9Z1 | Smarca3  | 164658 | Rbpj     | recombination signal binding protein for immunoglobulin                   | ENSMUSG00000039191  |
| Q6P9Z1 | Smarca3  | 157503 | Smad4    | MAD homolog 4 (Drosophila)                                                | ENSMUSG000000024515 |
| Q6P9Z1 | Smarca3  | 172452 | Gata4    | GATA binding protein 4                                                    | ENSMUSG00000021944  |
| Q6P9Z1 | Smarca3  | 149571 | Notch1   | Notch gene homolog 1 (Drosophila)                                         | ENSMUSG00000026923  |
| Q6P9Z1 | Smarca3  | 170516 | Smad1    | MAD homolog 1 (Drosophila)                                                | ENSMUSG000000031681 |
| Q9CU62 | Smc1a    | 166501 | Atrx     | alpha thalassemia/mental retardation syndrome X-linked                    | ENSMUSG000000031229 |
| Q9CU62 | Smc1a    | 176737 | Smc3     | structural maintenance of chromosomes 3                                   | ENSMUSG000000024974 |
| Q9CU62 | Smc1a    | 178408 | Pou5f1   | POU domain, class 5, transcription factor 1                               | ENSMUSG000000024406 |
| Q9CU62 | Smc1a    | 154983 | Mecp2    | methyl CpG binding protein 2                                              | ENSMUSG000000031393 |
| Q9CU62 | Smc1a    | 183499 | Sycp3    | synaptonemal complex protein 3                                            | ENSMUSG00000020059  |
| Q8R570 | Snap47   | 137550 | Nova1    | neuro-oncological ventral antigen 1                                       | ENSMUSG00000021047  |
| P62315 | Snrpd1   | 14171  | GEMIN4   | gem (nuclear organelle) associated protein 4                              | ENSG00000179409     |
| P62315 | Snrpd1   | 26826  | SMN1     | survival of motor neuron 1, telomeric                                     | ENSG00000172062     |
| Q61234 | Snta1    | 158412 | Dmd      | dystrophin, muscular dystrophy                                            | ENSMUSG00000045103  |
| Q61234 | Snta1    | 26059  | SCN5A    | sodium channel, voltage-gated, type V, alpha subunit                      | ENSG00000183873     |
| Q61234 | Snta1    | 214339 | Grb2     | growth factor receptor bound protein 2                                    | ENSMUSG00000059923  |
| Q61234 | Snta1    | 193105 | Atp2b4   | ATPase, Ca <sup>++</sup> transporting, plasma membrane 4                  | ENSMUSG00000026463  |
| Q61234 | Snta1    | 204746 | Scn5a    | sodium channel, voltage-gated, type V, alpha                              | ENSMUSG00000032511  |
| Q61234 | Snta1    | 194926 | Nos1     | nitric oxide synthase 1, neuronal                                         | ENSMUSG00000029361  |
| Q61234 | Snta1    | 141842 | Sntb1    | syntrophin, basic 1                                                       | ENSMUSG00000060429  |
| Q61234 | Snta1    | 131149 | Dtna     | dystrobrevin alpha                                                        | ENSMUSG00000024302  |

|        |         |        |          |                                                                      |                     |
|--------|---------|--------|----------|----------------------------------------------------------------------|---------------------|
| Q61235 | Sntb2   | 177819 | Mast2    | microtubule associated serine/threonine kinase 2                     | ENSMUSG00000003810  |
| Q61235 | Sntb2   | 175299 | Mast1    | microtubule associated serine/threonine kinase 1                     | ENSMUSG000000053693 |
| Q61235 | Sntb2   | 141842 | Sntb1    | synthrophin, basic 1                                                 | ENSMUSG000000060429 |
| Q61235 | Sntb2   | 133665 | Utrn     | utrophin                                                             | ENSMUSG000000019820 |
| Q61235 | Sntb2   | 158412 | Dmd      | dystrophin, muscular dystrophy                                       | ENSMUSG000000045103 |
| Q9CSN1 | Snw1    | 168138 | Daxx     | Fas death domain-associated protein                                  | ENSMUSG00000002307  |
| Q9CSN1 | Snw1    | 96746  | PPIE     | peptidylprolyl isomerase E (cyclophilin E)                           | ENSG000000084072    |
| Q9CSN1 | Snw1    | 85090  | PP1L1    | peptidylprolyl isomerase (cyclophilin)-like 1                        | ENSG000000137168    |
| Q9CSN1 | Snw1    | 23046  | XAB2     | XPA binding protein 2                                                | ENSG000000076924    |
| Q9CSN1 | Snw1    | 61602  | SNRNP200 | small nuclear ribonucleoprotein 200kDa (U5)                          | ENSG000000144028    |
| Q9CSN1 | Snw1    | 63055  | RSRC1    | arginine/serine-rich coiled-coil 1                                   | ENSG000000174891    |
| Q9CSN1 | Snw1    | 39136  | HOMER3   | homer homolog 3 (Drosophila)                                         | ENSG000000051128    |
| Q9CSN1 | Snw1    | 54412  | EFTUD2   | elongation factor Tu GTP binding domain containing 2                 | ENSG000000108883    |
| Q9CSN1 | Snw1    | 58090  | CRNKL1   | crooked neck pre-mRNA splicing factor-like 1 (Drosophila)            | ENSG000000101343    |
| Q9CSN1 | Snw1    | 159027 | Nr0b1    | nuclear receptor subfamily 0, group B, member 1                      | ENSMUSG000000025056 |
| Q9CSN1 | Snw1    | 31002  | HOMER1   | homer homolog 1 (Drosophila)                                         | ENSG000000152413    |
| Q9CSN1 | Snw1    | 105992 | SNRPE    | small nuclear ribonucleoprotein polypeptide E                        | ENSG000000182004    |
| Q9CSN1 | Snw1    | 94274  | SYF2     | SYF2 homolog, RNA splicing factor (S. cerevisiae)                    | ENSG000000117614    |
| Q9CSN1 | Snw1    | 95411  | SNRNP40  | small nuclear ribonucleoprotein 40kDa (U5)                           | ENSG000000060688    |
| Q9CSN1 | Snw1    | 1817   | GCFC1    | GC-rich sequence DNA-binding factor 1                                | ENSG000000159086    |
| Q9CSN1 | Snw1    | 11833  | DHX15    | DEAH (Asp-Glu-Ala-His) box polypeptide 15                            | ENSG000000109606    |
| Q9CSN1 | Snw1    | 2890   | SNRPD3   | small nuclear ribonucleoprotein D3 polypeptide 18kDa                 | ENSG000000100028    |
| Q9CSN1 | Snw1    | 89604  | CDC5L    | CDC5 cell division cycle 5-like (S. pombe)                           | ENSG000000096401    |
| Q9CSN1 | Snw1    | 15306  | PRPF8    | PRP8 pre-mRNA processing factor 8 homolog (S. cerevisiae)            | ENSG000000174231    |
| Q9CSN1 | Snw1    | 34490  | SAAL1    | serum amyloid A-like 1                                               | ENSG000000166788    |
| Q9CSN1 | Snw1    | 95222  | CDC40    | cell division cycle 40 homolog (S. cerevisiae)                       | ENSG000000168438    |
| Q9CSN1 | Snw1    | 42004  | PLRG1    | pleiotropic regulator 1                                              | ENSG000000171566    |
| Q9CSN1 | Snw1    | 31038  | CCDC12   | coiled-coil domain containing 12                                     | ENSG000000160799    |
| Q9CSN1 | Snw1    | 14100  | SNW1     | SNW domain containing 1                                              | ENSG000000100603    |
| Q9CSN1 | Snw1    | 5692   | AQR      | aquarius homolog (mouse)                                             | ENSG000000021776    |
| Q9CSN1 | Snw1    | 72393  | C20orf4  | chromosome 20 open reading frame 4                                   | ENSG000000131043    |
| Q9CSN1 | Snw1    | 57903  | SNRPD2   | small nuclear ribonucleoprotein D2 polypeptide 16.5kDa               | ENSG000000125743    |
| Q9CSN1 | Snw1    | 49436  | PRPF19   | PRP19/PSO4 pre-mRNA processing factor 19 homolog (S. cerevisiae)     | ENSG000000110107    |
| Q9CSN1 | Snw1    | 1426   | SNRPD1   | small nuclear ribonucleoprotein D1 polypeptide 16kDa                 | ENSG000000167088    |
| Q9CSN1 | Snw1    | 68415  | CWC15    | CWC15 spliceosome-associated protein homolog (S. cerevisiae)         | ENSG000000150316    |
| Q9CSN1 | Snw1    | 159441 | Sirt1    | sirtuin 1 (silent mating type information regulation 2, homolog 1)   | ENSMUSG000000020063 |
| Q9CSN1 | Snw1    | 210842 | Rara     | retinoic acid receptor, alpha                                        | ENSMUSG000000037992 |
| O35717 | Socs2   | 29281  | EPOR     | erythropoietin receptor                                              | ENSG000000187266    |
| O35717 | Socs2   | 167734 | Lepr     | leptin receptor                                                      | ENSMUSG000000057722 |
| O35717 | Socs2   | 132667 | Socs1    | suppressor of cytokine signaling 1                                   | ENSMUSG000000038037 |
| O35717 | Socs2   | 197065 | Cish     | cytokine inducible SH2-containing protein                            | ENSMUSG000000032578 |
| O35717 | Socs2   | 10956  | TCEB2    | transcription elongation factor B (SIII), polypeptide 2 (18kDa)      | ENSG000000103363    |
| O35717 | Socs2   | 166023 | Cul5     | cullin 5                                                             | ENSMUSG000000032030 |
| O35717 | Socs2   | 25766  | TCEB1    | transcription elongation factor B (SIII), polypeptide 1 (15kDa)      | ENSG000000154582    |
| Q3UTJ2 | Sorbs2  | 200597 | Ywhae    | tyrosine 3-monooxygenase/tryptophan 5-monooxygenase                  | ENSMUSG000000020849 |
| P48432 | Sox2    | 143980 | Hdac2    | histone deacetylase 2                                                | ENSMUSG000000019777 |
| P48432 | Sox2    | 191058 | Hdac1    | histone deacetylase 1                                                | ENSMUSG000000028800 |
| P48432 | Sox2    | 169269 | Sin3a    | transcriptional regulator, SIN3A (yeast)                             | ENSMUSG000000042557 |
| P48432 | Sox2    | 168721 | Xpo4     | exportin 4                                                           | ENSMUSG000000021952 |
| P48432 | Sox2    | 192631 | Alx4     | aristaless-like homeobox 4                                           | ENSMUSG000000040310 |
| P48432 | Sox2    | 205243 | Ctnnb1   | catenin (cadherin associated protein), beta 1                        | ENSMUSG00000006932  |
| P48432 | Sox2    | 179250 | Erq      | avian erythroblastosis virus E-26 (v-ets) oncogene related protein 1 | ENSMUSG000000040732 |
| P48432 | Sox2    | 178408 | Pou5f1   | POU domain, class 5, transcription factor 1                          | ENSMUSG000000024406 |
| P48432 | Sox2    | 151396 | Ube2i    | ubiquitin-conjugating enzyme E2I                                     | ENSMUSG000000015120 |
| P48432 | Sox2    | 185735 | Nanog    | Nanog homeobox                                                       | ENSMUSG000000012396 |
| P48432 | Sox2    | 146412 | Sae1     | SUMO1 activating enzyme subunit 1                                    | ENSMUSG000000052833 |
| P48432 | Sox2    | 201307 | Ubc      | ubiquitin C                                                          | ENSMUSG000000008348 |
| P48432 | Sox2    | 194974 | Pax6     | paired box gene 6                                                    | ENSMUSG000000027168 |
| P48432 | Sox2    | 173092 | Uba2     | ubiquitin-like modifier activating enzyme 2                          | ENSMUSG000000052997 |
| P48432 | Sox2    | 151490 | Max      | Max protein                                                          | ENSMUSG000000059436 |
| P48432 | Sox2    | 175693 | Smad3    | MAD homolog 3 (Drosophila)                                           | ENSMUSG000000032402 |
| P48432 | Sox2    | 207372 | Lefty1   | left right determination factor 1                                    | ENSMUSG000000038793 |
| P48432 | Sox2    | 170258 | Xpc      | xeroderma pigmentosum, complementation group C                       | ENSMUSG000000030094 |
| P48432 | Sox2    | 151407 | Cetn2    | centrin 2                                                            | ENSMUSG000000031347 |
| P48432 | Sox2    | 148611 | Rad23b   | RAD23b homolog (S. cerevisiae)                                       | ENSMUSG000000028426 |
| Q9JM73 | Srf     | 166203 | Sreb2    | sterol regulatory element binding factor 2                           | ENSMUSG000000022463 |
| Q9JM73 | Srf     | 149514 | Six5     | sine oculis-related homeobox 5 homolog (Drosophila)                  | ENSMUSG000000040841 |
| Q9JM73 | Srf     | 182872 | Elf1     | E74-like factor 1                                                    | ENSMUSG000000036461 |
| Q9JM73 | Srf     | 136414 | Egr1     | early growth response 1                                              | ENSMUSG000000038418 |
| Q9JM73 | Srf     | 47191  | EGR1     | early growth response 1                                              | ENSG000000120738    |
| Q9JM73 | Srf     | 68724  | NCOA6    | nuclear receptor coactivator 6                                       | ENSG000000198646    |
| Q9JM73 | Srf     | 127970 | Epc1     | enhancer of polycomb homolog 1 (Drosophila)                          | ENSMUSG000000024240 |
| O54781 | Srp2    | 60601  | SRSF1    | serine/arginine-rich splicing factor 1                               | ENSG000000136450    |
| O08943 | Ssrp1   | 178408 | Pou5f1   | POU domain, class 5, transcription factor 1                          | ENSMUSG000000024406 |
| P30873 | Sstr1   | 193317 | Dlg4     | discs, large homolog 4 (Drosophila)                                  | ENSMUSG000000020886 |
| P30873 | Sstr1   | 198905 | Dlg2     | discs, large homolog 2 (Drosophila)                                  | ENSMUSG000000052572 |
| Q64687 | St8sia1 | 175763 | Tal1     | T-cell acute lymphocytic leukemia 1                                  | ENSMUSG000000028717 |
| Q9WWL2 | Stat2   | 189118 | Ndel1    | nuclear distribution gene E-like homolog 1 (A. nidulans)             | ENSMUSG000000018736 |
| Q9WWL2 | Stat2   | 183285 | Cops4    | COP9 (constitutive photomorphogenic) homolog, subunit 4              | ENSMUSG000000035297 |
| Q9WWL2 | Stat2   | 164579 | Irf9     | interferon regulatory factor 9                                       | ENSMUSG000000002325 |
| Q9WWL2 | Stat2   | 192256 | Cand1    | cullin associated and neddylation disassociated 1                    | ENSMUSG000000020114 |
| Q9WWL2 | Stat2   | 214627 | Cytl1    | cytohesin 1                                                          | ENSMUSG000000017132 |
| Q9WWL2 | Stat2   | 180303 | Appl2    | adaptor protein, phosphotyrosine interaction, PH domain containing 2 | ENSMUSG000000020263 |
| Q9WWL2 | Stat2   | 194486 | Stx12    | syntaxin 12                                                          | ENSMUSG000000028879 |
| Q9WWL2 | Stat2   | 193577 | Bcar1    | breast cancer anti-estrogen resistance 1                             | ENSMUSG000000031955 |
| Q9WWL2 | Stat2   | 144730 | Ssna1    | Sioqren's syndrome nuclear autoantigen 1                             | ENSMUSG000000026966 |
| Q9WWL2 | Stat2   | 171841 | Septin8  | septin 8                                                             | ENSMUSG000000018398 |
| Q9WWL2 | Stat2   | 168462 | Rcn2     | reticulocalbin 2                                                     | ENSMUSG000000032320 |
| Q9WWL2 | Stat2   | 606500 | Purb     | purine rich element binding protein B                                | ENSMUSG000000091207 |

|        |       |        |           |                                                            |                     |
|--------|-------|--------|-----------|------------------------------------------------------------|---------------------|
| Q9WVL2 | Stat2 | 203055 | Pdcd6ip   | programmed cell death 6 interacting protein                | ENSMUSG00000032504  |
| Q9WVL2 | Stat2 | 163345 | Zfp36     | zinc finger protein 36                                     | ENSMUSG00000044786  |
| Q9WVL2 | Stat2 | 44867  | EIF2AK2   | eukaryotic translation initiation factor 2-alpha kinase 2  | ENSG00000055332     |
| Q9WVL2 | Stat2 | 164782 | Ep300     | E1A binding protein p300                                   | ENSMUSG00000055024  |
| Q9WVL2 | Stat2 | 153162 | Stat1     | signal transducer and activator of transcription 1         | ENSMUSG00000026104  |
| Q9WVL2 | Stat2 | 179916 | Cxcl10    | chemokine (C-X-C motif) ligand 10                          | ENSMUSG00000034855  |
| Q9WVL2 | Stat2 | 211637 | Stat3     | signal transducer and activator of transcription 3         | ENSMUSG00000004040  |
| Q9WVL2 | Stat2 | 164791 | Adar      | adenosine deaminase, RNA-specific                          | ENSMUSG00000027951  |
| Q9WVL2 | Stat2 | 191036 | Trp53     | transformation related protein 53                          | ENSMUSG00000059552  |
| Q9WVL2 | Stat2 | 8992   | EP300     | E1A binding protein p300                                   | ENSG00000100393     |
| Q9WVL2 | Stat2 | 195818 | Tlr9      | toll-like receptor 9                                       | ENSMUSG00000045322  |
| Q9WVL2 | Stat2 | 195445 | Nfkb1     | nuclear factor of kappa light polypeptide gene enhancer in | ENSMUSG00000028163  |
| Q9WVL2 | Stat2 | 202909 | Trim21    | tripartite motif-containing 21                             | ENSMUSG00000030966  |
| Q9WVL2 | Stat2 | 170616 | Tap1      | transporter 1, ATP-binding cassette, sub-family B (MDR/T   | ENSMUSG00000037321  |
| Q9WVL2 | Stat2 | 171492 | Il15      | interleukin 15                                             | ENSMUSG00000031712  |
| Q9WVL2 | Stat2 | 197330 | Gbp2      | guanylate binding protein 2                                | ENSMUSG00000028270  |
| Q9WVL2 | Stat2 | 131701 | Cmpk2     | cytidine monophosphate (UMP-CMP) kinase 2, mitochondri     | ENSMUSG00000020638  |
| Q9WVL2 | Stat2 | 262893 | Ifi47     | interferon gamma inducible protein 47                      | ENSMUSG00000078920  |
| Q9WVL2 | Stat2 | 182249 | Dusp28    | dual specificity phosphatase 28                            | ENSMUSG00000047067  |
| Q9WVL2 | Stat2 | 131692 | Tcea1     | transcription elongation factor A (SII) 1                  | ENSMUSG00000033813  |
| Q9WVL2 | Stat2 | 157249 | Cd274     | CD274 antigen                                              | ENSMUSG00000016496  |
| Q9WVL2 | Stat2 | 214638 | Lgals3bp  | lectin, galactoside-binding, soluble, 3 binding protein    | ENSMUSG00000033880  |
| Q9WVL2 | Stat2 | 196676 | Oas1a     | 2'-5' oligoadenylate synthetase 1A                         | ENSMUSG00000052776  |
| Q9WVL2 | Stat2 | 196543 | Oas1b     | 2'-5' oligoadenylate synthetase 1B                         | ENSMUSG00000029605  |
| Q9WVL2 | Stat2 | 212081 | Irf7      | interferon regulatory factor 7                             | ENSMUSG00000025498  |
| Q9WTK7 | Stk11 | 64029  | UBC       | ubiquitin C                                                | ENSG00000150991     |
| Q9WTK7 | Stk11 | 171698 | Stk11ip   | serine/threonine kinase 11 interacting protein             | ENSMUSG00000026213  |
| Q9WTK7 | Stk11 | 191855 | Nuak2     | NUAK family, SNF1-like kinase, 2                           | ENSMUSG00000009772  |
| O55106 | Strn  | 86408  | MST4      | Serine/threonine-protein kinase MST4                       | ENSG00000134602     |
| O55106 | Strn  | 1301   | CCT8      | chaperonin containing TCP1, subunit 8 (theta)              | ENSG00000156261     |
| O55106 | Strn  | 101319 | SIKE1     | suppressor of IKBKE 1                                      | ENSG00000052723     |
| O55106 | Strn  | 64018  | PDCD10    | programmed cell death 10                                   | ENSG00000114209     |
| O55106 | Strn  | 17442  | CCT6A     | chaperonin containing TCP1, subunit 6A (zeta 1)            | ENSG00000146731     |
| O55106 | Strn  | 53426  | CCT4      | chaperonin containing TCP1, subunit 4 (delta)              | ENSG00000115484     |
| O55106 | Strn  | 41431  | SLMAP     | sarcolemma associated protein                              | ENSG00000163681     |
| O55106 | Strn  | 40853  | CCT6B     | chaperonin containing TCP1, subunit 6B (zeta 2)            | ENSG00000132141     |
| O55106 | Strn  | 37897  | CTTNBP2   | cortactin binding protein 2                                | ENSG00000077063     |
| O55106 | Strn  | 58963  | STRN4     | striatin, calmodulin binding protein 4                     | ENSG00000090372     |
| O55106 | Strn  | 47181  | CCT2      | chaperonin containing TCP1, subunit 2 (beta)               | ENSG00000166226     |
| O55106 | Strn  | 101107 | CTTNBP2NL | CTTNBP2 N-terminal like                                    | ENSG00000143079     |
| O55106 | Strn  | 70936  | PPP2R1B   | protein phosphatase 2, regulatory subunit A, beta          | ENSG00000137713     |
| O55106 | Strn  | 4317   | STRN3     | striatin, calmodulin binding protein 3                     | ENSG00000196792     |
| O55106 | Strn  | 78011  | MOB4      | MOB family member 4, phocein                               | ENSG00000115540     |
| O55106 | Strn  | 66700  | PPP2R1A   | protein phosphatase 2, regulatory subunit A, alpha         | ENSG00000105568     |
| O55106 | Strn  | 103469 | CCT3      | chaperonin containing TCP1, subunit 3 (gamma)              | ENSG00000163468     |
| O55106 | Strn  | 85164  | STK25     | serine/threonine kinase 25                                 | ENSG00000115694     |
| O55106 | Strn  | 44849  | STK24     | serine/threonine kinase 24                                 | ENSG00000102572     |
| O55106 | Strn  | 56424  | CCT7      | chaperonin containing TCP1, subunit 7 (eta)                | ENSG00000135624     |
| O55106 | Strn  | 24333  | FGFR1OP2  | FGFR1 oncogene partner 2                                   | ENSG00000111790     |
| O55106 | Strn  | 44693  | PPP2CA    | protein phosphatase 2, catalytic subunit, alpha isozyme    | ENSG00000113575     |
| O55106 | Strn  | 98570  | TCP1      | t-complex 1                                                | ENSG00000120438     |
| O55106 | Strn  | 12328  | CCT5      | chaperonin containing TCP1, subunit 5 (epsilon)            | ENSG00000150753     |
| O55106 | Strn  | 100940 | FAM40A    | family with sequence similarity 40, member A               | ENSG00000143093     |
| O55106 | Strn  | 40839  | FAM40B    | family with sequence similarity 40, member B               | ENSG00000128578     |
| O35526 | Stx1a | 207465 | Chgb      | chromogranin B                                             | ENSMUSG000000027350 |
| O35526 | Stx1a | 165906 | Chqa      | chromogranin A                                             | ENSMUSG00000021194  |
| O35526 | Stx1a | 1609   | SOD1      | superoxide dismutase 1, soluble                            | ENSG00000142168     |
| O35526 | Stx1a | 194117 | Syt2      | synaptotagmin II                                           | ENSMUSG00000026452  |
| O35526 | Stx1a | 207842 | Snap25    | synaptosomal-associated protein 25                         | ENSMUSG00000027273  |
| O35526 | Stx1a | 207019 | Cltc      | clathrin, heavy polypeptide (Hc)                           | ENSMUSG000000047126 |
| O35526 | Stx1a | 175573 | Gria1     | glutamate receptor, ionotropic, AMPA1 (alpha 1)            | ENSMUSG00000020524  |
| O35526 | Stx1a | 193317 | Dlq4      | discs, large homolog 4 (Drosophila)                        | ENSMUSG00000020886  |
| O35526 | Stx1a | 150657 | Camk2a    | calcium/calmodulin-dependent protein kinase II alpha       | ENSMUSG00000024617  |
| O35526 | Stx1a | 210393 | Stx1b     | syntaxin 1B                                                | ENSMUSG00000030806  |
| O35526 | Stx1a | 30077  | SNCA      | synuclein, alpha (non A4 component of amyloid precursor    | ENSG00000145335     |
| O35526 | Stx1a | 137748 | Kcnma1    | potassium large conductance calcium-activated channel, s   | ENSMUSG00000063142  |
| O35526 | Stx1a | 159551 | Dnm1      | dynamitin 1                                                | ENSMUSG00000026825  |
| O35526 | Stx1a | 161623 | Stxbp1    | syntaxin binding protein 1                                 | ENSMUSG00000026797  |
| O35526 | Stx1a | 189759 | Vamp2     | vesicle-associated membrane protein 2                      | ENSMUSG00000020894  |
| O35526 | Stx1a | 129240 | Syp       | synaptophysin                                              | ENSMUSG000000031144 |
| O35526 | Stx1a | 170932 | Atp4a     | ATPase, H+/K+ exchanging, gastric, alpha polypeptide       | ENSMUSG00000005553  |
| O35526 | Stx1a | 179812 | Atp1a1    | ATPase, Na+/K+ transporting, alpha 1 polypeptide           | ENSMUSG00000033161  |
| O35526 | Stx1a | 156172 | Atp1a3    | ATPase, Na+/K+ transporting, alpha 3 polypeptide           | ENSMUSG000000040907 |
| O35526 | Stx1a | 205352 | Atp1a2    | ATPase, Na+/K+ transporting, alpha 2 polypeptide           | ENSMUSG00000007097  |
| O35526 | Stx1a | 147527 | Slc30a3   | solute carrier family 30 (zinc transporter), member 3      | ENSMUSG000000029151 |
| O35526 | Stx1a | 187917 | Atp6v0d1  | ATPase, H+ transporting, lysosomal V0 subunit D1           | ENSMUSG00000013160  |
| O35526 | Stx1a | 181138 | Gnao1     | guanine nucleotide binding protein, alpha O                | ENSMUSG00000031748  |
| O35526 | Stx1a | 207606 | Gnb1      | guanine nucleotide binding protein (G protein), beta 1     | ENSMUSG00000029064  |
| O35526 | Stx1a | 188200 | Gnb3      | guanine nucleotide binding protein (G protein), beta 3     | ENSMUSG00000023439  |
| O35526 | Stx1a | 209032 | Napb      | N-ethylmaleimide sensitive fusion protein attachment pro   | ENSMUSG000000027438 |
| O35526 | Stx1a | 155754 | Gpm6a     | glycoprotein m6a                                           | ENSMUSG00000031517  |
| O35526 | Stx1a | 138466 | Stx7      | syntaxin 7                                                 | ENSMUSG00000019998  |
| O35526 | Stx1a | 201307 | Ubc       | ubiquitin C                                                | ENSMUSG000000008348 |
| O35526 | Stx1a | 152558 | Snca      | synuclein, alpha                                           | ENSMUSG000000025889 |
| O35526 | Stx1a | 206436 | Vps16     | vacuolar protein sorting 16 (yeast)                        | ENSMUSG000000027411 |
| O35526 | Stx1a | 213066 | Nsf       | N-ethylmaleimide sensitive fusion protein                  | ENSMUSG00000034187  |
| O35526 | Stx1a | 27257  | LRRK2     | leucine-rich repeat kinase 2                               | ENSG00000188906     |
| O35526 | Stx1a | 175625 | Lrrk2     | leucine-rich repeat kinase 2                               | ENSMUSG000000036273 |
| P61264 | Stx1b | 207842 | Snap25    | synaptosomal-associated protein 25                         | ENSMUSG00000027273  |

|        |       |        |          |                                                                     |                     |
|--------|-------|--------|----------|---------------------------------------------------------------------|---------------------|
| P61264 | Stx1b | 203389 | Stx1a    | syntaxin 1A (brain)                                                 | ENSMUSG00000007207  |
| P61264 | Stx1b | 207019 | Cltc     | clathrin, heavy polypeptide (Hc)                                    | ENSMUSG000000047126 |
| P61264 | Stx1b | 175573 | Gria1    | glutamate receptor, ionotropic, AMPA1 (alpha 1)                     | ENSMUSG00000020524  |
| P61264 | Stx1b | 193317 | Dlq4     | discs, large homolog 4 (Drosophila)                                 | ENSMUSG00000020886  |
| P61264 | Stx1b | 150657 | Camk2a   | calcium/calmodulin-dependent protein kinase II alpha                | ENSMUSG00000024617  |
| P61264 | Stx1b | 189759 | Vamp2    | vesicle-associated membrane protein 2                               | ENSMUSG00000020894  |
| P61264 | Stx1b | 159551 | Dnm1     | dynamitin 1                                                         | ENSMUSG00000026825  |
| P61264 | Stx1b | 129240 | Syp      | synaptophysin                                                       | ENSMUSG00000031144  |
| P61264 | Stx1b | 170932 | Atp4a    | ATPase, H+/K+ exchanging, gastric, alpha polypeptide                | ENSMUSG00000005553  |
| P61264 | Stx1b | 179812 | Atp1a1   | ATPase, Na+/K+ transporting, alpha 1 polypeptide                    | ENSMUSG00000033161  |
| P61264 | Stx1b | 156172 | Atp1a3   | ATPase, Na+/K+ transporting, alpha 3 polypeptide                    | ENSMUSG00000040907  |
| P61264 | Stx1b | 205352 | Atp1a2   | ATPase, Na+/K+ transporting, alpha 2 polypeptide                    | ENSMUSG00000007097  |
| P61264 | Stx1b | 147527 | Slc30a3  | solute carrier family 30 (zinc transporter), member 3               | ENSMUSG00000029151  |
| P61264 | Stx1b | 187917 | Atp6v0d1 | ATPase, H+ transporting, lysosomal V0 subunit D1                    | ENSMUSG00000013160  |
| P61264 | Stx1b | 181138 | Gnao1    | guanine nucleotide binding protein, alpha O                         | ENSMUSG00000031748  |
| P61264 | Stx1b | 207606 | Gnb1     | guanine nucleotide binding protein (G protein), beta 1              | ENSMUSG00000029064  |
| P61264 | Stx1b | 188200 | Gnb3     | guanine nucleotide binding protein (G protein), beta 3              | ENSMUSG00000023439  |
| P61264 | Stx1b | 209032 | Napb     | N-ethylmaleimide sensitive fusion protein attachment protein        | ENSMUSG00000027438  |
| P61264 | Stx1b | 155754 | Gpm6a    | glycoprotein m6a                                                    | ENSMUSG00000031517  |
| P61264 | Stx1b | 138466 | Stx7     | syntaxin 7                                                          | ENSMUSG00000019998  |
| P61264 | Stx1b | 174739 | Sv2a     | synaptic vesicle glycoprotein 2 a                                   | ENSMUSG00000038486  |
| P61264 | Stx1b | 205183 | Ap2b1    | adaptor-related protein complex 2, beta 1 subunit                   | ENSMUSG00000035152  |
| P61264 | Stx1b | 180315 | Ap2a1    | adaptor protein complex AP-2, alpha 1 subunit                       | ENSMUSG00000060279  |
| P61264 | Stx1b | 143791 | Ap1b1    | adaptor protein complex AP-1, beta 1 subunit                        | ENSMUSG00000009090  |
| P61264 | Stx1b | 135538 | Syn1     | synapsin I                                                          | ENSMUSG00000037217  |
| P61264 | Stx1b | 189699 | Snap91   | synaptosomal-associated protein 91                                  | ENSMUSG00000033419  |
| P61264 | Stx1b | 213066 | Nsf      | N-ethylmaleimide sensitive fusion protein                           | ENSMUSG00000034187  |
| P61264 | Stx1b | 27257  | LRRK2    | leucine-rich repeat kinase 2                                        | ENSG00000188906     |
| P61264 | Stx1b | 159493 | Acta2    | actin, alpha 2, smooth muscle, aorta                                | ENSMUSG00000035783  |
| P61264 | Stx1b | 132306 | Cadps    | Ca2+-dependent secretion activator                                  | ENSMUSG00000054423  |
| Q64332 | Syn2  | 146219 | Pfn2     | profilin 2                                                          | ENSMUSG00000027805  |
| Q64332 | Syn2  | 200597 | Ywhae    | tyrosine 3-monooxygenase/tryptophan 5-monooxygenase                 | ENSMUSG00000020849  |
| P46096 | Syt1  | 22989  | SCAMP5   | secretory carrier membrane protein 5                                | ENSG00000198794     |
| P46096 | Syt1  | 194117 | Syt2     | synaptotagmin II                                                    | ENSMUSG00000026452  |
| P46096 | Syt1  | 182053 | Tuba1c   | tubulin, alpha 1C                                                   | ENSMUSG000000043091 |
| P46096 | Syt1  | 211715 | Atp6v0a1 | ATPase, H+ transporting, lysosomal V0 subunit A1                    | ENSMUSG00000019302  |
| P46096 | Syt1  | 163852 | Calm1    | calmodulin 1                                                        | ENSMUSG00000001175  |
| P46096 | Syt1  | 155394 | Thy1     | thymus cell antigen 1, theta                                        | ENSMUSG000000032011 |
| P46096 | Syt1  | 207842 | Snap25   | synaptosomal-associated protein 25                                  | ENSMUSG00000027273  |
| P46096 | Syt1  | 214779 | Actg1    | actin, gamma, cytoplasmic 1                                         | ENSMUSG00000062825  |
| P46096 | Syt1  | 186203 | Gnat2    | guanine nucleotide binding protein, alpha transducing 2             | ENSMUSG00000009108  |
| P46096 | Syt1  | 193462 | Slc1a2   | solute carrier family 1 (glial high affinity glutamate transporter) | ENSMUSG00000005089  |
| P46096 | Syt1  | 144350 | Tubb2c   | tubulin, beta 2C                                                    | ENSMUSG00000036752  |
| P46096 | Syt1  | 189759 | Vamp2    | vesicle-associated membrane protein 2                               | ENSMUSG00000020894  |
| P46096 | Syt1  | 129240 | Syp      | synaptophysin                                                       | ENSMUSG00000031144  |
| P46096 | Syt1  | 177962 | Pip5k1c  | phosphatidylinositol-4-phosphate 5-kinase, type 1 gamma             | ENSMUSG00000034902  |
| Q9R0N4 | Syt10 | 181512 | Syt6     | synaptotagmin VI                                                    | ENSMUSG00000027849  |
| Q9R0N4 | Syt10 | 178707 | Syt3     | synaptotagmin III                                                   | ENSMUSG00000030731  |
| Q9R0N4 | Syt10 | 205388 | Syt9     | synaptotagmin IX                                                    | ENSMUSG00000062542  |
| Q9R0Q1 | Syt4  | 167493 | Rab8a    | RAB8A, member RAS oncogene family                                   | ENSMUSG00000003037  |
| Q9R0Q1 | Syt4  | 164008 | Rab3a    | RAB3A, member RAS oncogene family                                   | ENSMUSG00000031840  |
| Q9R0Q1 | Syt4  | 184264 | Rab27a   | RAB27A, member RAS oncogene family                                  | ENSMUSG00000032202  |
| Q9R0Q1 | Syt4  | 156998 | Rab27b   | RAB27B, member RAS oncogene family                                  | ENSMUSG00000024511  |
| Q8R2K4 | Taf6l | 211539 | Kat2a    | K(lysine) acetyltransferase 2A                                      | ENSMUSG00000020918  |
| Q8R2K4 | Taf6l | 205939 | Tada2a   | transcriptional adaptor 2A                                          | ENSMUSG00000018651  |
| Q8R2K4 | Taf6l | 132631 | Atxn7    | ataxin 7                                                            | ENSMUSG00000021738  |
| Q8R2K4 | Taf6l | 134374 | Atxn7l1  | ataxin 7-like 1                                                     | ENSMUSG00000020564  |
| Q8R2K4 | Taf6l | 212566 | Atxn7l3  | ataxin 7-like 3                                                     | ENSMUSG00000059995  |
| Q8R2K4 | Taf6l | 208472 | Csrp2bp  | cysteine and glycine-rich protein 2 binding protein                 | ENSMUSG00000027425  |
| Q8R2K4 | Taf6l | 141131 | Mbpip    | MAP3K12 binding inhibitory protein 1                                | ENSMUSG00000021028  |
| Q8R2K4 | Taf6l | 210500 | Med1     | mediator complex subunit 1                                          | ENSMUSG00000018160  |
| Q8R2K4 | Taf6l | 253359 | Med12    | mediator of RNA polymerase II transcription, subunit 12 H           | ENSMUSG00000079487  |
| Q8R2K4 | Taf6l | 206853 | Med13    | mediator complex subunit 13                                         | ENSMUSG00000034297  |
| Q8R2K4 | Taf6l | 132282 | Med14    | mediator complex subunit 14                                         | ENSMUSG00000064127  |
| Q8R2K4 | Taf6l | 139947 | Med15    | mediator complex subunit 15                                         | ENSMUSG00000012114  |
| Q8R2K4 | Taf6l | 171451 | Med16    | mediator complex subunit 16                                         | ENSMUSG00000013833  |
| Q8R2K4 | Taf6l | 135069 | Med17    | mediator complex subunit 17                                         | ENSMUSG00000031935  |
| Q8R2K4 | Taf6l | 194008 | Med18    | mediator of RNA polymerase II transcription, subunit 18 H           | ENSMUSG00000066042  |
| Q8R2K4 | Taf6l | 198395 | Med21    | mediator complex subunit 21                                         | ENSMUSG00000030291  |
| Q8R2K4 | Taf6l | 139123 | Med23    | mediator complex subunit 23                                         | ENSMUSG00000019984  |
| Q8R2K4 | Taf6l | 210636 | Med24    | mediator complex subunit 24                                         | ENSMUSG00000017210  |
| Q8R2K4 | Taf6l | 168279 | Med26    | mediator complex subunit 26                                         | ENSMUSG00000045248  |
| Q8R2K4 | Taf6l | 153778 | Med27    | mediator complex subunit 27                                         | ENSMUSG00000026799  |
| Q8R2K4 | Taf6l | 162461 | Med28    | mediator of RNA polymerase II transcription, subunit 28 H           | ENSMUSG00000015804  |
| Q8R2K4 | Taf6l | 196398 | Med31    | mediator of RNA polymerase II transcription, subunit 31 H           | ENSMUSG00000020801  |
| Q8R2K4 | Taf6l | 180055 | Med4     | mediator of RNA polymerase II transcription, subunit 4 H            | ENSMUSG00000022109  |
| Q8R2K4 | Taf6l | 154516 | Med6     | mediator of RNA polymerase II transcription, subunit 6 H            | ENSMUSG00000002679  |
| Q8R2K4 | Taf6l | 181342 | Med8     | mediator of RNA polymerase II transcription, subunit 8 H            | ENSMUSG00000006392  |
| Q8R2K4 | Taf6l | 187799 | Dr1      | down-regulator of transcription 1                                   | ENSMUSG00000029265  |
| Q8R2K4 | Taf6l | 191826 | Polr2a   | polymerase (RNA) II (DNA directed) polypeptide A                    | ENSMUSG00000005198  |
| Q8R2K4 | Taf6l | 174132 | Polr2b   | polymerase (RNA) II (DNA directed) polypeptide B                    | ENSMUSG00000029250  |
| Q8R2K4 | Taf6l | 209697 | Ccdc101  | coiled-coil domain containing 101                                   | ENSMUSG00000030714  |
| Q8R2K4 | Taf6l | 209007 | Spata20  | spermatogenesis associated 20                                       | ENSMUSG00000020867  |
| Q8R2K4 | Taf6l | 207998 | Sptlc3   | serine palmitoyltransferase, long chain base subunit 3              | ENSMUSG00000039092  |
| Q8R2K4 | Taf6l | 203046 | Tada1    | transcriptional adaptor 1                                           | ENSMUSG00000026563  |
| Q8R2K4 | Taf6l | 176433 | Tada3    | transcriptional adaptor 3                                           | ENSMUSG00000048930  |
| Q8R2K4 | Taf6l | 204983 | Taf10    | TAF10 RNA polymerase II, TATA box binding protein (TBP)             | ENSMUSG000000043866 |
| Q8R2K4 | Taf6l | 193751 | Taf12    | TAF12 RNA polymerase II, TATA box binding protein (TBP)             | ENSMUSG00000028899  |
| Q8R2K4 | Taf6l | 199943 | Taf5l    | TAF5-like RNA polymerase II, p300/CBP-associated factor             | ENSMUSG00000038697  |

|        |         |        |         |                                                             |                     |
|--------|---------|--------|---------|-------------------------------------------------------------|---------------------|
| Q8R2K4 | Taf6l   | 178346 | Taf9    | TAF9 RNA polymerase II, TATA box binding protein (TBP)-     | ENSMUSG00000052293  |
| Q8R2K4 | Taf6l   | 208186 | Tirrap  | transformation/transcription domain-associated protein      | ENSMUSG00000045482  |
| Q8R2K4 | Taf6l   | 182297 | Usp22   | ubiquitin specific peptidase 22                             | ENSMUSG00000042506  |
| Q8R2K4 | Taf6l   | 151154 | Wdr5    | WD repeat domain 5                                          | ENSMUSG00000026917  |
| Q8R2K4 | Taf6l   | 143426 | Yeats2  | YEATS domain containing 2                                   | ENSMUSG00000041215  |
| Q8R2K4 | Taf6l   | 200277 | Zzz3    | zinc finger, ZZ domain containing 3                         | ENSMUSG00000039068  |
| Q8R2K4 | Taf6l   | 186515 | Atxn7l2 | ataxin 7-like 2                                             | ENSMUSG00000048997  |
| Q8R2K4 | Taf6l   | 606312 | Med20   | mediator complex subunit 20                                 | ENSMUSG00000092558  |
| P37804 | Tagln   | 175693 | Smad3   | MAD homolog 3 (Drosophila)                                  | ENSMUSG00000032402  |
| Q8VD31 | Tappbp  | 196509 | Irf8    | interferon regulatory factor 8                              | ENSMUSG00000041515  |
| Q3UKC1 | Tax1bp1 | 164495 | Shc1    | src homology 2 domain-containing transforming protein C     | ENSMUSG00000042626  |
| Q3UKC1 | Tax1bp1 | 210517 | Itch    | itchy, E3 ubiquitin protein ligase                          | ENSMUSG00000027598  |
| Q3UKC1 | Tax1bp1 | 195143 | Ralbp1  | ralA binding protein 1                                      | ENSMUSG00000024096  |
| Q3UKC1 | Tax1bp1 | 135792 | Tnfaip3 | tumor necrosis factor, alpha-induced protein 3              | ENSMUSG00000019850  |
| Q3UKC1 | Tax1bp1 | 174575 | Rnf11   | ring finger protein 11                                      | ENSMUSG00000028557  |
| Q3UKC1 | Tax1bp1 | 193222 | Traf6   | TNF receptor-associated factor 6                            | ENSMUSG00000027164  |
| Q3UKC1 | Tax1bp1 | 146254 | Traf2   | TNF receptor-associated factor 2                            | ENSMUSG00000026942  |
| Q3UKC1 | Tax1bp1 | 187167 | Ube2n   | ubiquitin-conjugating enzyme E2N                            | ENSMUSG00000074781  |
| Q3UKC1 | Tax1bp1 | 269073 | Ube2d3  | ubiquitin-conjugating enzyme E2D 3 (UBC4/5 homolog, y       | ENSMUSG00000078578  |
| Q3UKC1 | Tax1bp1 | 169132 | Chuk    | conserved helix-loop-helix ubiquitous kinase                | ENSMUSG00000025199  |
| O70306 | Tbx15   | 161051 | Tlx3    | T-cell leukemia, homeobox 3                                 | ENSMUSG00000040610  |
| P70326 | Tbx5    | 203632 | Baz1b   | bromodomain adjacent to zinc finger domain, 1B              | ENSMUSG00000002748  |
| P70326 | Tbx5    | 141000 | Smarca4 | SWI/SNF related, matrix associated, actin dependent regu    | ENSMUSG00000032187  |
| Q61286 | Tcf12   | 175763 | Tal1    | T-cell acute lymphocytic leukemia 1                         | ENSMUSG00000028717  |
| Q61286 | Tcf12   | 131550 | Id2     | inhibitor of DNA binding 2                                  | ENSMUSG00000020644  |
| Q61286 | Tcf12   | 209844 | Id1     | inhibitor of DNA binding 1                                  | ENSMUSG00000042745  |
| Q61286 | Tcf12   | 197682 | Id3     | inhibitor of DNA binding 3                                  | ENSMUSG00000007872  |
| Q61286 | Tcf12   | 175912 | Hand1   | heart and neural crest derivatives expressed transcript 1   | ENSMUSG00000037335  |
| Q61286 | Tcf12   | 197911 | Cbfa2t3 | core-binding factor, runt domain, alpha subunit 2, translo  | ENSMUSG00000006362  |
| Q921J1 | Tcf7l1  | 163730 | Traf1   | TNF receptor-associated factor 1                            | ENSMUSG00000026875  |
| Q921J1 | Tcf7l1  | 94257  | RUNX3   | runt-related transcription factor 3                         | ENSG00000020633     |
| Q921J1 | Tcf7l1  | 197682 | Id3     | inhibitor of DNA binding 3                                  | ENSMUSG00000007872  |
| P48301 | Tead2   | 146013 | Wwtr1   | WW domain containing transcription regulator 1              | ENSMUSG00000027803  |
| P48301 | Tead2   | 159280 | Mpdz    | multiple PDZ domain protein                                 | ENSMUSG00000028402  |
| P48301 | Tead2   | 133275 | Yap1    | yes-associated protein 1                                    | ENSMUSG00000053110  |
| Q62296 | Tead4   | 210153 | Tbx21   | T-box 21                                                    | ENSMUSG00000014444  |
| Q62296 | Tead4   | 146013 | Wwtr1   | WW domain containing transcription regulator 1              | ENSMUSG00000027803  |
| Q62296 | Tead4   | 133275 | Yap1    | yes-associated protein 1                                    | ENSMUSG00000053110  |
| Q02858 | Tek     | 210622 | Grb7    | growth factor receptor bound protein 7                      | ENSMUSG00000019312  |
| Q02858 | Tek     | 179481 | Dok2    | docking protein 2                                           | ENSMUSG00000022102  |
| Q02858 | Tek     | 174439 | Grb14   | growth factor receptor bound protein 14                     | ENSMUSG00000026888  |
| Q02858 | Tek     | 137812 | Anqpt1  | angiopoietin 1                                              | ENSMUSG00000022309  |
| Q02858 | Tek     | 137356 | Anqpt2  | angiopoietin 2                                              | ENSMUSG00000031465  |
| Q02858 | Tek     | 211637 | Stat3   | signal transducer and activator of transcription 3          | ENSMUSG00000004040  |
| Q02858 | Tek     | 46213  | GRB7    | growth factor receptor-bound protein 7                      | ENSG00000141738     |
| Q02858 | Tek     | 68262  | GRB2    | growth factor receptor-bound protein 2                      | ENSG00000177885     |
| Q02858 | Tek     | 25037  | PIK3R1  | phosphoinositide-3-kinase, regulatory subunit 1 (alpha)     | ENSG00000145675     |
| Q02858 | Tek     | 214339 | Grb2    | growth factor receptor bound protein 2                      | ENSMUSG00000059923  |
| Q02858 | Tek     | 178868 | Pik3r1  | phosphatidylinositol 3-kinase, regulatory subunit, polypep  | ENSMUSG00000041417  |
| Q02858 | Tek     | 196834 | Ptpn11  | protein tyrosine phosphatase, non-receptor type 11          | ENSMUSG00000043733  |
| Q02858 | Tek     | 186824 | Cbfb    | core binding factor beta                                    | ENSMUSG00000031885  |
| Q02858 | Tek     | 182846 | Dok4    | docking protein 4                                           | ENSMUSG00000040631  |
| Q9DC40 | Telo2   | 204403 | Mtor    | mechanistic target of rapamycin (serine/threonine kinase)   | ENSMUSG00000028991  |
| Q9DC40 | Telo2   | 165511 | Atm     | ataxia telangiectasia mutated homolog (human)               | ENSMUSG00000034218  |
| O70372 | Tert    | 144556 | Myc     | myelocytomatosis oncogene                                   | ENSMUSG000000022346 |
| O70372 | Tert    | 190689 | Nfat5   | nuclear factor of activated T-cells 5                       | ENSMUSG00000003847  |
| O70372 | Tert    | 201307 | Ubc     | ubiquitin C                                                 | ENSMUSG00000008348  |
| O70372 | Tert    | 173010 | Pinx1   | PIN2/TERF1 interacting, telomerase inhibitor 1              | ENSMUSG00000021958  |
| P40630 | Tfam    | 30077  | SNCA    | synuclein, alpha (non A4 component of amyloid precursor     | ENSG00000145335     |
| Q62219 | Tgfb11  | 37147  | PTK2    | PTK2 protein tyrosine kinase 2                              | ENSG00000169398     |
| Q62219 | Tgfb11  | 11161  | SLC6A3  | solute carrier family 6 (neurotransmitter transporter, dopa | ENSG00000142319     |
| Q62219 | Tgfb11  | 161051 | Tlx3    | T-cell leukemia, homeobox 3                                 | ENSMUSG00000040610  |
| Q62219 | Tgfb11  | 201554 | Git1    | G protein-coupled receptor kinase-interactor 1              | ENSMUSG00000011877  |
| Q62312 | Tgfb2   | 189923 | Nfya    | nuclear transcription factor-Y alpha                        | ENSMUSG00000023994  |
| Q62312 | Tgfb2   | 164495 | Shc1    | src homology 2 domain-containing transforming protein C     | ENSMUSG00000042626  |
| Q62312 | Tgfb2   | 185502 | Acvrl1  | activin A receptor, type II-like 1                          | ENSMUSG00000000530  |
| Q62312 | Tgfb2   | 185038 | Cdh5    | cadherin 5                                                  | ENSMUSG00000031871  |
| Q62312 | Tgfb2   | 160783 | Enq     | endoglin                                                    | ENSMUSG00000026814  |
| Q62312 | Tgfb2   | 146050 | Tgfb1   | transforming growth factor, beta receptor I                 | ENSMUSG00000007613  |
| Q62312 | Tgfb2   | 132962 | Map3k7  | mitogen-activated protein kinase kinase kinase 7            | ENSMUSG00000028284  |
| Q62312 | Tgfb2   | 40102  | TRAF6   | TNF receptor-associated factor 6                            | ENSG00000175104     |
| Q62312 | Tgfb2   | 194461 | Elf3    | E74-like factor 3                                           | ENSMUSG00000003051  |
| Q62312 | Tgfb2   | 159220 | Nes     | nestin                                                      | ENSMUSG00000004891  |
| Q62312 | Tgfb2   | 192095 | Cntn2   | contactin 2                                                 | ENSMUSG00000053024  |
| Q62312 | Tgfb2   | 158292 | Tgfb1   | transforming growth factor, beta 1                          | ENSMUSG00000002603  |
| Q62314 | Tgln1   | 1609   | SOD1    | superoxide dismutase 1, soluble                             | ENSG00000142168     |
| P35441 | Thbs1   | 134620 | Dmtf1   | cyclin D binding myb-like transcription factor 1            | ENSMUSG00000042508  |
| P35441 | Thbs1   | 138710 | Thbs2   | thrombospondin 2                                            | ENSMUSG00000023885  |
| Q06806 | Tie1    | 178868 | Pik3r1  | phosphatidylinositol 3-kinase, regulatory subunit, polypep  | ENSMUSG00000041417  |
| Q90XY1 | Tjp3    | 150373 | Cldn1   | claudin 1                                                   | ENSMUSG000000022512 |
| Q90XY1 | Tjp3    | 212780 | Gjc1    | gap junction protein, gamma 1                               | ENSMUSG00000034520  |
| Q08122 | Tle3    | 175763 | Tal1    | T-cell acute lymphocytic leukemia 1                         | ENSMUSG00000028717  |
| Q6R5P0 | Tlr11   | 196509 | Irf8    | interferon regulatory factor 8                              | ENSMUSG00000041515  |
| Q6R5P0 | Tlr11   | 194461 | Elf3    | E74-like factor 3                                           | ENSMUSG00000003051  |
| Q6R5P0 | Tlr11   | 193807 | Ehf     | ets homologous factor                                       | ENSMUSG00000012350  |
| Q61033 | Tmpo    | 617    | LAMA1   | laminin, alpha 1                                            | ENSG00000101680     |
| Q61033 | Tmpo    | 165010 | Gmcl1   | germ cell-less homolog 1 (Drosophila)                       | ENSMUSG00000001157  |
| Q9D2E2 | Toe1    | 185563 | Aicda   | activation-induced cytidine deaminase                       | ENSMUSG00000040627  |
| Q9D2E2 | Toe1    | 148105 | Wdfy4   | WD repeat and FYVE domain containing 4                      | ENSMUSG00000051506  |

|        |         |        |              |                                                                           |                    |
|--------|---------|--------|--------------|---------------------------------------------------------------------------|--------------------|
| Q9D2E2 | Toe1    | 198150 | Fam129a      | family with sequence similarity 129, member A                             | ENSMUSG00000026483 |
| Q9D2E2 | Toe1    | 149105 | Sympk        | symplekin                                                                 | ENSMUSG00000023118 |
| Q9D2E2 | Toe1    | 171593 | Dync1h1      | dynein cytoplasmic 1 heavy chain 1                                        | ENSMUSG00000018707 |
| Q9D2E2 | Toe1    | 129626 | Pdia6        | protein disulfide isomerase associated 6                                  | ENSMUSG00000020571 |
| Q9D2E2 | Toe1    | 134704 | Mre11a       | meiotic recombination 11 homolog A (S. cerevisiae)                        | ENSMUSG00000031928 |
| Q9D2E2 | Toe1    | 194403 | Ddx47        | DEAD (Asp-Glu-Ala-Asp) box polypeptide 47                                 | ENSMUSG00000030204 |
| Q9D2E2 | Toe1    | 214390 | Galk1        | galactokinase 1                                                           | ENSMUSG00000020766 |
| Q9D2E2 | Toe1    | 176026 | Rpl4         | ribosomal protein L4                                                      | ENSMUSG00000032399 |
| Q9D2E2 | Toe1    | 142542 | Serpinb1a    | serine (or cysteine) peptidase inhibitor, clade B, member                 | ENSMUSG00000044734 |
| Q9CZW5 | Tomm70a | 145251 | Pdpk1        | 3-phosphoinositide dependent protein kinase 1                             | ENSMUSG00000024122 |
| Q9CZW5 | Tomm70a | 197148 | Rgs13        | regulator of G-protein signaling 13                                       | ENSMUSG00000051079 |
| O70157 | Top3a   | 8521   | RPA3         | replication protein A3, 14kDa                                             | ENSG00000106399    |
| O70157 | Top3a   | 95078  | RPA2         | replication protein A2, 32kDa                                             | ENSG00000117748    |
| O70157 | Top3a   | 44535  | SSBP1        | single-stranded DNA binding protein 1                                     | ENSG00000106028    |
| O70157 | Top3a   | 30365  | BLM          | Bloom syndrome, RecQ helicase-like                                        | ENSG00000197299    |
| O70157 | Top3a   | 14585  | RM12         | RM12, RecQ mediated genome instability 2, homolog (S. d                   | ENSG00000175643    |
| O70157 | Top3a   | 74108  | RM11         | RM11, RecQ mediated genome instability 1, homolog (S. d                   | ENSG00000178966    |
| O70157 | Top3a   | 45367  | C2orf56      | chromosome 2 open reading frame 56                                        | ENSG00000003509    |
| O70157 | Top3a   | 33849  | TOP3A        | topoisomerase (DNA) III alpha                                             | ENSG00000177302    |
| O70157 | Top3a   | 404450 | PGAM5        | phosphoglycerate mutase family member 5                                   | ENSG00000247077    |
| Q9R1R2 | Trim3   | 30077  | SNCA         | synuclein, alpha (non A4 component of amyloid precursor                   | ENSG00000145333    |
| Q9R1R2 | Trim3   | 7492   | ZFYVE28      | zinc finger, FYVE domain containing 28                                    | ENSG00000159735    |
| Q80V11 | Trim56  | 47893  | TMEM173      | transmembrane protein 173                                                 | ENSG00000184584    |
| Q37X08 | Trmt1   | 175763 | Tal1         | T-cell acute lymphocytic leukemia 1                                       | ENSMUSG00000028717 |
| Q9QZC1 | Trpc3   | 67841  | PRKCG        | protein kinase C, gamma                                                   | ENSG00000126583    |
| Q8K424 | Trpv3   | 16933  | EGFR         | epidermal growth factor receptor                                          | ENSG00000146648    |
| P69744 | Trpv5   | 148350 | Slc9a3r2     | solute carrier family 9 (sodium/hydrogen exchanger), me                   | ENSMUSG00000002504 |
| P68368 | Tuba4a  | 152695 | Sykb         | spleen tyrosine kinase                                                    | ENSMUSG00000021457 |
| P68368 | Tuba4a  | 30077  | SNCA         | synuclein, alpha (non A4 component of amyloid precursor                   | ENSG00000145333    |
| P68368 | Tuba4a  | 207842 | Snap25       | synaptosomal-associated protein 25                                        | ENSMUSG00000027273 |
| P68368 | Tuba4a  | 183835 | Nckap1       | NCK-associated protein 1                                                  | ENSMUSG00000027002 |
| P68368 | Tuba4a  | 179812 | Atp1a1       | ATPase, Na <sup>+</sup> /K <sup>+</sup> transporting, alpha 1 polypeptide | ENSMUSG00000033161 |
| P68368 | Tuba4a  | 168772 | Kif5c        | kinesin family member 5C                                                  | ENSMUSG00000026764 |
| P68368 | Tuba4a  | 127944 | Kif5b        | kinesin family member 5B                                                  | ENSMUSG00000006740 |
| P68368 | Tuba4a  | 180315 | Ap2a1        | adaptor protein complex AP-2, alpha 1 subunit                             | ENSMUSG00000060279 |
| P68368 | Tuba4a  | 131026 | Pacs1        | phosphofurin acidic cluster sorting protein 1                             | ENSMUSG00000024855 |
| P68368 | Tuba4a  | 205183 | Ap2b1        | adaptor-related protein complex 2, beta 1 subunit                         | ENSMUSG00000035152 |
| P68368 | Tuba4a  | 200612 | Mtap6        | microtubule-associated protein 6                                          | ENSMUSG00000055407 |
| P68368 | Tuba4a  | 181984 | Tuba1a       | tubulin, alpha 1A                                                         | ENSMUSG00000072235 |
| P68368 | Tuba4a  | 198630 | Hspg2        | perlecan (heparan sulfate proteoglycan 2)                                 | ENSMUSG00000028763 |
| P68368 | Tuba4a  | 262062 | Gm3272       | predicted pseudogene 3272                                                 | ENSMUSG00000078967 |
| P68368 | Tuba4a  | 129240 | Syp          | synaptophysin                                                             | ENSMUSG00000031144 |
| P68368 | Tuba4a  | 143914 | Tubb2a       | tubulin, beta 2A                                                          | ENSMUSG00000058672 |
| P68368 | Tuba4a  | 191004 | Zfhx3        | zinc finger homeobox 3                                                    | ENSMUSG00000038872 |
| P68368 | Tuba4a  | 187917 | Atp6v0d1     | ATPase, H <sup>+</sup> transporting, lysosomal V0 subunit D1              | ENSMUSG00000013160 |
| P68368 | Tuba4a  | 179144 | Tubb5        | tubulin, beta 5                                                           | ENSMUSG00000001525 |
| P68368 | Tuba4a  | 214779 | Actg1        | actin, gamma, cytoplasmic 1                                               | ENSMUSG00000062825 |
| P68368 | Tuba4a  | 191734 | Lyz2         | lysozyme 2                                                                | ENSMUSG00000069516 |
| P68368 | Tuba4a  | 182053 | Tuba1c       | tubulin, alpha 1C                                                         | ENSMUSG00000043091 |
| P68368 | Tuba4a  | 190248 | Kcna1        | potassium voltage-gated channel, shaker-related subfam                    | ENSMUSG00000047976 |
| P68368 | Tuba4a  | 211468 | Cnp          | 2',3'-cyclic nucleotide 3' phosphodiesterase                              | ENSMUSG00000006782 |
| P68368 | Tuba4a  | 204179 | Ywhag        | tyrosine 3-monoxygenase/tryptophan 5-monoxygenase                         | ENSMUSG00000051391 |
| P68368 | Tuba4a  | 163852 | Calm1        | calmodulin 1                                                              | ENSMUSG00000001175 |
| P68368 | Tuba4a  | 162948 | Lgi1         | leucine-rich repeat LGI family, member 1                                  | ENSMUSG00000067242 |
| P68368 | Tuba4a  | 135538 | Syn1         | synapsin I                                                                | ENSMUSG00000037217 |
| P68368 | Tuba4a  | 152459 | Gda          | guanine deaminase                                                         | ENSMUSG00000058624 |
| P68368 | Tuba4a  | 144350 | Tubb2c       | tubulin, beta 2C                                                          | ENSMUSG00000036752 |
| P68368 | Tuba4a  | 159551 | Dnm1         | dynamamin 1                                                               | ENSMUSG00000026825 |
| P68368 | Tuba4a  | 185044 | Kcna2        | potassium voltage-gated channel, shaker-related subfam                    | ENSMUSG00000040724 |
| P68368 | Tuba4a  | 133249 | Adam22       | a disintegrin and metallopeptidase domain 22                              | ENSMUSG00000004537 |
| P68368 | Tuba4a  | 206719 | Kcnab2       | potassium voltage-gated channel, shaker-related subfam                    | ENSMUSG00000028931 |
| P68368 | Tuba4a  | 193317 | Dlq4         | discs, large homolog 4 (Drosophila)                                       | ENSMUSG00000020886 |
| P68368 | Tuba4a  | 144904 | Grin1        | glutamate receptor, ionotropic, NMDA1 (zeta 1)                            | ENSMUSG00000026959 |
| Q921G8 | Tubgcp2 | 161623 | Stxbp1       | syntaxin binding protein 1                                                | ENSMUSG00000026797 |
| Q921G8 | Tubgcp2 | 154521 | Tnk2         | tyrosine kinase, non-receptor, 2                                          | ENSMUSG00000022791 |
| Q921G8 | Tubgcp2 | 130893 | Klc2         | kinesin light chain 2                                                     | ENSMUSG00000024862 |
| Q921G8 | Tubgcp2 | 186957 | Eef1a1       | eukaryotic translation elongation factor 1 alpha 1                        | ENSMUSG00000037742 |
| Q921G8 | Tubgcp2 | 168772 | Kif5c        | kinesin family member 5C                                                  | ENSMUSG00000026764 |
| Q921G8 | Tubgcp2 | 159551 | Dnm1         | dynamamin 1                                                               | ENSMUSG00000026825 |
| Q921G8 | Tubgcp2 | 133375 | Tubgcp3      | tubulin, gamma complex associated protein 3                               | ENSMUSG00000000759 |
| Q921G8 | Tubgcp2 | 173074 | Actr1a       | ARP1 actin-related protein 1 homolog A, centractin alpha                  | ENSMUSG00000025228 |
| Q921G8 | Tubgcp2 | 153613 | Hspa8        | heat shock protein 8                                                      | ENSMUSG00000015656 |
| Q921G8 | Tubgcp2 | 211869 | Tubg1        | tubulin, gamma 1                                                          | ENSMUSG00000035198 |
| Q921G8 | Tubgcp2 | 137748 | Kcnma1       | potassium large conductance calcium-activated channel, s                  | ENSMUSG00000063142 |
| Q921G8 | Tubgcp2 | 191571 | Khdrbs1      | KH domain containing, RNA binding, signal transduction a                  | ENSMUSG00000028790 |
| Q921G8 | Tubgcp2 | 132410 | Pik3c3       | phosphoinositide-3-kinase, class 3                                        | ENSMUSG00000033628 |
| Q921G8 | Tubgcp2 | 156172 | Atp1a3       | ATPase, Na <sup>+</sup> /K <sup>+</sup> transporting, alpha 3 polypeptide | ENSMUSG00000040907 |
| Q921G8 | Tubgcp2 | 205352 | Atp1a2       | ATPase, Na <sup>+</sup> /K <sup>+</sup> transporting, alpha 2 polypeptide | ENSMUSG0000007097  |
| Q921G8 | Tubgcp2 | 186932 | A830010M20R1 | RIKEN cDNA A830010M20 gene                                                | ENSMUSG00000044060 |
| Q921G8 | Tubgcp2 | 144990 | Actr1b       | ARP1 actin-related protein 1 homolog B, centractin beta (                 | ENSMUSG00000037351 |
| Q921G8 | Tubgcp2 | 195461 | Pik3r4       | phosphatidylinositol 3 kinase, regulatory subunit, polypep                | ENSMUSG00000032571 |
| Q921G8 | Tubgcp2 | 179812 | Atp1a1       | ATPase, Na <sup>+</sup> /K <sup>+</sup> transporting, alpha 1 polypeptide | ENSMUSG00000033161 |
| Q921G8 | Tubgcp2 | 201853 | Tubgcp4      | tubulin, gamma complex associated protein 4                               | ENSMUSG00000027263 |
| Q921G8 | Tubgcp2 | 186141 | Ampd2        | adenosine monophosphate deaminase 2                                       | ENSMUSG00000027889 |
| Q921G8 | Tubgcp2 | 51668  | TUBGCP3      | tubulin, gamma complex associated protein 3                               | ENSG00000126216    |
| Q921G8 | Tubgcp2 | 51267  | TUBG1        | tubulin, gamma 1                                                          | ENSG00000131462    |
| Q921G8 | Tubgcp2 | 69689  | MZT2B        | mitotic spindle organizing protein 2B                                     | ENSG00000152082    |
| Q921G8 | Tubgcp2 | 93655  | TUBGCP2      | tubulin, gamma complex associated protein 2                               | ENSG00000130640    |
| P26369 | U2af2   | 156709 | Clk1         | CDC-like kinase 1                                                         | ENSMUSG00000026034 |

|        |         |        |           |                                                                                                 |                     |
|--------|---------|--------|-----------|-------------------------------------------------------------------------------------------------|---------------------|
| Q99NB8 | Ubqln4  | 187207 | Tcfcp211  | transcription factor CP2-like 1                                                                 | ENSMUSG00000026380  |
| Q99NB8 | Ubqln4  | 637438 | UBB       | ubiquitin B                                                                                     | ENSBTAG0000017246   |
| O70481 | Ubr1    | 199949 | Sos1      | son of sevenless homolog 1 (Drosophila)                                                         | ENSMUSG00000024241  |
| O70481 | Ubr1    | 165283 | Use1      | unconventional SNARE in the ER 1 homolog (S. cerevisiae)                                        | ENSMUSG00000002395  |
| Q8BL48 | Unk     | 155851 | Arhgef1   | Rho guanine nucleotide exchange factor (GEF) 1                                                  | ENSMUSG000000040940 |
| Q9CR68 | Uqcrrf1 | 30077  | SNCA      | synuclein, alpha (non A4 component of amyloid precursor protein)                                | ENSG00000145335     |
| Q9ES64 | Ush1c   | 162009 | Pcdh15    | protocadherin 15                                                                                | ENSMUSG00000052613  |
| Q9ES64 | Ush1c   | 154608 | Cdh23     | cadherin 23 (otocadherin)                                                                       | ENSMUSG00000012819  |
| Q9ES64 | Ush1c   | 200041 | Myo7a     | myosin VIIA                                                                                     | ENSMUSG00000030761  |
| Q9ES64 | Ush1c   | 191181 | Shbg      | sex hormone binding globulin                                                                    | ENSMUSG00000005202  |
| O88623 | Usp2    | 13236  | NEDD4     | neural precursor cell expressed, developmentally down-regulated                                 | ENSG00000069869     |
| O88623 | Usp2    | 183743 | Nedd4     | neural precursor cell expressed, developmentally down-regulated                                 | ENSMUSG00000032216  |
| P35123 | Usp4    | 40102  | TRAF6     | TNF receptor-associated factor 6                                                                | ENSG00000175104     |
| P35123 | Usp4    | 193222 | Traf6     | TNF receptor-associated factor 6                                                                | ENSMUSG00000027164  |
| P70460 | Vasp    | 141341 | Apbb1ip   | amyloid beta (A4) precursor protein-binding, family B, member 1                                 | ENSMUSG00000026786  |
| P70460 | Vasp    | 146219 | Pfn2      | profilin 2                                                                                      | ENSMUSG00000027805  |
| P70460 | Vasp    | 140703 | Diap1     | diaphanous homolog 1 (Drosophila)                                                               | ENSMUSG00000024456  |
| P27870 | Vav1    | 68262  | GRB2      | growth factor receptor-bound protein 2                                                          | ENSG00000177885     |
| P27870 | Vav1    | 214339 | Grb2      | growth factor receptor bound protein 2                                                          | ENSMUSG00000059923  |
| P27870 | Vav1    | 195821 | Ptpnc     | protein tyrosine phosphatase, receptor type, C                                                  | ENSMUSG00000026395  |
| P27870 | Vav1    | 199949 | Sos1      | son of sevenless homolog 1 (Drosophila)                                                         | ENSMUSG00000024241  |
| P27870 | Vav1    | 170464 | Rasa1     | RAS p21 protein activator 1                                                                     | ENSMUSG00000021549  |
| P27870 | Vav1    | 191117 | Lck       | lymphocyte protein tyrosine kinase                                                              | ENSMUSG00000000409  |
| P27870 | Vav1    | 152740 | Haus7     | HAUS augmin-like complex, subunit 7                                                             | ENSMUSG00000031371  |
| P27870 | Vav1    | 129304 | Plp2      | proteolipid protein 2                                                                           | ENSMUSG00000031146  |
| P27870 | Vav1    | 158280 | Hnrnpk    | heterogeneous nuclear ribonucleoprotein K                                                       | ENSMUSG00000021546  |
| P27870 | Vav1    | 144629 | Fyn       | Fyn proto-oncogene                                                                              | ENSMUSG00000019843  |
| P27870 | Vav1    | 161461 | Lcp2      | lymphocyte cytosolic protein 2                                                                  | ENSMUSG00000002699  |
| P27870 | Vav1    | 136196 | Prkcc     | protein kinase C, theta                                                                         | ENSMUSG00000026778  |
| P27870 | Vav1    | 165705 | Cblb      | Casitas B-lineage lymphoma b                                                                    | ENSMUSG00000022637  |
| P27870 | Vav1    | 178868 | Pik3r1    | phosphatidylinositol 3-kinase, regulatory subunit, polypeptide chain gamma                      | ENSMUSG00000041417  |
| P27870 | Vav1    | 8115   | RAC1      | ras-related C3 botulinum toxin substrate 1 (rho family, small GTP-binding protein)              | ENSG00000136238     |
| P27870 | Vav1    | 155337 | Sh3bp2    | SH3-domain binding protein 2                                                                    | ENSMUSG000000054520 |
| P27870 | Vav1    | 211273 | Src       | Rous sarcoma oncogene                                                                           | ENSMUSG00000027646  |
| P27870 | Vav1    | 152695 | Sykb      | spleen tyrosine kinase                                                                          | ENSMUSG00000021457  |
| P27870 | Vav1    | 155970 | Cbl       | Casitas B-lineage lymphoma                                                                      | ENSMUSG00000033432  |
| P27870 | Vav1    | 175763 | Tal1      | T-cell acute lymphocytic leukemia 1                                                             | ENSMUSG00000028717  |
| P27870 | Vav1    | 187635 | Ptpn6     | protein tyrosine phosphatase, non-receptor type 6                                               | ENSMUSG00000004266  |
| P20152 | Vim     | 199974 | Pak1      | p21 protein (Cdc42/Rac)-activated kinase 1                                                      | ENSMUSG00000030774  |
| P20152 | Vim     | 59899  | DSP       | desmoplakin                                                                                     | ENSG00000096696     |
| P20152 | Vim     | 35299  | KRT18     | keratin 18                                                                                      | ENSG00000111057     |
| P20152 | Vim     | 130873 | Ppl       | periaklin                                                                                       | ENSMUSG00000039457  |
| P20152 | Vim     | 200741 | Arrb1     | arrestin, beta 1                                                                                | ENSMUSG00000018909  |
| P20152 | Vim     | 201164 | Prkce     | protein kinase C, epsilon                                                                       | ENSMUSG00000045038  |
| P20152 | Vim     | 146193 | Tsga10    | testis specific 10                                                                              | ENSMUSG000000060771 |
| P20152 | Vim     | 129229 | Cftr      | cystic fibrosis transmembrane conductance regulator homolog                                     | ENSMUSG00000041301  |
| Q8R307 | Vps18   | 206436 | Vps16     | vacuolar protein sorting 16 (yeast)                                                             | ENSMUSG00000027411  |
| Q8R307 | Vps18   | 13870  | C14orf133 | chromosome 14 open reading frame 133                                                            | ENSG00000151445     |
| Q8R307 | Vps18   | 30774  | VPS33B    | vacuolar protein sorting 33 homolog B (yeast)                                                   | ENSG00000184056     |
| Q62481 | Vps72   | 187207 | Tcfcp211  | transcription factor CP2-like 1                                                                 | ENSMUSG00000026380  |
| Q8CI28 | Vwf     | 185526 | Mfap5     | microfibrillar associated protein 5                                                             | ENSMUSG00000030116  |
| Q8CGF6 | Wdr47   | 156674 | Tcf4      | transcription factor 4                                                                          | ENSMUSG00000053477  |
| Q8CGF6 | Wdr47   | 205243 | Ctnnb1    | catenin (cadherin associated protein), beta 1                                                   | ENSMUSG00000006932  |
| Q8CGF6 | Wdr47   | 134833 | Tnik      | TRAF2 and NCK interacting kinase                                                                | ENSMUSG00000027692  |
| Q8CGF6 | Wdr47   | 180861 | Zc3h13    | zinc finger CCH type containing 13                                                              | ENSMUSG00000022000  |
| Q8CGF6 | Wdr47   | 186169 | Zfp326    | zinc finger protein 326                                                                         | ENSMUSG00000029290  |
| Q8CGF6 | Wdr47   | 139346 | Mllt10    | myeloid/lymphoid or mixed-lineage leukemia (trithorax homolog)                                  | ENSMUSG00000026743  |
| Q8CGF6 | Wdr47   | 201862 | Smarcc1   | SWI/SNF related, matrix associated, actin dependent regulator of chromatin subfamily 1 member C | ENSMUSG00000032481  |
| Q8CGF6 | Wdr47   | 267922 | Smarcd2   | SWI/SNF related, matrix associated, actin dependent regulator of chromatin subfamily 2 member D | ENSMUSG00000078619  |
| Q8CGF6 | Wdr47   | 181503 | Flii      | flightless I homolog (Drosophila)                                                               | ENSMUSG00000002812  |
| Q8CGF6 | Wdr47   | 143983 | Trim28    | tripartite motif-containing 28                                                                  | ENSMUSG00000005566  |
| Q8CGF6 | Wdr47   | 129915 | Rbm14     | RNA binding motif protein 14                                                                    | ENSMUSG00000006456  |
| Q8CGF6 | Wdr47   | 196765 | Mybbp1a   | MYB binding protein (P160) 1a                                                                   | ENSMUSG00000040463  |
| Q8CGF6 | Wdr47   | 137755 | Wtap      | Wilms' tumour 1-associating protein                                                             | ENSMUSG00000060475  |
| Q8CGF6 | Wdr47   | 135895 | Ubr5      | ubiquitin protein ligase E3 component n-recognin 5                                              | ENSMUSG000000037487 |
| Q8CGF6 | Wdr47   | 175749 | Dot1l     | DOT1-like, histone H3 methyltransferase (S. cerevisiae)                                         | ENSMUSG00000061589  |
| Q8CGF6 | Wdr47   | 169383 | Rif1      | Rap1 interacting factor 1 homolog (yeast)                                                       | ENSMUSG00000036202  |
| Q8CGF6 | Wdr47   | 197552 | Smarcc2   | SWI/SNF related, matrix associated, actin dependent regulator of chromatin subfamily 2 member C | ENSMUSG00000025369  |
| Q8CGF6 | Wdr47   | 207801 | Atad3a    | ATPase family, AAA domain containing 3A                                                         | ENSMUSG00000029036  |
| Q8CGF6 | Wdr47   | 130805 | Rbm28     | RNA binding motif protein 28                                                                    | ENSMUSG000000029701 |
| Q8CGF6 | Wdr47   | 176882 | Chd1l     | chromodomain helicase DNA binding protein 1-like                                                | ENSMUSG00000028089  |
| Q8CGF6 | Wdr47   | 140748 | Carm1     | coactivator-associated arginine methyltransferase 1                                             | ENSMUSG00000032185  |
| Q8CGF6 | Wdr47   | 195347 | Arid1a    | AT rich interactive domain 1A (SWI-like)                                                        | ENSMUSG00000007880  |
| Q8CGF6 | Wdr47   | 171022 | Smarca5   | SWI/SNF related, matrix associated, actin dependent regulator of chromatin subfamily 5 member A | ENSMUSG00000031715  |
| Q8CGF6 | Wdr47   | 177837 | Tcf7l2    | transcription factor 7-like 2, T-cell specific, HMG-box                                         | ENSMUSG000000024985 |
| Q8BH57 | Wdr48   | 200597 | Ywhae     | tyrosine 3-monooxygenase/tryptophan 5-monooxygenase activator protein 1                         | ENSMUSG00000020849  |
| P56695 | Wfs1    | 208404 | Smurf1    | SMAD specific E3 ubiquitin protein ligase 1                                                     | ENSMUSG00000038780  |
| Q8K117 | Wipf1   | 193200 | Nck1      | non-catalytic region of tyrosine kinase adaptor protein 1                                       | ENSMUSG000000032475 |
| Q8K117 | Wipf1   | 212876 | Cttn      | cortactin                                                                                       | ENSMUSG00000031078  |
| Q8K117 | Wipf1   | 133881 | Pik3cq    | phosphoinositide-3-kinase, catalytic, gamma polypeptide                                         | ENSMUSG00000020573  |
| Q8K117 | Wipf1   | 130090 | Was       | Wiskott-Aldrich syndrome homolog (human)                                                        | ENSMUSG00000031165  |
| Q8K117 | Wipf1   | 62310  | CTTN      | cortactin                                                                                       | ENSG00000085733     |
| Q8K117 | Wipf1   | 152695 | Sykb      | spleen tyrosine kinase                                                                          | ENSMUSG000000021457 |
| Q8K117 | Wipf1   | 196509 | Irf8      | interferon regulatory factor 8                                                                  | ENSMUSG000000041515 |
| Q80UE6 | Wnk4    | 147450 | Kcnj1     | potassium inwardly-rectifying channel, subfamily J, member 1                                    | ENSMUSG000000041248 |
| Q80UE6 | Wnk4    | 192929 | Cldn7     | claudin 7                                                                                       | ENSMUSG00000018569  |
| Q80UE6 | Wnk4    | 175590 | Stk39     | serine/threonine kinase 39, STE20/SPS1 homolog (yeast)                                          | ENSMUSG00000027030  |
| Q80UE6 | Wnk4    | 32527  | SLC12A3   | solute carrier family 12 (sodium/chloride transporters), member 3                               | ENSG00000070915     |
| P04426 | Wnt1    | 209670 | Kl        | klotho                                                                                          | ENSMUSG00000058488  |

|        |         |        |              |                                                                |                     |
|--------|---------|--------|--------------|----------------------------------------------------------------|---------------------|
| P04426 | Wnt1    | 201449 | Wls          | wntless homolog (Drosophila)                                   | ENSMUSG00000028173  |
| P04426 | Wnt1    | 213058 | Wnt3         | wingless-related MMTV integration site 3                       | ENSMUSG00000000125  |
| P04426 | Wnt1    | 141666 | Wnt5a        | wingless-related MMTV integration site 5A                      | ENSMUSG00000021994  |
| P04426 | Wnt1    | 128188 | Fzd8         | frizzled homolog 8 (Drosophila)                                | ENSMUSG00000036904  |
| P04426 | Wnt1    | 194033 | Lrp6         | low density lipoprotein receptor-related protein 6             | ENSMUSG00000030201  |
| P04426 | Wnt1    | 132454 | Fzd1         | frizzled homolog 1 (Drosophila)                                | ENSMUSG00000044674  |
| P04426 | Wnt1    | 130301 | Porcn        | porcupine homolog (Drosophila)                                 | ENSMUSG00000031169  |
| P04426 | Wnt1    | 194079 | Ryk          | receptor-like tyrosine kinase                                  | ENSMUSG00000032547  |
| P04426 | Wnt1    | 158189 | Dkk1         | dickkopf homolog 1 (Xenopus laevis)                            | ENSMUSG00000024868  |
| P04426 | Wnt1    | 128306 | Lrp5         | low density lipoprotein receptor-related protein 5             | ENSMUSG00000024913  |
| Q91XU0 | Wrrnip1 | 147033 | Wrn          | Werner syndrome homolog (human)                                | ENSMUSG00000031583  |
| Q91WL8 | Wwox    | 73479  | MAPK8        | mitogen-activated protein kinase 8                             | ENSG00000107643     |
| Q91WL8 | Wwox    | 191036 | Trp53        | transformation related protein 53                              | ENSMUSG00000059552  |
| Q91WL8 | Wwox    | 175763 | Tal1         | T-cell acute lymphocytic leukemia 1                            | ENSMUSG00000028717  |
| Q8BZZ3 | Wwp1    | 180986 | Hoxd12       | homeobox D12                                                   | ENSMUSG00000001823  |
| Q60989 | Xiap    | 149571 | Notch1       | Notch gene homolog 1 (Drosophila)                              | ENSMUSG00000026923  |
| Q60989 | Xiap    | 62263  | DIABLO       | diablo, IAP-binding mitochondrial protein                      | ENSG00000184047     |
| Q60989 | Xiap    | 185903 | Hccs         | holocytochrome c synthetase                                    | ENSMUSG00000031352  |
| Q60989 | Xiap    | 154747 | Irak1        | interleukin-1 receptor-associated kinase 1                     | ENSMUSG00000031392  |
| Q60989 | Xiap    | 199693 | Diablo       | diablo homolog (Drosophila)                                    | ENSMUSG00000029433  |
| Q60989 | Xiap    | 57753  | HTRA2        | HtrA serine peptidase 2                                        | ENSG00000115317     |
| Q60989 | Xiap    | 146050 | Tgfb1        | transforming growth factor, beta receptor I                    | ENSMUSG00000007613  |
| Q60989 | Xiap    | 158878 | Pten         | phosphatase and tensin homolog                                 | ENSMUSG00000013663  |
| Q60989 | Xiap    | 133552 | Map3k2       | mitogen-activated protein kinase kinase kinase 2               | ENSMUSG00000024383  |
| Q60989 | Xiap    | 159586 | Htra2        | HtrA serine peptidase 2                                        | ENSMUSG000000068329 |
| Q60596 | Xrcc1   | 187207 | Tcfcp2l1     | transcription factor CP2-like 1                                | ENSMUSG00000026380  |
| Q60596 | Xrcc1   | 178408 | Pou5f1       | POU domain, class 5, transcription factor 1                    | ENSMUSG00000024406  |
| Q9DBR1 | Xrn2    | 18226  | PRKAA1       | protein kinase, AMP-activated, alpha 1 catalytic subunit       | ENSG00000132356     |
| P62960 | Ybx1    | 160840 | Npm1         | nucleophosmin 1                                                | ENSMUSG00000057113  |
| P62960 | Ybx1    | 181902 | Ebna1b1p2    | EBNA1 binding protein 2                                        | ENSMUSG00000028729  |
| P62960 | Ybx1    | 147779 | Dhx36        | DEAH (Asp-Glu-Ala-His) box polypeptide 36                      | ENSMUSG00000027770  |
| P62960 | Ybx1    | 193395 | Csda         | cold shock domain protein A                                    | ENSMUSG00000030189  |
| P62960 | Ybx1    | 183109 | Mov10        | Moloney leukemia virus 10                                      | ENSMUSG00000002227  |
| P62960 | Ybx1    | 195575 | Lin28a       | lin-28 homolog A (C. elegans)                                  | ENSMUSG00000050966  |
| P62960 | Ybx1    | 177350 | Ssb          | Siogren syndrome antigen B                                     | ENSMUSG00000068882  |
| P62960 | Ybx1    | 148994 | Lin28b       | lin-28 homolog B (C. elegans)                                  | ENSMUSG00000063804  |
| P62960 | Ybx1    | 209747 | Igf2bp1      | insulin-like growth factor 2 mRNA binding protein 1            | ENSMUSG00000013415  |
| P62960 | Ybx1    | 172864 | Zcchc11      | zinc finger, CCHC domain containing 11                         | ENSMUSG00000034610  |
| P62960 | Ybx1    | 157719 | Ddx21        | DEAD (Asp-Glu-Ala-Asp) box polypeptide 21                      | ENSMUSG00000020075  |
| P62960 | Ybx1    | 135334 | Pabpc1       | poly(A) binding protein, cytoplasmic 1                         | ENSMUSG00000022283  |
| P62960 | Ybx1    | 185079 | Pabpc4       | poly(A) binding protein, cytoplasmic 4                         | ENSMUSG00000011257  |
| P62960 | Ybx1    | 101151 | MOV10        | Mov10, Moloney leukemia virus 10, homolog (mouse)              | ENSG00000155363     |
| P62960 | Ybx1    | 86774  | MRPL43       | mitochondrial ribosomal protein L43                            | ENSG00000055950     |
| P62960 | Ybx1    | 24767  | MRPS35       | mitochondrial ribosomal protein S35                            | ENSG00000061794     |
| P62960 | Ybx1    | 14467  | NOP2         | NOP2 nucleolar protein homolog (yeast)                         | ENSG00000111641     |
| P62960 | Ybx1    | 103603 | MRPL24       | mitochondrial ribosomal protein L24                            | ENSG00000143314     |
| P62960 | Ybx1    | 42070  | NOP56        | NOP56 ribonucleoprotein homolog (yeast)                        | ENSG00000101361     |
| P62960 | Ybx1    | 66351  | MRPL47       | mitochondrial ribosomal protein L47                            | ENSG00000113652     |
| P62960 | Ybx1    | 17070  | CLPX         | ClpX caseinolytic peptidase X homolog (E. coli)                | ENSG00000166855     |
| P62960 | Ybx1    | 26545  | YARS2        | tyrosyl-tRNA synthetase 2, mitochondrial                       | ENSG00000139131     |
| P62960 | Ybx1    | 14949  | RSL1D1       | ribosomal L1 domain containing 1                               | ENSG00000171490     |
| P62960 | Ybx1    | 78852  | NOP58        | NOP58 ribonucleoprotein homolog (yeast)                        | ENSG00000055044     |
| P62960 | Ybx1    | 231947 | HNRNPUL2     | heterogeneous nuclear ribonucleoprotein U-like 2               | ENSG00000214753     |
| P62960 | Ybx1    | 30847  | PABPC1       | poly(A) binding protein, cytoplasmic 1                         | ENSG00000070756     |
| P62960 | Ybx1    | 60841  | HNRNPAB      | heterogeneous nuclear ribonucleoprotein A/B                    | ENSG00000119745     |
| P62960 | Ybx1    | 68708  | TRA2B        | transformer 2 beta homolog (Drosophila)                        | ENSG00000136527     |
| P62960 | Ybx1    | 76689  | FAM120A      | family with sequence similarity 120A                           | ENSG00000048828     |
| P62960 | Ybx1    | 105280 | DHX9         | DEAH (Asp-Glu-Ala-His) box polypeptide 9                       | ENSG00000135829     |
| P62960 | Ybx1    | 45275  | MRPS26       | mitochondrial ribosomal protein S26                            | ENSG00000125901     |
| P62960 | Ybx1    | 93845  | HNRNPR       | heterogeneous nuclear ribonucleoprotein R                      | ENSG00000125944     |
| P62960 | Ybx1    | 74582  | SSB          | Siogren syndrome antigen B (autoantigen La)                    | ENSG00000138385     |
| P62960 | Ybx1    | 47535  | MATR3        | matrin 3                                                       | ENSG00000015479     |
| P62960 | Ybx1    | 58802  | MRPS22       | mitochondrial ribosomal protein S22                            | ENSG00000175110     |
| P62960 | Ybx1    | 74966  | RALY         | RNA binding protein, autoantigenic (hnRNP-associated with      | ENSG00000125970     |
| P62960 | Ybx1    | 34614  | LARP7        | La ribonucleoprotein domain family, member 7                   | ENSG00000174720     |
| P62960 | Ybx1    | 96711  | PABPC4       | poly(A) binding protein, cytoplasmic 4 (inducible form)        | ENSG00000090621     |
| P62960 | Ybx1    | 73948  | HNRNPK       | heterogeneous nuclear ribonucleoprotein K                      | ENSG00000165119     |
| P62960 | Ybx1    | 48642  | MRPL16       | mitochondrial ribosomal protein L16                            | ENSG00000166902     |
| P62960 | Ybx1    | 31963  | DHX30        | DEAH (Asp-Glu-Ala-His) box polypeptide 30                      | ENSG00000132153     |
| P62960 | Ybx1    | 9268   | MRPS34       | mitochondrial ribosomal protein S34                            | ENSG00000074071     |
| P62960 | Ybx1    | 26969  | HNRPDL       | heterogeneous nuclear ribonucleoprotein D-like                 | ENSG00000152795     |
| P62960 | Ybx1    | 64774  | DDX5         | DEAD (Asp-Glu-Ala-Asp) box polypeptide 5                       | ENSG00000108654     |
| P62960 | Ybx1    | 50843  | FBL          | fibrillarin                                                    | ENSG00000105202     |
| P62960 | Ybx1    | 84543  | RRP12        | ribosomal RNA processing 12 homolog (S. cerevisiae)            | ENSG00000052749     |
| P62960 | Ybx1    | 100201 | ZNF326       | zinc finger protein 326                                        | ENSG00000162664     |
| P62960 | Ybx1    | 71348  | HNRNPF       | heterogeneous nuclear ribonucleoprotein F                      | ENSG00000169813     |
| P62960 | Ybx1    | 92073  | DKC1         | dyskeratosis congenita 1, dyskerin                             | ENSG00000130826     |
| P62960 | Ybx1    | 72582  | SLC25A10;MRP | solute carrier family 25 (mitochondrial carrier; dicarboxylate | ENSG00000183048     |
| P62960 | Ybx1    | 68185  | MRPS7        | mitochondrial ribosomal protein S7                             | ENSG00000125445     |
| P62960 | Ybx1    | 75837  | HNRNPA3      | heterogeneous nuclear ribonucleoprotein A3                     | ENSG00000170144     |
| P62960 | Ybx1    | 98576  | MRPL18       | mitochondrial ribosomal protein L18                            | ENSG00000112110     |
| P62960 | Ybx1    | 14600  | ZFR          | zinc finger RNA binding protein                                | ENSG00000056097     |
| P62960 | Ybx1    | 37948  | DDX28        | DEAD (Asp-Glu-Ala-Asp) box polypeptide 28                      | ENSG00000182810     |
| P62960 | Ybx1    | 87732  | RBMX         | RNA binding motif protein, X-linked                            | ENSG00000147274     |
| P62960 | Ybx1    | 94027  | SYNCRIP      | synaptotagmin binding, cytoplasmic RNA interacting prote       | ENSG00000135316     |
| P62960 | Ybx1    | 107800 | HNRNPU       | heterogeneous nuclear ribonucleoprotein U (scaffold attac      | ENSG00000153187     |
| P62960 | Ybx1    | 59626  | PTCD3        | Pentatricopeptide repeat domain 3                              | ENSG00000132300     |
| P62960 | Ybx1    | 29914  | POP1         | processing of precursor 1, ribonuclease P/MRP subunit (S       | ENSG00000104356     |
| P62960 | Ybx1    | 54950  | LARP1        | La ribonucleoprotein domain family, member 1                   | ENSG00000155506     |



|        |        |        |          |                                                           |                     |
|--------|--------|--------|----------|-----------------------------------------------------------|---------------------|
| P62960 | Ybx1   | 9675   | IGF2BP3  | insulin-like growth factor 2 mRNA binding protein 3       | ENSG00000136231     |
| P62960 | Ybx1   | 76283  | DDX21    | DEAD (Asp-Glu-Ala-Asp) box polypeptide 21                 | ENSG00000165732     |
| P62960 | Ybx1   | 27975  | ILF3     | interleukin enhancer binding factor 3, 90kDa              | ENSG00000129351     |
| P62960 | Ybx1   | 200597 | Ywhae    | tyrosine 3-monooxygenase/tryptophan 5-monooxygenase       | ENSMUSG00000020849  |
| P62960 | Ybx1   | 57431  | IGF2BP1  | insulin-like growth factor 2 mRNA binding protein 1       | ENSG00000159217     |
| P62960 | Ybx1   | 87885  | TRUB2    | TruB pseudouridine (psi) synthase homolog 2 (E. coli)     | ENSG00000167112     |
| P62960 | Ybx1   | 76419  | MRPS18B  | mitochondrial ribosomal protein S18B                      | ENSG00000204568     |
| P62960 | Ybx1   | 46207  | HNRNPA0  | heterogeneous nuclear ribonucleoprotein A0                | ENSG00000177733     |
| Q9CX30 | Yif1b  | 199250 | Rgs16    | regulator of G-protein signaling 16                       | ENSMUSG00000026475  |
| Q9CX30 | Yif1b  | 194715 | Wasf2    | WAS protein family, member 2                              | ENSMUSG00000028868  |
| Q80X44 | Zbtb24 | 144115 | Ewsr1    | Ewing sarcoma breakpoint region 1                         | ENSMUSG00000009079  |
| Q3U133 | Zfp746 | 136351 | Park2    | Parkinson disease (autosomal recessive, juvenile) 2, park | ENSMUSG00000023826  |
| Q3U133 | Zfp746 | 163551 | Pparqc1a | peroxisome proliferative activated receptor, gamma, coact | ENSMUSG00000029167  |
| Q8K327 | Zfp828 | 187207 | Tcfcp2l1 | transcription factor CP2-like 1                           | ENSMUSG00000026380  |
| Q35615 | Zfpm1  | 129965 | Gata1    | GATA binding protein 1                                    | ENSMUSG00000031162  |
| Q35615 | Zfpm1  | 179829 | Rb1      | retinoblastoma 1                                          | ENSMUSG00000022105  |
| Q35615 | Zfpm1  | 197705 | E2f2     | E2F transcription factor 2                                | ENSMUSG00000018983  |
| Q35615 | Zfpm1  | 175763 | Tal1     | T-cell acute lymphocytic leukemia 1                       | ENSMUSG00000028717  |
| Q35615 | Zfpm1  | 211193 | Ctbp2    | C-terminal binding protein 2                              | ENSMUSG00000030970  |
| Q35615 | Zfpm1  | 142016 | Mta2     | metastasis-associated gene family, member 2               | ENSMUSG00000021646  |
| Q35615 | Zfpm1  | 128600 | Rbbp8    | retinoblastoma binding protein 8                          | ENSMUSG00000041238  |
| Q35615 | Zfpm1  | 143980 | Hdac2    | histone deacetylase 2                                     | ENSMUSG00000019777  |
| Q35615 | Zfpm1  | 198084 | Kdm1a    | lysine (K)-specific demethylase 1A                        | ENSMUSG00000036940  |
| Q35615 | Zfpm1  | 175870 | Mta1     | metastasis associated 1                                   | ENSMUSG00000021144  |
| Q35615 | Zfpm1  | 183758 | Rbbp7    | retinoblastoma binding protein 7                          | ENSMUSG00000031353  |
| Q35615 | Zfpm1  | 152845 | Ctbp1    | C-terminal binding protein 1                              | ENSMUSG00000037373  |
| Q35615 | Zfpm1  | 191058 | Hdac1    | histone deacetylase 1                                     | ENSMUSG00000028800  |
| Q35615 | Zfpm1  | 153460 | Tacc3    | transforming, acidic coiled-coil containing protein 3     | ENSMUSG00000037313  |
| Q8C0C0 | Zhx2   | 211315 | Dock1    | dedicator of cytokinesis 1                                | ENSMUSG00000058325  |
| Q8C0C0 | Zhx2   | 155648 | Rel      | reticulendotheliosis oncogene                             | ENSMUSG00000020275  |
| A2A791 | Zmym4  | 187207 | Tcfcp2l1 | transcription factor CP2-like 1                           | ENSMUSG00000026380  |
| P20239 | Zp2    | 174668 | Acr      | acrosin prepropeptide                                     | ENSMUSG00000022622  |
| O54692 | Zw10   | 35069  | RINT1    | RAD50 interactor 1                                        | ENSG00000135249     |
| O54692 | Zw10   | 14632  | C19orf25 | chromosome 19 open reading frame 25                       | ENSG00000119559     |
| O54692 | Zw10   | 62630  | KNTC1    | kinetochore associated 1                                  | ENSG00000184445     |
| O54692 | Zw10   | 18211  | ZWILCH   | Zwilch, kinetochore associated, homolog (Drosophila)      | ENSG00000174442     |
| O54692 | Zw10   | 71807  | ZW10     | ZW10, kinetochore associated, homolog (Drosophila)        | ENSG00000086827     |
| O54692 | Zw10   | 42318  | CKAP5    | cytoskeleton associated protein 5                         | ENSG00000175216     |
| O54692 | Zw10   | 18380  | SCFD2    | sec1 family domain containing 2                           | ENSG00000184178     |
| O54692 | Zw10   | 30503  | NBAS     | neuroblastoma amplified sequence                          | ENSG00000151779     |
| Q9CQU5 | Zwint  | 29429  | PRKCSH   | protein kinase C substrate 80K-H                          | ENSG00000130175     |
| Q9CQU5 | Zwint  | 95987  | HSF2     | heat shock transcription factor 2                         | ENSG00000025156     |
| Q9CQU5 | Zwint  | 28915  | SPC24    | SPC24, NDC80 kinetochore complex component, homolog       | ENSG00000161888     |
| Q9CQU5 | Zwint  | 73404  | DSN1     | DSN1, MIND kinetochore complex component, homolog (S      | ENSG00000149636     |
| Q9CQU5 | Zwint  | 33815  | KIFC3    | kinetochore family member C3                              | ENSG00000140859     |
| Q9CQU5 | Zwint  | 40498  | HSF1     | heat shock transcription factor 1                         | ENSG00000185122     |
| Q9CQU5 | Zwint  | 6877   | TACC3    | transforming, acidic coiled-coil containing protein 3     | ENSG00000138110     |
| Q9CQU5 | Zwint  | 87806  | GOLGA2   | golgin A2                                                 | ENSG00000167110     |
| Q9CQU5 | Zwint  | 391    | NDC80    | NDC80 homolog, kinetochore complex component (S. cere     | ENSG00000080986     |
| Q9CQU5 | Zwint  | 76196  | OGT      | O-linked N-acetylglucosamine (GlcNAc) transferase (UDP-   | ENSG00000147162     |
| Q9CQU5 | Zwint  | 81397  | NUP62CL  | nucleoporin 62kDa C-terminal like                         | ENSG00000198088     |
| Q9CQU5 | Zwint  | 51371  | GANAB    | glucosidase, alpha; neutral AB                            | ENSG00000089597     |
| Q9CQU5 | Zwint  | 35513  | EPS15L1  | epidermal growth factor receptor pathway substrate 15-li  | ENSG00000127527     |
| Q9CQU5 | Zwint  | 6485   | CASC5    | cancer susceptibility candidate 5                         | ENSG00000137812     |
| Q9CQU5 | Zwint  | 37408  | THAP11   | THAP domain containing 11                                 | ENSG00000168286     |
| Q9CQU5 | Zwint  | 105359 | EDEM3    | ER degradation enhancer, mannosidase alpha-like 3         | ENSG00000116406     |
| Q9CQU5 | Zwint  | 246910 | NUP62    | nucleoporin 62kDa                                         | ENSG00000213024     |
| Q9CQU5 | Zwint  | 104442 | NUF2     | NUF2, NDC80 kinetochore complex component, homolog        | ENSG00000143228     |
| Q9CQU5 | Zwint  | 98484  | EPS15    | epidermal growth factor receptor pathway substrate 15     | ENSG00000085832     |
| Q6KAQ7 | Zzz3   | 205939 | Tada2a   | transcriptional adaptor 2A                                | ENSMUSG00000018651  |
| Q6KAQ7 | Zzz3   | 143426 | Yeats2   | YEATS domain containing 2                                 | ENSMUSG00000041215  |
| Q6KAQ7 | Zzz3   | 151154 | Wdr5     | WD repeat domain 5                                        | ENSMUSG00000026917  |
| Q6KAQ7 | Zzz3   | 176433 | Tada3    | transcriptional adaptor 3                                 | ENSMUSG00000048930  |
| Q6KAQ7 | Zzz3   | 209697 | Ccdc101  | coiled-coil domain containing 101                         | ENSMUSG00000030714  |
| Q6KAQ7 | Zzz3   | 190822 | Kat2b    | K(lysine) acetyltransferase 2B                            | ENSMUSG00000000708  |
| Q6KAQ7 | Zzz3   | 187799 | Dr1      | down-regulator of transcription 1                         | ENSMUSG00000029265  |
| Q6KAQ7 | Zzz3   | 141131 | Mbip     | MAP3K12 binding inhibitory protein 1                      | ENSMUSG00000021028  |
| Q6KAQ7 | Zzz3   | 208472 | Csrp2bp  | cysteine and glycine-rich protein 2 binding protein       | ENSMUSG00000027425  |
| Q6KAQ7 | Zzz3   | 211539 | Kat2a    | K(lysine) acetyltransferase 2A                            | ENSMUSG00000020918  |
| Q6KAQ7 | Zzz3   | 132631 | Atxn7    | ataxin 7                                                  | ENSMUSG000000021738 |
| Q6KAQ7 | Zzz3   | 134374 | Atxn7l1  | ataxin 7-like 1                                           | ENSMUSG00000020564  |
| Q6KAQ7 | Zzz3   | 212566 | Atxn7l3  | ataxin 7-like 3                                           | ENSMUSG00000059995  |
| Q6KAQ7 | Zzz3   | 210500 | Med1     | mediator complex subunit 1                                | ENSMUSG00000018160  |
| Q6KAQ7 | Zzz3   | 253359 | Med12    | mediator of RNA polymerase II transcription, subunit 12 h | ENSMUSG00000079487  |
| Q6KAQ7 | Zzz3   | 206853 | Med13    | mediator complex subunit 13                               | ENSMUSG00000034297  |
| Q6KAQ7 | Zzz3   | 132282 | Med14    | mediator complex subunit 14                               | ENSMUSG00000064127  |
| Q6KAQ7 | Zzz3   | 139947 | Med15    | mediator complex subunit 15                               | ENSMUSG00000012114  |
| Q6KAQ7 | Zzz3   | 171451 | Med16    | mediator complex subunit 16                               | ENSMUSG00000013833  |
| Q6KAQ7 | Zzz3   | 135069 | Med17    | mediator complex subunit 17                               | ENSMUSG00000031935  |
| Q6KAQ7 | Zzz3   | 194008 | Med18    | mediator of RNA polymerase II transcription, subunit 18 h | ENSMUSG00000066042  |
| Q6KAQ7 | Zzz3   | 198395 | Med21    | mediator complex subunit 21                               | ENSMUSG00000030291  |
| Q6KAQ7 | Zzz3   | 139123 | Med23    | mediator complex subunit 23                               | ENSMUSG00000019984  |
| Q6KAQ7 | Zzz3   | 210636 | Med24    | mediator complex subunit 24                               | ENSMUSG00000017210  |
| Q6KAQ7 | Zzz3   | 168279 | Med26    | mediator complex subunit 26                               | ENSMUSG00000045248  |
| Q6KAQ7 | Zzz3   | 153778 | Med27    | mediator complex subunit 27                               | ENSMUSG00000026799  |
| Q6KAQ7 | Zzz3   | 162461 | Med28    | mediator of RNA polymerase II transcription, subunit 28 h | ENSMUSG00000015804  |
| Q6KAQ7 | Zzz3   | 196398 | Med31    | mediator of RNA polymerase II transcription, subunit 31 h | ENSMUSG00000020801  |
| Q6KAQ7 | Zzz3   | 180055 | Med4     | mediator of RNA polymerase II transcription, subunit 4 h  | ENSMUSG00000022109  |
| Q6KAQ7 | Zzz3   | 154516 | Med6     | mediator of RNA polymerase II transcription, subunit 6 h  | ENSMUSG00000002679  |

|        |      |        |          |                                                          |                     |
|--------|------|--------|----------|----------------------------------------------------------|---------------------|
| Q6KAQ7 | Zzz3 | 181342 | Med8     | mediator of RNA polymerase II transcription, subunit 8 h | ENSMUSG00000006392  |
| Q6KAQ7 | Zzz3 | 191826 | Polr2a   | polymerase (RNA) II (DNA directed) polypeptide A         | ENSMUSG00000005198  |
| Q6KAQ7 | Zzz3 | 174132 | Polr2b   | polymerase (RNA) II (DNA directed) polypeptide B         | ENSMUSG00000029250  |
| Q6KAQ7 | Zzz3 | 209007 | Spata20  | spermatogenesis associated 20                            | ENSMUSG00000020867  |
| Q6KAQ7 | Zzz3 | 207998 | Sptlc3   | serine palmitoyltransferase, long chain base subunit 3   | ENSMUSG00000039092  |
| Q6KAQ7 | Zzz3 | 203046 | Tada1    | transcriptional adaptor 1                                | ENSMUSG00000026563  |
| Q6KAQ7 | Zzz3 | 204983 | Taf10    | TAF10 RNA polymerase II, TATA box binding protein (TBP)  | ENSMUSG000000043866 |
| Q6KAQ7 | Zzz3 | 193751 | Taf12    | TAF12 RNA polymerase II, TATA box binding protein (TBP)  | ENSMUSG00000028899  |
| Q6KAQ7 | Zzz3 | 199943 | Taf5l    | TAF5-like RNA polymerase II, p300/CBP-associated factor  | ENSMUSG00000038697  |
| Q6KAQ7 | Zzz3 | 140953 | Taf6l    | TAF6-like RNA polymerase II, p300/CBP-associated factor  | ENSMUSG0000003680   |
| Q6KAQ7 | Zzz3 | 178346 | Taf9     | TAF9 RNA polymerase II, TATA box binding protein (TBP)   | ENSMUSG00000052293  |
| Q6KAQ7 | Zzz3 | 208186 | Trrap    | transformation/transcription domain-associated protein   | ENSMUSG000000045482 |
| Q6KAQ7 | Zzz3 | 182297 | Usp22    | ubiquitin specific peptidase 22                          | ENSMUSG00000042506  |
| Q6KAQ7 | Zzz3 | 186515 | Atxn7l2  | ataxin 7-like 2                                          | ENSMUSG000000048997 |
| Q6KAQ7 | Zzz3 | 606312 | Med20    | mediator complex subunit 20                              | ENSMUSG00000092558  |
| Q6KAQ7 | Zzz3 | 187207 | Tcfcp2l1 | transcription factor CP2-like 1                          | ENSMUSG00000026380  |

**Table S3. Cellular pathways/processes over-represented within the pathogen response network (P<0.05)**  
**Analysis is shown for three networks - INOH, KEGG and REACTOME**

|                      | Pathway Name                                                                  | Pathway # | Uploaded Pathway Genes # | Genes in InnateDB for this pathway # | Genes Ratio | p-value     |
|----------------------|-------------------------------------------------------------------------------|-----------|--------------------------|--------------------------------------|-------------|-------------|
| <b>INOH Database</b> | 1 JAK-STAT pathway and regulation pathway                                     | 10320     | 132                      | 229                                  | 58%         | 1.12941E-45 |
|                      | 2 VEGF signaling pathway                                                      | 9573      | 86                       | 153                                  | 56%         | 1.93624E-28 |
|                      | 3 HGF signaling pathway                                                       | 9545      | 28                       | 31                                   | 90%         | 4.62645E-18 |
|                      | 4 TGF-beta super family signaling pathway(canonical)                          | 9541      | 48                       | 85                                   | 56%         | 3.53799E-16 |
|                      | 5 Insulin receptor signaling                                                  | 9660      | 41                       | 69                                   | 59%         | 5.63966E-15 |
|                      | 6 AKT-mTOR signaling                                                          | 9721      | 22                       | 29                                   | 76%         | 2.10957E-11 |
|                      | 7 Signaling with Wnt (Canonical)                                              | 9585      | 30                       | 54                                   | 56%         | 3.88786E-10 |
|                      | 8 Integrin signaling pathway                                                  | 9503      | 43                       | 97                                   | 44%         | 4.50978E-10 |
|                      | 9 TNFR1 signaling pathway                                                     | 9856      | 19                       | 28                                   | 68%         | 1.25389E-08 |
|                      | 10 NGF signaling pathway                                                      | 10222     | 15                       | 19                                   | 79%         | 2.39284E-08 |
|                      | 11 IL-1 signaling(through IKK-NFkB cascade)                                   | 10137     | 15                       | 24                                   | 63%         | 2.41193E-06 |
|                      | 12 Toll-like receptor signaling pathway (through LPS, TLR4, MyD88, IRAK, TAK) | 9680      | 15                       | 24                                   | 63%         | 2.41193E-06 |
|                      | 13 Stabilization and accumulation of cytoplasmic beta-catenin                 | 9635      | 13                       | 21                                   | 62%         | 1.52533E-05 |
|                      | 14 IKK-NFkB cascade ( TNFR1 signaling pathway )                               | 10149     | 9                        | 11                                   | 82%         | 1.57352E-05 |
|                      | 15 Toll-like receptor signaling pathway (through JNK cascade)                 | 9514      | 14                       | 24                                   | 58%         | 1.57387E-05 |
|                      | 16 Toll-like receptor signaling pathway (through p38 cascade)                 | 9499      | 14                       | 25                                   | 56%         | 2.84739E-05 |
|                      | 17 IKK activation signaling (through PKC beta and CARMA1:BCL10:MALT1)         | 9646      | 10                       | 14                                   | 71%         | 2.99776E-05 |
|                      | 18 IL-6 signaling pathway                                                     | 10204     | 6                        | 6                                    | 100%        | 7.82359E-05 |
|                      | 19 Heterotrimeric GPCR signaling pathway (through glutamate, G alpha q and    | 10270     | 14                       | 27                                   | 52%         | 8.37097E-05 |
|                      | 20 Fas signaling pathway                                                      | 10228     | 11                       | 18                                   | 61%         | 8.42532E-05 |
|                      | 21 Heterotrimeric GPCR signaling pathway (through Adenosine G alpha s)        | 9618      | 14                       | 28                                   | 50%         | 0.000136269 |
|                      | 22 TGF beta signaling pathway (through TAK1)                                  | 10329     | 11                       | 20                                   | 55%         | 0.000282566 |
|                      | 23 ERK cascade ( Integrin signaling pathway )                                 | 9674      | 5                        | 5                                    | 100%        | 0.000391416 |
|                      | 24 Toll-like receptor signaling pathway (through ECSIT, MEKK1, MKKs, JNK cas  | 9735      | 11                       | 21                                   | 52%         | 0.00047191  |
|                      | 25 Heterotrimeric GPCR signaling pathway (through G alpha s ACs PKA BRaf an   | 9754      | 58                       | 234                                  | 25%         | 0.001150829 |
|                      | 26 Toll-like receptor signaling pathway (through NF-kappaB)                   | 10067     | 7                        | 11                                   | 64%         | 0.001530876 |
|                      | 27 ERK cascade ( JAK-STAT pathway )                                           | 9759      | 5                        | 6                                    | 83%         | 0.001628804 |
|                      | 28 IL-23 signaling pathway(JAK2 TYK2 STAT3 STAT4)                             | 9655      | 5                        | 6                                    | 83%         | 0.001628804 |
|                      | 29 Heterotrimeric GPCR signaling pathway (through G alpha s ACs Epac BRaf a   | 9827      | 55                       | 229                                  | 24%         | 0.002972262 |
|                      | 30 IL-12 signaling pathway                                                    | 9528      | 5                        | 7                                    | 71%         | 0.00432736  |
|                      | 31 Negative regulation of gene expression ( Insulin receptor signaling )      | 10043     | 5                        | 7                                    | 71%         | 0.00432736  |
|                      | 32 B-Raf activation signaling ( GPCR Adenosine A2A receptor signaling pathwa  | 10194     | 6                        | 10                                   | 60%         | 0.004988334 |
|                      | 33 Negative regulation of JAK STAT pathway                                    | 10295     | 4                        | 5                                    | 80%         | 0.006863086 |
|                      | 34 IL-13 signaling pathway(JAK1 TYK2 STAT6) ( IL-13 signaling(JAK1 TYK2 ST    | 9837      | 5                        | 8                                    | 63%         | 0.008876222 |
|                      | 35 P38 cascade ( IL-1 signaling pathway )                                     | 10056     | 6                        | 12                                   | 50%         | 0.014305802 |
|                      | 36 Rap1 activation signaling (through cAMP, PKA, Cbl and C3G)                 | 10267     | 5                        | 9                                    | 56%         | 0.016132761 |
|                      | 37 AKT-GSK3beta signaling                                                     | 9833      | 4                        | 6                                    | 67%         | 0.016156253 |
|                      | 38 IL-10 signaling pathway                                                    | 9829      | 4                        | 6                                    | 67%         | 0.016156253 |
|                      | 39 Heterotrimeric GTP-binding protein coupled receptor signaling pathway (thr | 9794      | 49                       | 221                                  | 22%         | 0.021413313 |
|                      | 40 Beta catenin degradation signaling ( Canonical Wnt signaling pathway Diagr | 9535      | 4                        | 7                                    | 57%         | 0.030138138 |
|                      | 41 Raf activation signaling (through RasGRP)                                  | 9848      | 4                        | 7                                    | 57%         | 0.030138138 |
|                      | 42 Caspase3 activation signaling ( TNFR1 signaling pathway )                  | 10054     | 2                        | 2                                    | 100%        | 0.046762678 |
|                      | 43 Caspase8 activation signaling ( TNFR1 signaling pathway )                  | 9819      | 2                        | 2                                    | 100%        | 0.046762678 |
|                      | 44 Regulation of target gene expression by NF-kB                              | 9696      | 2                        | 2                                    | 100%        | 0.046762678 |
|                      | 45 JNK cascade ( TNFR1 signaling pathway )                                    | 9792      | 4                        | 8                                    | 50%         | 0.048578563 |
|                      | 46 Hedgehog signaling pathway                                                 | 10082     | 8                        | 24                                   | 33%         | 0.052093656 |
|                      | 47 Notch degradation signaling ( Notch signaling pathway Diagram )            | 10019     | 3                        | 5                                    | 60%         | 0.05376897  |
|                      | 48 IFN alpha signaling pathway                                                | 9520      | 5                        | 12                                   | 42%         | 0.054643652 |
| <b>KEGG Database</b> | 1 Pathways in cancer                                                          | 4393      | 162                      | 318                                  | 51%         | 1.46074E-46 |
|                      | 2 Osteoclast differentiation                                                  | 10372     | 74                       | 116                                  | 64%         | 3.0312E-29  |
|                      | 3 Chronic myeloid leukemia                                                    | 777       | 56                       | 72                                   | 78%         | 4.34443E-29 |
|                      | 4 Neurotrophin signaling pathway                                              | 4369      | 74                       | 126                                  | 59%         | 3.89963E-26 |
|                      | 5 Prostate cancer                                                             | 773       | 59                       | 89                                   | 66%         | 1.01804E-24 |
|                      | 6 T cell receptor signaling pathway                                           | 692       | 64                       | 108                                  | 59%         | 7.22657E-23 |
|                      | 7 Hepatitis C                                                                 | 10396     | 73                       | 136                                  | 54%         | 1.5177E-22  |
|                      | 8 B cell receptor signaling pathway                                           | 790       | 51                       | 75                                   | 68%         | 3.73379E-22 |
|                      | 9 Chagas disease (American trypanosomiasis)                                   | 10401     | 58                       | 102                                  | 57%         | 1.66943E-19 |
|                      | 10 Cell cycle                                                                 | 717       | 64                       | 121                                  | 53%         | 2.59044E-19 |
|                      | 11 Acute myeloid leukemia                                                     | 671       | 41                       | 57                                   | 72%         | 3.05256E-19 |
|                      | 12 Focal adhesion                                                             | 788       | 85                       | 197                                  | 43%         | 2.52813E-18 |
|                      | 13 Chemokine signaling pathway                                                | 4351      | 78                       | 173                                  | 45%         | 3.43869E-18 |
|                      | 14 ErbB signaling pathway                                                     | 627       | 51                       | 87                                   | 59%         | 4.72618E-18 |
|                      | 15 Jak-STAT signaling pathway                                                 | 651       | 71                       | 150                                  | 47%         | 4.86359E-18 |
|                      | 16 MAPK signaling pathway                                                     | 728       | 102                      | 266                                  | 38%         | 1.22791E-17 |
|                      | 17 Colorectal cancer                                                          | 702       | 41                       | 62                                   | 66%         | 2.9317E-17  |
|                      | 18 Toll-like receptor signaling pathway                                       | 699       | 54                       | 100                                  | 54%         | 5.8244E-17  |
|                      | 19 Wnt signaling pathway                                                      | 698       | 69                       | 149                                  | 46%         | 6.14458E-17 |
|                      | 20 Insulin signaling pathway                                                  | 664       | 64                       | 134                                  | 48%         | 1.47603E-16 |
|                      | 21 Pancreatic cancer                                                          | 795       | 43                       | 70                                   | 61%         | 2.2762E-16  |
|                      | 22 Small cell lung cancer                                                     | 747       | 47                       | 83                                   | 57%         | 5.5559E-16  |

|    |                                                        |       |    |     |     |             |
|----|--------------------------------------------------------|-------|----|-----|-----|-------------|
| 23 | Renal cell carcinoma                                   | 620   | 42 | 70  | 60% | 1.46836E-15 |
| 24 | Glioma                                                 | 740   | 39 | 62  | 63% | 1.7908E-15  |
| 25 | Non-small cell lung cancer                             | 787   | 36 | 54  | 67% | 1.80449E-15 |
| 26 | Endometrial cancer                                     | 609   | 35 | 52  | 67% | 3.16777E-15 |
| 27 | Fc gamma R-mediated phagocytosis                       | 4349  | 47 | 87  | 54% | 6.48613E-15 |
| 28 | Fc epsilon RI signaling pathway                        | 708   | 42 | 78  | 54% | 2.59007E-13 |
| 29 | Bacterial invasion of epithelial cells                 | 10403 | 39 | 69  | 57% | 2.60149E-13 |
| 30 | Toxoplasmosis                                          | 10393 | 55 | 121 | 45% | 3.01498E-13 |
| 31 | Adherens junction                                      | 741   | 40 | 73  | 55% | 4.73993E-13 |
| 32 | Melanogenesis                                          | 694   | 46 | 97  | 47% | 5.79398E-12 |
| 33 | Apoptosis                                              | 759   | 42 | 84  | 50% | 6.29912E-12 |
| 34 | RIG-I-like receptor signaling pathway                  | 5715  | 37 | 69  | 54% | 9.65369E-12 |
| 35 | NOD-like receptor signaling pathway                    | 8111  | 33 | 61  | 54% | 1.18142E-10 |
| 36 | Regulation of actin cytoskeleton                       | 724   | 73 | 212 | 34% | 3.36245E-10 |
| 37 | Leishmaniasis                                          | 10360 | 33 | 64  | 52% | 5.66875E-10 |
| 38 | Natural killer cell mediated cytotoxicity              | 716   | 55 | 142 | 39% | 5.67209E-10 |
| 39 | Type II diabetes mellitus                              | 641   | 28 | 49  | 57% | 6.62803E-10 |
| 40 | Adipocytokine signaling pathway                        | 758   | 34 | 68  | 50% | 8.42947E-10 |
| 41 | Tight junction                                         | 607   | 49 | 131 | 37% | 2.2888E-08  |
| 42 | Leukocyte transendothelial migration                   | 755   | 45 | 117 | 38% | 3.59851E-08 |
| 43 | Aldosterone-regulated sodium reabsorption              | 8108  | 24 | 44  | 55% | 4.83209E-08 |
| 44 | VEGF signaling pathway                                 | 645   | 33 | 74  | 45% | 5.74247E-08 |
| 45 | Thyroid cancer                                         | 704   | 19 | 30  | 63% | 6.37896E-08 |
| 46 | Progesterone-mediated oocyte maturation                | 5709  | 36 | 85  | 42% | 6.38028E-08 |
| 47 | Bladder cancer                                         | 616   | 23 | 42  | 55% | 8.41295E-08 |
| 48 | Gap junction                                           | 700   | 36 | 86  | 42% | 8.66549E-08 |
| 49 | Basal cell carcinoma                                   | 663   | 27 | 55  | 49% | 9.80502E-08 |
| 50 | TGF-beta signaling pathway                             | 633   | 35 | 83  | 42% | 1.0685E-07  |
| 51 | Melanoma                                               | 713   | 31 | 71  | 44% | 2.63292E-07 |
| 52 | Endocytosis                                            | 4385  | 64 | 212 | 30% | 1.05325E-06 |
| 53 | Amyotrophic lateral sclerosis (ALS)                    | 2811  | 25 | 54  | 46% | 1.19632E-06 |
| 54 | Long-term potentiation                                 | 729   | 28 | 66  | 42% | 2.11294E-06 |
| 55 | Ubiquitin mediated proteolysis                         | 632   | 45 | 134 | 34% | 2.69858E-06 |
| 56 | MTOR signaling pathway                                 | 743   | 24 | 53  | 45% | 3.30836E-06 |
| 57 | P53 signaling pathway                                  | 666   | 27 | 65  | 42% | 5.32623E-06 |
| 58 | GnRH signaling pathway                                 | 723   | 34 | 95  | 36% | 1.26652E-05 |
| 59 | Axon guidance                                          | 612   | 42 | 129 | 33% | 1.48924E-05 |
| 60 | Proteasome                                             | 630   | 20 | 43  | 47% | 1.56534E-05 |
| 61 | Oocyte meiosis                                         | 8114  | 36 | 106 | 34% | 2.28154E-05 |
| 62 | Cytosolic DNA-sensing pathway                          | 8116  | 23 | 55  | 42% | 2.45712E-05 |
| 63 | Arrhythmogenic right ventricular cardiomyopathy (ARVC) | 4368  | 28 | 74  | 38% | 2.4832E-05  |
| 64 | Carbohydrate digestion and absorption                  | 10378 | 17 | 37  | 46% | 8.42326E-05 |
| 65 | Malaria                                                | 10373 | 20 | 50  | 40% | 0.000183042 |
| 66 | Long-term depression                                   | 775   | 25 | 70  | 36% | 0.000198074 |
| 67 | Phagosome                                              | 10382 | 46 | 163 | 28% | 0.000230554 |
| 68 | Prion diseases                                         | 4363  | 15 | 33  | 45% | 0.000273115 |
| 69 | Huntington's disease                                   | 4374  | 47 | 169 | 28% | 0.000281532 |
| 70 | Cytokine-cytokine receptor interaction                 | 604   | 64 | 252 | 25% | 0.000308535 |
| 71 | African trypanosomiasis                                | 10402 | 13 | 29  | 45% | 0.000852823 |
| 72 | Hematopoietic cell lineage                             | 682   | 26 | 81  | 32% | 0.000894686 |
| 73 | Notch signaling pathway                                | 657   | 18 | 48  | 38% | 0.000922223 |
| 74 | Primary immunodeficiency                               | 2817  | 14 | 34  | 41% | 0.001354056 |
| 75 | Dorso-ventral axis formation                           | 4372  | 10 | 22  | 45% | 0.003079643 |
| 76 | Gastric acid secretion                                 | 10371 | 21 | 70  | 30% | 0.006321168 |
| 77 | Amoebiasis                                             | 10368 | 30 | 113 | 27% | 0.00706257  |
| 78 | Ribosome                                               | 756   | 22 | 76  | 29% | 0.00779761  |
| 79 | Alzheimer's disease                                    | 675   | 38 | 157 | 24% | 0.011678893 |
| 80 | Dilated cardiomyopathy                                 | 5708  | 24 | 89  | 27% | 0.013403108 |
| 81 | Vascular smooth muscle contraction                     | 4355  | 30 | 124 | 24% | 0.025187978 |
| 82 | Circadian rhythm - mammal                              | 796   | 8  | 21  | 38% | 0.025674658 |

### REACTOME Database

|    |                                                                              |       |    |    |      |             |
|----|------------------------------------------------------------------------------|-------|----|----|------|-------------|
| 1  | Transcriptional Regulation of Adipocyte Differentiation in 3T3-L1 Pre-adipoc | 11965 | 34 | 52 | 65%  | 2.80808E-14 |
| 2  | Transcriptional Regulation of White Adipocyte Differentiation                | 11800 | 34 | 52 | 65%  | 2.80808E-14 |
| 3  | Signaling by SCF-KIT                                                         | 11930 | 18 | 22 | 82%  | 2.41395E-10 |
| 4  | Orc1 removal from chromatin                                                  | 11586 | 34 | 70 | 49%  | 2.19312E-09 |
| 5  | Downstream TCR signaling                                                     | 11566 | 21 | 34 | 62%  | 2.16889E-08 |
| 6  | Signal transduction by L1                                                    | 11779 | 15 | 20 | 75%  | 7.29103E-08 |
| 7  | Tie2 Signaling                                                               | 11712 | 13 | 16 | 81%  | 1.3395E-07  |
| 8  | CD28 dependent PI3K/Akt signaling                                            | 11559 | 13 | 17 | 76%  | 4.60036E-07 |
| 9  | Downstream signal transduction                                               | 11833 | 13 | 17 | 76%  | 4.60036E-07 |
| 10 | Generic Transcription Pathway                                                | 11504 | 13 | 17 | 76%  | 4.60036E-07 |
| 11 | Folding of actin by CCT/TriC                                                 | 11961 | 9  | 9  | 100% | 5.37443E-07 |
| 12 | Assembly of the pre-replicative complex                                      | 11614 | 12 | 15 | 80%  | 6.15745E-07 |
| 13 | Signal attenuation                                                           | 11877 | 11 | 13 | 85%  | 7.53309E-07 |
| 14 | GPVI-mediated activation cascade                                             | 11707 | 17 | 28 | 61%  | 7.60351E-07 |
| 15 | Prefoldin mediated transfer of substrate to CCT/TriC                         | 11962 | 16 | 26 | 62%  | 1.35774E-06 |
| 16 | Viral dsRNA:TLR3:TRIF Complex Activates RIP1                                 | 11473 | 11 | 14 | 79%  | 2.71644E-06 |
| 17 | Removal of licensing factors from oriains                                    | 11620 | 12 | 17 | 71%  | 5.22156E-06 |
| 18 | Activation of the pre-replicative complex                                    | 11597 | 16 | 28 | 57%  | 5.25383E-06 |
| 19 | CTLA4 inhibitory signaling                                                   | 11558 | 10 | 13 | 77%  | 1.22256E-05 |
| 20 | NCAM signaling for neurite out-growth                                        | 11784 | 10 | 13 | 77%  | 1.22256E-05 |
| 21 | Signaling by TGF beta                                                        | 11835 | 10 | 13 | 77%  | 1.22256E-05 |
| 22 | TNF signaling                                                                | 11758 | 7  | 7  | 100% | 1.54034E-05 |
| 23 | Degradation of beta-catenin by the destruction complex                       | 11838 | 25 | 61 | 41%  | 1.57205E-05 |
| 24 | Recycling pathway of L1                                                      | 11781 | 11 | 16 | 69%  | 1.91475E-05 |
| 25 | CDT1 association with the CDC6:ORC:origin complex                            | 11612 | 24 | 58 | 41%  | 1.95465E-05 |
| 26 | Activation of ATR in response to replication stress                          | 11577 | 18 | 37 | 49%  | 2.01979E-05 |
| 27 | EGFR downregulation                                                          | 11817 | 14 | 25 | 56%  | 2.84739E-05 |
| 28 | Generation of second messenger molecules                                     | 11568 | 12 | 20 | 60%  | 5.03754E-05 |
| 29 | Regulation of KIT signaling                                                  | 11929 | 8  | 10 | 80%  | 7.04795E-05 |
| 30 | Unblocking of NMDA receptor, glutamate binding and activation                | 11689 | 8  | 10 | 80%  | 7.04795E-05 |
| 31 | Translation initiation complex formation                                     | 11545 | 26 | 70 | 37%  | 7.39569E-05 |
| 32 | Netrin-1 signaling                                                           | 11793 | 10 | 15 | 67%  | 7.40479E-05 |
| 33 | Autodegradation of the E3 ubiquitin ligase COP1                              | 11570 | 21 | 51 | 41%  | 7.66958E-05 |
| 34 | Ubiquitin-dependent degradation of Cyclin D1                                 | 11583 | 21 | 51 | 41%  | 7.66958E-05 |
| 35 | Switching of origins to a post-replicative state                             | 11588 | 6  | 6  | 100% | 7.82359E-05 |
| 36 | TRAF3-dependent IRF activation pathway                                       | 11494 | 6  | 6  | 100% | 7.82359E-05 |
| 37 | PIP3 activates AKT signaling                                                 | 11815 | 7  | 8  | 88%  | 8.38851E-05 |
| 38 | Trafficking of GluR2-containing AMPA receptors                               | 11687 | 7  | 8  | 88%  | 8.38851E-05 |

|     |                                                                              |       |    |    |      |             |
|-----|------------------------------------------------------------------------------|-------|----|----|------|-------------|
| 39  | SCF(Skp2)-mediated degradation of p27/p21                                    | 11584 | 21 | 52 | 40%  | 0.000101845 |
| 40  | Recruitment of mitotic centrosome proteins and complexes                     | 11625 | 25 | 68 | 37%  | 0.000119622 |
| 41  | CDK-mediated phosphorylation and removal of Cdc6                             | 11587 | 20 | 50 | 40%  | 0.000183042 |
| 42  | AKT phosphorylates targets in the cytosol                                    | 11813 | 8  | 11 | 73%  | 0.000190578 |
| 43  | CDC6 association with the ORC:origin complex                                 | 11611 | 8  | 11 | 73%  | 0.000190578 |
| 44  | NF-kB is activated and signals survival                                      | 11914 | 8  | 11 | 73%  | 0.000190578 |
| 45  | Sema3A PAK dependent Axon repulsion                                          | 11776 | 8  | 11 | 73%  | 0.000190578 |
| 46  | Ribosomal scanning and start codon recognition                               | 11544 | 25 | 70 | 36%  | 0.000198074 |
| 47  | DCC mediated attractive signaling                                            | 11792 | 9  | 14 | 64%  | 0.000264685 |
| 48  | Activation of Pro-Caspase 8                                                  | 11759 | 7  | 9  | 78%  | 0.000282208 |
| 49  | CD28 dependent Vav1 pathway                                                  | 11560 | 7  | 9  | 78%  | 0.000282208 |
| 50  | TAK1 activates NFkB by phosphorylation and activation of IKKs complex        | 11458 | 7  | 9  | 78%  | 0.000282208 |
| 51  | TRAF6 mediated NF-kB activation                                              | 11487 | 7  | 9  | 78%  | 0.000282208 |
| 52  | Ubiquitin Mediated Degradation of Phosphorylated Cdc25A                      | 11573 | 20 | 52 | 38%  | 0.000313597 |
| 53  | G beta:gamma signalling through PI3Kgamma                                    | 11868 | 6  | 7  | 86%  | 0.000387043 |
| 54  | NrCAM interactions                                                           | 11780 | 6  | 7  | 86%  | 0.000387043 |
| 55  | PI3K Cascade                                                                 | 11887 | 6  | 7  | 86%  | 0.000387043 |
| 56  | SHC-mediated signalling                                                      | 11890 | 5  | 5  | 100% | 0.000391416 |
| 57  | SCF-beta-TrCP mediated degradation of Emi1                                   | 11607 | 20 | 53 | 38%  | 0.000412057 |
| 58  | Loss of Nlp from mitotic centrosomes                                         | 11622 | 22 | 61 | 36%  | 0.000414393 |
| 59  | Loss of proteins required for interphase microtubule organization - from the | 11623 | 22 | 61 | 36%  | 0.000414393 |
| 60  | Integrin alphaIIb beta3 signaling                                            | 11705 | 10 | 18 | 56%  | 0.000503851 |
| 61  | Regulation of ornithine decarboxylase (ODC)                                  | 11365 | 19 | 51 | 37%  | 0.000716271 |
| 62  | E2F-enabled inhibition of pre-replication complex formation                  | 11598 | 7  | 10 | 70%  | 0.000738762 |
| 63  | Cdc20:Phospho-APC/C mediated degradation of Cyclin A                         | 11764 | 23 | 68 | 34%  | 0.000854033 |
| 64  | CDO in myogenesis                                                            | 11806 | 8  | 13 | 62%  | 0.0009089   |
| 65  | Axonal growth inhibition (RHOA activation)                                   | 11912 | 6  | 8  | 75%  | 0.001160334 |
| 66  | Regulation of activated PAK-2p34 by proteasome mediated degradation          | 11740 | 18 | 49 | 37%  | 0.001173166 |
| 67  | Circadian Clock (mouse)                                                      | 12010 | 10 | 20 | 50%  | 0.00140367  |
| 68  | Signalling by BMP                                                            | 11836 | 10 | 20 | 50%  | 0.00140367  |
| 69  | Caspase-mediated cleavage of cytoskeletal proteins                           | 11744 | 7  | 11 | 64%  | 0.001530876 |
| 70  | Costimulation by the CD28 family                                             | 11563 | 7  | 11 | 64%  | 0.001530876 |
| 71  | DSCAM interactions                                                           | 12007 | 7  | 11 | 64%  | 0.001530876 |
| 72  | GAB1 signalosome                                                             | 11816 | 7  | 11 | 64%  | 0.001530876 |
| 73  | Signal regulatory protein (SIRP) family interactions                         | 12006 | 7  | 11 | 64%  | 0.001530876 |
| 74  | Unwinding of DNA                                                             | 11594 | 7  | 11 | 64%  | 0.001530876 |
| 75  | p75NTR recruits signalling complexes                                         | 11915 | 7  | 11 | 64%  | 0.001530876 |
| 76  | G alpha (12/13) signalling events                                            | 11865 | 8  | 14 | 57%  | 0.001624922 |
| 77  | Assembly of the ORC complex at the origin of replication                     | 11613 | 5  | 6  | 83%  | 0.001628804 |
| 78  | NOD1/2 Signaling Pathway                                                     | 11493 | 5  | 6  | 83%  | 0.001628804 |
| 79  | Viral dsRNA:TLR3:TRIF Complex Activates TBK1/IKK epsilon                     | 11475 | 5  | 6  | 83%  | 0.001628804 |
| 80  | APC/C:Cdc20 mediated degradation of Securin                                  | 11603 | 21 | 63 | 33%  | 0.001639164 |
| 81  | Formation of the ternary complex, and subsequently, the 43S complex          | 11540 | 21 | 63 | 33%  | 0.001639164 |
| 82  | Autodegradation of Cdh1 by Cdh1:APC/C                                        | 11610 | 20 | 59 | 34%  | 0.001717341 |
| 83  | FOXO1-mediated regulation of Pdx1 expression                                 | 11964 | 4  | 4  | 100% | 0.001877491 |
| 84  | FasL/ CD95L signaling                                                        | 11756 | 4  | 4  | 100% | 0.001877491 |
| 85  | MEK activation                                                               | 11491 | 4  | 4  | 100% | 0.001877491 |
| 86  | RAF phosphorylates MEK                                                       | 11490 | 4  | 4  | 100% | 0.001877491 |
| 87  | SOS-mediated signalling                                                      | 11888 | 4  | 4  | 100% | 0.001877491 |
| 88  | APC/C:Cdh1 mediated degradation of Cdc20 and other APC/C:Cdh1 targets        | 11601 | 22 | 68 | 32%  | 0.001880753 |
| 89  | Association of Tric/CCT with target proteins during biosynthesis             | 11960 | 10 | 21 | 48%  | 0.002017946 |
| 90  | G alpha (q) signalling events                                                | 11869 | 9  | 18 | 50%  | 0.002396321 |
| 91  | CD28 co-stimulation                                                          | 11561 | 6  | 9  | 67%  | 0.00255107  |
| 92  | NICD traffics to nucleus                                                     | 11924 | 6  | 9  | 67%  | 0.00255107  |
| 93  | PI3K/AKT activation                                                          | 11899 | 6  | 9  | 67%  | 0.00255107  |
| 94  | Circadian Clock                                                              | 11768 | 9  | 19 | 47%  | 0.003742998 |
| 95  | RNA Polymerase I Promoter Opening                                            | 11500 | 5  | 7  | 71%  | 0.00432736  |
| 96  | Signalling to RAS                                                            | 11906 | 5  | 7  | 71%  | 0.00432736  |
| 97  | TRAF6 Mediated Induction of proinflammatory cytokines                        | 11474 | 5  | 7  | 71%  | 0.00432736  |
| 98  | Association of licensing factors with the pre-replicative complex            | 11619 | 7  | 13 | 54%  | 0.004901071 |
| 99  | Cyclin D associated events in G1                                             | 11600 | 7  | 13 | 54%  | 0.004901071 |
| 100 | Acetylcholine Neurotransmitter Release Cycle                                 | 11686 | 6  | 10 | 60%  | 0.004988334 |
| 101 | GRB2:SOS provides linkage to MAPK signaling for Integrins                    | 11704 | 6  | 10 | 60%  | 0.004988334 |
| 102 | p130Cas linkage to MAPK signaling for integrins                              | 11703 | 6  | 10 | 60%  | 0.004988334 |
| 103 | Apoptotic cleavage of cellular proteins                                      | 11746 | 8  | 17 | 47%  | 0.00673836  |
| 104 | Post-chaperonin tubulin folding pathway                                      | 11959 | 8  | 17 | 47%  | 0.00673836  |
| 105 | G2/M DNA damage checkpoint                                                   | 11579 | 4  | 5  | 80%  | 0.006863086 |
| 106 | MyD88 dependent cascade initiated on endosome                                | 11470 | 4  | 5  | 80%  | 0.006863086 |
| 107 | Netrin mediated repulsion signals                                            | 11791 | 4  | 5  | 80%  | 0.006863086 |
| 108 | Notch-HLH transcription pathway                                              | 11503 | 4  | 5  | 80%  | 0.006863086 |
| 109 | PI-3K cascade                                                                | 11832 | 4  | 5  | 80%  | 0.006863086 |
| 110 | SMAC binds to IAPs                                                           | 11733 | 4  | 5  | 80%  | 0.006863086 |
| 111 | SMAC-mediated dissociation of IAP:caspase complexes                          | 11734 | 4  | 5  | 80%  | 0.006863086 |
| 112 | Cyclin E associated events during G1/S transition                            | 11596 | 7  | 14 | 50%  | 0.007774271 |
| 113 | Glutamate Neurotransmitter Release Cycle                                     | 11683 | 7  | 14 | 50%  | 0.007774271 |
| 114 | Beta-catenin phosphorylation cascade                                         | 11837 | 6  | 11 | 55%  | 0.008691627 |
| 115 | Norepinephrine Neurotransmitter Release Cycle                                | 11684 | 6  | 11 | 55%  | 0.008691627 |
| 116 | Recruitment of NuMA to mitotic centrosomes                                   | 11624 | 6  | 11 | 55%  | 0.008691627 |
| 117 | Retrograde neurotrophin signalling                                           | 11908 | 6  | 11 | 55%  | 0.008691627 |
| 118 | SEMA3A-Plexin repulsion signaling by inhibiting Integrin adhesion            | 11773 | 6  | 11 | 55%  | 0.008691627 |
| 119 | ERK1 activation                                                              | 11460 | 3  | 3  | 100% | 0.009219503 |
| 120 | Interleukin-1 signaling                                                      | 11489 | 3  | 3  | 100% | 0.009219503 |
| 121 | NF-kB activation through FADD/RIP-1 pathway mediated by caspase-8 and        | 11488 | 3  | 3  | 100% | 0.009219503 |
| 122 | Signaling by NODAL                                                           | 11807 | 3  | 3  | 100% | 0.009219503 |
| 123 | Stabilization of p53                                                         | 11571 | 3  | 3  | 100% | 0.009219503 |
| 124 | c-src mediated regulation of Cx43 function and closure of gap junctions      | 11939 | 3  | 3  | 100% | 0.009219503 |
| 125 | RNA Polymerase II Pre-transcription Events                                   | 11548 | 18 | 61 | 30%  | 0.013402387 |
| 126 | Processing of Capped Intron-Containing Pre-mRNA                              | 11520 | 13 | 39 | 33%  | 0.013515786 |
| 127 | CRMPs in Sema3A signaling                                                    | 11775 | 6  | 12 | 50%  | 0.014305802 |
| 128 | PD-1 signaling                                                               | 11562 | 6  | 12 | 50%  | 0.014305802 |
| 129 | Golgi Associated Vesicle Biogenesis                                          | 11934 | 11 | 31 | 35%  | 0.014591232 |
| 130 | IRS activation                                                               | 11889 | 4  | 6  | 67%  | 0.016156253 |
| 131 | NADE modulates death signalling                                              | 11918 | 4  | 6  | 67%  | 0.016156253 |
| 132 | Release of eIF4E                                                             | 11881 | 4  | 6  | 67%  | 0.016156253 |
| 133 | ERK/MAPK targets                                                             | 11465 | 7  | 16 | 44%  | 0.017312049 |
| 134 | Regulation of Insulin Secretion                                              | 11347 | 7  | 16 | 44%  | 0.017312049 |
| 135 | Insulin Synthesis and Processing                                             | 11797 | 8  | 20 | 40%  | 0.018958006 |
| 136 | Lysosome Vesicle Biogenesis                                                  | 11935 | 9  | 24 | 38%  | 0.019361587 |
| 137 | Cyclin A/B1 associated events during G2/M transition                         | 11627 | 6  | 13 | 46%  | 0.021869274 |

|            |                                                                                                      |       |    |    |      |             |
|------------|------------------------------------------------------------------------------------------------------|-------|----|----|------|-------------|
| <b>138</b> | Trafficking of AMPA receptors                                                                        | 11688 | 6  | 13 | 46%  | 0.021869274 |
| <b>139</b> | Elongation arrest and recovery                                                                       | 11496 | 11 | 33 | 33%  | 0.023272811 |
| <b>140</b> | Pausing and recovery of elongation                                                                   | 11933 | 11 | 33 | 33%  | 0.023272811 |
| <b>141</b> | Activation of PKB                                                                                    | 11878 | 3  | 4  | 75%  | 0.029041144 |
| <b>142</b> | Axonal growth stimulation                                                                            | 11913 | 3  | 4  | 75%  | 0.029041144 |
| <b>143</b> | Fatty Acyl-CoA Biosynthesis                                                                          | 11433 | 3  | 4  | 75%  | 0.029041144 |
| <b>144</b> | Phosphorylation of proteins involved in G1/S transition by active Cyclin E:Cdk2                      | 11595 | 3  | 4  | 75%  | 0.029041144 |
| <b>145</b> | Role of second messengers in netrin-1 signaling                                                      | 11790 | 3  | 4  | 75%  | 0.029041144 |
| <b>146</b> | mTOR signalling                                                                                      | 11885 | 3  | 4  | 75%  | 0.029041144 |
| <b>147</b> | Activation of the mRNA upon binding of the cap-binding complex and eIFs, eIF4E                       | 11546 | 4  | 7  | 57%  | 0.030138138 |
| <b>148</b> | Late stage (branching morphogenesis) pancreatic bud precursor cells                                  | 11969 | 4  | 7  | 57%  | 0.030138138 |
| <b>149</b> | Regulation of gene expression in late stage (branching morphogenesis) pancreatic bud precursor cells | 11801 | 4  | 7  | 57%  | 0.030138138 |
| <b>150</b> | Cyclin A:Cdk2-associated events at S phase entry                                                     | 11585 | 6  | 14 | 43%  | 0.031194774 |
| <b>151</b> | G-protein activation                                                                                 | 11872 | 5  | 11 | 45%  | 0.040605503 |
| <b>152</b> | Hormone-sensitive lipase (HSL)-mediated triacylglycerol hydrolysis                                   | 11416 | 5  | 11 | 45%  | 0.040605503 |
| <b>153</b> | RNA Polymerase II Promoter Escape                                                                    | 11552 | 12 | 41 | 29%  | 0.04624533  |
| <b>154</b> | RNA Polymerase II Transcription Initiation                                                           | 11553 | 12 | 41 | 29%  | 0.04624533  |
| <b>155</b> | RNA Polymerase II Transcription Initiation And Promoter Clearance                                    | 11554 | 12 | 41 | 29%  | 0.04624533  |
| <b>156</b> | RNA Polymerase II Transcription Pre-Initiation And Promoter Opening                                  | 11547 | 12 | 41 | 29%  | 0.04624533  |
| <b>157</b> | AKT-mediated inactivation of FOXO1A                                                                  | 11802 | 2  | 2  | 100% | 0.046762678 |
| <b>158</b> | Activation of Chaperones by IRE1alpha                                                                | 11795 | 2  | 2  | 100% | 0.046762678 |
| <b>159</b> | Activation of IRF3/IRF7 mediated by TBK1/IKK epsilon                                                 | 11478 | 2  | 2  | 100% | 0.046762678 |
| <b>160</b> | DNA Damage Recognition in GG-NER                                                                     | 11651 | 2  | 2  | 100% | 0.046762678 |
| <b>161</b> | ERK2 activation                                                                                      | 11459 | 2  | 2  | 100% | 0.046762678 |
| <b>162</b> | Formation of tubulin folding intermediates by CCT/TriC                                               | 10954 | 2  | 2  | 100% | 0.046762678 |
| <b>163</b> | Inhibition of HSL                                                                                    | 11763 | 2  | 2  | 100% | 0.046762678 |
| <b>164</b> | Localization of the PINCH-ILK-PARVIN complex to focal adhesions                                      | 12000 | 2  | 2  | 100% | 0.046762678 |
| <b>165</b> | PDE3B signalling                                                                                     | 11886 | 2  | 2  | 100% | 0.046762678 |
| <b>166</b> | RAF activation                                                                                       | 11492 | 2  | 2  | 100% | 0.046762678 |
| <b>167</b> | Transcriptional activation of cell cycle inhibitor p21                                               | 11572 | 2  | 2  | 100% | 0.046762678 |
| <b>168</b> | NRAGE signals death through JNK                                                                      | 11920 | 4  | 8  | 50%  | 0.048578563 |
| <b>169</b> | Sema4D mediated inhibition of cell attachment and migration                                          | 11771 | 4  | 8  | 50%  | 0.048578563 |
| <b>170</b> | RNA Polymerase II Transcription Elongation                                                           | 11551 | 12 | 42 | 29%  | 0.052175418 |
| <b>171</b> | G beta:gamma signalling through PLC beta                                                             | 11867 | 3  | 5  | 60%  | 0.05476897  |
| <b>172</b> | G2 Phase                                                                                             | 11621 | 3  | 5  | 60%  | 0.05476897  |
| <b>173</b> | Negative regulation of the PI3K/AKT network                                                          | 11814 | 3  | 5  | 60%  | 0.05476897  |
| <b>174</b> | Neurophilin interactions with VEGF and VEGFR                                                         | 11895 | 3  | 5  | 60%  | 0.05476897  |
| <b>175</b> | RIG-I/MDA5 mediated induction of IFN-alpha/beta pathways                                             | 11495 | 3  | 5  | 60%  | 0.05476897  |
| <b>176</b> | Rho GTPase cycle                                                                                     | 11931 | 3  | 5  | 60%  | 0.05476897  |
| <b>177</b> | S6K1-mediated signalling                                                                             | 11880 | 3  | 5  | 60%  | 0.05476897  |
| <b>178</b> | SHC1 events in EGFR signaling                                                                        | 11811 | 3  | 5  | 60%  | 0.05476897  |
| <b>179</b> | Toll Like Receptor 9 (TLR9) Cascade                                                                  | 11472 | 3  | 5  | 60%  | 0.05476897  |

Table S4. Gene expression analysis of macrophage responses to *Legionella* infection - Number of mRNA molecules was determined by nanoString analysis of cell lysates from BMMs infected for 3hrs with L.p. or dotA at MOI of 10

| Biological function | Gene name     | mRNA Molecular Counts |       |       | Counts [ $\log_2$ ] |       |       | Fold induction |         |         |
|---------------------|---------------|-----------------------|-------|-------|---------------------|-------|-------|----------------|---------|---------|
|                     |               | Uninfected            | L.p.  | dotA  | Uninfected          | L.p.  | dotA  | Uninfected     | L.p.    | dotA    |
| Housekeeping genes  | <b>Cltc</b>   | 5897                  | 6062  | 6012  | 12.53               | 12.57 | 12.55 | 1.00           | 1.03    | 1.02    |
|                     | <b>Gapdh</b>  | 5224                  | 5430  | 5429  | 12.35               | 12.41 | 12.41 | 1.00           | 1.04    | 1.04    |
|                     | <b>Gusb</b>   | 4266                  | 2783  | 2973  | 12.06               | 11.44 | 11.54 | 1.00           | 0.65    | 0.70    |
|                     | <b>Pgk1</b>   | 1144                  | 1741  | 1547  | 10.16               | 10.77 | 10.60 | 1.00           | 1.52    | 1.35    |
|                     | <b>Tubb5</b>  | 1369                  | 674   | 665   | 10.42               | 9.40  | 9.38  | 1.00           | 0.49    | 0.49    |
|                     | <b>Hprt</b>   | 628                   | 587   | 592   | 9.29                | 9.20  | 9.21  | 1.00           | 0.93    | 0.94    |
| Cytokines genes     | <b>Ccl3</b>   | 1895                  | 91163 | 74651 | 10.89               | 16.48 | 16.19 | 1.00           | 48.11   | 39.39   |
|                     | <b>Ccl4</b>   | 2497                  | 79517 | 71631 | 11.29               | 16.28 | 16.13 | 1.00           | 31.85   | 28.69   |
|                     | <b>Tnf</b>    | 2718                  | 58822 | 46925 | 11.41               | 15.84 | 15.52 | 1.00           | 21.64   | 17.26   |
|                     | <b>Il1b</b>   | 197                   | 56244 | 49505 | 7.62                | 15.78 | 15.60 | 1.00           | 285.50  | 251.29  |
|                     | <b>Cxcl2</b>  | 696                   | 36962 | 23963 | 9.44                | 15.17 | 14.55 | 1.00           | 53.11   | 34.43   |
|                     | <b>C1qb</b>   | 25892                 | 24830 | 25977 | 14.66               | 14.60 | 14.66 | 1.00           | 0.96    | 1.00    |
|                     | <b>Ccl5</b>   | 627                   | 20417 | 18579 | 9.29                | 14.32 | 14.18 | 1.00           | 32.56   | 29.63   |
|                     | <b>Cxcl3</b>  | 19                    | 10418 | 7881  | 4.25                | 13.35 | 12.94 | 1.00           | 548.32  | 414.79  |
|                     | <b>Il1a</b>   | 12                    | 6921  | 4008  | 3.58                | 12.76 | 11.97 | 1.00           | 576.75  | 334.00  |
|                     | <b>Cxcl10</b> | 299                   | 6622  | 7130  | 8.22                | 12.69 | 12.80 | 1.00           | 22.15   | 23.85   |
|                     | <b>Tgfb1</b>  | 3758                  | 4557  | 4345  | 11.88               | 12.15 | 12.09 | 1.00           | 1.21    | 1.16    |
|                     | <b>C1qa</b>   | 4992                  | 4264  | 4463  | 12.29               | 12.06 | 12.12 | 1.00           | 0.85    | 0.89    |
|                     | <b>Il12b</b>  | 13                    | 3738  | 3186  | 3.70                | 11.87 | 11.64 | 1.00           | 287.54  | 245.08  |
|                     | <b>Il6</b>    | 2                     | 3502  | 3235  | 1.00                | 11.77 | 11.66 | 1.00           | 1751.00 | 1617.50 |
|                     | <b>Il15</b>   | 102                   | 2123  | 2035  | 6.67                | 11.05 | 10.99 | 1.00           | 20.81   | 19.95   |
|                     | <b>Ccl2</b>   | 109                   | 2042  | 1696  | 6.77                | 11.00 | 10.73 | 1.00           | 18.73   | 15.56   |
|                     | <b>Csf1</b>   | 46                    | 1292  | 971   | 5.52                | 10.34 | 9.92  | 1.00           | 28.09   | 21.11   |
|                     | <b>Il18</b>   | 94                    | 831   | 898   | 6.55                | 9.70  | 9.81  | 1.00           | 8.84    | 9.55    |
|                     | <b>Cxcl1</b>  | 5                     | 712   | 340   | 2.32                | 9.48  | 8.41  | 1.00           | 142.40  | 68.00   |
|                     | <b>Csf2</b>   | 5                     | 648   | 190   | 2.32                | 9.34  | 7.57  | 1.00           | 129.60  | 38.00   |
|                     | <b>Ccl22</b>  | 9                     | 447   | 434   | 3.17                | 8.80  | 8.76  | 1.00           | 49.67   | 48.22   |
|                     | <b>Cxcl9</b>  | 7                     | 155   | 183   | 2.81                | 7.28  | 7.52  | 1.00           | 22.14   | 26.14   |
|                     | <b>Ccl7</b>   | 14                    | 153   | 202   | 3.81                | 7.26  | 7.66  | 1.00           | 10.93   | 14.43   |
|                     | <b>Il12a</b>  | 4                     | 109   | 91    | 2.00                | 6.77  | 6.51  | 1.00           | 27.25   | 22.75   |
|                     | <b>Il23a</b>  | 2                     | 97    | 33    | 1.00                | 6.60  | 5.04  | 1.00           | 48.50   | 16.50   |
|                     | <b>Ccl17</b>  | 4                     | 95    | 81    | 2.00                | 6.57  | 6.34  | 1.00           | 23.75   | 20.25   |
|                     | <b>Ccl24</b>  | 10                    | 75    | 87    | 3.32                | 6.23  | 6.44  | 1.00           | 7.50    | 8.70    |
|                     | <b>Cxcl5</b>  | 8                     | 73    | 52    | 3.00                | 6.19  | 5.70  | 1.00           | 9.13    | 6.50    |
|                     | <b>Ccl8</b>   | 13                    | 72    | 44    | 3.70                | 6.17  | 5.46  | 1.00           | 5.54    | 3.38    |
|                     | <b>Ifnb1</b>  | 1                     | 71    | 30    | 0.00                | 6.15  | 4.91  | 1.00           | 71.00   | 30.00   |
|                     | <b>Csf3</b>   | 1                     | 69    | 54    | 0.00                | 6.11  | 5.75  | 1.00           | 69.00   | 54.00   |
|                     | <b>Il3</b>    | 10                    | 61    | 39    | 3.32                | 5.93  | 5.29  | 1.00           | 6.10    | 3.90    |
| <b>Il10</b>         | 12            | 41                    | 49    | 3.58  | 5.36                | 5.61  | 1.00  | 3.42           | 4.08    |         |
| <b>Ccl19</b>        | 7             | 36                    | 26    | 2.81  | 5.17                | 4.70  | 1.00  | 5.14           | 3.71    |         |
| <b>Tgfb2</b>        | 10            | 30                    | 29    | 3.32  | 4.91                | 4.86  | 1.00  | 3.00           | 2.90    |         |
| <b>Il11</b>         | 12            | 28                    | 29    | 3.58  | 4.81                | 4.86  | 1.00  | 2.33           | 2.42    |         |
| <b>Il2</b>          | 4             | 28                    | 25    | 2.00  | 4.81                | 4.64  | 1.00  | 7.00           | 6.25    |         |
| <b>Tgfb3</b>        | 9             | 27                    | 31    | 3.17  | 4.75                | 4.95  | 1.00  | 3.00           | 3.44    |         |
| <b>Fasl</b>         | 10            | 11                    | 6     | 3.32  | 3.46                | 2.58  | 1.00  | 1.10           | 0.60    |         |

|                           |                |       |       |       |       |       |       |         |         |         |
|---------------------------|----------------|-------|-------|-------|-------|-------|-------|---------|---------|---------|
|                           | <b>Ifna1</b>   | 0     | 7     | 7     | #NUM! | 2.81  | 2.81  | #DIV/0! | #DIV/0! | #DIV/0! |
|                           | <b>Il4</b>     | 5     | 7     | 6     | 2.32  | 2.81  | 2.58  | 1.00    | 1.40    | 1.20    |
|                           | <b>Il7</b>     | 2     | 7     | 3     | 1.00  | 2.81  | 1.58  | 1.00    | 3.50    | 1.50    |
|                           | <b>Il13</b>    | 2     | 6     | 7     | 1.00  | 2.58  | 2.81  | 1.00    | 3.00    | 3.50    |
|                           | <b>Il18rap</b> | 2     | 6     | 16    | 1.00  | 2.58  | 4.00  | 1.00    | 3.00    | 8.00    |
|                           | <b>Il5</b>     | 3     | 6     | 3     | 1.58  | 2.58  | 1.58  | 1.00    | 2.00    | 1.00    |
|                           | <b>Ccl11</b>   | 5     | 5     | 6     | 2.32  | 2.32  | 2.58  | 1.00    | 1.00    | 1.20    |
|                           | <b>Ifng</b>    | 1     | 5     | 1     | 0.00  | 2.32  | 0.00  | 1.00    | 5.00    | 1.00    |
|                           | <b>Il22</b>    | 1     | 3     | 2     | 0.00  | 1.58  | 1.00  | 1.00    | 3.00    | 2.00    |
|                           | <b>Ccl21a</b>  | 0     | 2     | 5     | #NUM! | 1.00  | 2.32  | #DIV/0! | #DIV/0! | #DIV/0! |
|                           | <b>Il9</b>     | 0     | 0     | 6     | #NUM! | #NUM! | 2.58  | #DIV/0! | #DIV/0! | #DIV/0! |
| Non-cytokine immune genes | <b>C3ar1</b>   | 12139 | 12386 | 12969 | 13.57 | 13.60 | 13.66 | 1.00    | 1.02    | 1.07    |
|                           | <b>Cd40</b>    | 224   | 9567  | 8243  | 7.81  | 13.22 | 13.01 | 1.00    | 42.71   | 36.80   |
|                           | <b>Cdc42</b>   | 7149  | 8453  | 8548  | 12.80 | 13.05 | 13.06 | 1.00    | 1.18    | 1.20    |
|                           | <b>Mapkapk</b> | 2213  | 7470  | 7093  | 11.11 | 12.87 | 12.79 | 1.00    | 3.38    | 3.21    |
|                           | <b>Nfe2l2</b>  | 2998  | 5478  | 5196  | 11.55 | 12.42 | 12.34 | 1.00    | 1.83    | 1.73    |
|                           | <b>Nfkb1</b>   | 788   | 5043  | 4610  | 9.62  | 12.30 | 12.17 | 1.00    | 6.40    | 5.85    |
|                           | <b>Itgb2</b>   | 5031  | 4659  | 4481  | 12.30 | 12.19 | 12.13 | 1.00    | 0.93    | 0.89    |
|                           | <b>Rhoa</b>    | 3846  | 3881  | 3956  | 11.91 | 11.92 | 11.95 | 1.00    | 1.01    | 1.03    |
|                           | <b>Gnas</b>    | 4456  | 3596  | 3583  | 12.12 | 11.81 | 11.81 | 1.00    | 0.81    | 0.80    |
|                           | <b>Cebpb</b>   | 1139  | 2701  | 2359  | 10.15 | 11.40 | 11.20 | 1.00    | 2.37    | 2.07    |
|                           | <b>C3</b>      | 799   | 2543  | 2630  | 9.64  | 11.31 | 11.36 | 1.00    | 3.18    | 3.29    |
|                           | <b>Tlr2</b>    | 1546  | 2492  | 2464  | 10.59 | 11.28 | 11.27 | 1.00    | 1.61    | 1.59    |
|                           | <b>Map2k1</b>  | 1093  | 2074  | 1918  | 10.09 | 11.02 | 10.91 | 1.00    | 1.90    | 1.75    |
|                           | <b>Gnb1</b>    | 1095  | 1767  | 1790  | 10.10 | 10.79 | 10.81 | 1.00    | 1.61    | 1.63    |
|                           | <b>Il10rb</b>  | 1853  | 1667  | 1553  | 10.86 | 10.70 | 10.60 | 1.00    | 0.90    | 0.84    |
|                           | <b>Ripk2</b>   | 193   | 1550  | 1507  | 7.59  | 10.60 | 10.56 | 1.00    | 8.03    | 7.81    |
|                           | <b>Mapk3</b>   | 1920  | 1511  | 1570  | 10.91 | 10.56 | 10.62 | 1.00    | 0.79    | 0.82    |
|                           | <b>Myd88</b>   | 517   | 1453  | 1411  | 9.01  | 10.50 | 10.46 | 1.00    | 2.81    | 2.73    |
|                           | <b>Rapgef2</b> | 226   | 1352  | 1164  | 7.82  | 10.40 | 10.18 | 1.00    | 5.98    | 5.15    |
|                           | <b>Rac1</b>    | 1382  | 1279  | 1343  | 10.43 | 10.32 | 10.39 | 1.00    | 0.93    | 0.97    |
|                           | <b>Tlr7</b>    | 854   | 1186  | 1144  | 9.74  | 10.21 | 10.16 | 1.00    | 1.39    | 1.34    |
|                           | <b>Stat1</b>   | 436   | 1171  | 1202  | 8.77  | 10.19 | 10.23 | 1.00    | 2.69    | 2.76    |
|                           | <b>Grb2</b>    | 1469  | 947   | 982   | 10.52 | 9.89  | 9.94  | 1.00    | 0.64    | 0.67    |
|                           | <b>Map3k5</b>  | 157   | 821   | 623   | 7.29  | 9.68  | 9.28  | 1.00    | 5.23    | 3.97    |
|                           | <b>Tollip</b>  | 649   | 788   | 803   | 9.34  | 9.62  | 9.65  | 1.00    | 1.21    | 1.24    |
|                           | <b>Mapk14</b>  | 800   | 744   | 767   | 9.64  | 9.54  | 9.58  | 1.00    | 0.93    | 0.96    |
|                           | <b>Gnaq</b>    | 517   | 743   | 688   | 9.01  | 9.54  | 9.43  | 1.00    | 1.44    | 1.33    |
|                           | <b>Shc1</b>    | 579   | 693   | 651   | 9.18  | 9.44  | 9.35  | 1.00    | 1.20    | 1.12    |
|                           | <b>Raf1</b>    | 568   | 685   | 633   | 9.15  | 9.42  | 9.31  | 1.00    | 1.21    | 1.11    |
|                           | <b>Nr3c1</b>   | 408   | 683   | 704   | 8.67  | 9.42  | 9.46  | 1.00    | 1.67    | 1.73    |
|                           | <b>Ddit3</b>   | 569   | 682   | 699   | 9.15  | 9.41  | 9.45  | 1.00    | 1.20    | 1.23    |
|                           | <b>Atf2</b>    | 508   | 629   | 639   | 8.99  | 9.30  | 9.32  | 1.00    | 1.24    | 1.26    |
|                           | <b>Myc_m</b>   | 252   | 626   | 616   | 7.98  | 9.29  | 9.27  | 1.00    | 2.48    | 2.44    |
|                           | <b>Tlr1</b>    | 199   | 622   | 597   | 7.64  | 9.28  | 9.22  | 1.00    | 3.13    | 3.00    |
|                           | <b>Maff</b>    | 42    | 558   | 312   | 5.39  | 9.12  | 8.29  | 1.00    | 13.29   | 7.43    |
|                           | <b>Jun</b>     | 434   | 531   | 206   | 8.76  | 9.05  | 7.69  | 1.00    | 1.22    | 0.47    |
|                           | <b>Daxx</b>    | 77    | 480   | 511   | 6.27  | 8.91  | 9.00  | 1.00    | 6.23    | 6.64    |
|                           | <b>Tgfr1</b>   | 936   | 469   | 398   | 9.87  | 8.87  | 8.64  | 1.00    | 0.50    | 0.43    |
|                           | <b>Rock2</b>   | 314   | 463   | 421   | 8.29  | 8.85  | 8.72  | 1.00    | 1.47    | 1.34    |
|                           | <b>Ly96</b>    | 347   | 436   | 426   | 8.44  | 8.77  | 8.73  | 1.00    | 1.26    | 1.23    |
|                           | <b>Map3k7</b>  | 391   | 433   | 392   | 8.61  | 8.76  | 8.61  | 1.00    | 1.11    | 1.00    |
|                           | <b>Mapk1</b>   | 401   | 410   | 358   | 8.65  | 8.68  | 8.48  | 1.00    | 1.02    | 0.89    |
|                           | <b>Hmgn1</b>   | 438   | 359   | 380   | 8.77  | 8.49  | 8.57  | 1.00    | 0.82    | 0.87    |
|                           | <b>H2-Eb1</b>  | 212   | 332   | 343   | 7.73  | 8.38  | 8.42  | 1.00    | 1.57    | 1.62    |



|                 |      |     |     |       |      |      |      |       |       |
|-----------------|------|-----|-----|-------|------|------|------|-------|-------|
| <b>Tlr6</b>     | 245  | 316 | 346 | 7.94  | 8.30 | 8.43 | 1.00 | 1.29  | 1.41  |
| <b>Cfl1</b>     | 243  | 280 | 259 | 7.92  | 8.13 | 8.02 | 1.00 | 1.15  | 1.07  |
| <b>Mapkapk</b>  | 235  | 279 | 298 | 7.88  | 8.12 | 8.22 | 1.00 | 1.19  | 1.27  |
| <b>Mapk8</b>    | 110  | 252 | 251 | 6.78  | 7.98 | 7.97 | 1.00 | 2.29  | 2.28  |
| <b>Traf2</b>    | 115  | 250 | 255 | 6.85  | 7.97 | 7.99 | 1.00 | 2.17  | 2.22  |
| <b>Tlr4</b>     | 372  | 242 | 256 | 8.54  | 7.92 | 8.00 | 1.00 | 0.65  | 0.69  |
| <b>Nox1</b>     | 20   | 238 | 197 | 4.32  | 7.89 | 7.62 | 1.00 | 11.90 | 9.85  |
| <b>Prkcb</b>    | 214  | 228 | 242 | 7.74  | 7.83 | 7.92 | 1.00 | 1.07  | 1.13  |
| <b>Fos</b>      | 1631 | 227 | 156 | 10.67 | 7.83 | 7.29 | 1.00 | 0.14  | 0.10  |
| <b>Max</b>      | 166  | 213 | 192 | 7.38  | 7.73 | 7.58 | 1.00 | 1.28  | 1.16  |
| <b>Mef2d</b>    | 274  | 207 | 191 | 8.10  | 7.69 | 7.58 | 1.00 | 0.76  | 0.70  |
| <b>Ccr2</b>     | 528  | 200 | 207 | 9.04  | 7.64 | 7.69 | 1.00 | 0.38  | 0.39  |
| <b>Mknk1</b>    | 285  | 198 | 245 | 8.15  | 7.63 | 7.94 | 1.00 | 0.69  | 0.86  |
| <b>Tradd</b>    | 264  | 190 | 216 | 8.04  | 7.57 | 7.75 | 1.00 | 0.72  | 0.82  |
| <b>Pla2g4a</b>  | 45   | 188 | 173 | 5.49  | 7.55 | 7.43 | 1.00 | 4.18  | 3.84  |
| <b>Map2k4</b>   | 128  | 173 | 177 | 7.00  | 7.43 | 7.47 | 1.00 | 1.35  | 1.38  |
| <b>Keap1</b>    | 153  | 163 | 183 | 7.26  | 7.35 | 7.52 | 1.00 | 1.07  | 1.20  |
| <b>Mef2a</b>    | 76   | 157 | 140 | 6.25  | 7.29 | 7.13 | 1.00 | 2.07  | 1.84  |
| <b>Nfatc3</b>   | 198  | 155 | 167 | 7.63  | 7.28 | 7.38 | 1.00 | 0.78  | 0.84  |
| <b>Nos2</b>     | 5    | 150 | 145 | 2.32  | 7.23 | 7.18 | 1.00 | 30.00 | 29.00 |
| <b>Cfb</b>      | 122  | 149 | 141 | 6.93  | 7.22 | 7.14 | 1.00 | 1.22  | 1.16  |
| <b>Mafg</b>     | 167  | 147 | 138 | 7.38  | 7.20 | 7.11 | 1.00 | 0.88  | 0.83  |
| <b>Mef2c</b>    | 561  | 147 | 159 | 9.13  | 7.20 | 7.31 | 1.00 | 0.26  | 0.28  |
| <b>Il6ra</b>    | 550  | 137 | 124 | 9.10  | 7.10 | 6.95 | 1.00 | 0.25  | 0.23  |
| <b>Bcl6</b>     | 267  | 114 | 118 | 8.06  | 6.83 | 6.88 | 1.00 | 0.43  | 0.44  |
| <b>Tlr3</b>     | 70   | 110 | 130 | 6.13  | 6.78 | 7.02 | 1.00 | 1.57  | 1.86  |
| <b>Rps6ka5</b>  | 55   | 100 | 89  | 5.78  | 6.64 | 6.48 | 1.00 | 1.82  | 1.62  |
| <b>Mafk</b>     | 57   | 99  | 108 | 5.83  | 6.63 | 6.75 | 1.00 | 1.74  | 1.89  |
| <b>Ccr3</b>     | 61   | 94  | 92  | 5.93  | 6.55 | 6.52 | 1.00 | 1.54  | 1.51  |
| <b>Cxcr4</b>    | 1063 | 93  | 78  | 10.05 | 6.54 | 6.29 | 1.00 | 0.09  | 0.07  |
| <b>Map3k1</b>   | 277  | 87  | 92  | 8.11  | 6.44 | 6.52 | 1.00 | 0.31  | 0.33  |
| <b>Limk1</b>    | 165  | 82  | 82  | 7.37  | 6.36 | 6.36 | 1.00 | 0.50  | 0.50  |
| <b>Ripk1</b>    | 133  | 80  | 87  | 7.06  | 6.32 | 6.44 | 1.00 | 0.60  | 0.65  |
| <b>Il1rap</b>   | 72   | 75  | 71  | 6.17  | 6.23 | 6.15 | 1.00 | 1.04  | 0.99  |
| <b>Pdgfa</b>    | 206  | 73  | 77  | 7.69  | 6.19 | 6.27 | 1.00 | 0.35  | 0.37  |
| <b>Elk1</b>     | 36   | 58  | 58  | 5.17  | 5.86 | 5.86 | 1.00 | 1.61  | 1.61  |
| <b>Hdac4</b>    | 81   | 52  | 51  | 6.34  | 5.70 | 5.67 | 1.00 | 0.64  | 0.63  |
| <b>Il1rn</b>    | 12   | 49  | 37  | 3.58  | 5.61 | 5.21 | 1.00 | 4.08  | 3.08  |
| <b>Ccr1</b>     | 53   | 46  | 54  | 5.73  | 5.52 | 5.75 | 1.00 | 0.87  | 1.02  |
| <b>Il1r1</b>    | 11   | 41  | 28  | 3.46  | 5.36 | 4.81 | 1.00 | 3.73  | 2.55  |
| <b>Cd55</b>     | 5    | 38  | 35  | 2.32  | 5.25 | 5.13 | 1.00 | 7.60  | 7.00  |
| <b>Creb1</b>    | 43   | 38  | 30  | 5.43  | 5.25 | 4.91 | 1.00 | 0.88  | 0.70  |
| <b>C1ra</b>     | 24   | 37  | 30  | 4.58  | 5.21 | 4.91 | 1.00 | 1.54  | 1.25  |
| <b>Ccr7</b>     | 3    | 37  | 30  | 1.58  | 5.21 | 4.91 | 1.00 | 12.33 | 10.00 |
| <b>Masp1</b>    | 13   | 37  | 25  | 3.70  | 5.21 | 4.64 | 1.00 | 2.85  | 1.92  |
| <b>Hspb2</b>    | 3    | 34  | 23  | 1.58  | 5.09 | 4.52 | 1.00 | 11.33 | 7.67  |
| <b>Ptk2</b>     | 25   | 34  | 28  | 4.64  | 5.09 | 4.81 | 1.00 | 1.36  | 1.12  |
| <b>H2-Ea-ps</b> | 7    | 20  | 16  | 2.81  | 4.32 | 4.00 | 1.00 | 2.86  | 2.29  |
| <b>C8a</b>      | 4    | 17  | 22  | 2.00  | 4.09 | 4.46 | 1.00 | 4.25  | 5.50  |
| <b>Crp</b>      | 1    | 17  | 17  | 0.00  | 4.09 | 4.09 | 1.00 | 17.00 | 17.00 |
| <b>Lta</b>      | 7    | 15  | 17  | 2.81  | 3.91 | 4.09 | 1.00 | 2.14  | 2.43  |
| <b>Hras1</b>    | 9    | 13  | 9   | 3.17  | 3.70 | 3.17 | 1.00 | 1.44  | 1.00  |
| <b>Cd4</b>      | 29   | 12  | 15  | 4.86  | 3.58 | 3.91 | 1.00 | 0.41  | 0.52  |
| <b>Kng1</b>     | 3    | 12  | 16  | 1.58  | 3.58 | 4.00 | 1.00 | 4.00  | 5.33  |
| <b>Ltb</b>      | 8    | 12  | 8   | 3.00  | 3.58 | 3.00 | 1.00 | 1.50  | 1.00  |

|                 |    |    |    |       |      |       |         |         |         |
|-----------------|----|----|----|-------|------|-------|---------|---------|---------|
| <b>Myl2</b>     | 4  | 12 | 5  | 2.00  | 3.58 | 2.32  | 1.00    | 3.00    | 1.25    |
| <b>Cxcr1</b>    | 10 | 11 | 13 | 3.32  | 3.46 | 3.70  | 1.00    | 1.10    | 1.30    |
| <b>Map2k6</b>   | 12 | 11 | 8  | 3.58  | 3.46 | 3.00  | 1.00    | 0.92    | 0.67    |
| <b>C1s</b>      | 1  | 9  | 2  | 0.00  | 3.17 | 1.00  | 1.00    | 9.00    | 2.00    |
| <b>Cd40lg</b>   | 2  | 9  | 7  | 1.00  | 3.17 | 2.81  | 1.00    | 4.50    | 3.50    |
| <b>Hspb1</b>    | 7  | 8  | 6  | 2.81  | 3.00 | 2.58  | 1.00    | 1.14    | 0.86    |
| <b>Il22ra2</b>  | 1  | 8  | 3  | 0.00  | 3.00 | 1.58  | 1.00    | 8.00    | 3.00    |
| <b>C2</b>       | 4  | 7  | 6  | 2.00  | 2.81 | 2.58  | 1.00    | 1.75    | 1.50    |
| <b>C4a</b>      | 8  | 7  | 6  | 3.00  | 2.81 | 2.58  | 1.00    | 0.88    | 0.75    |
| <b>Ccr4</b>     | 11 | 7  | 7  | 3.46  | 2.81 | 2.81  | 1.00    | 0.64    | 0.64    |
| <b>Fxyd2</b>    | 3  | 7  | 6  | 1.58  | 2.81 | 2.58  | 1.00    | 2.33    | 2.00    |
| <b>Hc</b>       | 2  | 6  | 0  | 1.00  | 2.58 | #NUM! | 1.00    | 3.00    | 0.00    |
| <b>Map3k9</b>   | 25 | 6  | 7  | 4.64  | 2.58 | 2.81  | 1.00    | 0.24    | 0.28    |
| <b>Masp2</b>    | 2  | 6  | 3  | 1.00  | 2.58 | 1.58  | 1.00    | 3.00    | 1.50    |
| <b>Tlr5</b>     | 2  | 6  | 6  | 1.00  | 2.58 | 2.58  | 1.00    | 3.00    | 3.00    |
| <b>C6</b>       | 2  | 5  | 6  | 1.00  | 2.32 | 2.58  | 1.00    | 2.50    | 3.00    |
| <b>Cxcr2</b>    | 1  | 5  | 8  | 0.00  | 2.32 | 3.00  | 1.00    | 5.00    | 8.00    |
| <b>Il23r</b>    | 0  | 5  | 3  | #NUM! | 2.32 | 1.58  | #DIV/0! | #DIV/0! | #DIV/0! |
| <b>Ppp1r12l</b> | 16 | 5  | 7  | 4.00  | 2.32 | 2.81  | 1.00    | 0.31    | 0.44    |
| <b>Prkca</b>    | 5  | 5  | 8  | 2.32  | 2.32 | 3.00  | 1.00    | 1.00    | 1.60    |
| <b>Tnfsf14</b>  | 8  | 5  | 6  | 3.00  | 2.32 | 2.58  | 1.00    | 0.63    | 0.75    |
| <b>Cfd</b>      | 2  | 4  | 3  | 1.00  | 2.00 | 1.58  | 1.00    | 2.00    | 1.50    |
| <b>Mbl2</b>     | 4  | 4  | 3  | 2.00  | 2.00 | 1.58  | 1.00    | 1.00    | 0.75    |
| <b>Pik3c2g</b>  | 1  | 3  | 5  | 0.00  | 1.58 | 2.32  | 1.00    | 3.00    | 5.00    |
| <b>C9</b>       | 4  | 2  | 2  | 2.00  | 1.00 | 1.00  | 1.00    | 0.50    | 0.50    |
| <b>Gngt1</b>    | 3  | 2  | 3  | 1.58  | 1.00 | 1.58  | 1.00    | 0.67    | 1.00    |
| <b>C7</b>       | 3  | 1  | 6  | 1.58  | 0.00 | 2.58  | 1.00    | 0.33    | 2.00    |
| <b>C8b</b>      | 0  | 1  | 0  | #NUM! | 0.00 | #NUM! | #DIV/0! | #DIV/0! | #DIV/0! |
| <b>Mef2b</b>    | 3  | 1  | 1  | 1.58  | 0.00 | 0.00  | 1.00    | 0.33    | 0.33    |
| <b>Plcb1</b>    | 3  | 1  | 2  | 1.58  | 0.00 | 1.00  | 1.00    | 0.33    | 0.67    |
